# Supplementary material for: Genome-wide discovery of human splicing branchpoints
Source: HighWire-hosted journal article supplement (doi:10.1101/gr.182899.114), 2015-01-05
Supplement: Supplemental_TableS1.xlsx [file Supplemental_TableS1.xlsx]

## Sheet: Match Only
Supplementary Table 1. Human genome (hg19) coordinates of branchpoint nucleotides with support from (i) exact read match to predicted only, (ii) matches and insertion or deletions coincident with branchpints, (iii) matches and sequencing error at branchpoint (high confidence branchpoint set), (iv) branchpoint from intial split and inverted alignment.
Chromosome	Start	Stop	ID	Score	Strand
chr1	91661	91662	chr1_91661_91662_A	0	-
chr1	169295	169296	chr1_169295_169296_A	0	-
chr1	320859	320860	chr1_320859_320860_A	0	+
chr1	705123	705124	chr1_705123_705124_A	0	-
chr1	708510	708511	chr1_708510_708511_A	0	-
chr1	717289	717290	chr1_717289_717290_A	0	+
chr1	784824	784825	chr1_784824_784825_A	0	+
chr1	788027	788028	chr1_788027_788028_A	0	+
chr1	850139	850140	chr1_850139_850140_A	0	+
chr1	853524	853525	chr1_853524_853525_A	0	-
chr1	861273	861274	chr1_861273_861274_A	0	+
chr1	866388	866389	chr1_866388_866389_A	0	+
chr1	866389	866390	chr1_866389_866390_A	0	+
chr1	866391	866392	chr1_866391_866392_A	0	+
chr1	876501	876502	chr1_876501_876502_A	0	+
chr1	878598	878599	chr1_878598_878599_A	0	+
chr1	878610	878611	chr1_878610_878611_A	0	+
chr1	878613	878614	chr1_878613_878614_A	0	+
chr1	878614	878615	chr1_878614_878615_A	0	+
chr1	879051	879052	chr1_879051_879052_T	0	+
chr1	879053	879054	chr1_879053_879054_A	0	+
chr1	880204	880205	chr1_880204_880205_A	0	-
chr1	880546	880547	chr1_880546_880547_A	0	-
chr1	880550	880551	chr1_880550_880551_A	0	-
chr1	880552	880553	chr1_880552_880553_A	0	-
chr1	880556	880557	chr1_880556_880557_A	0	-
chr1	881062	881063	chr1_881062_881063_A	0	-
chr1	881941	881942	chr1_881941_881942_A	0	-
chr1	881949	881950	chr1_881949_881950_A	0	-
chr1	887538	887539	chr1_887538_887539_A	0	-
chr1	887540	887541	chr1_887540_887541_T	0	-
chr1	887997	887998	chr1_887997_887998_A	0	-
chr1	887998	887999	chr1_887998_887999_G	0	-
chr1	888013	888014	chr1_888013_888014_A	0	-
chr1	891621	891622	chr1_891621_891622_A	0	-
chr1	891627	891628	chr1_891627_891628_C	0	-
chr1	892684	892685	chr1_892684_892685_C	0	-
chr1	899172	899173	chr1_899172_899173_A	0	+
chr1	899268	899269	chr1_899268_899269_T	0	+
chr1	908855	908856	chr1_908855_908856_A	0	+
chr1	977312	977313	chr1_977312_977313_A	0	+
chr1	980508	980509	chr1_980508_980509_A	0	+
chr1	980516	980517	chr1_980516_980517_T	0	+
chr1	981081	981082	chr1_981081_981082_A	0	+
chr1	981086	981087	chr1_981086_981087_A	0	+
chr1	981087	981088	chr1_981087_981088_C	0	+
chr1	981091	981092	chr1_981091_981092_C	0	+
chr1	982621	982622	chr1_982621_982622_T	0	+
chr1	982688	982689	chr1_982688_982689_A	0	+
chr1	982934	982935	chr1_982934_982935_G	0	+
chr1	989112	989113	chr1_989112_989113_A	0	+
chr1	989799	989800	chr1_989799_989800_G	0	+
chr1	989800	989801	chr1_989800_989801_A	0	+
chr1	990170	990171	chr1_990170_990171_A	0	+
chr1	990181	990182	chr1_990181_990182_A	0	+
chr1	995640	995641	chr1_995640_995641_A	0	+
chr1	1018393	1018394	chr1_1018393_1018394_A	0	-
chr1	1019486	1019487	chr1_1019486_1019487_A	0	-
chr1	1019488	1019489	chr1_1019488_1019489_C	0	-
chr1	1019490	1019491	chr1_1019490_1019491_T	0	-
chr1	1019501	1019502	chr1_1019501_1019502_A	0	-
chr1	1019908	1019909	chr1_1019908_1019909_A	0	-
chr1	1019914	1019915	chr1_1019914_1019915_A	0	-
chr1	1021409	1021410	chr1_1021409_1021410_A	0	-
chr1	1022606	1022607	chr1_1022606_1022607_C	0	-
chr1	1025826	1025827	chr1_1025826_1025827_A	0	-
chr1	1153090	1153091	chr1_1153090_1153091_A	0	-
chr1	1153215	1153216	chr1_1153215_1153216_A	0	-
chr1	1153227	1153228	chr1_1153227_1153228_C	0	-
chr1	1154327	1154328	chr1_1154327_1154328_C	0	-
chr1	1191526	1191527	chr1_1191526_1191527_A	0	-
chr1	1191528	1191529	chr1_1191528_1191529_T	0	-
chr1	1201700	1201701	chr1_1201700_1201701_C	0	-
chr1	1203394	1203395	chr1_1203394_1203395_A	0	-
chr1	1222125	1222126	chr1_1222125_1222126_A	0	+
chr1	1229597	1229598	chr1_1229597_1229598_A	0	-
chr1	1230025	1230026	chr1_1230025_1230026_A	0	-
chr1	1230955	1230956	chr1_1230955_1230956_T	0	-
chr1	1232032	1232033	chr1_1232032_1232033_A	0	-
chr1	1233509	1233510	chr1_1233509_1233510_A	0	-
chr1	1236103	1236104	chr1_1236103_1236104_A	0	-
chr1	1237449	1237450	chr1_1237449_1237450_A	0	-
chr1	1238682	1238683	chr1_1238682_1238683_A	0	-
chr1	1239545	1239546	chr1_1239545_1239546_A	0	-
chr1	1244813	1244814	chr1_1244813_1244814_A	0	+
chr1	1244819	1244820	chr1_1244819_1244820_A	0	+
chr1	1246685	1246686	chr1_1246685_1246686_A	0	+
chr1	1247770	1247771	chr1_1247770_1247771_A	0	-
chr1	1248522	1248523	chr1_1248522_1248523_G	0	-
chr1	1248523	1248524	chr1_1248523_1248524_A	0	-
chr1	1248524	1248525	chr1_1248524_1248525_G	0	-
chr1	1249319	1249320	chr1_1249319_1249320_C	0	-
chr1	1249320	1249321	chr1_1249320_1249321_A	0	-
chr1	1249322	1249323	chr1_1249322_1249323_T	0	-
chr1	1249764	1249765	chr1_1249764_1249765_C	0	-
chr1	1249766	1249767	chr1_1249766_1249767_T	0	-
chr1	1249767	1249768	chr1_1249767_1249768_C	0	-
chr1	1249774	1249775	chr1_1249774_1249775_C	0	-
chr1	1250364	1250365	chr1_1250364_1250365_A	0	-
chr1	1254830	1254831	chr1_1254830_1254831_A	0	-
chr1	1254926	1254927	chr1_1254926_1254927_T	0	-
chr1	1255927	1255928	chr1_1255927_1255928_A	0	-
chr1	1255928	1255929	chr1_1255928_1255929_A	0	-
chr1	1255929	1255930	chr1_1255929_1255930_A	0	-
chr1	1255934	1255935	chr1_1255934_1255935_A	0	-
chr1	1255935	1255936	chr1_1255935_1255936_A	0	-
chr1	1271928	1271929	chr1_1271928_1271929_A	0	-
chr1	1274056	1274057	chr1_1274056_1274057_A	0	-
chr1	1274057	1274058	chr1_1274057_1274058_A	0	-
chr1	1274823	1274824	chr1_1274823_1274824_C	0	-
chr1	1275897	1275898	chr1_1275897_1275898_A	0	-
chr1	1275898	1275899	chr1_1275898_1275899_G	0	-
chr1	1275904	1275905	chr1_1275904_1275905_A	0	-
chr1	1277213	1277214	chr1_1277213_1277214_A	0	-
chr1	1277555	1277556	chr1_1277555_1277556_A	0	-
chr1	1277882	1277883	chr1_1277882_1277883_A	0	-
chr1	1309848	1309849	chr1_1309848_1309849_A	0	-
chr1	1309849	1309850	chr1_1309849_1309850_G	0	-
chr1	1310195	1310196	chr1_1310195_1310196_G	0	-
chr1	1322992	1322993	chr1_1322992_1322993_A	0	-
chr1	1326269	1326270	chr1_1326269_1326270_A	0	-
chr1	1326972	1326973	chr1_1326972_1326973_A	0	-
chr1	1328213	1328214	chr1_1328213_1328214_A	0	-
chr1	1328843	1328844	chr1_1328843_1328844_C	0	-
chr1	1328862	1328863	chr1_1328862_1328863_A	0	-
chr1	1333752	1333753	chr1_1333752_1333753_A	0	-
chr1	1334088	1334089	chr1_1334088_1334089_G	0	-
chr1	1335328	1335329	chr1_1335328_1335329_A	0	+
chr1	1335954	1335955	chr1_1335954_1335955_T	0	+
chr1	1335957	1335958	chr1_1335957_1335958_A	0	+
chr1	1341291	1341292	chr1_1341291_1341292_A	0	-
chr1	1414273	1414274	chr1_1414273_1414274_T	0	+
chr1	1414390	1414391	chr1_1414390_1414391_C	0	+
chr1	1414396	1414397	chr1_1414396_1414397_A	0	+
chr1	1417491	1417492	chr1_1417491_1417492_T	0	+
chr1	1417493	1417494	chr1_1417493_1417494_A	0	+
chr1	1417891	1417892	chr1_1417891_1417892_T	0	+
chr1	1417899	1417900	chr1_1417899_1417900_G	0	+
chr1	1417902	1417903	chr1_1417902_1417903_C	0	+
chr1	1417903	1417904	chr1_1417903_1417904_A	0	+
chr1	1417905	1417906	chr1_1417905_1417906_A	0	+
chr1	1421128	1421129	chr1_1421128_1421129_G	0	+
chr1	1421129	1421130	chr1_1421129_1421130_A	0	+
chr1	1421133	1421134	chr1_1421133_1421134_A	0	+
chr1	1421134	1421135	chr1_1421134_1421135_A	0	+
chr1	1421143	1421144	chr1_1421143_1421144_C	0	+
chr1	1421433	1421434	chr1_1421433_1421434_A	0	+
chr1	1421455	1421456	chr1_1421455_1421456_A	0	+
chr1	1421882	1421883	chr1_1421882_1421883_A	0	+
chr1	1421886	1421887	chr1_1421886_1421887_A	0	+
chr1	1421887	1421888	chr1_1421887_1421888_A	0	+
chr1	1421889	1421890	chr1_1421889_1421890_A	0	+
chr1	1421899	1421900	chr1_1421899_1421900_T	0	+
chr1	1423205	1423206	chr1_1423205_1423206_T	0	+
chr1	1423207	1423208	chr1_1423207_1423208_A	0	+
chr1	1423218	1423219	chr1_1423218_1423219_G	0	+
chr1	1425602	1425603	chr1_1425602_1425603_C	0	+
chr1	1425606	1425607	chr1_1425606_1425607_A	0	+
chr1	1425607	1425608	chr1_1425607_1425608_G	0	+
chr1	1452940	1452941	chr1_1452940_1452941_T	0	+
chr1	1453057	1453058	chr1_1453057_1453058_C	0	+
chr1	1453063	1453064	chr1_1453063_1453064_A	0	+
chr1	1455495	1455496	chr1_1455495_1455496_G	0	+
chr1	1455496	1455497	chr1_1455496_1455497_A	0	+
chr1	1455872	1455873	chr1_1455872_1455873_C	0	+
chr1	1455894	1455895	chr1_1455894_1455895_T	0	+
chr1	1455900	1455901	chr1_1455900_1455901_C	0	+
chr1	1455905	1455906	chr1_1455905_1455906_C	0	+
chr1	1455906	1455907	chr1_1455906_1455907_A	0	+
chr1	1455908	1455909	chr1_1455908_1455909_A	0	+
chr1	1458858	1458859	chr1_1458858_1458859_A	0	+
chr1	1458862	1458863	chr1_1458862_1458863_G	0	+
chr1	1458863	1458864	chr1_1458863_1458864_A	0	+
chr1	1459182	1459183	chr1_1459182_1459183_A	0	+
chr1	1459184	1459185	chr1_1459184_1459185_A	0	+
chr1	1459611	1459612	chr1_1459611_1459612_A	0	+
chr1	1459618	1459619	chr1_1459618_1459619_A	0	+
chr1	1459625	1459626	chr1_1459625_1459626_C	0	+
chr1	1460584	1460585	chr1_1460584_1460585_A	0	+
chr1	1463044	1463045	chr1_1463044_1463045_A	0	+
chr1	1463047	1463048	chr1_1463047_1463048_A	0	+
chr1	1463049	1463050	chr1_1463049_1463050_C	0	+
chr1	1463053	1463054	chr1_1463053_1463054_A	0	+
chr1	1477567	1477568	chr1_1477567_1477568_A	0	-
chr1	1479393	1479394	chr1_1479393_1479394_A	0	-
chr1	1479394	1479395	chr1_1479394_1479395_G	0	-
chr1	1479395	1479396	chr1_1479395_1479396_T	0	-
chr1	1558744	1558745	chr1_1558744_1558745_C	0	+
chr1	1559135	1559136	chr1_1559135_1559136_A	0	+
chr1	1560148	1560149	chr1_1560148_1560149_A	0	+
chr1	1560636	1560637	chr1_1560636_1560637_C	0	+
chr1	1562008	1562009	chr1_1562008_1562009_A	0	+
chr1	1562972	1562973	chr1_1562972_1562973_G	0	+
chr1	1563024	1563025	chr1_1563024_1563025_C	0	+
chr1	1563027	1563028	chr1_1563027_1563028_C	0	+
chr1	1563032	1563033	chr1_1563032_1563033_C	0	+
chr1	1563033	1563034	chr1_1563033_1563034_C	0	+
chr1	1599938	1599939	chr1_1599938_1599939_A	0	-
chr1	1601195	1601196	chr1_1601195_1601196_A	0	-
chr1	1601198	1601199	chr1_1601198_1601199_C	0	-
chr1	1601616	1601617	chr1_1601616_1601617_A	0	-
chr1	1607052	1607053	chr1_1607052_1607053_A	0	-
chr1	1607053	1607054	chr1_1607053_1607054_G	0	-
chr1	1607056	1607057	chr1_1607056_1607057_G	0	-
chr1	1607680	1607681	chr1_1607680_1607681_G	0	-
chr1	1622857	1622858	chr1_1622857_1622858_A	0	-
chr1	1634728	1634729	chr1_1634728_1634729_C	0	-
chr1	1634734	1634735	chr1_1634734_1634735_C	0	-
chr1	1634738	1634739	chr1_1634738_1634739_A	0	-
chr1	1634741	1634742	chr1_1634741_1634742_A	0	-
chr1	1634742	1634743	chr1_1634742_1634743_G	0	-
chr1	1634744	1634745	chr1_1634744_1634745_A	0	-
chr1	1634746	1634747	chr1_1634746_1634747_A	0	-
chr1	1635080	1635081	chr1_1635080_1635081_A	0	-
chr1	1636112	1636113	chr1_1636112_1636113_A	0	-
chr1	1636113	1636114	chr1_1636113_1636114_C	0	-
chr1	1636488	1636489	chr1_1636488_1636489_A	0	-
chr1	1636492	1636493	chr1_1636492_1636493_T	0	-
chr1	1637191	1637192	chr1_1637191_1637192_A	0	-
chr1	1637192	1637193	chr1_1637192_1637193_C	0	-
chr1	1639039	1639040	chr1_1639039_1639040_A	0	-
chr1	1639043	1639044	chr1_1639043_1639044_A	0	-
chr1	1639044	1639045	chr1_1639044_1639045_T	0	-
chr1	1639046	1639047	chr1_1639046_1639047_C	0	-
chr1	1639057	1639058	chr1_1639057_1639058_A	0	-
chr1	1639710	1639711	chr1_1639710_1639711_T	0	-
chr1	1640594	1640595	chr1_1640594_1640595_A	0	-
chr1	1641110	1641111	chr1_1641110_1641111_A	0	-
chr1	1647935	1647936	chr1_1647935_1647936_A	0	-
chr1	1653169	1653170	chr1_1653169_1653170_A	0	-
chr1	1669910	1669911	chr1_1669910_1669911_A	0	-
chr1	1669911	1669912	chr1_1669911_1669912_G	0	-
chr1	1669914	1669915	chr1_1669914_1669915_G	0	-
chr1	1670519	1670520	chr1_1670519_1670520_T	0	-
chr1	1670532	1670533	chr1_1670532_1670533_A	0	-
chr1	1670538	1670539	chr1_1670538_1670539_G	0	-
chr1	1684521	1684522	chr1_1684521_1684522_A	0	-
chr1	1685112	1685113	chr1_1685112_1685113_A	0	-
chr1	1685113	1685114	chr1_1685113_1685114_C	0	-
chr1	1685118	1685119	chr1_1685118_1685119_G	0	-
chr1	1685124	1685125	chr1_1685124_1685125_A	0	-
chr1	1685847	1685848	chr1_1685847_1685848_A	0	-
chr1	1686154	1686155	chr1_1686154_1686155_A	0	-
chr1	1686164	1686165	chr1_1686164_1686165_A	0	-
chr1	1686168	1686169	chr1_1686168_1686169_A	0	-
chr1	1686170	1686171	chr1_1686170_1686171_T	0	-
chr1	1686173	1686174	chr1_1686173_1686174_C	0	-
chr1	1688070	1688071	chr1_1688070_1688071_A	0	-
chr1	1688074	1688075	chr1_1688074_1688075_A	0	-
chr1	1688177	1688178	chr1_1688177_1688178_C	0	-
chr1	1696922	1696923	chr1_1696922_1696923_A	0	-
chr1	1718519	1718520	chr1_1718519_1718520_A	0	-
chr1	1718898	1718899	chr1_1718898_1718899_A	0	-
chr1	1736042	1736043	chr1_1736042_1736043_A	0	-
chr1	1736056	1736057	chr1_1736056_1736057_A	0	-
chr1	1736059	1736060	chr1_1736059_1736060_A	0	-
chr1	1738004	1738005	chr1_1738004_1738005_A	0	-
chr1	2082198	2082199	chr1_2082198_2082199_A	0	+
chr1	2103474	2103475	chr1_2103474_2103475_A	0	+
chr1	2106172	2106173	chr1_2106172_2106173_A	0	+
chr1	2116328	2116329	chr1_2116328_2116329_A	0	+
chr1	2121240	2121241	chr1_2121240_2121241_A	0	-
chr1	2132686	2132687	chr1_2132686_2132687_A	0	-
chr1	2138122	2138123	chr1_2138122_2138123_A	0	-
chr1	2234699	2234700	chr1_2234699_2234700_A	0	+
chr1	2235254	2235255	chr1_2235254_2235255_C	0	+
chr1	2235255	2235256	chr1_2235255_2235256_C	0	+
chr1	2235258	2235259	chr1_2235258_2235259_A	0	+
chr1	2237429	2237430	chr1_2237429_2237430_A	0	+
chr1	2237432	2237433	chr1_2237432_2237433_G	0	+
chr1	2237433	2237434	chr1_2237433_2237434_A	0	+
chr1	2237993	2237994	chr1_2237993_2237994_T	0	+
chr1	2316532	2316533	chr1_2316532_2316533_A	0	-
chr1	2319005	2319006	chr1_2319005_2319006_T	0	-
chr1	2327194	2327195	chr1_2327194_2327195_T	0	+
chr1	2328528	2328529	chr1_2328528_2328529_A	0	+
chr1	2332274	2332275	chr1_2332274_2332275_G	0	+
chr1	2332275	2332276	chr1_2332275_2332276_A	0	+
chr1	2334444	2334445	chr1_2334444_2334445_A	0	+
chr1	2334447	2334448	chr1_2334447_2334448_A	0	+
chr1	2334450	2334451	chr1_2334450_2334451_T	0	+
chr1	2337294	2337295	chr1_2337294_2337295_A	0	-
chr1	2337295	2337296	chr1_2337295_2337296_G	0	-
chr1	2337298	2337299	chr1_2337298_2337299_T	0	-
chr1	2340318	2340319	chr1_2340318_2340319_A	0	-
chr1	2340327	2340328	chr1_2340327_2340328_A	0	-
chr1	2440520	2440521	chr1_2440520_2440521_A	0	-
chr1	2440521	2440522	chr1_2440521_2440522_C	0	-
chr1	2442210	2442211	chr1_2442210_2442211_A	0	-
chr1	2442224	2442225	chr1_2442224_2442225_A	0	-
chr1	2442247	2442248	chr1_2442247_2442248_A	0	-
chr1	2442851	2442852	chr1_2442851_2442852_A	0	-
chr1	2443148	2443149	chr1_2443148_2443149_A	0	-
chr1	2444504	2444505	chr1_2444504_2444505_A	0	-
chr1	2445928	2445929	chr1_2445928_2445929_A	0	-
chr1	2447187	2447188	chr1_2447187_2447188_A	0	-
chr1	2450057	2450058	chr1_2450057_2450058_A	0	-
chr1	2450063	2450064	chr1_2450063_2450064_A	0	-
chr1	2450065	2450066	chr1_2450065_2450066_A	0	-
chr1	2452772	2452773	chr1_2452772_2452773_C	0	-
chr1	2452773	2452774	chr1_2452773_2452774_T	0	-
chr1	2452775	2452776	chr1_2452775_2452776_C	0	-
chr1	2452778	2452779	chr1_2452778_2452779_C	0	-
chr1	2452779	2452780	chr1_2452779_2452780_G	0	-
chr1	2452785	2452786	chr1_2452785_2452786_A	0	-
chr1	2452786	2452787	chr1_2452786_2452787_C	0	-
chr1	2452787	2452788	chr1_2452787_2452788_A	0	-
chr1	2520335	2520336	chr1_2520335_2520336_C	0	+
chr1	2520341	2520342	chr1_2520341_2520342_T	0	+
chr1	3383707	3383708	chr1_3383707_3383708_A	0	+
chr1	3385416	3385417	chr1_3385416_3385417_A	0	+
chr1	3391244	3391245	chr1_3391244_3391245_T	0	+
chr1	3394968	3394969	chr1_3394968_3394969_A	0	+
chr1	3396060	3396061	chr1_3396060_3396061_A	0	+
chr1	3396980	3396981	chr1_3396980_3396981_T	0	+
chr1	3396982	3396983	chr1_3396982_3396983_A	0	+
chr1	3407549	3407550	chr1_3407549_3407550_A	0	-
chr1	3410744	3410745	chr1_3410744_3410745_A	0	-
chr1	3412603	3412604	chr1_3412603_3412604_A	0	-
chr1	3413943	3413944	chr1_3413943_3413944_A	0	-
chr1	3415416	3415417	chr1_3415416_3415417_A	0	-
chr1	3416633	3416634	chr1_3416633_3416634_A	0	-
chr1	3425279	3425280	chr1_3425279_3425280_A	0	-
chr1	3428290	3428291	chr1_3428290_3428291_A	0	-
chr1	3542255	3542256	chr1_3542255_3542256_A	0	+
chr1	3542257	3542258	chr1_3542257_3542258_G	0	+
chr1	3547708	3547709	chr1_3547708_3547709_A	0	-
chr1	3547718	3547719	chr1_3547718_3547719_C	0	-
chr1	3551878	3551879	chr1_3551878_3551879_A	0	-
chr1	3551879	3551880	chr1_3551879_3551880_A	0	-
chr1	3552640	3552641	chr1_3552640_3552641_A	0	-
chr1	3563386	3563387	chr1_3563386_3563387_A	0	-
chr1	3644047	3644048	chr1_3644047_3644048_A	0	+
chr1	3644664	3644665	chr1_3644664_3644665_A	0	+
chr1	3653145	3653146	chr1_3653145_3653146_C	0	-
chr1	3653156	3653157	chr1_3653156_3653157_A	0	-
chr1	3692334	3692335	chr1_3692334_3692335_A	0	+
chr1	3698198	3698199	chr1_3698198_3698199_A	0	-
chr1	3698200	3698201	chr1_3698200_3698201_T	0	-
chr1	3699357	3699358	chr1_3699357_3699358_A	0	-
chr1	3700703	3700704	chr1_3700703_3700704_A	0	-
chr1	3701787	3701788	chr1_3701787_3701788_A	0	-
chr1	3701789	3701790	chr1_3701789_3701790_T	0	-
chr1	3732106	3732107	chr1_3732106_3732107_A	0	-
chr1	3740147	3740148	chr1_3740147_3740148_T	0	-
chr1	3743020	3743021	chr1_3743020_3743021_A	0	-
chr1	3745960	3745961	chr1_3745960_3745961_A	0	-
chr1	3753283	3753284	chr1_3753283_3753284_A	0	-
chr1	3753289	3753290	chr1_3753289_3753290_C	0	-
chr1	3754104	3754105	chr1_3754104_3754105_A	0	-
chr1	3756369	3756370	chr1_3756369_3756370_A	0	-
chr1	3761940	3761941	chr1_3761940_3761941_A	0	-
chr1	3786144	3786145	chr1_3786144_3786145_A	0	+
chr1	3806663	3806664	chr1_3806663_3806664_T	0	-
chr1	5924120	5924121	chr1_5924120_5924121_A	0	-
chr1	5924121	5924122	chr1_5924121_5924122_C	0	-
chr1	5926541	5926542	chr1_5926541_5926542_A	0	-
chr1	5927192	5927193	chr1_5927192_5927193_A	0	-
chr1	5927205	5927206	chr1_5927205_5927206_A	0	-
chr1	5933426	5933427	chr1_5933426_5933427_C	0	-
chr1	5967304	5967305	chr1_5967304_5967305_A	0	-
chr1	6027451	6027452	chr1_6027451_6027452_A	0	-
chr1	6133765	6133766	chr1_6133765_6133766_A	0	+
chr1	6145236	6145237	chr1_6145236_6145237_A	0	+
chr1	6145241	6145242	chr1_6145241_6145242_A	0	+
chr1	6149039	6149040	chr1_6149039_6149040_C	0	+
chr1	6150420	6150421	chr1_6150420_6150421_G	0	+
chr1	6150421	6150422	chr1_6150421_6150422_A	0	+
chr1	6155342	6155343	chr1_6155342_6155343_C	0	+
chr1	6157306	6157307	chr1_6157306_6157307_A	0	+
chr1	6158521	6158522	chr1_6158521_6158522_T	0	+
chr1	6253139	6253140	chr1_6253139_6253140_A	0	-
chr1	6266569	6266570	chr1_6266569_6266570_G	0	+
chr1	6266570	6266571	chr1_6266570_6266571_C	0	+
chr1	6266571	6266572	chr1_6266571_6266572_C	0	+
chr1	6266573	6266574	chr1_6266573_6266574_C	0	+
chr1	6271903	6271904	chr1_6271903_6271904_A	0	+
chr1	6272271	6272272	chr1_6272271_6272272_A	0	+
chr1	6272272	6272273	chr1_6272272_6272273_C	0	+
chr1	6272710	6272711	chr1_6272710_6272711_C	0	+
chr1	6272718	6272719	chr1_6272718_6272719_A	0	+
chr1	6272719	6272720	chr1_6272719_6272720_A	0	+
chr1	6279275	6279276	chr1_6279275_6279276_A	0	+
chr1	6292213	6292214	chr1_6292213_6292214_A	0	-
chr1	6293726	6293727	chr1_6293726_6293727_A	0	-
chr1	6294601	6294602	chr1_6294601_6294602_A	0	-
chr1	6296993	6296994	chr1_6296993_6296994_A	0	+
chr1	6310085	6310086	chr1_6310085_6310086_A	0	-
chr1	6324783	6324784	chr1_6324783_6324784_A	0	-
chr1	6522258	6522259	chr1_6522258_6522259_A	0	-
chr1	6522750	6522751	chr1_6522750_6522751_A	0	-
chr1	6524813	6524814	chr1_6524813_6524814_A	0	-
chr1	6525632	6525633	chr1_6525632_6525633_A	0	-
chr1	6525638	6525639	chr1_6525638_6525639_A	0	-
chr1	6528666	6528667	chr1_6528666_6528667_A	0	-
chr1	6529778	6529779	chr1_6529778_6529779_A	0	-
chr1	6529779	6529780	chr1_6529779_6529780_G	0	-
chr1	6529819	6529820	chr1_6529819_6529820_A	0	-
chr1	6529893	6529894	chr1_6529893_6529894_A	0	-
chr1	6530437	6530438	chr1_6530437_6530438_A	0	-
chr1	6531192	6531193	chr1_6531192_6531193_A	0	-
chr1	6531888	6531889	chr1_6531888_6531889_C	0	-
chr1	6531889	6531890	chr1_6531889_6531890_A	0	-
chr1	6532705	6532706	chr1_6532705_6532706_T	0	-
chr1	6535601	6535602	chr1_6535601_6535602_C	0	-
chr1	6535602	6535603	chr1_6535602_6535603_G	0	-
chr1	6535608	6535609	chr1_6535608_6535609_G	0	-
chr1	6535609	6535610	chr1_6535609_6535610_A	0	-
chr1	6535611	6535612	chr1_6535611_6535612_C	0	-
chr1	6586084	6586085	chr1_6586084_6586085_A	0	-
chr1	6586088	6586089	chr1_6586088_6586089_A	0	-
chr1	6586090	6586091	chr1_6586090_6586091_C	0	-
chr1	6586093	6586094	chr1_6586093_6586094_T	0	-
chr1	6586097	6586098	chr1_6586097_6586098_A	0	-
chr1	6586136	6586137	chr1_6586136_6586137_T	0	-
chr1	6586916	6586917	chr1_6586916_6586917_A	0	-
chr1	6589249	6589250	chr1_6589249_6589250_A	0	-
chr1	6592162	6592163	chr1_6592162_6592163_A	0	-
chr1	6592163	6592164	chr1_6592163_6592164_T	0	-
chr1	6592836	6592837	chr1_6592836_6592837_A	0	-
chr1	6592846	6592847	chr1_6592846_6592847_A	0	-
chr1	6593528	6593529	chr1_6593528_6593529_A	0	-
chr1	6602028	6602029	chr1_6602028_6602029_A	0	-
chr1	6602032	6602033	chr1_6602032_6602033_A	0	-
chr1	6605267	6605268	chr1_6605267_6605268_A	0	-
chr1	6609783	6609784	chr1_6609783_6609784_A	0	-
chr1	6646627	6646628	chr1_6646627_6646628_C	0	+
chr1	6646628	6646629	chr1_6646628_6646629_C	0	+
chr1	6646629	6646630	chr1_6646629_6646630_A	0	+
chr1	6646630	6646631	chr1_6646630_6646631_C	0	+
chr1	6646720	6646721	chr1_6646720_6646721_T	0	+
chr1	6646722	6646723	chr1_6646722_6646723_A	0	+
chr1	6647244	6647245	chr1_6647244_6647245_A	0	+
chr1	6648087	6648088	chr1_6648087_6648088_A	0	+
chr1	6648091	6648092	chr1_6648091_6648092_C	0	+
chr1	6648097	6648098	chr1_6648097_6648098_C	0	+
chr1	6648787	6648788	chr1_6648787_6648788_A	0	+
chr1	6648794	6648795	chr1_6648794_6648795_A	0	+
chr1	6655647	6655648	chr1_6655647_6655648_A	0	-
chr1	6679829	6679830	chr1_6679829_6679830_A	0	+
chr1	6679838	6679839	chr1_6679838_6679839_A	0	+
chr1	6681451	6681452	chr1_6681451_6681452_A	0	+
chr1	6681453	6681454	chr1_6681453_6681454_A	0	+
chr1	6689669	6689670	chr1_6689669_6689670_C	0	+
chr1	6690321	6690322	chr1_6690321_6690322_A	0	+
chr1	6690325	6690326	chr1_6690325_6690326_A	0	+
chr1	6692825	6692826	chr1_6692825_6692826_A	0	+
chr1	6692839	6692840	chr1_6692839_6692840_A	0	+
chr1	6692840	6692841	chr1_6692840_6692841_C	0	+
chr1	6695788	6695789	chr1_6695788_6695789_A	0	-
chr1	6695790	6695791	chr1_6695790_6695791_T	0	-
chr1	6696329	6696330	chr1_6696329_6696330_A	0	-
chr1	6697418	6697419	chr1_6697418_6697419_A	0	-
chr1	6697589	6697590	chr1_6697589_6697590_A	0	-
chr1	6698452	6698453	chr1_6698452_6698453_A	0	-
chr1	6704755	6704756	chr1_6704755_6704756_A	0	-
chr1	6704757	6704758	chr1_6704757_6704758_A	0	-
chr1	6704758	6704759	chr1_6704758_6704759_C	0	-
chr1	6705202	6705203	chr1_6705202_6705203_A	0	-
chr1	6705204	6705205	chr1_6705204_6705205_G	0	-
chr1	6705207	6705208	chr1_6705207_6705208_C	0	-
chr1	6705210	6705211	chr1_6705210_6705211_A	0	-
chr1	6705211	6705212	chr1_6705211_6705212_C	0	-
chr1	6705214	6705215	chr1_6705214_6705215_A	0	-
chr1	6705215	6705216	chr1_6705215_6705216_C	0	-
chr1	6705217	6705218	chr1_6705217_6705218_G	0	-
chr1	6705237	6705238	chr1_6705237_6705238_C	0	-
chr1	6706071	6706072	chr1_6706071_6706072_A	0	-
chr1	6711689	6711690	chr1_6711689_6711690_A	0	-
chr1	6713028	6713029	chr1_6713028_6713029_A	0	-
chr1	6713031	6713032	chr1_6713031_6713032_A	0	-
chr1	7833413	7833414	chr1_7833413_7833414_A	0	+
chr1	7833476	7833477	chr1_7833476_7833477_A	0	+
chr1	7838153	7838154	chr1_7838153_7838154_A	0	+
chr1	7838155	7838156	chr1_7838155_7838156_A	0	+
chr1	7838159	7838160	chr1_7838159_7838160_A	0	+
chr1	7844676	7844677	chr1_7844676_7844677_C	0	+
chr1	7845473	7845474	chr1_7845473_7845474_A	0	+
chr1	7848071	7848072	chr1_7848071_7848072_A	0	+
chr1	7870460	7870461	chr1_7870460_7870461_A	0	+
chr1	7895796	7895797	chr1_7895796_7895797_A	0	+
chr1	7897035	7897036	chr1_7897035_7897036_A	0	+
chr1	8044921	8044922	chr1_8044921_8044922_A	0	+
chr1	8074476	8074477	chr1_8074476_8074477_A	0	-
chr1	8415684	8415685	chr1_8415684_8415685_A	0	-
chr1	8416330	8416331	chr1_8416330_8416331_A	0	-
chr1	8418997	8418998	chr1_8418997_8418998_A	0	-
chr1	8418998	8418999	chr1_8418998_8418999_C	0	-
chr1	8421572	8421573	chr1_8421572_8421573_A	0	-
chr1	8421574	8421575	chr1_8421574_8421575_C	0	-
chr1	8421578	8421579	chr1_8421578_8421579_A	0	-
chr1	8421958	8421959	chr1_8421958_8421959_C	0	-
chr1	8421964	8421965	chr1_8421964_8421965_A	0	-
chr1	8422928	8422929	chr1_8422928_8422929_A	0	-
chr1	8424337	8424338	chr1_8424337_8424338_C	0	-
chr1	8424345	8424346	chr1_8424345_8424346_A	0	-
chr1	8482892	8482893	chr1_8482892_8482893_A	0	-
chr1	8482894	8482895	chr1_8482894_8482895_A	0	-
chr1	8921533	8921534	chr1_8921533_8921534_A	0	-
chr1	8921534	8921535	chr1_8921534_8921535_G	0	-
chr1	8921535	8921536	chr1_8921535_8921536_T	0	-
chr1	8923024	8923025	chr1_8923024_8923025_A	0	-
chr1	8923025	8923026	chr1_8923025_8923026_A	0	-
chr1	8923026	8923027	chr1_8923026_8923027_A	0	-
chr1	8923030	8923031	chr1_8923030_8923031_A	0	-
chr1	8923033	8923034	chr1_8923033_8923034_T	0	-
chr1	8923402	8923403	chr1_8923402_8923403_G	0	-
chr1	8923426	8923427	chr1_8923426_8923427_A	0	-
chr1	8923427	8923428	chr1_8923427_8923428_C	0	-
chr1	8923431	8923432	chr1_8923431_8923432_A	0	-
chr1	8924172	8924173	chr1_8924172_8924173_A	0	-
chr1	8924176	8924177	chr1_8924176_8924177_A	0	-
chr1	8924178	8924179	chr1_8924178_8924179_T	0	-
chr1	8925555	8925556	chr1_8925555_8925556_A	0	-
chr1	8925565	8925566	chr1_8925565_8925566_A	0	-
chr1	8925566	8925567	chr1_8925566_8925567_A	0	-
chr1	8925567	8925568	chr1_8925567_8925568_A	0	-
chr1	8925600	8925601	chr1_8925600_8925601_A	0	-
chr1	8926584	8926585	chr1_8926584_8926585_T	0	-
chr1	8926585	8926586	chr1_8926585_8926586_A	0	-
chr1	8926586	8926587	chr1_8926586_8926587_C	0	-
chr1	8926595	8926596	chr1_8926595_8926596_A	0	-
chr1	8927332	8927333	chr1_8927332_8927333_C	0	-
chr1	8927335	8927336	chr1_8927335_8927336_A	0	-
chr1	8927336	8927337	chr1_8927336_8927337_C	0	-
chr1	8927337	8927338	chr1_8927337_8927338_T	0	-
chr1	8927340	8927341	chr1_8927340_8927341_A	0	-
chr1	8927342	8927343	chr1_8927342_8927343_T	0	-
chr1	8927355	8927356	chr1_8927355_8927356_G	0	-
chr1	8928136	8928137	chr1_8928136_8928137_A	0	-
chr1	8928143	8928144	chr1_8928143_8928144_A	0	-
chr1	8928144	8928145	chr1_8928144_8928145_A	0	-
chr1	8930587	8930588	chr1_8930587_8930588_A	0	-
chr1	8930592	8930593	chr1_8930592_8930593_A	0	-
chr1	8932070	8932071	chr1_8932070_8932071_A	0	-
chr1	8932077	8932078	chr1_8932077_8932078_A	0	-
chr1	8935008	8935009	chr1_8935008_8935009_A	0	-
chr1	9164714	9164715	chr1_9164714_9164715_A	0	-
chr1	9306999	9307000	chr1_9306999_9307000_A	0	+
chr1	9323542	9323543	chr1_9323542_9323543_A	0	+
chr1	9642328	9642329	chr1_9642328_9642329_C	0	+
chr1	9656891	9656892	chr1_9656891_9656892_C	0	+
chr1	9662105	9662106	chr1_9662105_9662106_A	0	+
chr1	9667575	9667576	chr1_9667575_9667576_T	0	+
chr1	9670538	9670539	chr1_9670538_9670539_A	0	+
chr1	9673023	9673024	chr1_9673023_9673024_A	0	+
chr1	9777569	9777570	chr1_9777569_9777570_A	0	+
chr1	9780653	9780654	chr1_9780653_9780654_A	0	+
chr1	9783995	9783996	chr1_9783995_9783996_A	0	+
chr1	9790788	9790789	chr1_9790788_9790789_A	0	-
chr1	9791467	9791468	chr1_9791467_9791468_G	0	-
chr1	9791472	9791473	chr1_9791472_9791473_A	0	-
chr1	9791473	9791474	chr1_9791473_9791474_C	0	-
chr1	9791475	9791476	chr1_9791475_9791476_C	0	-
chr1	9791477	9791478	chr1_9791477_9791478_C	0	-
chr1	9791479	9791480	chr1_9791479_9791480_A	0	-
chr1	9791979	9791980	chr1_9791979_9791980_A	0	-
chr1	9791981	9791982	chr1_9791981_9791982_C	0	-
chr1	9793640	9793641	chr1_9793640_9793641_A	0	-
chr1	9794227	9794228	chr1_9794227_9794228_A	0	-
chr1	9794228	9794229	chr1_9794228_9794229_T	0	-
chr1	9795250	9795251	chr1_9795250_9795251_C	0	-
chr1	9795258	9795259	chr1_9795258_9795259_T	0	-
chr1	9795700	9795701	chr1_9795700_9795701_C	0	-
chr1	9795701	9795702	chr1_9795701_9795702_T	0	-
chr1	9795706	9795707	chr1_9795706_9795707_A	0	-
chr1	9795707	9795708	chr1_9795707_9795708_T	0	-
chr1	9795708	9795709	chr1_9795708_9795709_T	0	-
chr1	9795709	9795710	chr1_9795709_9795710_C	0	-
chr1	9795713	9795714	chr1_9795713_9795714_C	0	-
chr1	9796127	9796128	chr1_9796127_9796128_A	0	-
chr1	9801343	9801344	chr1_9801343_9801344_A	0	-
chr1	9804081	9804082	chr1_9804081_9804082_A	0	-
chr1	9804082	9804083	chr1_9804082_9804083_C	0	-
chr1	9804085	9804086	chr1_9804085_9804086_A	0	-
chr1	9804090	9804091	chr1_9804090_9804091_A	0	-
chr1	9804720	9804721	chr1_9804720_9804721_A	0	-
chr1	9809994	9809995	chr1_9809994_9809995_A	0	-
chr1	9811774	9811775	chr1_9811774_9811775_A	0	-
chr1	9992056	9992057	chr1_9992056_9992057_A	0	-
chr1	9992983	9992984	chr1_9992983_9992984_A	0	-
chr1	9994942	9994943	chr1_9994942_9994943_A	0	-
chr1	9996720	9996721	chr1_9996720_9996721_A	0	-
chr1	10002866	10002867	chr1_10002866_10002867_A	0	-
chr1	10002883	10002884	chr1_10002883_10002884_A	0	-
chr1	10035629	10035630	chr1_10035629_10035630_A	0	+
chr1	10155494	10155495	chr1_10155494_10155495_A	0	+
chr1	10165540	10165541	chr1_10165540_10165541_T	0	+
chr1	10165544	10165545	chr1_10165544_10165545_A	0	+
chr1	10179549	10179550	chr1_10179549_10179550_A	0	+
chr1	10181991	10181992	chr1_10181991_10181992_A	0	+
chr1	10197100	10197101	chr1_10197100_10197101_A	0	+
chr1	10206984	10206985	chr1_10206984_10206985_A	0	+
chr1	10211347	10211348	chr1_10211347_10211348_A	0	+
chr1	10218389	10218390	chr1_10218389_10218390_A	0	+
chr1	10239916	10239917	chr1_10239916_10239917_T	0	+
chr1	10239928	10239929	chr1_10239928_10239929_A	0	+
chr1	10239933	10239934	chr1_10239933_10239934_C	0	+
chr1	10316269	10316270	chr1_10316269_10316270_A	0	+
chr1	10316277	10316278	chr1_10316277_10316278_A	0	+
chr1	10332267	10332268	chr1_10332267_10332268_A	0	+
chr1	10332270	10332271	chr1_10332270_10332271_A	0	+
chr1	10332284	10332285	chr1_10332284_10332285_G	0	+
chr1	10338014	10338015	chr1_10338014_10338015_A	0	+
chr1	10397101	10397102	chr1_10397101_10397102_A	0	+
chr1	10412663	10412664	chr1_10412663_10412664_C	0	+
chr1	10421722	10421723	chr1_10421722_10421723_A	0	+
chr1	10435281	10435282	chr1_10435281_10435282_A	0	+
chr1	10459652	10459653	chr1_10459652_10459653_A	0	+
chr1	10460430	10460431	chr1_10460430_10460431_A	0	+
chr1	10473088	10473089	chr1_10473088_10473089_A	0	+
chr1	10477407	10477408	chr1_10477407_10477408_A	0	+
chr1	10477410	10477411	chr1_10477410_10477411_A	0	+
chr1	10479445	10479446	chr1_10479445_10479446_A	0	+
chr1	10479446	10479447	chr1_10479446_10479447_A	0	+
chr1	10521781	10521782	chr1_10521781_10521782_A	0	-
chr1	10523291	10523292	chr1_10523291_10523292_A	0	-
chr1	10523293	10523294	chr1_10523293_10523294_T	0	-
chr1	10523299	10523300	chr1_10523299_10523300_C	0	-
chr1	10527414	10527415	chr1_10527414_10527415_G	0	-
chr1	10689559	10689560	chr1_10689559_10689560_C	0	+
chr1	10689561	10689562	chr1_10689561_10689562_A	0	+
chr1	10703082	10703083	chr1_10703082_10703083_C	0	-
chr1	10703392	10703393	chr1_10703392_10703393_A	0	-
chr1	10708218	10708219	chr1_10708218_10708219_A	0	-
chr1	11073734	11073735	chr1_11073734_11073735_A	0	+
chr1	11073749	11073750	chr1_11073749_11073750_A	0	+
chr1	11073753	11073754	chr1_11073753_11073754_A	0	+
chr1	11076873	11076874	chr1_11076873_11076874_T	0	+
chr1	11078764	11078765	chr1_11078764_11078765_A	0	+
chr1	11082146	11082147	chr1_11082146_11082147_A	0	+
chr1	11082147	11082148	chr1_11082147_11082148_A	0	+
chr1	11116176	11116177	chr1_11116176_11116177_A	0	-
chr1	11116178	11116179	chr1_11116178_11116179_T	0	-
chr1	11116841	11116842	chr1_11116841_11116842_C	0	-
chr1	11116842	11116843	chr1_11116842_11116843_C	0	-
chr1	11118967	11118968	chr1_11118967_11118968_G	0	-
chr1	11119420	11119421	chr1_11119420_11119421_A	0	-
chr1	11126829	11126830	chr1_11126829_11126830_A	0	-
chr1	11128172	11128173	chr1_11128172_11128173_C	0	-
chr1	11129830	11129831	chr1_11129830_11129831_A	0	-
chr1	11132270	11132271	chr1_11132270_11132271_T	0	-
chr1	11134087	11134088	chr1_11134087_11134088_A	0	-
chr1	11134150	11134151	chr1_11134150_11134151_C	0	-
chr1	11134406	11134407	chr1_11134406_11134407_A	0	-
chr1	11134407	11134408	chr1_11134407_11134408_G	0	-
chr1	11134410	11134411	chr1_11134410_11134411_A	0	-
chr1	11137021	11137022	chr1_11137021_11137022_A	0	-
chr1	11137029	11137030	chr1_11137029_11137030_A	0	-
chr1	11139901	11139902	chr1_11139901_11139902_A	0	-
chr1	11139907	11139908	chr1_11139907_11139908_A	0	-
chr1	11139913	11139914	chr1_11139913_11139914_A	0	-
chr1	11140680	11140681	chr1_11140680_11140681_A	0	-
chr1	11142956	11142957	chr1_11142956_11142957_A	0	-
chr1	11147694	11147695	chr1_11147694_11147695_A	0	-
chr1	11147981	11147982	chr1_11147981_11147982_A	0	-
chr1	11147982	11147983	chr1_11147982_11147983_T	0	-
chr1	11147984	11147985	chr1_11147984_11147985_A	0	-
chr1	11150738	11150739	chr1_11150738_11150739_G	0	-
chr1	11150755	11150756	chr1_11150755_11150756_A	0	-
chr1	11150798	11150799	chr1_11150798_11150799_A	0	-
chr1	11151261	11151262	chr1_11151261_11151262_A	0	-
chr1	11155961	11155962	chr1_11155961_11155962_T	0	-
chr1	11169455	11169456	chr1_11169455_11169456_A	0	-
chr1	11174530	11174531	chr1_11174530_11174531_G	0	-
chr1	11174531	11174532	chr1_11174531_11174532_A	0	-
chr1	11174532	11174533	chr1_11174532_11174533_G	0	-
chr1	11174533	11174534	chr1_11174533_11174534_T	0	-
chr1	11174973	11174974	chr1_11174973_11174974_A	0	-
chr1	11174975	11174976	chr1_11174975_11174976_T	0	-
chr1	11181445	11181446	chr1_11181445_11181446_A	0	-
chr1	11181451	11181452	chr1_11181451_11181452_T	0	-
chr1	11184712	11184713	chr1_11184712_11184713_A	0	-
chr1	11187899	11187900	chr1_11187899_11187900_A	0	-
chr1	11187901	11187902	chr1_11187901_11187902_T	0	-
chr1	11188208	11188209	chr1_11188208_11188209_A	0	-
chr1	11188210	11188211	chr1_11188210_11188211_A	0	-
chr1	11188211	11188212	chr1_11188211_11188212_T	0	-
chr1	11188632	11188633	chr1_11188632_11188633_A	0	-
chr1	11189028	11189029	chr1_11189028_11189029_A	0	-
chr1	11189039	11189040	chr1_11189039_11189040_A	0	-
chr1	11189914	11189915	chr1_11189914_11189915_A	0	-
chr1	11193279	11193280	chr1_11193279_11193280_A	0	-
chr1	11193280	11193281	chr1_11193280_11193281_C	0	-
chr1	11210305	11210306	chr1_11210305_11210306_A	0	-
chr1	11269532	11269533	chr1_11269532_11269533_A	0	-
chr1	11269543	11269544	chr1_11269543_11269544_A	0	-
chr1	11270996	11270997	chr1_11270996_11270997_G	0	-
chr1	11272549	11272550	chr1_11272549_11272550_A	0	-
chr1	11272965	11272966	chr1_11272965_11272966_G	0	-
chr1	11272992	11272993	chr1_11272992_11272993_A	0	-
chr1	11272993	11272994	chr1_11272993_11272994_C	0	-
chr1	11291148	11291149	chr1_11291148_11291149_A	0	-
chr1	11291149	11291150	chr1_11291149_11291150_G	0	-
chr1	11292607	11292608	chr1_11292607_11292608_C	0	-
chr1	11298703	11298704	chr1_11298703_11298704_A	0	-
chr1	11300628	11300629	chr1_11300628_11300629_A	0	-
chr1	11301760	11301761	chr1_11301760_11301761_A	0	-
chr1	11314056	11314057	chr1_11314056_11314057_A	0	-
chr1	11317253	11317254	chr1_11317253_11317254_A	0	-
chr1	11318668	11318669	chr1_11318668_11318669_A	0	-
chr1	11318670	11318671	chr1_11318670_11318671_T	0	-
chr1	11722654	11722655	chr1_11722654_11722655_C	0	+
chr1	11722657	11722658	chr1_11722657_11722658_C	0	+
chr1	11733306	11733307	chr1_11733306_11733307_A	0	+
chr1	11735810	11735811	chr1_11735810_11735811_C	0	-
chr1	11735815	11735816	chr1_11735815_11735816_A	0	-
chr1	11736222	11736223	chr1_11736222_11736223_A	0	-
chr1	11851011	11851012	chr1_11851011_11851012_A	0	-
chr1	11851012	11851013	chr1_11851012_11851013_A	0	-
chr1	11854159	11854160	chr1_11854159_11854160_A	0	-
chr1	11854164	11854165	chr1_11854164_11854165_A	0	-
chr1	11855425	11855426	chr1_11855425_11855426_A	0	-
chr1	11856478	11856479	chr1_11856478_11856479_C	0	-
chr1	11860400	11860401	chr1_11860400_11860401_A	0	-
chr1	11860403	11860404	chr1_11860403_11860404_A	0	-
chr1	11863204	11863205	chr1_11863204_11863205_C	0	-
chr1	11863205	11863206	chr1_11863205_11863206_C	0	-
chr1	11863207	11863208	chr1_11863207_11863208_C	0	-
chr1	11867150	11867151	chr1_11867150_11867151_A	0	+
chr1	11867154	11867155	chr1_11867154_11867155_A	0	+
chr1	11876644	11876645	chr1_11876644_11876645_T	0	+
chr1	11879526	11879527	chr1_11879526_11879527_A	0	+
chr1	11883732	11883733	chr1_11883732_11883733_A	0	+
chr1	11883734	11883735	chr1_11883734_11883735_T	0	+
chr1	11883735	11883736	chr1_11883735_11883736_T	0	+
chr1	11884506	11884507	chr1_11884506_11884507_A	0	+
chr1	11887121	11887122	chr1_11887121_11887122_A	0	+
chr1	11887122	11887123	chr1_11887122_11887123_A	0	+
chr1	11888126	11888127	chr1_11888126_11888127_C	0	+
chr1	11888127	11888128	chr1_11888127_11888128_C	0	+
chr1	11889229	11889230	chr1_11889229_11889230_A	0	+
chr1	11889230	11889231	chr1_11889230_11889231_A	0	+
chr1	11893902	11893903	chr1_11893902_11893903_A	0	+
chr1	11893912	11893913	chr1_11893912_11893913_A	0	+
chr1	11895991	11895992	chr1_11895991_11895992_A	0	+
chr1	11897028	11897029	chr1_11897028_11897029_A	0	+
chr1	11897031	11897032	chr1_11897031_11897032_A	0	+
chr1	11897376	11897377	chr1_11897376_11897377_A	0	+
chr1	11900175	11900176	chr1_11900175_11900176_A	0	+
chr1	11980412	11980413	chr1_11980412_11980413_A	0	-
chr1	11980416	11980417	chr1_11980416_11980417_A	0	-
chr1	12010371	12010372	chr1_12010371_12010372_T	0	+
chr1	12010373	12010374	chr1_12010373_12010374_A	0	+
chr1	12014862	12014863	chr1_12014862_12014863_A	0	+
chr1	12016940	12016941	chr1_12016940_12016941_A	0	+
chr1	12016952	12016953	chr1_12016952_12016953_A	0	+
chr1	12020668	12020669	chr1_12020668_12020669_A	0	+
chr1	12023526	12023527	chr1_12023526_12023527_T	0	+
chr1	12023563	12023564	chr1_12023563_12023564_T	0	+
chr1	12023565	12023566	chr1_12023565_12023566_A	0	+
chr1	12026272	12026273	chr1_12026272_12026273_G	0	+
chr1	12027023	12027024	chr1_12027023_12027024_T	0	+
chr1	12041968	12041969	chr1_12041968_12041969_A	0	+
chr1	12057317	12057318	chr1_12057317_12057318_C	0	+
chr1	12057323	12057324	chr1_12057323_12057324_A	0	+
chr1	12058791	12058792	chr1_12058791_12058792_T	0	+
chr1	12058793	12058794	chr1_12058793_12058794_C	0	+
chr1	12058794	12058795	chr1_12058794_12058795_C	0	+
chr1	12058795	12058796	chr1_12058795_12058796_T	0	+
chr1	12058797	12058798	chr1_12058797_12058798_A	0	+
chr1	12061425	12061426	chr1_12061425_12061426_A	0	+
chr1	12061429	12061430	chr1_12061429_12061430_A	0	+
chr1	12061805	12061806	chr1_12061805_12061806_A	0	+
chr1	12062011	12062012	chr1_12062011_12062012_C	0	+
chr1	12062013	12062014	chr1_12062013_12062014_C	0	+
chr1	12062014	12062015	chr1_12062014_12062015_C	0	+
chr1	12062017	12062018	chr1_12062017_12062018_C	0	+
chr1	12064538	12064539	chr1_12064538_12064539_T	0	+
chr1	12064539	12064540	chr1_12064539_12064540_T	0	+
chr1	12064540	12064541	chr1_12064540_12064541_A	0	+
chr1	12064859	12064860	chr1_12064859_12064860_A	0	+
chr1	12065733	12065734	chr1_12065733_12065734_T	0	+
chr1	12065735	12065736	chr1_12065735_12065736_A	0	+
chr1	12065737	12065738	chr1_12065737_12065738_A	0	+
chr1	12066569	12066570	chr1_12066569_12066570_A	0	+
chr1	12067087	12067088	chr1_12067087_12067088_A	0	+
chr1	12067093	12067094	chr1_12067093_12067094_A	0	+
chr1	12069620	12069621	chr1_12069620_12069621_A	0	+
chr1	12082132	12082133	chr1_12082132_12082133_A	0	+
chr1	12082858	12082859	chr1_12082858_12082859_A	0	+
chr1	12089794	12089795	chr1_12089794_12089795_A	0	+
chr1	12089796	12089797	chr1_12089796_12089797_C	0	+
chr1	12089797	12089798	chr1_12089797_12089798_T	0	+
chr1	12090052	12090053	chr1_12090052_12090053_C	0	+
chr1	12091761	12091762	chr1_12091761_12091762_C	0	+
chr1	12304277	12304278	chr1_12304277_12304278_A	0	+
chr1	12317955	12317956	chr1_12317955_12317956_T	0	+
chr1	12327811	12327812	chr1_12327811_12327812_A	0	+
chr1	12378090	12378091	chr1_12378090_12378091_T	0	+
chr1	12379534	12379535	chr1_12379534_12379535_A	0	+
chr1	12383733	12383734	chr1_12383733_12383734_A	0	+
chr1	12393252	12393253	chr1_12393252_12393253_A	0	+
chr1	12395736	12395737	chr1_12395736_12395737_A	0	+
chr1	12402927	12402928	chr1_12402927_12402928_A	0	+
chr1	12402929	12402930	chr1_12402929_12402930_G	0	+
chr1	12406635	12406636	chr1_12406635_12406636_A	0	+
chr1	12409201	12409202	chr1_12409201_12409202_A	0	+
chr1	12416427	12416428	chr1_12416427_12416428_A	0	+
chr1	12416431	12416432	chr1_12416431_12416432_A	0	+
chr1	12416432	12416433	chr1_12416432_12416433_A	0	+
chr1	12416437	12416438	chr1_12416437_12416438_T	0	+
chr1	12428495	12428496	chr1_12428495_12428496_A	0	+
chr1	12429483	12429484	chr1_12429483_12429484_A	0	+
chr1	12438438	12438439	chr1_12438438_12438439_C	0	+
chr1	12445280	12445281	chr1_12445280_12445281_A	0	+
chr1	12445288	12445289	chr1_12445288_12445289_A	0	+
chr1	12445292	12445293	chr1_12445292_12445293_T	0	+
chr1	12463858	12463859	chr1_12463858_12463859_A	0	+
chr1	12520231	12520232	chr1_12520231_12520232_A	0	+
chr1	12568927	12568928	chr1_12568927_12568928_A	0	+
chr1	12632897	12632898	chr1_12632897_12632898_T	0	-
chr1	12632903	12632904	chr1_12632903_12632904_A	0	-
chr1	12639002	12639003	chr1_12639002_12639003_A	0	-
chr1	12639468	12639469	chr1_12639468_12639469_A	0	-
chr1	13942379	13942380	chr1_13942379_13942380_A	0	+
chr1	14112985	14112986	chr1_14112985_14112986_A	0	+
chr1	15753615	15753616	chr1_15753615_15753616_T	0	+
chr1	15753617	15753618	chr1_15753617_15753618_A	0	+
chr1	15755062	15755063	chr1_15755062_15755063_A	0	+
chr1	15819558	15819559	chr1_15819558_15819559_A	0	-
chr1	15831274	15831275	chr1_15831274_15831275_A	0	-
chr1	15831275	15831276	chr1_15831275_15831276_A	0	-
chr1	15833591	15833592	chr1_15833591_15833592_A	0	-
chr1	15833602	15833603	chr1_15833602_15833603_A	0	-
chr1	15860707	15860708	chr1_15860707_15860708_A	0	+
chr1	15862949	15862950	chr1_15862949_15862950_A	0	+
chr1	15892389	15892390	chr1_15892389_15892390_A	0	+
chr1	15893570	15893571	chr1_15893570_15893571_A	0	+
chr1	15893571	15893572	chr1_15893571_15893572_A	0	+
chr1	15894246	15894247	chr1_15894246_15894247_A	0	+
chr1	15894253	15894254	chr1_15894253_15894254_A	0	+
chr1	15904381	15904382	chr1_15904381_15904382_A	0	-
chr1	15953134	15953135	chr1_15953134_15953135_A	0	+
chr1	15960267	15960268	chr1_15960267_15960268_A	0	+
chr1	15978125	15978126	chr1_15978125_15978126_A	0	+
chr1	15978160	15978161	chr1_15978160_15978161_T	0	+
chr1	15983075	15983076	chr1_15983075_15983076_A	0	+
chr1	15986296	15986297	chr1_15986296_15986297_A	0	+
chr1	16043179	16043180	chr1_16043179_16043180_A	0	+
chr1	16044356	16044357	chr1_16044356_16044357_T	0	+
chr1	16044365	16044366	chr1_16044365_16044366_T	0	+
chr1	16044366	16044367	chr1_16044366_16044367_T	0	+
chr1	16044367	16044368	chr1_16044367_16044368_A	0	+
chr1	16044368	16044369	chr1_16044368_16044369_C	0	+
chr1	16044369	16044370	chr1_16044369_16044370_T	0	+
chr1	16044370	16044371	chr1_16044370_16044371_C	0	+
chr1	16044371	16044372	chr1_16044371_16044372_C	0	+
chr1	16045005	16045006	chr1_16045005_16045006_A	0	+
chr1	16045007	16045008	chr1_16045007_16045008_C	0	+
chr1	16045008	16045009	chr1_16045008_16045009_A	0	+
chr1	16046200	16046201	chr1_16046200_16046201_A	0	+
chr1	16053481	16053482	chr1_16053481_16053482_A	0	+
chr1	16054463	16054464	chr1_16054463_16054464_T	0	+
chr1	16054538	16054539	chr1_16054538_16054539_C	0	+
chr1	16054542	16054543	chr1_16054542_16054543_A	0	+
chr1	16055137	16055138	chr1_16055137_16055138_A	0	+
chr1	16055572	16055573	chr1_16055572_16055573_A	0	+
chr1	16055577	16055578	chr1_16055577_16055578_A	0	+
chr1	16056266	16056267	chr1_16056266_16056267_A	0	+
chr1	16056990	16056991	chr1_16056990_16056991_T	0	+
chr1	16056991	16056992	chr1_16056991_16056992_A	0	+
chr1	16057660	16057661	chr1_16057660_16057661_A	0	+
chr1	16058339	16058340	chr1_16058339_16058340_C	0	+
chr1	16058340	16058341	chr1_16058340_16058341_C	0	+
chr1	16058346	16058347	chr1_16058346_16058347_C	0	+
chr1	16058348	16058349	chr1_16058348_16058349_C	0	+
chr1	16058354	16058355	chr1_16058354_16058355_T	0	+
chr1	16058355	16058356	chr1_16058355_16058356_C	0	+
chr1	16058357	16058358	chr1_16058357_16058358_C	0	+
chr1	16058363	16058364	chr1_16058363_16058364_A	0	+
chr1	16058812	16058813	chr1_16058812_16058813_C	0	+
chr1	16058819	16058820	chr1_16058819_16058820_T	0	+
chr1	16060249	16060250	chr1_16060249_16060250_C	0	+
chr1	16060250	16060251	chr1_16060250_16060251_C	0	+
chr1	16060264	16060265	chr1_16060264_16060265_A	0	+
chr1	16065069	16065070	chr1_16065069_16065070_A	0	+
chr1	16094999	16095000	chr1_16094999_16095000_A	0	+
chr1	16095003	16095004	chr1_16095003_16095004_C	0	+
chr1	16096878	16096879	chr1_16096878_16096879_A	0	+
chr1	16096882	16096883	chr1_16096882_16096883_C	0	+
chr1	16202666	16202667	chr1_16202666_16202667_A	0	+
chr1	16237568	16237569	chr1_16237568_16237569_A	0	+
chr1	16245396	16245397	chr1_16245396_16245397_A	0	+
chr1	16245871	16245872	chr1_16245871_16245872_A	0	+
chr1	16245872	16245873	chr1_16245872_16245873_A	0	+
chr1	16247335	16247336	chr1_16247335_16247336_T	0	+
chr1	16247336	16247337	chr1_16247336_16247337_A	0	+
chr1	16247359	16247360	chr1_16247359_16247360_T	0	+
chr1	16248716	16248717	chr1_16248716_16248717_A	0	+
chr1	16263622	16263623	chr1_16263622_16263623_T	0	+
chr1	16263624	16263625	chr1_16263624_16263625_A	0	+
chr1	16265188	16265189	chr1_16265188_16265189_A	0	+
chr1	16265757	16265758	chr1_16265757_16265758_A	0	+
chr1	16265765	16265766	chr1_16265765_16265766_A	0	+
chr1	16265766	16265767	chr1_16265766_16265767_C	0	+
chr1	16265782	16265783	chr1_16265782_16265783_G	0	+
chr1	16269255	16269256	chr1_16269255_16269256_A	0	-
chr1	16270407	16270408	chr1_16270407_16270408_A	0	-
chr1	16271718	16271719	chr1_16271718_16271719_A	0	-
chr1	16272358	16272359	chr1_16272358_16272359_G	0	-
chr1	16272359	16272360	chr1_16272359_16272360_A	0	-
chr1	16272364	16272365	chr1_16272364_16272365_A	0	-
chr1	16273639	16273640	chr1_16273639_16273640_A	0	-
chr1	16273640	16273641	chr1_16273640_16273641_G	0	-
chr1	16343720	16343721	chr1_16343720_16343721_A	0	-
chr1	16343742	16343743	chr1_16343742_16343743_A	0	-
chr1	16456085	16456086	chr1_16456085_16456086_A	0	-
chr1	16456106	16456107	chr1_16456106_16456107_A	0	-
chr1	16456107	16456108	chr1_16456107_16456108_C	0	-
chr1	16456931	16456932	chr1_16456931_16456932_A	0	-
chr1	16456943	16456944	chr1_16456943_16456944_A	0	-
chr1	16456944	16456945	chr1_16456944_16456945_A	0	-
chr1	16460122	16460123	chr1_16460122_16460123_A	0	-
chr1	16460426	16460427	chr1_16460426_16460427_C	0	-
chr1	16460446	16460447	chr1_16460446_16460447_A	0	-
chr1	16460448	16460449	chr1_16460448_16460449_T	0	-
chr1	16461080	16461081	chr1_16461080_16461081_A	0	-
chr1	16461083	16461084	chr1_16461083_16461084_A	0	-
chr1	16461717	16461718	chr1_16461717_16461718_A	0	-
chr1	16477482	16477483	chr1_16477482_16477483_A	0	-
chr1	16528373	16528374	chr1_16528373_16528374_A	0	-
chr1	16532187	16532188	chr1_16532187_16532188_A	0	-
chr1	16532600	16532601	chr1_16532600_16532601_C	0	-
chr1	16559178	16559179	chr1_16559178_16559179_A	0	-
chr1	16578299	16578300	chr1_16578299_16578300_A	0	-
chr1	16578300	16578301	chr1_16578300_16578301_C	0	-
chr1	16578302	16578303	chr1_16578302_16578303_A	0	-
chr1	16578308	16578309	chr1_16578308_16578309_A	0	-
chr1	16578929	16578930	chr1_16578929_16578930_T	0	-
chr1	16719699	16719700	chr1_16719699_16719700_A	0	+
chr1	16721499	16721500	chr1_16721499_16721500_C	0	+
chr1	16721503	16721504	chr1_16721503_16721504_A	0	+
chr1	16767635	16767636	chr1_16767635_16767636_G	0	+
chr1	16767636	16767637	chr1_16767636_16767637_A	0	+
chr1	16767641	16767642	chr1_16767641_16767642_A	0	+
chr1	16770106	16770107	chr1_16770106_16770107_A	0	+
chr1	16775552	16775553	chr1_16775552_16775553_C	0	+
chr1	16775560	16775561	chr1_16775560_16775561_A	0	+
chr1	16776500	16776501	chr1_16776500_16776501_T	0	+
chr1	16782257	16782258	chr1_16782257_16782258_T	0	+
chr1	16785301	16785302	chr1_16785301_16785302_G	0	+
chr1	16785302	16785303	chr1_16785302_16785303_A	0	+
chr1	16890700	16890701	chr1_16890700_16890701_A	0	-
chr1	16890704	16890705	chr1_16890704_16890705_C	0	-
chr1	16891416	16891417	chr1_16891416_16891417_G	0	-
chr1	16891418	16891419	chr1_16891418_16891419_T	0	-
chr1	16891443	16891444	chr1_16891443_16891444_A	0	-
chr1	16891444	16891445	chr1_16891444_16891445_A	0	-
chr1	16891445	16891446	chr1_16891445_16891446_T	0	-
chr1	16891449	16891450	chr1_16891449_16891450_A	0	-
chr1	16892326	16892327	chr1_16892326_16892327_A	0	-
chr1	16892327	16892328	chr1_16892327_16892328_T	0	-
chr1	16892982	16892983	chr1_16892982_16892983_A	0	-
chr1	16892984	16892985	chr1_16892984_16892985_A	0	-
chr1	16892985	16892986	chr1_16892985_16892986_A	0	-
chr1	16892986	16892987	chr1_16892986_16892987_T	0	-
chr1	16893004	16893005	chr1_16893004_16893005_T	0	-
chr1	16893872	16893873	chr1_16893872_16893873_A	0	-
chr1	16894551	16894552	chr1_16894551_16894552_A	0	-
chr1	16894552	16894553	chr1_16894552_16894553_A	0	-
chr1	16894556	16894557	chr1_16894556_16894557_A	0	-
chr1	16894557	16894558	chr1_16894557_16894558_A	0	-
chr1	16895766	16895767	chr1_16895766_16895767_A	0	-
chr1	16901221	16901222	chr1_16901221_16901222_A	0	-
chr1	16901222	16901223	chr1_16901222_16901223_A	0	-
chr1	16901225	16901226	chr1_16901225_16901226_T	0	-
chr1	16901230	16901231	chr1_16901230_16901231_C	0	-
chr1	16903002	16903003	chr1_16903002_16903003_T	0	-
chr1	16903939	16903940	chr1_16903939_16903940_A	0	-
chr1	16907479	16907480	chr1_16907479_16907480_T	0	-
chr1	16907485	16907486	chr1_16907485_16907486_A	0	-
chr1	16907491	16907492	chr1_16907491_16907492_T	0	-
chr1	16907494	16907495	chr1_16907494_16907495_C	0	-
chr1	16907495	16907496	chr1_16907495_16907496_T	0	-
chr1	16907510	16907511	chr1_16907510_16907511_C	0	-
chr1	16908010	16908011	chr1_16908010_16908011_T	0	-
chr1	16909278	16909279	chr1_16909278_16909279_A	0	-
chr1	16910192	16910193	chr1_16910192_16910193_A	0	-
chr1	16910216	16910217	chr1_16910216_16910217_A	0	-
chr1	16913790	16913791	chr1_16913790_16913791_A	0	-
chr1	16914318	16914319	chr1_16914318_16914319_A	0	-
chr1	16915583	16915584	chr1_16915583_16915584_A	0	-
chr1	16934217	16934218	chr1_16934217_16934218_T	0	-
chr1	16945602	16945603	chr1_16945602_16945603_C	0	-
chr1	16945625	16945626	chr1_16945625_16945626_A	0	-
chr1	16945632	16945633	chr1_16945632_16945633_A	0	-
chr1	16953026	16953027	chr1_16953026_16953027_C	0	-
chr1	16953122	16953123	chr1_16953122_16953123_A	0	-
chr1	16953123	16953124	chr1_16953123_16953124_C	0	-
chr1	16953806	16953807	chr1_16953806_16953807_C	0	-
chr1	16953814	16953815	chr1_16953814_16953815_A	0	-
chr1	16955164	16955165	chr1_16955164_16955165_C	0	-
chr1	16955165	16955166	chr1_16955165_16955166_C	0	-
chr1	16958138	16958139	chr1_16958138_16958139_A	0	-
chr1	16969659	16969660	chr1_16969659_16969660_A	0	-
chr1	16969662	16969663	chr1_16969662_16969663_G	0	-
chr1	17271923	17271924	chr1_17271923_17271924_A	0	+
chr1	17271933	17271934	chr1_17271933_17271934_C	0	+
chr1	17271936	17271937	chr1_17271936_17271937_A	0	+
chr1	17272696	17272697	chr1_17272696_17272697_C	0	+
chr1	17272729	17272730	chr1_17272729_17272730_A	0	+
chr1	17281209	17281210	chr1_17281209_17281210_A	0	+
chr1	17281780	17281781	chr1_17281780_17281781_C	0	+
chr1	17282466	17282467	chr1_17282466_17282467_A	0	+
chr1	17287236	17287237	chr1_17287236_17287237_C	0	+
chr1	17292880	17292881	chr1_17292880_17292881_A	0	+
chr1	17295575	17295576	chr1_17295575_17295576_A	0	+
chr1	17296260	17296261	chr1_17296260_17296261_A	0	+
chr1	17296718	17296719	chr1_17296718_17296719_A	0	+
chr1	17297110	17297111	chr1_17297110_17297111_C	0	+
chr1	17297939	17297940	chr1_17297939_17297940_A	0	+
chr1	17298834	17298835	chr1_17298834_17298835_A	0	+
chr1	17303075	17303076	chr1_17303075_17303076_C	0	-
chr1	17318644	17318645	chr1_17318644_17318645_A	0	-
chr1	17345473	17345474	chr1_17345473_17345474_A	0	-
chr1	17350590	17350591	chr1_17350590_17350591_C	0	-
chr1	17350594	17350595	chr1_17350594_17350595_C	0	-
chr1	17354402	17354403	chr1_17354402_17354403_A	0	-
chr1	17359672	17359673	chr1_17359672_17359673_A	0	-
chr1	17607140	17607141	chr1_17607140_17607141_A	0	+
chr1	17735705	17735706	chr1_17735705_17735706_T	0	-
chr1	17735710	17735711	chr1_17735710_17735711_A	0	-
chr1	17735713	17735714	chr1_17735713_17735714_C	0	-
chr1	17735716	17735717	chr1_17735716_17735717_A	0	-
chr1	17738706	17738707	chr1_17738706_17738707_A	0	-
chr1	17738708	17738709	chr1_17738708_17738709_A	0	-
chr1	17738709	17738710	chr1_17738709_17738710_G	0	-
chr1	17739695	17739696	chr1_17739695_17739696_A	0	-
chr1	17739703	17739704	chr1_17739703_17739704_A	0	-
chr1	17747341	17747342	chr1_17747341_17747342_C	0	-
chr1	17748804	17748805	chr1_17748804_17748805_A	0	-
chr1	17748806	17748807	chr1_17748806_17748807_A	0	-
chr1	17748816	17748817	chr1_17748816_17748817_C	0	-
chr1	17749354	17749355	chr1_17749354_17749355_A	0	-
chr1	17749369	17749370	chr1_17749369_17749370_C	0	-
chr1	17752198	17752199	chr1_17752198_17752199_A	0	-
chr1	17752204	17752205	chr1_17752204_17752205_A	0	-
chr1	17765041	17765042	chr1_17765041_17765042_C	0	-
chr1	17952429	17952430	chr1_17952429_17952430_A	0	+
chr1	17964356	17964357	chr1_17964356_17964357_C	0	+
chr1	17964949	17964950	chr1_17964949_17964950_T	0	+
chr1	17964950	17964951	chr1_17964950_17964951_C	0	+
chr1	17964964	17964965	chr1_17964964_17964965_C	0	+
chr1	17965031	17965032	chr1_17965031_17965032_A	0	+
chr1	17965036	17965037	chr1_17965036_17965037_A	0	+
chr1	17966666	17966667	chr1_17966666_17966667_A	0	+
chr1	19201094	19201095	chr1_19201094_19201095_A	0	-
chr1	19201096	19201097	chr1_19201096_19201097_T	0	-
chr1	19201099	19201100	chr1_19201099_19201100_C	0	-
chr1	19201100	19201101	chr1_19201100_19201101_T	0	-
chr1	19201101	19201102	chr1_19201101_19201102_C	0	-
chr1	19202017	19202018	chr1_19202017_19202018_A	0	-
chr1	19401417	19401418	chr1_19401417_19401418_A	0	-
chr1	19401419	19401420	chr1_19401419_19401420_T	0	-
chr1	19403429	19403430	chr1_19403429_19403430_A	0	-
chr1	19408087	19408088	chr1_19408087_19408088_A	0	-
chr1	19411215	19411216	chr1_19411215_19411216_A	0	-
chr1	19411220	19411221	chr1_19411220_19411221_A	0	-
chr1	19412788	19412789	chr1_19412788_19412789_T	0	-
chr1	19412798	19412799	chr1_19412798_19412799_A	0	-
chr1	19413359	19413360	chr1_19413359_19413360_A	0	-
chr1	19414447	19414448	chr1_19414447_19414448_A	0	-
chr1	19419434	19419435	chr1_19419434_19419435_A	0	-
chr1	19419435	19419436	chr1_19419435_19419436_A	0	-
chr1	19420009	19420010	chr1_19420009_19420010_A	0	-
chr1	19420651	19420652	chr1_19420651_19420652_A	0	-
chr1	19420657	19420658	chr1_19420657_19420658_A	0	-
chr1	19420662	19420663	chr1_19420662_19420663_A	0	-
chr1	19420666	19420667	chr1_19420666_19420667_A	0	-
chr1	19421540	19421541	chr1_19421540_19421541_A	0	-
chr1	19422163	19422164	chr1_19422163_19422164_A	0	-
chr1	19423179	19423180	chr1_19423179_19423180_A	0	-
chr1	19423181	19423182	chr1_19423181_19423182_T	0	-
chr1	19423183	19423184	chr1_19423183_19423184_C	0	-
chr1	19423184	19423185	chr1_19423184_19423185_A	0	-
chr1	19426188	19426189	chr1_19426188_19426189_A	0	-
chr1	19426194	19426195	chr1_19426194_19426195_A	0	-
chr1	19427091	19427092	chr1_19427091_19427092_A	0	-
chr1	19428159	19428160	chr1_19428159_19428160_A	0	-
chr1	19430771	19430772	chr1_19430771_19430772_A	0	-
chr1	19430776	19430777	chr1_19430776_19430777_A	0	-
chr1	19431182	19431183	chr1_19431182_19431183_A	0	-
chr1	19431184	19431185	chr1_19431184_19431185_T	0	-
chr1	19431712	19431713	chr1_19431712_19431713_A	0	-
chr1	19431720	19431721	chr1_19431720_19431721_A	0	-
chr1	19432364	19432365	chr1_19432364_19432365_T	0	-
chr1	19439391	19439392	chr1_19439391_19439392_A	0	-
chr1	19439393	19439394	chr1_19439393_19439394_T	0	-
chr1	19441465	19441466	chr1_19441465_19441466_A	0	-
chr1	19441467	19441468	chr1_19441467_19441468_T	0	-
chr1	19443937	19443938	chr1_19443937_19443938_A	0	-
chr1	19443939	19443940	chr1_19443939_19443940_T	0	-
chr1	19444422	19444423	chr1_19444422_19444423_A	0	-
chr1	19444428	19444429	chr1_19444428_19444429_A	0	-
chr1	19445467	19445468	chr1_19445467_19445468_A	0	-
chr1	19445479	19445480	chr1_19445479_19445480_A	0	-
chr1	19445480	19445481	chr1_19445480_19445481_A	0	-
chr1	19446218	19446219	chr1_19446218_19446219_A	0	-
chr1	19446219	19446220	chr1_19446219_19446220_A	0	-
chr1	19446862	19446863	chr1_19446862_19446863_A	0	-
chr1	19448532	19448533	chr1_19448532_19448533_C	0	-
chr1	19448533	19448534	chr1_19448533_19448534_C	0	-
chr1	19448536	19448537	chr1_19448536_19448537_A	0	-
chr1	19449584	19449585	chr1_19449584_19449585_A	0	-
chr1	19451204	19451205	chr1_19451204_19451205_A	0	-
chr1	19451214	19451215	chr1_19451214_19451215_A	0	-
chr1	19453174	19453175	chr1_19453174_19453175_A	0	-
chr1	19453177	19453178	chr1_19453177_19453178_C	0	-
chr1	19453187	19453188	chr1_19453187_19453188_A	0	-
chr1	19453188	19453189	chr1_19453188_19453189_A	0	-
chr1	19453190	19453191	chr1_19453190_19453191_A	0	-
chr1	19454252	19454253	chr1_19454252_19454253_A	0	-
chr1	19454264	19454265	chr1_19454264_19454265_A	0	-
chr1	19454267	19454268	chr1_19454267_19454268_A	0	-
chr1	19454268	19454269	chr1_19454268_19454269_A	0	-
chr1	19454271	19454272	chr1_19454271_19454272_A	0	-
chr1	19454816	19454817	chr1_19454816_19454817_T	0	-
chr1	19454835	19454836	chr1_19454835_19454836_G	0	-
chr1	19454840	19454841	chr1_19454840_19454841_G	0	-
chr1	19454847	19454848	chr1_19454847_19454848_A	0	-
chr1	19464704	19464705	chr1_19464704_19464705_A	0	-
chr1	19465739	19465740	chr1_19465739_19465740_T	0	-
chr1	19467405	19467406	chr1_19467405_19467406_A	0	-
chr1	19468290	19468291	chr1_19468290_19468291_C	0	-
chr1	19470591	19470592	chr1_19470591_19470592_A	0	-
chr1	19470606	19470607	chr1_19470606_19470607_A	0	-
chr1	19471432	19471433	chr1_19471432_19471433_A	0	-
chr1	19472449	19472450	chr1_19472449_19472450_A	0	-
chr1	19474642	19474643	chr1_19474642_19474643_A	0	-
chr1	19474643	19474644	chr1_19474643_19474644_A	0	-
chr1	19478375	19478376	chr1_19478375_19478376_A	0	-
chr1	19480015	19480016	chr1_19480015_19480016_C	0	-
chr1	19480456	19480457	chr1_19480456_19480457_T	0	-
chr1	19480459	19480460	chr1_19480459_19480460_A	0	-
chr1	19481592	19481593	chr1_19481592_19481593_A	0	-
chr1	19481595	19481596	chr1_19481595_19481596_T	0	-
chr1	19481597	19481598	chr1_19481597_19481598_A	0	-
chr1	19481604	19481605	chr1_19481604_19481605_A	0	-
chr1	19482186	19482187	chr1_19482186_19482187_A	0	-
chr1	19482195	19482196	chr1_19482195_19482196_A	0	-
chr1	19482920	19482921	chr1_19482920_19482921_C	0	-
chr1	19482944	19482945	chr1_19482944_19482945_A	0	-
chr1	19482952	19482953	chr1_19482952_19482953_A	0	-
chr1	19483433	19483434	chr1_19483433_19483434_A	0	-
chr1	19483437	19483438	chr1_19483437_19483438_A	0	-
chr1	19483445	19483446	chr1_19483445_19483446_A	0	-
chr1	19484519	19484520	chr1_19484519_19484520_C	0	-
chr1	19484520	19484521	chr1_19484520_19484521_G	0	-
chr1	19484521	19484522	chr1_19484521_19484522_T	0	-
chr1	19486794	19486795	chr1_19486794_19486795_A	0	-
chr1	19486802	19486803	chr1_19486802_19486803_A	0	-
chr1	19487667	19487668	chr1_19487667_19487668_A	0	-
chr1	19487668	19487669	chr1_19487668_19487669_T	0	-
chr1	19488412	19488413	chr1_19488412_19488413_A	0	-
chr1	19488413	19488414	chr1_19488413_19488414_A	0	-
chr1	19490363	19490364	chr1_19490363_19490364_A	0	-
chr1	19490957	19490958	chr1_19490957_19490958_A	0	-
chr1	19490961	19490962	chr1_19490961_19490962_A	0	-
chr1	19490965	19490966	chr1_19490965_19490966_A	0	-
chr1	19490969	19490970	chr1_19490969_19490970_G	0	-
chr1	19491492	19491493	chr1_19491492_19491493_A	0	-
chr1	19491515	19491516	chr1_19491515_19491516_C	0	-
chr1	19491516	19491517	chr1_19491516_19491517_A	0	-
chr1	19491517	19491518	chr1_19491517_19491518_G	0	-
chr1	19491518	19491519	chr1_19491518_19491519_T	0	-
chr1	19491876	19491877	chr1_19491876_19491877_A	0	-
chr1	19491893	19491894	chr1_19491893_19491894_T	0	-
chr1	19491981	19491982	chr1_19491981_19491982_G	0	-
chr1	19492271	19492272	chr1_19492271_19492272_A	0	-
chr1	19494700	19494701	chr1_19494700_19494701_A	0	-
chr1	19494738	19494739	chr1_19494738_19494739_T	0	-
chr1	19496055	19496056	chr1_19496055_19496056_A	0	-
chr1	19497408	19497409	chr1_19497408_19497409_A	0	-
chr1	19501546	19501547	chr1_19501546_19501547_A	0	-
chr1	19501547	19501548	chr1_19501547_19501548_A	0	-
chr1	19501581	19501582	chr1_19501581_19501582_A	0	-
chr1	19503244	19503245	chr1_19503244_19503245_A	0	-
chr1	19503245	19503246	chr1_19503245_19503246_A	0	-
chr1	19504254	19504255	chr1_19504254_19504255_A	0	-
chr1	19504258	19504259	chr1_19504258_19504259_A	0	-
chr1	19510694	19510695	chr1_19510694_19510695_A	0	-
chr1	19510696	19510697	chr1_19510696_19510697_A	0	-
chr1	19511809	19511810	chr1_19511809_19511810_A	0	-
chr1	19513183	19513184	chr1_19513183_19513184_A	0	-
chr1	19519063	19519064	chr1_19519063_19519064_A	0	-
chr1	19524565	19524566	chr1_19524565_19524566_A	0	-
chr1	19525190	19525191	chr1_19525190_19525191_G	0	-
chr1	19525201	19525202	chr1_19525201_19525202_C	0	-
chr1	19525203	19525204	chr1_19525203_19525204_A	0	-
chr1	19525443	19525444	chr1_19525443_19525444_T	0	-
chr1	19525472	19525473	chr1_19525472_19525473_A	0	-
chr1	19528331	19528332	chr1_19528331_19528332_C	0	-
chr1	19528332	19528333	chr1_19528332_19528333_G	0	-
chr1	19528333	19528334	chr1_19528333_19528334_G	0	-
chr1	19546221	19546222	chr1_19546221_19546222_A	0	-
chr1	19547452	19547453	chr1_19547452_19547453_A	0	-
chr1	19547454	19547455	chr1_19547454_19547455_T	0	-
chr1	19549396	19549397	chr1_19549396_19549397_T	0	-
chr1	19557489	19557490	chr1_19557489_19557490_A	0	-
chr1	19557490	19557491	chr1_19557490_19557491_T	0	-
chr1	19557933	19557934	chr1_19557933_19557934_A	0	-
chr1	19561770	19561771	chr1_19561770_19561771_A	0	-
chr1	19563745	19563746	chr1_19563745_19563746_A	0	-
chr1	19564655	19564656	chr1_19564655_19564656_A	0	-
chr1	19565372	19565373	chr1_19565372_19565373_C	0	-
chr1	19565380	19565381	chr1_19565380_19565381_A	0	-
chr1	19565382	19565383	chr1_19565382_19565383_T	0	-
chr1	19565392	19565393	chr1_19565392_19565393_A	0	-
chr1	19565815	19565816	chr1_19565815_19565816_A	0	-
chr1	19565817	19565818	chr1_19565817_19565818_T	0	-
chr1	19565820	19565821	chr1_19565820_19565821_A	0	-
chr1	19566957	19566958	chr1_19566957_19566958_A	0	-
chr1	19566958	19566959	chr1_19566958_19566959_A	0	-
chr1	19570222	19570223	chr1_19570222_19570223_A	0	-
chr1	19570532	19570533	chr1_19570532_19570533_A	0	-
chr1	19570533	19570534	chr1_19570533_19570534_A	0	-
chr1	19582417	19582418	chr1_19582417_19582418_A	0	+
chr1	19583918	19583919	chr1_19583918_19583919_A	0	+
chr1	19584282	19584283	chr1_19584282_19584283_C	0	+
chr1	19584299	19584300	chr1_19584299_19584300_C	0	+
chr1	19584302	19584303	chr1_19584302_19584303_C	0	+
chr1	19584303	19584304	chr1_19584303_19584304_C	0	+
chr1	19584305	19584306	chr1_19584305_19584306_A	0	+
chr1	19584306	19584307	chr1_19584306_19584307_C	0	+
chr1	19584944	19584945	chr1_19584944_19584945_T	0	+
chr1	19632671	19632672	chr1_19632671_19632672_T	0	-
chr1	19633612	19633613	chr1_19633612_19633613_A	0	-
chr1	19633614	19633615	chr1_19633614_19633615_T	0	-
chr1	19633941	19633942	chr1_19633941_19633942_A	0	-
chr1	19634776	19634777	chr1_19634776_19634777_A	0	-
chr1	19653982	19653983	chr1_19653982_19653983_A	0	+
chr1	19670944	19670945	chr1_19670944_19670945_A	0	-
chr1	19670945	19670946	chr1_19670945_19670946_G	0	-
chr1	19670946	19670947	chr1_19670946_19670947_T	0	-
chr1	19670955	19670956	chr1_19670955_19670956_C	0	-
chr1	19670965	19670966	chr1_19670965_19670966_T	0	-
chr1	19683270	19683271	chr1_19683270_19683271_A	0	-
chr1	19924302	19924303	chr1_19924302_19924303_A	0	+
chr1	20216855	20216856	chr1_20216855_20216856_A	0	+
chr1	20224003	20224004	chr1_20224003_20224004_A	0	+
chr1	20232902	20232903	chr1_20232902_20232903_A	0	+
chr1	20810239	20810240	chr1_20810239_20810240_A	0	-
chr1	20827930	20827931	chr1_20827930_20827931_A	0	-
chr1	20827936	20827937	chr1_20827936_20827937_A	0	-
chr1	20828700	20828701	chr1_20828700_20828701_A	0	-
chr1	20828703	20828704	chr1_20828703_20828704_A	0	-
chr1	20829826	20829827	chr1_20829826_20829827_A	0	-
chr1	20974970	20974971	chr1_20974970_20974971_A	0	+
chr1	20975460	20975461	chr1_20975460_20975461_G	0	+
chr1	20975461	20975462	chr1_20975461_20975462_A	0	+
chr1	20979040	20979041	chr1_20979040_20979041_C	0	-
chr1	20979042	20979043	chr1_20979042_20979043_T	0	-
chr1	20980292	20980293	chr1_20980292_20980293_A	0	-
chr1	20982298	20982299	chr1_20982298_20982299_A	0	-
chr1	21050247	21050248	chr1_21050247_21050248_A	0	-
chr1	21053586	21053587	chr1_21053586_21053587_A	0	-
chr1	21072169	21072170	chr1_21072169_21072170_A	0	-
chr1	21076397	21076398	chr1_21076397_21076398_T	0	-
chr1	21083779	21083780	chr1_21083779_21083780_A	0	-
chr1	21094179	21094180	chr1_21094179_21094180_T	0	-
chr1	21097590	21097591	chr1_21097590_21097591_A	0	-
chr1	21102521	21102522	chr1_21102521_21102522_A	0	-
chr1	21102522	21102523	chr1_21102522_21102523_A	0	-
chr1	21102528	21102529	chr1_21102528_21102529_A	0	-
chr1	21102529	21102530	chr1_21102529_21102530_A	0	-
chr1	21103270	21103271	chr1_21103270_21103271_A	0	-
chr1	21103271	21103272	chr1_21103271_21103272_T	0	-
chr1	21103278	21103279	chr1_21103278_21103279_A	0	-
chr1	21106421	21106422	chr1_21106421_21106422_G	0	-
chr1	21106422	21106423	chr1_21106422_21106423_T	0	-
chr1	21106423	21106424	chr1_21106423_21106424_A	0	-
chr1	21106424	21106425	chr1_21106424_21106425_T	0	-
chr1	21107057	21107058	chr1_21107057_21107058_A	0	-
chr1	21139758	21139759	chr1_21139758_21139759_A	0	-
chr1	21144053	21144054	chr1_21144053_21144054_A	0	-
chr1	21176064	21176065	chr1_21176064_21176065_A	0	-
chr1	21176065	21176066	chr1_21176065_21176066_A	0	-
chr1	21176070	21176071	chr1_21176070_21176071_A	0	-
chr1	21176071	21176072	chr1_21176071_21176072_A	0	-
chr1	21180205	21180206	chr1_21180205_21180206_G	0	-
chr1	21184009	21184010	chr1_21184009_21184010_C	0	-
chr1	21184010	21184011	chr1_21184010_21184011_C	0	-
chr1	21191239	21191240	chr1_21191239_21191240_T	0	-
chr1	21191240	21191241	chr1_21191240_21191241_A	0	-
chr1	21306968	21306969	chr1_21306968_21306969_A	0	-
chr1	21502876	21502877	chr1_21502876_21502877_A	0	-
chr1	21546654	21546655	chr1_21546654_21546655_A	0	-
chr1	21548358	21548359	chr1_21548358_21548359_A	0	-
chr1	21551956	21551957	chr1_21551956_21551957_A	0	-
chr1	21551958	21551959	chr1_21551958_21551959_A	0	-
chr1	21553740	21553741	chr1_21553740_21553741_A	0	-
chr1	21553746	21553747	chr1_21553746_21553747_A	0	-
chr1	21553752	21553753	chr1_21553752_21553753_A	0	-
chr1	21553754	21553755	chr1_21553754_21553755_A	0	-
chr1	21554557	21554558	chr1_21554557_21554558_C	0	-
chr1	21560178	21560179	chr1_21560178_21560179_A	0	-
chr1	21562443	21562444	chr1_21562443_21562444_A	0	-
chr1	21571622	21571623	chr1_21571622_21571623_A	0	-
chr1	21573877	21573878	chr1_21573877_21573878_A	0	-
chr1	21582655	21582656	chr1_21582655_21582656_A	0	-
chr1	21584102	21584103	chr1_21584102_21584103_A	0	-
chr1	21585356	21585357	chr1_21585356_21585357_C	0	-
chr1	21794912	21794913	chr1_21794912_21794913_A	0	+
chr1	21799836	21799837	chr1_21799836_21799837_A	0	+
chr1	21924243	21924244	chr1_21924243_21924244_T	0	-
chr1	21924576	21924577	chr1_21924576_21924577_C	0	-
chr1	21928319	21928320	chr1_21928319_21928320_A	0	-
chr1	21928320	21928321	chr1_21928320_21928321_A	0	-
chr1	21935468	21935469	chr1_21935468_21935469_A	0	-
chr1	21936158	21936159	chr1_21936158_21936159_A	0	-
chr1	21940221	21940222	chr1_21940221_21940222_A	0	-
chr1	21944001	21944002	chr1_21944001_21944002_A	0	-
chr1	21944013	21944014	chr1_21944013_21944014_G	0	-
chr1	22005959	22005960	chr1_22005959_22005960_A	0	-
chr1	22013767	22013768	chr1_22013767_22013768_C	0	-
chr1	22013768	22013769	chr1_22013768_22013769_C	0	-
chr1	22030148	22030149	chr1_22030148_22030149_A	0	-
chr1	22030152	22030153	chr1_22030152_22030153_C	0	-
chr1	22032366	22032367	chr1_22032366_22032367_A	0	-
chr1	22032367	22032368	chr1_22032367_22032368_A	0	-
chr1	22032711	22032712	chr1_22032711_22032712_A	0	-
chr1	22032712	22032713	chr1_22032712_22032713_G	0	-
chr1	22032752	22032753	chr1_22032752_22032753_A	0	-
chr1	22033108	22033109	chr1_22033108_22033109_A	0	-
chr1	22047678	22047679	chr1_22047678_22047679_A	0	-
chr1	22047686	22047687	chr1_22047686_22047687_A	0	-
chr1	22048294	22048295	chr1_22048294_22048295_A	0	-
chr1	22048298	22048299	chr1_22048298_22048299_T	0	-
chr1	22079641	22079642	chr1_22079641_22079642_A	0	-
chr1	22151293	22151294	chr1_22151293_22151294_A	0	-
chr1	22151311	22151312	chr1_22151311_22151312_T	0	-
chr1	22154668	22154669	chr1_22154668_22154669_A	0	-
chr1	22154941	22154942	chr1_22154941_22154942_C	0	-
chr1	22154942	22154943	chr1_22154942_22154943_C	0	-
chr1	22154943	22154944	chr1_22154943_22154944_T	0	-
chr1	22154945	22154946	chr1_22154945_22154946_A	0	-
chr1	22155594	22155595	chr1_22155594_22155595_A	0	-
chr1	22155595	22155596	chr1_22155595_22155596_A	0	-
chr1	22155598	22155599	chr1_22155598_22155599_C	0	-
chr1	22155603	22155604	chr1_22155603_22155604_A	0	-
chr1	22156115	22156116	chr1_22156115_22156116_T	0	-
chr1	22158337	22158338	chr1_22158337_22158338_A	0	-
chr1	22159195	22159196	chr1_22159195_22159196_A	0	-
chr1	22160125	22160126	chr1_22160125_22160126_A	0	-
chr1	22160136	22160137	chr1_22160136_22160137_C	0	-
chr1	22160446	22160447	chr1_22160446_22160447_A	0	-
chr1	22160451	22160452	chr1_22160451_22160452_T	0	-
chr1	22160504	22160505	chr1_22160504_22160505_T	0	-
chr1	22161460	22161461	chr1_22161460_22161461_A	0	-
chr1	22161464	22161465	chr1_22161464_22161465_C	0	-
chr1	22161465	22161466	chr1_22161465_22161466_A	0	-
chr1	22162156	22162157	chr1_22162156_22162157_T	0	-
chr1	22163514	22163515	chr1_22163514_22163515_A	0	-
chr1	22163522	22163523	chr1_22163522_22163523_A	0	-
chr1	22163524	22163525	chr1_22163524_22163525_G	0	-
chr1	22166058	22166059	chr1_22166058_22166059_C	0	-
chr1	22166072	22166073	chr1_22166072_22166073_A	0	-
chr1	22166076	22166077	chr1_22166076_22166077_A	0	-
chr1	22167791	22167792	chr1_22167791_22167792_A	0	-
chr1	22168896	22168897	chr1_22168896_22168897_A	0	-
chr1	22168897	22168898	chr1_22168897_22168898_A	0	-
chr1	22168899	22168900	chr1_22168899_22168900_A	0	-
chr1	22169430	22169431	chr1_22169430_22169431_A	0	-
chr1	22169431	22169432	chr1_22169431_22169432_C	0	-
chr1	22169434	22169435	chr1_22169434_22169435_A	0	-
chr1	22169435	22169436	chr1_22169435_22169436_C	0	-
chr1	22169440	22169441	chr1_22169440_22169441_T	0	-
chr1	22169961	22169962	chr1_22169961_22169962_A	0	-
chr1	22170815	22170816	chr1_22170815_22170816_A	0	-
chr1	22173111	22173112	chr1_22173111_22173112_A	0	-
chr1	22174017	22174018	chr1_22174017_22174018_C	0	-
chr1	22174018	22174019	chr1_22174018_22174019_C	0	-
chr1	22174021	22174022	chr1_22174021_22174022_A	0	-
chr1	22174023	22174024	chr1_22174023_22174024_C	0	-
chr1	22174024	22174025	chr1_22174024_22174025_T	0	-
chr1	22174026	22174027	chr1_22174026_22174027_C	0	-
chr1	22174037	22174038	chr1_22174037_22174038_A	0	-
chr1	22174602	22174603	chr1_22174602_22174603_C	0	-
chr1	22174604	22174605	chr1_22174604_22174605_T	0	-
chr1	22174607	22174608	chr1_22174607_22174608_T	0	-
chr1	22174608	22174609	chr1_22174608_22174609_C	0	-
chr1	22174610	22174611	chr1_22174610_22174611_A	0	-
chr1	22174614	22174615	chr1_22174614_22174615_C	0	-
chr1	22174616	22174617	chr1_22174616_22174617_T	0	-
chr1	22175540	22175541	chr1_22175540_22175541_C	0	-
chr1	22175547	22175548	chr1_22175547_22175548_C	0	-
chr1	22175553	22175554	chr1_22175553_22175554_A	0	-
chr1	22175554	22175555	chr1_22175554_22175555_G	0	-
chr1	22177011	22177012	chr1_22177011_22177012_A	0	-
chr1	22178213	22178214	chr1_22178213_22178214_A	0	-
chr1	22178753	22178754	chr1_22178753_22178754_A	0	-
chr1	22179582	22179583	chr1_22179582_22179583_A	0	-
chr1	22179583	22179584	chr1_22179583_22179584_G	0	-
chr1	22179639	22179640	chr1_22179639_22179640_A	0	-
chr1	22180862	22180863	chr1_22180862_22180863_A	0	-
chr1	22181495	22181496	chr1_22181495_22181496_A	0	-
chr1	22181500	22181501	chr1_22181500_22181501_A	0	-
chr1	22182433	22182434	chr1_22182433_22182434_A	0	-
chr1	22182587	22182588	chr1_22182587_22182588_A	0	-
chr1	22186198	22186199	chr1_22186198_22186199_A	0	-
chr1	22186509	22186510	chr1_22186509_22186510_G	0	-
chr1	22188641	22188642	chr1_22188641_22188642_A	0	-
chr1	22191604	22191605	chr1_22191604_22191605_A	0	-
chr1	22191878	22191879	chr1_22191878_22191879_A	0	-
chr1	22191879	22191880	chr1_22191879_22191880_A	0	-
chr1	22199272	22199273	chr1_22199272_22199273_C	0	-
chr1	22199275	22199276	chr1_22199275_22199276_C	0	-
chr1	22199288	22199289	chr1_22199288_22199289_A	0	-
chr1	22199292	22199293	chr1_22199292_22199293_A	0	-
chr1	22200528	22200529	chr1_22200528_22200529_A	0	-
chr1	22200529	22200530	chr1_22200529_22200530_G	0	-
chr1	22200530	22200531	chr1_22200530_22200531_T	0	-
chr1	22201245	22201246	chr1_22201245_22201246_C	0	-
chr1	22201246	22201247	chr1_22201246_22201247_C	0	-
chr1	22201517	22201518	chr1_22201517_22201518_A	0	-
chr1	22202555	22202556	chr1_22202555_22202556_C	0	-
chr1	22203166	22203167	chr1_22203166_22203167_A	0	-
chr1	22204773	22204774	chr1_22204773_22204774_C	0	-
chr1	22205178	22205179	chr1_22205178_22205179_C	0	-
chr1	22205180	22205181	chr1_22205180_22205181_T	0	-
chr1	22205181	22205182	chr1_22205181_22205182_A	0	-
chr1	22205185	22205186	chr1_22205185_22205186_C	0	-
chr1	22206770	22206771	chr1_22206770_22206771_A	0	-
chr1	22206774	22206775	chr1_22206774_22206775_A	0	-
chr1	22208017	22208018	chr1_22208017_22208018_A	0	-
chr1	22211667	22211668	chr1_22211667_22211668_C	0	-
chr1	22211668	22211669	chr1_22211668_22211669_C	0	-
chr1	22211669	22211670	chr1_22211669_22211670_T	0	-
chr1	22211671	22211672	chr1_22211671_22211672_A	0	-
chr1	22211965	22211966	chr1_22211965_22211966_A	0	-
chr1	22214587	22214588	chr1_22214587_22214588_A	0	-
chr1	22216664	22216665	chr1_22216664_22216665_A	0	-
chr1	22413129	22413130	chr1_22413129_22413130_A	0	+
chr1	22417895	22417896	chr1_22417895_22417896_A	0	+
chr1	22817864	22817865	chr1_22817864_22817865_G	0	+
chr1	22828751	22828752	chr1_22828751_22828752_A	0	+
chr1	22834459	22834460	chr1_22834459_22834460_A	0	+
chr1	22834466	22834467	chr1_22834466_22834467_A	0	+
chr1	22834994	22834995	chr1_22834994_22834995_A	0	+
chr1	22839369	22839370	chr1_22839369_22839370_T	0	+
chr1	22839370	22839371	chr1_22839370_22839371_G	0	+
chr1	22839380	22839381	chr1_22839380_22839381_A	0	+
chr1	22839387	22839388	chr1_22839387_22839388_C	0	+
chr1	22839389	22839390	chr1_22839389_22839390_G	0	+
chr1	22839390	22839391	chr1_22839390_22839391_G	0	+
chr1	22846494	22846495	chr1_22846494_22846495_C	0	+
chr1	22847966	22847967	chr1_22847966_22847967_A	0	+
chr1	22852651	22852652	chr1_22852651_22852652_T	0	+
chr1	22852670	22852671	chr1_22852670_22852671_A	0	+
chr1	23235484	23235485	chr1_23235484_23235485_C	0	+
chr1	23381532	23381533	chr1_23381532_23381533_A	0	+
chr1	23395537	23395538	chr1_23395537_23395538_A	0	+
chr1	23397686	23397687	chr1_23397686_23397687_G	0	+
chr1	23397694	23397695	chr1_23397694_23397695_A	0	+
chr1	23397695	23397696	chr1_23397695_23397696_A	0	+
chr1	23398590	23398591	chr1_23398590_23398591_A	0	+
chr1	23398594	23398595	chr1_23398594_23398595_A	0	+
chr1	23398598	23398599	chr1_23398598_23398599_T	0	+
chr1	23399756	23399757	chr1_23399756_23399757_A	0	+
chr1	23399757	23399758	chr1_23399757_23399758_A	0	+
chr1	23405450	23405451	chr1_23405450_23405451_A	0	+
chr1	23406015	23406016	chr1_23406015_23406016_A	0	+
chr1	23406020	23406021	chr1_23406020_23406021_C	0	+
chr1	23406023	23406024	chr1_23406023_23406024_A	0	+
chr1	23406024	23406025	chr1_23406024_23406025_T	0	+
chr1	23408683	23408684	chr1_23408683_23408684_A	0	+
chr1	23408684	23408685	chr1_23408684_23408685_T	0	+
chr1	23408686	23408687	chr1_23408686_23408687_A	0	+
chr1	23409637	23409638	chr1_23409637_23409638_A	0	+
chr1	23409646	23409647	chr1_23409646_23409647_A	0	+
chr1	23415568	23415569	chr1_23415568_23415569_A	0	-
chr1	23637839	23637840	chr1_23637839_23637840_A	0	-
chr1	23637840	23637841	chr1_23637840_23637841_A	0	-
chr1	23640225	23640226	chr1_23640225_23640226_A	0	-
chr1	23645205	23645206	chr1_23645205_23645206_A	0	-
chr1	23645212	23645213	chr1_23645212_23645213_T	0	-
chr1	23645213	23645214	chr1_23645213_23645214_T	0	-
chr1	23664383	23664384	chr1_23664383_23664384_T	0	-
chr1	23664385	23664386	chr1_23664385_23664386_A	0	-
chr1	23664386	23664387	chr1_23664386_23664387_G	0	-
chr1	23667534	23667535	chr1_23667534_23667535_A	0	-
chr1	23697610	23697611	chr1_23697610_23697611_G	0	+
chr1	23707993	23707994	chr1_23707993_23707994_A	0	-
chr1	23757642	23757643	chr1_23757642_23757643_A	0	-
chr1	23762521	23762522	chr1_23762521_23762522_G	0	-
chr1	23762544	23762545	chr1_23762544_23762545_A	0	-
chr1	23768269	23768270	chr1_23768269_23768270_A	0	-
chr1	23768276	23768277	chr1_23768276_23768277_A	0	-
chr1	23779283	23779284	chr1_23779283_23779284_A	0	-
chr1	23836662	23836663	chr1_23836662_23836663_A	0	-
chr1	23847592	23847593	chr1_23847592_23847593_A	0	-
chr1	23851012	23851013	chr1_23851012_23851013_A	0	-
chr1	23884940	23884941	chr1_23884940_23884941_G	0	-
chr1	23884941	23884942	chr1_23884941_23884942_T	0	-
chr1	24019075	24019076	chr1_24019075_24019076_A	0	+
chr1	24020271	24020272	chr1_24020271_24020272_A	0	+
chr1	24021113	24021114	chr1_24021113_24021114_T	0	+
chr1	24021115	24021116	chr1_24021115_24021116_A	0	+
chr1	24021117	24021118	chr1_24021117_24021118_A	0	+
chr1	24021127	24021128	chr1_24021127_24021128_A	0	+
chr1	24021129	24021130	chr1_24021129_24021130_T	0	+
chr1	24022259	24022260	chr1_24022259_24022260_A	0	+
chr1	24022262	24022263	chr1_24022262_24022263_T	0	+
chr1	24022264	24022265	chr1_24022264_24022265_A	0	+
chr1	24022805	24022806	chr1_24022805_24022806_T	0	+
chr1	24076308	24076309	chr1_24076308_24076309_A	0	+
chr1	24077306	24077307	chr1_24077306_24077307_A	0	+
chr1	24078858	24078859	chr1_24078858_24078859_A	0	+
chr1	24078862	24078863	chr1_24078862_24078863_A	0	+
chr1	24082737	24082738	chr1_24082737_24082738_A	0	+
chr1	24082745	24082746	chr1_24082745_24082746_A	0	+
chr1	24083249	24083250	chr1_24083249_24083250_A	0	+
chr1	24083348	24083349	chr1_24083348_24083349_G	0	+
chr1	24083418	24083419	chr1_24083418_24083419_A	0	+
chr1	24083419	24083420	chr1_24083419_24083420_A	0	+
chr1	24085974	24085975	chr1_24085974_24085975_A	0	+
chr1	24085976	24085977	chr1_24085976_24085977_A	0	+
chr1	24098402	24098403	chr1_24098402_24098403_A	0	-
chr1	24112139	24112140	chr1_24112139_24112140_A	0	+
chr1	24112761	24112762	chr1_24112761_24112762_A	0	+
chr1	24112766	24112767	chr1_24112766_24112767_A	0	+
chr1	24112771	24112772	chr1_24112771_24112772_A	0	+
chr1	24112773	24112774	chr1_24112773_24112774_A	0	+
chr1	24120164	24120165	chr1_24120164_24120165_A	0	+
chr1	24124381	24124382	chr1_24124381_24124382_A	0	-
chr1	24124383	24124384	chr1_24124383_24124384_T	0	-
chr1	24125522	24125523	chr1_24125522_24125523_A	0	-
chr1	24134834	24134835	chr1_24134834_24134835_A	0	-
chr1	24143287	24143288	chr1_24143287_24143288_A	0	-
chr1	24287890	24287891	chr1_24287890_24287891_A	0	+
chr1	24298141	24298142	chr1_24298141_24298142_A	0	-
chr1	24298537	24298538	chr1_24298537_24298538_A	0	-
chr1	24304789	24304790	chr1_24304789_24304790_A	0	-
chr1	24305328	24305329	chr1_24305328_24305329_A	0	-
chr1	24486155	24486156	chr1_24486155_24486156_A	0	-
chr1	24685136	24685137	chr1_24685136_24685137_A	0	-
chr1	24768514	24768515	chr1_24768514_24768515_A	0	+
chr1	24779871	24779872	chr1_24779871_24779872_A	0	+
chr1	24973131	24973132	chr1_24973131_24973132_A	0	+
chr1	24973135	24973136	chr1_24973135_24973136_A	0	+
chr1	24973533	24973534	chr1_24973533_24973534_A	0	+
chr1	24973541	24973542	chr1_24973541_24973542_A	0	+
chr1	24973542	24973543	chr1_24973542_24973543_A	0	+
chr1	24975316	24975317	chr1_24975316_24975317_A	0	+
chr1	24976427	24976428	chr1_24976427_24976428_A	0	+
chr1	24977864	24977865	chr1_24977864_24977865_A	0	+
chr1	24977886	24977887	chr1_24977886_24977887_A	0	+
chr1	24979372	24979373	chr1_24979372_24979373_A	0	+
chr1	24979376	24979377	chr1_24979376_24979377_A	0	+
chr1	24979379	24979380	chr1_24979379_24979380_A	0	+
chr1	24979380	24979381	chr1_24979380_24979381_C	0	+
chr1	24979382	24979383	chr1_24979382_24979383_T	0	+
chr1	24979384	24979385	chr1_24979384_24979385_A	0	+
chr1	24987175	24987176	chr1_24987175_24987176_A	0	+
chr1	24989117	24989118	chr1_24989117_24989118_T	0	+
chr1	24989124	24989125	chr1_24989124_24989125_A	0	+
chr1	24989644	24989645	chr1_24989644_24989645_T	0	+
chr1	24989646	24989647	chr1_24989646_24989647_A	0	+
chr1	24995587	24995588	chr1_24995587_24995588_A	0	+
chr1	24995592	24995593	chr1_24995592_24995593_A	0	+
chr1	24996580	24996581	chr1_24996580_24996581_A	0	+
chr1	24996585	24996586	chr1_24996585_24996586_T	0	+
chr1	24996588	24996589	chr1_24996588_24996589_A	0	+
chr1	24997844	24997845	chr1_24997844_24997845_A	0	+
chr1	24997845	24997846	chr1_24997845_24997846_A	0	+
chr1	24997846	24997847	chr1_24997846_24997847_A	0	+
chr1	24998646	24998647	chr1_24998646_24998647_A	0	+
chr1	24998647	24998648	chr1_24998647_24998648_A	0	+
chr1	25549949	25549950	chr1_25549949_25549950_A	0	-
chr1	25554043	25554044	chr1_25554043_25554044_A	0	-
chr1	25554045	25554046	chr1_25554045_25554046_T	0	-
chr1	25554745	25554746	chr1_25554745_25554746_A	0	-
chr1	25554757	25554758	chr1_25554757_25554758_A	0	-
chr1	25569216	25569217	chr1_25569216_25569217_A	0	-
chr1	25570152	25570153	chr1_25570152_25570153_A	0	-
chr1	25570735	25570736	chr1_25570735_25570736_A	0	-
chr1	25570737	25570738	chr1_25570737_25570738_A	0	-
chr1	25571012	25571013	chr1_25571012_25571013_A	0	-
chr1	25571019	25571020	chr1_25571019_25571020_A	0	-
chr1	25571022	25571023	chr1_25571022_25571023_A	0	-
chr1	25571815	25571816	chr1_25571815_25571816_A	0	-
chr1	25784831	25784832	chr1_25784831_25784832_A	0	+
chr1	25784853	25784854	chr1_25784853_25784854_G	0	+
chr1	25784857	25784858	chr1_25784857_25784858_G	0	+
chr1	25784860	25784861	chr1_25784860_25784861_G	0	+
chr1	25812085	25812086	chr1_25812085_25812086_A	0	+
chr1	25817872	25817873	chr1_25817872_25817873_A	0	+
chr1	25817875	25817876	chr1_25817875_25817876_A	0	+
chr1	25881330	25881331	chr1_25881330_25881331_G	0	+
chr1	25881331	25881332	chr1_25881331_25881332_A	0	+
chr1	25883626	25883627	chr1_25883626_25883627_T	0	+
chr1	26128481	26128482	chr1_26128481_26128482_A	0	+
chr1	26131612	26131613	chr1_26131612_26131613_C	0	+
chr1	26136152	26136153	chr1_26136152_26136153_A	0	+
chr1	26137912	26137913	chr1_26137912_26137913_A	0	+
chr1	26137914	26137915	chr1_26137914_26137915_G	0	+
chr1	26137915	26137916	chr1_26137915_26137916_A	0	+
chr1	26137919	26137920	chr1_26137919_26137920_T	0	+
chr1	26137923	26137924	chr1_26137923_26137924_A	0	+
chr1	26140335	26140336	chr1_26140335_26140336_T	0	+
chr1	26140349	26140350	chr1_26140349_26140350_A	0	+
chr1	26153065	26153066	chr1_26153065_26153066_T	0	+
chr1	26153080	26153081	chr1_26153080_26153081_A	0	+
chr1	26155971	26155972	chr1_26155971_26155972_C	0	+
chr1	26162362	26162363	chr1_26162362_26162363_A	0	-
chr1	26230319	26230320	chr1_26230319_26230320_A	0	-
chr1	26230321	26230322	chr1_26230321_26230322_A	0	-
chr1	26230327	26230328	chr1_26230327_26230328_A	0	-
chr1	26230328	26230329	chr1_26230328_26230329_G	0	-
chr1	26230329	26230330	chr1_26230329_26230330_T	0	-
chr1	26231251	26231252	chr1_26231251_26231252_A	0	-
chr1	26360157	26360158	chr1_26360157_26360158_C	0	+
chr1	26383847	26383848	chr1_26383847_26383848_A	0	-
chr1	26385132	26385133	chr1_26385132_26385133_A	0	-
chr1	26496880	26496881	chr1_26496880_26496881_A	0	+
chr1	26511475	26511476	chr1_26511475_26511476_A	0	+
chr1	26511477	26511478	chr1_26511477_26511478_T	0	+
chr1	26515749	26515750	chr1_26515749_26515750_A	0	+
chr1	26584064	26584065	chr1_26584064_26584065_A	0	+
chr1	26584618	26584619	chr1_26584618_26584619_T	0	+
chr1	26597484	26597485	chr1_26597484_26597485_A	0	+
chr1	26598478	26598479	chr1_26598478_26598479_C	0	+
chr1	26598479	26598480	chr1_26598479_26598480_T	0	+
chr1	26598480	26598481	chr1_26598480_26598481_C	0	+
chr1	26598489	26598490	chr1_26598489_26598490_C	0	+
chr1	26598492	26598493	chr1_26598492_26598493_T	0	+
chr1	26598494	26598495	chr1_26598494_26598495_A	0	+
chr1	26601432	26601433	chr1_26601432_26601433_A	0	+
chr1	26602998	26602999	chr1_26602998_26602999_A	0	+
chr1	26603593	26603594	chr1_26603593_26603594_A	0	+
chr1	26603594	26603595	chr1_26603594_26603595_A	0	+
chr1	26610989	26610990	chr1_26610989_26610990_C	0	-
chr1	26610996	26610997	chr1_26610996_26610997_G	0	-
chr1	26610997	26610998	chr1_26610997_26610998_C	0	-
chr1	26610998	26610999	chr1_26610998_26610999_C	0	-
chr1	26610999	26611000	chr1_26610999_26611000_G	0	-
chr1	26611000	26611001	chr1_26611000_26611001_T	0	-
chr1	26611001	26611002	chr1_26611001_26611002_C	0	-
chr1	26611002	26611003	chr1_26611002_26611003_G	0	-
chr1	26611003	26611004	chr1_26611003_26611004_C	0	-
chr1	26611015	26611016	chr1_26611015_26611016_A	0	-
chr1	26611072	26611073	chr1_26611072_26611073_G	0	-
chr1	26611073	26611074	chr1_26611073_26611074_A	0	-
chr1	26611076	26611077	chr1_26611076_26611077_A	0	-
chr1	26612052	26612053	chr1_26612052_26612053_A	0	-
chr1	26623510	26623511	chr1_26623510_26623511_A	0	-
chr1	26623516	26623517	chr1_26623516_26623517_A	0	-
chr1	26764634	26764635	chr1_26764634_26764635_A	0	+
chr1	26784239	26784240	chr1_26784239_26784240_A	0	+
chr1	26799947	26799948	chr1_26799947_26799948_C	0	+
chr1	26799948	26799949	chr1_26799948_26799949_A	0	+
chr1	26800155	26800156	chr1_26800155_26800156_A	0	+
chr1	26800158	26800159	chr1_26800158_26800159_T	0	+
chr1	26800164	26800165	chr1_26800164_26800165_A	0	+
chr1	26800538	26800539	chr1_26800538_26800539_T	0	+
chr1	26800540	26800541	chr1_26800540_26800541_A	0	+
chr1	26800546	26800547	chr1_26800546_26800547_A	0	+
chr1	26801033	26801034	chr1_26801033_26801034_A	0	+
chr1	26801037	26801038	chr1_26801037_26801038_A	0	+
chr1	26801043	26801044	chr1_26801043_26801044_A	0	+
chr1	26801570	26801571	chr1_26801570_26801571_A	0	+
chr1	26801572	26801573	chr1_26801572_26801573_G	0	+
chr1	26801579	26801580	chr1_26801579_26801580_A	0	+
chr1	26801581	26801582	chr1_26801581_26801582_T	0	+
chr1	26873634	26873635	chr1_26873634_26873635_A	0	+
chr1	26873642	26873643	chr1_26873642_26873643_C	0	+
chr1	26873651	26873652	chr1_26873651_26873652_T	0	+
chr1	26873653	26873654	chr1_26873653_26873654_C	0	+
chr1	26873654	26873655	chr1_26873654_26873655_C	0	+
chr1	26873661	26873662	chr1_26873661_26873662_C	0	+
chr1	26879858	26879859	chr1_26879858_26879859_A	0	+
chr1	26880673	26880674	chr1_26880673_26880674_A	0	+
chr1	26880681	26880682	chr1_26880681_26880682_T	0	+
chr1	26880682	26880683	chr1_26880682_26880683_G	0	+
chr1	26880683	26880684	chr1_26880683_26880684_A	0	+
chr1	26881056	26881057	chr1_26881056_26881057_A	0	+
chr1	26882004	26882005	chr1_26882004_26882005_A	0	+
chr1	26883461	26883462	chr1_26883461_26883462_G	0	+
chr1	26883462	26883463	chr1_26883462_26883463_A	0	+
chr1	26885274	26885275	chr1_26885274_26885275_A	0	+
chr1	26887510	26887511	chr1_26887510_26887511_T	0	+
chr1	26887512	26887513	chr1_26887512_26887513_C	0	+
chr1	26898312	26898313	chr1_26898312_26898313_T	0	+
chr1	26898314	26898315	chr1_26898314_26898315_A	0	+
chr1	26898638	26898639	chr1_26898638_26898639_T	0	+
chr1	26898644	26898645	chr1_26898644_26898645_G	0	+
chr1	26900552	26900553	chr1_26900552_26900553_C	0	+
chr1	27057616	27057617	chr1_27057616_27057617_T	0	+
chr1	27057617	27057618	chr1_27057617_27057618_A	0	+
chr1	27057618	27057619	chr1_27057618_27057619_A	0	+
chr1	27059141	27059142	chr1_27059141_27059142_A	0	+
chr1	27087845	27087846	chr1_27087845_27087846_A	0	+
chr1	27087850	27087851	chr1_27087850_27087851_T	0	+
chr1	27087851	27087852	chr1_27087851_27087852_A	0	+
chr1	27089435	27089436	chr1_27089435_27089436_A	0	+
chr1	27094244	27094245	chr1_27094244_27094245_G	0	+
chr1	27094245	27094246	chr1_27094245_27094246_A	0	+
chr1	27094249	27094250	chr1_27094249_27094250_A	0	+
chr1	27094255	27094256	chr1_27094255_27094256_A	0	+
chr1	27098969	27098970	chr1_27098969_27098970_A	0	+
chr1	27098986	27098987	chr1_27098986_27098987_A	0	+
chr1	27099279	27099280	chr1_27099279_27099280_A	0	+
chr1	27099799	27099800	chr1_27099799_27099800_T	0	+
chr1	27099800	27099801	chr1_27099800_27099801_T	0	+
chr1	27099801	27099802	chr1_27099801_27099802_A	0	+
chr1	27099813	27099814	chr1_27099813_27099814_A	0	+
chr1	27100791	27100792	chr1_27100791_27100792_A	0	+
chr1	27102048	27102049	chr1_27102048_27102049_A	0	+
chr1	27102050	27102051	chr1_27102050_27102051_A	0	+
chr1	27117225	27117226	chr1_27117225_27117226_A	0	+
chr1	27177607	27177608	chr1_27177607_27177608_A	0	+
chr1	27177608	27177609	chr1_27177608_27177609_A	0	+
chr1	27179218	27179219	chr1_27179218_27179219_A	0	+
chr1	27180191	27180192	chr1_27180191_27180192_A	0	+
chr1	27180215	27180216	chr1_27180215_27180216_G	0	+
chr1	27210809	27210810	chr1_27210809_27210810_A	0	-
chr1	27215616	27215617	chr1_27215616_27215617_G	0	-
chr1	27215636	27215637	chr1_27215636_27215637_A	0	-
chr1	27215649	27215650	chr1_27215649_27215650_C	0	-
chr1	27219973	27219974	chr1_27219973_27219974_A	0	-
chr1	27269086	27269087	chr1_27269086_27269087_A	0	+
chr1	27269120	27269121	chr1_27269120_27269121_A	0	+
chr1	27269121	27269122	chr1_27269121_27269122_A	0	+
chr1	27269124	27269125	chr1_27269124_27269125_A	0	+
chr1	27269127	27269128	chr1_27269127_27269128_T	0	+
chr1	27269129	27269130	chr1_27269129_27269130_A	0	+
chr1	27271853	27271854	chr1_27271853_27271854_C	0	+
chr1	27271854	27271855	chr1_27271854_27271855_C	0	+
chr1	27272587	27272588	chr1_27272587_27272588_A	0	+
chr1	27427788	27427789	chr1_27427788_27427789_A	0	-
chr1	27429074	27429075	chr1_27429074_27429075_A	0	-
chr1	27429078	27429079	chr1_27429078_27429079_C	0	-
chr1	27429257	27429258	chr1_27429257_27429258_G	0	-
chr1	27608692	27608693	chr1_27608692_27608693_A	0	+
chr1	27620985	27620986	chr1_27620985_27620986_A	0	+
chr1	27622778	27622779	chr1_27622778_27622779_A	0	+
chr1	27624404	27624405	chr1_27624404_27624405_G	0	+
chr1	27627691	27627692	chr1_27627691_27627692_A	0	+
chr1	27631461	27631462	chr1_27631461_27631462_T	0	+
chr1	27657449	27657450	chr1_27657449_27657450_C	0	+
chr1	27658536	27658537	chr1_27658536_27658537_A	0	+
chr1	27660424	27660425	chr1_27660424_27660425_T	0	+
chr1	27661834	27661835	chr1_27661834_27661835_C	0	+
chr1	27661844	27661845	chr1_27661844_27661845_A	0	+
chr1	27681977	27681978	chr1_27681977_27681978_T	0	-
chr1	27682278	27682279	chr1_27682278_27682279_A	0	-
chr1	27682279	27682280	chr1_27682279_27682280_A	0	-
chr1	27682289	27682290	chr1_27682289_27682290_A	0	-
chr1	27682293	27682294	chr1_27682293_27682294_A	0	-
chr1	27682612	27682613	chr1_27682612_27682613_A	0	-
chr1	27684385	27684386	chr1_27684385_27684386_A	0	-
chr1	27684388	27684389	chr1_27684388_27684389_A	0	-
chr1	27684392	27684393	chr1_27684392_27684393_A	0	-
chr1	27686028	27686029	chr1_27686028_27686029_A	0	-
chr1	27686510	27686511	chr1_27686510_27686511_A	0	-
chr1	27688378	27688379	chr1_27688378_27688379_A	0	-
chr1	27688382	27688383	chr1_27688382_27688383_A	0	-
chr1	27688383	27688384	chr1_27688383_27688384_A	0	-
chr1	27690921	27690922	chr1_27690921_27690922_C	0	-
chr1	27706710	27706711	chr1_27706710_27706711_A	0	-
chr1	27720277	27720278	chr1_27720277_27720278_A	0	+
chr1	27734867	27734868	chr1_27734867_27734868_C	0	-
chr1	27878729	27878730	chr1_27878729_27878730_A	0	-
chr1	28086973	28086974	chr1_28086973_28086974_A	0	+
chr1	28086982	28086983	chr1_28086982_28086983_G	0	+
chr1	28086984	28086985	chr1_28086984_28086985_A	0	+
chr1	28146133	28146134	chr1_28146133_28146134_A	0	+
chr1	28169663	28169664	chr1_28169663_28169664_A	0	+
chr1	28173496	28173497	chr1_28173496_28173497_A	0	+
chr1	28176551	28176552	chr1_28176551_28176552_A	0	+
chr1	28176572	28176573	chr1_28176572_28176573_A	0	+
chr1	28203075	28203076	chr1_28203075_28203076_A	0	+
chr1	28206121	28206122	chr1_28206121_28206122_A	0	+
chr1	28218786	28218787	chr1_28218786_28218787_G	0	-
chr1	28315197	28315198	chr1_28315197_28315198_A	0	-
chr1	28527904	28527905	chr1_28527904_28527905_A	0	-
chr1	28530353	28530354	chr1_28530353_28530354_A	0	-
chr1	28531888	28531889	chr1_28531888_28531889_A	0	-
chr1	28531894	28531895	chr1_28531894_28531895_A	0	-
chr1	28536596	28536597	chr1_28536596_28536597_A	0	-
chr1	28536597	28536598	chr1_28536597_28536598_A	0	-
chr1	28536598	28536599	chr1_28536598_28536599_T	0	-
chr1	28536601	28536602	chr1_28536601_28536602_A	0	-
chr1	28536604	28536605	chr1_28536604_28536605_A	0	-
chr1	28536605	28536606	chr1_28536605_28536606_A	0	-
chr1	28537198	28537199	chr1_28537198_28537199_A	0	-
chr1	28598699	28598700	chr1_28598699_28598700_A	0	+
chr1	28599068	28599069	chr1_28599068_28599069_A	0	+
chr1	28599847	28599848	chr1_28599847_28599848_A	0	+
chr1	28600525	28600526	chr1_28600525_28600526_A	0	+
chr1	28601310	28601311	chr1_28601310_28601311_A	0	+
chr1	28657083	28657084	chr1_28657083_28657084_A	0	+
chr1	28657086	28657087	chr1_28657086_28657087_A	0	+
chr1	28660904	28660905	chr1_28660904_28660905_A	0	+
chr1	28792851	28792852	chr1_28792851_28792852_A	0	+
chr1	28792853	28792854	chr1_28792853_28792854_T	0	+
chr1	28792861	28792862	chr1_28792861_28792862_C	0	+
chr1	28816254	28816255	chr1_28816254_28816255_A	0	+
chr1	28834611	28834612	chr1_28834611_28834612_A	0	+
chr1	28834613	28834614	chr1_28834613_28834614_T	0	+
chr1	28834614	28834615	chr1_28834614_28834615_A	0	+
chr1	28834615	28834616	chr1_28834615_28834616_A	0	+
chr1	28834616	28834617	chr1_28834616_28834617_T	0	+
chr1	28835310	28835311	chr1_28835310_28835311_A	0	+
chr1	28835313	28835314	chr1_28835313_28835314_A	0	+
chr1	28835318	28835319	chr1_28835318_28835319_A	0	+
chr1	28835319	28835320	chr1_28835319_28835320_A	0	+
chr1	28858285	28858286	chr1_28858285_28858286_A	0	+
chr1	28858661	28858662	chr1_28858661_28858662_A	0	+
chr1	28861538	28861539	chr1_28861538_28861539_A	0	+
chr1	28862090	28862091	chr1_28862090_28862091_A	0	+
chr1	28862096	28862097	chr1_28862096_28862097_C	0	+
chr1	28862191	28862192	chr1_28862191_28862192_C	0	+
chr1	28862349	28862350	chr1_28862349_28862350_T	0	+
chr1	28862355	28862356	chr1_28862355_28862356_T	0	+
chr1	28862357	28862358	chr1_28862357_28862358_A	0	+
chr1	28862359	28862360	chr1_28862359_28862360_C	0	+
chr1	28862733	28862734	chr1_28862733_28862734_A	0	+
chr1	28862736	28862737	chr1_28862736_28862737_A	0	+
chr1	28862749	28862750	chr1_28862749_28862750_T	0	+
chr1	28862750	28862751	chr1_28862750_28862751_G	0	+
chr1	28862751	28862752	chr1_28862751_28862752_A	0	+
chr1	28863228	28863229	chr1_28863228_28863229_T	0	+
chr1	28863229	28863230	chr1_28863229_28863230_A	0	+
chr1	28863230	28863231	chr1_28863230_28863231_T	0	+
chr1	28863231	28863232	chr1_28863231_28863232_T	0	+
chr1	28863236	28863237	chr1_28863236_28863237_A	0	+
chr1	28864316	28864317	chr1_28864316_28864317_A	0	+
chr1	28864322	28864323	chr1_28864322_28864323_A	0	+
chr1	28864323	28864324	chr1_28864323_28864324_C	0	+
chr1	28891184	28891185	chr1_28891184_28891185_C	0	+
chr1	28897655	28897656	chr1_28897655_28897656_T	0	+
chr1	28905206	28905207	chr1_28905206_28905207_A	0	-
chr1	28905214	28905215	chr1_28905214_28905215_A	0	-
chr1	28905215	28905216	chr1_28905215_28905216_C	0	-
chr1	28905216	28905217	chr1_28905216_28905217_A	0	-
chr1	28905217	28905218	chr1_28905217_28905218_C	0	-
chr1	28905218	28905219	chr1_28905218_28905219_A	0	-
chr1	28905219	28905220	chr1_28905219_28905220_A	0	-
chr1	28905220	28905221	chr1_28905220_28905221_T	0	-
chr1	28905222	28905223	chr1_28905222_28905223_A	0	-
chr1	28906121	28906122	chr1_28906121_28906122_A	0	-
chr1	28906125	28906126	chr1_28906125_28906126_A	0	-
chr1	28906127	28906128	chr1_28906127_28906128_T	0	-
chr1	28906493	28906494	chr1_28906493_28906494_G	0	-
chr1	28906509	28906510	chr1_28906509_28906510_A	0	-
chr1	28906515	28906516	chr1_28906515_28906516_A	0	-
chr1	28907183	28907184	chr1_28907183_28907184_A	0	-
chr1	28907184	28907185	chr1_28907184_28907185_G	0	-
chr1	28907185	28907186	chr1_28907185_28907186_T	0	-
chr1	28907186	28907187	chr1_28907186_28907187_A	0	-
chr1	28907188	28907189	chr1_28907188_28907189_T	0	-
chr1	28907193	28907194	chr1_28907193_28907194_A	0	-
chr1	28907204	28907205	chr1_28907204_28907205_G	0	-
chr1	28907356	28907357	chr1_28907356_28907357_A	0	-
chr1	28907768	28907769	chr1_28907768_28907769_A	0	-
chr1	28907769	28907770	chr1_28907769_28907770_A	0	-
chr1	28907770	28907771	chr1_28907770_28907771_T	0	-
chr1	28907773	28907774	chr1_28907773_28907774_A	0	-
chr1	28907774	28907775	chr1_28907774_28907775_A	0	-
chr1	28931995	28931996	chr1_28931995_28931996_T	0	-
chr1	28931998	28931999	chr1_28931998_28931999_A	0	-
chr1	28931999	28932000	chr1_28931999_28932000_T	0	-
chr1	29040558	29040559	chr1_29040558_29040559_A	0	+
chr1	29064099	29064100	chr1_29064099_29064100_T	0	+
chr1	29064100	29064101	chr1_29064100_29064101_A	0	+
chr1	29064748	29064749	chr1_29064748_29064749_A	0	+
chr1	29323725	29323726	chr1_29323725_29323726_G	0	+
chr1	29385061	29385062	chr1_29385061_29385062_A	0	+
chr1	29386891	29386892	chr1_29386891_29386892_A	0	+
chr1	29391454	29391455	chr1_29391454_29391455_A	0	+
chr1	29442178	29442179	chr1_29442178_29442179_T	0	+
chr1	29442180	29442181	chr1_29442180_29442181_C	0	+
chr1	29442184	29442185	chr1_29442184_29442185_A	0	+
chr1	29448379	29448380	chr1_29448379_29448380_C	0	-
chr1	29448388	29448389	chr1_29448388_29448389_A	0	-
chr1	29475759	29475760	chr1_29475759_29475760_A	0	-
chr1	29475761	29475762	chr1_29475761_29475762_A	0	-
chr1	29475763	29475764	chr1_29475763_29475764_A	0	-
chr1	29475765	29475766	chr1_29475765_29475766_A	0	-
chr1	29481451	29481452	chr1_29481451_29481452_T	0	-
chr1	29492603	29492604	chr1_29492603_29492604_A	0	-
chr1	29492604	29492605	chr1_29492604_29492605_A	0	-
chr1	29520713	29520714	chr1_29520713_29520714_T	0	-
chr1	29520731	29520732	chr1_29520731_29520732_A	0	-
chr1	29522545	29522546	chr1_29522545_29522546_A	0	-
chr1	29522548	29522549	chr1_29522548_29522549_A	0	-
chr1	29522555	29522556	chr1_29522555_29522556_A	0	-
chr1	29527127	29527128	chr1_29527127_29527128_C	0	-
chr1	29527128	29527129	chr1_29527128_29527129_C	0	-
chr1	29528057	29528058	chr1_29528057_29528058_T	0	-
chr1	29528582	29528583	chr1_29528582_29528583_A	0	-
chr1	29547447	29547448	chr1_29547447_29547448_A	0	-
chr1	29584994	29584995	chr1_29584994_29584995_C	0	+
chr1	29585749	29585750	chr1_29585749_29585750_A	0	+
chr1	29586355	29586356	chr1_29586355_29586356_T	0	+
chr1	29605939	29605940	chr1_29605939_29605940_C	0	+
chr1	29605942	29605943	chr1_29605942_29605943_A	0	+
chr1	29610429	29610430	chr1_29610429_29610430_A	0	+
chr1	29637940	29637941	chr1_29637940_29637941_A	0	+
chr1	29642493	29642494	chr1_29642493_29642494_A	0	+
chr1	31350039	31350040	chr1_31350039_31350040_G	0	-
chr1	31414148	31414149	chr1_31414148_31414149_A	0	-
chr1	31414154	31414155	chr1_31414154_31414155_A	0	-
chr1	31418360	31418361	chr1_31418360_31418361_A	0	-
chr1	31418364	31418365	chr1_31418364_31418365_T	0	-
chr1	31423135	31423136	chr1_31423135_31423136_A	0	-
chr1	31423140	31423141	chr1_31423140_31423141_A	0	-
chr1	31437777	31437778	chr1_31437777_31437778_A	0	-
chr1	31437783	31437784	chr1_31437783_31437784_A	0	-
chr1	31437823	31437824	chr1_31437823_31437824_A	0	-
chr1	31439062	31439063	chr1_31439062_31439063_G	0	-
chr1	31440192	31440193	chr1_31440192_31440193_A	0	-
chr1	31447653	31447654	chr1_31447653_31447654_T	0	-
chr1	31447670	31447671	chr1_31447670_31447671_A	0	-
chr1	31478900	31478901	chr1_31478900_31478901_A	0	-
chr1	31478903	31478904	chr1_31478903_31478904_A	0	-
chr1	31478908	31478909	chr1_31478908_31478909_A	0	-
chr1	31742105	31742106	chr1_31742105_31742106_A	0	-
chr1	31762297	31762298	chr1_31762297_31762298_A	0	-
chr1	31762301	31762302	chr1_31762301_31762302_A	0	-
chr1	31762315	31762316	chr1_31762315_31762316_T	0	-
chr1	31764874	31764875	chr1_31764874_31764875_A	0	-
chr1	31766218	31766219	chr1_31766218_31766219_A	0	-
chr1	31819463	31819464	chr1_31819463_31819464_A	0	+
chr1	31821651	31821652	chr1_31821651_31821652_A	0	+
chr1	31898142	31898143	chr1_31898142_31898143_A	0	+
chr1	31898570	31898571	chr1_31898570_31898571_A	0	+
chr1	31899467	31899468	chr1_31899467_31899468_A	0	+
chr1	31899473	31899474	chr1_31899473_31899474_T	0	+
chr1	31902218	31902219	chr1_31902218_31902219_A	0	+
chr1	31902223	31902224	chr1_31902223_31902224_G	0	+
chr1	31902224	31902225	chr1_31902224_31902225_A	0	+
chr1	32042713	32042714	chr1_32042713_32042714_C	0	+
chr1	32042714	32042715	chr1_32042714_32042715_C	0	+
chr1	32096422	32096423	chr1_32096422_32096423_A	0	-
chr1	32096487	32096488	chr1_32096487_32096488_A	0	-
chr1	32098259	32098260	chr1_32098259_32098260_C	0	-
chr1	32098264	32098265	chr1_32098264_32098265_C	0	-
chr1	32098270	32098271	chr1_32098270_32098271_C	0	-
chr1	32098274	32098275	chr1_32098274_32098275_A	0	-
chr1	32098276	32098277	chr1_32098276_32098277_T	0	-
chr1	32098939	32098940	chr1_32098939_32098940_A	0	-
chr1	32098967	32098968	chr1_32098967_32098968_A	0	-
chr1	32118477	32118478	chr1_32118477_32118478_C	0	-
chr1	32118497	32118498	chr1_32118497_32118498_A	0	-
chr1	32119674	32119675	chr1_32119674_32119675_A	0	-
chr1	32126265	32126266	chr1_32126265_32126266_A	0	-
chr1	32131238	32131239	chr1_32131238_32131239_C	0	-
chr1	32133845	32133846	chr1_32133845_32133846_A	0	-
chr1	32145306	32145307	chr1_32145306_32145307_A	0	-
chr1	32145723	32145724	chr1_32145723_32145724_A	0	-
chr1	32145911	32145912	chr1_32145911_32145912_A	0	-
chr1	32148992	32148993	chr1_32148992_32148993_A	0	-
chr1	32154127	32154128	chr1_32154127_32154128_A	0	-
chr1	32155474	32155475	chr1_32155474_32155475_A	0	-
chr1	32157698	32157699	chr1_32157698_32157699_A	0	-
chr1	32158780	32158781	chr1_32158780_32158781_A	0	-
chr1	32159794	32159795	chr1_32159794_32159795_A	0	-
chr1	32161770	32161771	chr1_32161770_32161771_A	0	-
chr1	32162929	32162930	chr1_32162929_32162930_A	0	-
chr1	32193236	32193237	chr1_32193236_32193237_A	0	-
chr1	32197047	32197048	chr1_32197047_32197048_A	0	-
chr1	32197799	32197800	chr1_32197799_32197800_A	0	-
chr1	32197801	32197802	chr1_32197801_32197802_A	0	-
chr1	32198234	32198235	chr1_32198234_32198235_A	0	-
chr1	32198270	32198271	chr1_32198270_32198271_A	0	-
chr1	32203377	32203378	chr1_32203377_32203378_A	0	-
chr1	32203949	32203950	chr1_32203949_32203950_A	0	-
chr1	32206166	32206167	chr1_32206166_32206167_A	0	-
chr1	32207850	32207851	chr1_32207850_32207851_A	0	-
chr1	32222435	32222436	chr1_32222435_32222436_A	0	-
chr1	32263947	32263948	chr1_32263947_32263948_A	0	-
chr1	32374584	32374585	chr1_32374584_32374585_A	0	-
chr1	32374591	32374592	chr1_32374591_32374592_A	0	-
chr1	32375734	32375735	chr1_32375734_32375735_A	0	-
chr1	32381612	32381613	chr1_32381612_32381613_A	0	-
chr1	32385275	32385276	chr1_32385275_32385276_A	0	-
chr1	32385284	32385285	chr1_32385284_32385285_A	0	-
chr1	32498764	32498765	chr1_32498764_32498765_A	0	+
chr1	32503405	32503406	chr1_32503405_32503406_C	0	+
chr1	32503407	32503408	chr1_32503407_32503408_C	0	+
chr1	32503409	32503410	chr1_32503409_32503410_A	0	+
chr1	32503413	32503414	chr1_32503413_32503414_A	0	+
chr1	32503414	32503415	chr1_32503414_32503415_A	0	+
chr1	32503419	32503420	chr1_32503419_32503420_A	0	+
chr1	32503430	32503431	chr1_32503430_32503431_T	0	+
chr1	32503434	32503435	chr1_32503434_32503435_G	0	+
chr1	32504116	32504117	chr1_32504116_32504117_A	0	+
chr1	32504120	32504121	chr1_32504120_32504121_T	0	+
chr1	32504122	32504123	chr1_32504122_32504123_T	0	+
chr1	32504123	32504124	chr1_32504123_32504124_A	0	+
chr1	32504128	32504129	chr1_32504128_32504129_A	0	+
chr1	32505093	32505094	chr1_32505093_32505094_A	0	+
chr1	32541177	32541178	chr1_32541177_32541178_T	0	+
chr1	32541240	32541241	chr1_32541240_32541241_G	0	+
chr1	32542737	32542738	chr1_32542737_32542738_A	0	+
[truncated: 75,668 more rows]

## Sheet: Match+Error
Chromosome	Start	Stop	ID	Score	Strand
chr1	91661	91662	chr1_91661_91662_A	0	-
chr1	169295	169296	chr1_169295_169296_A	0	-
chr1	320859	320860	chr1_320859_320860_A	0	+
chr1	705123	705124	chr1_705123_705124_A	0	-
chr1	708510	708511	chr1_708510_708511_A	0	-
chr1	717289	717290	chr1_717289_717290_A	0	+
chr1	784824	784825	chr1_784824_784825_A	0	+
chr1	788027	788028	chr1_788027_788028_A	0	+
chr1	850139	850140	chr1_850139_850140_A	0	+
chr1	861273	861274	chr1_861273_861274_A	0	+
chr1	866388	866389	chr1_866388_866389_A	0	+
chr1	866391	866392	chr1_866391_866392_A	0	+
chr1	876501	876502	chr1_876501_876502_A	0	+
chr1	878598	878599	chr1_878598_878599_A	0	+
chr1	878610	878611	chr1_878610_878611_A	0	+
chr1	878614	878615	chr1_878614_878615_A	0	+
chr1	879051	879052	chr1_879051_879052_T	0	+
chr1	879053	879054	chr1_879053_879054_A	0	+
chr1	880204	880205	chr1_880204_880205_A	0	-
chr1	880546	880547	chr1_880546_880547_A	0	-
chr1	880550	880551	chr1_880550_880551_A	0	-
chr1	880552	880553	chr1_880552_880553_A	0	-
chr1	881062	881063	chr1_881062_881063_A	0	-
chr1	881941	881942	chr1_881941_881942_A	0	-
chr1	881949	881950	chr1_881949_881950_A	0	-
chr1	887538	887539	chr1_887538_887539_A	0	-
chr1	887540	887541	chr1_887540_887541_T	0	-
chr1	887997	887998	chr1_887997_887998_A	0	-
chr1	887998	887999	chr1_887998_887999_G	0	-
chr1	888013	888014	chr1_888013_888014_A	0	-
chr1	891621	891622	chr1_891621_891622_A	0	-
chr1	899172	899173	chr1_899172_899173_A	0	+
chr1	899268	899269	chr1_899268_899269_T	0	+
chr1	908855	908856	chr1_908855_908856_A	0	+
chr1	977312	977313	chr1_977312_977313_A	0	+
chr1	980508	980509	chr1_980508_980509_A	0	+
chr1	980516	980517	chr1_980516_980517_T	0	+
chr1	981081	981082	chr1_981081_981082_A	0	+
chr1	981086	981087	chr1_981086_981087_A	0	+
chr1	981087	981088	chr1_981087_981088_C	0	+
chr1	981091	981092	chr1_981091_981092_C	0	+
chr1	982688	982689	chr1_982688_982689_A	0	+
chr1	982934	982935	chr1_982934_982935_G	0	+
chr1	989112	989113	chr1_989112_989113_A	0	+
chr1	989800	989801	chr1_989800_989801_A	0	+
chr1	990181	990182	chr1_990181_990182_A	0	+
chr1	995640	995641	chr1_995640_995641_A	0	+
chr1	1018393	1018394	chr1_1018393_1018394_A	0	-
chr1	1019488	1019489	chr1_1019488_1019489_C	0	-
chr1	1019490	1019491	chr1_1019490_1019491_T	0	-
chr1	1019501	1019502	chr1_1019501_1019502_A	0	-
chr1	1019908	1019909	chr1_1019908_1019909_A	0	-
chr1	1019914	1019915	chr1_1019914_1019915_A	0	-
chr1	1021409	1021410	chr1_1021409_1021410_A	0	-
chr1	1022606	1022607	chr1_1022606_1022607_C	0	-
chr1	1025826	1025827	chr1_1025826_1025827_A	0	-
chr1	1153090	1153091	chr1_1153090_1153091_A	0	-
chr1	1153215	1153216	chr1_1153215_1153216_A	0	-
chr1	1154327	1154328	chr1_1154327_1154328_C	0	-
chr1	1191526	1191527	chr1_1191526_1191527_A	0	-
chr1	1191528	1191529	chr1_1191528_1191529_T	0	-
chr1	1222125	1222126	chr1_1222125_1222126_A	0	+
chr1	1230025	1230026	chr1_1230025_1230026_A	0	-
chr1	1232032	1232033	chr1_1232032_1232033_A	0	-
chr1	1233509	1233510	chr1_1233509_1233510_A	0	-
chr1	1236103	1236104	chr1_1236103_1236104_A	0	-
chr1	1237449	1237450	chr1_1237449_1237450_A	0	-
chr1	1238682	1238683	chr1_1238682_1238683_A	0	-
chr1	1244813	1244814	chr1_1244813_1244814_A	0	+
chr1	1244819	1244820	chr1_1244819_1244820_A	0	+
chr1	1246685	1246686	chr1_1246685_1246686_A	0	+
chr1	1247770	1247771	chr1_1247770_1247771_A	0	-
chr1	1248522	1248523	chr1_1248522_1248523_G	0	-
chr1	1248523	1248524	chr1_1248523_1248524_A	0	-
chr1	1248524	1248525	chr1_1248524_1248525_G	0	-
chr1	1249319	1249320	chr1_1249319_1249320_C	0	-
chr1	1249320	1249321	chr1_1249320_1249321_A	0	-
chr1	1249322	1249323	chr1_1249322_1249323_T	0	-
chr1	1249764	1249765	chr1_1249764_1249765_C	0	-
chr1	1249767	1249768	chr1_1249767_1249768_C	0	-
chr1	1250364	1250365	chr1_1250364_1250365_A	0	-
chr1	1254830	1254831	chr1_1254830_1254831_A	0	-
chr1	1255928	1255929	chr1_1255928_1255929_A	0	-
chr1	1255929	1255930	chr1_1255929_1255930_A	0	-
chr1	1255934	1255935	chr1_1255934_1255935_A	0	-
chr1	1255935	1255936	chr1_1255935_1255936_A	0	-
chr1	1271928	1271929	chr1_1271928_1271929_A	0	-
chr1	1274056	1274057	chr1_1274056_1274057_A	0	-
chr1	1274057	1274058	chr1_1274057_1274058_A	0	-
chr1	1275897	1275898	chr1_1275897_1275898_A	0	-
chr1	1275898	1275899	chr1_1275898_1275899_G	0	-
chr1	1275904	1275905	chr1_1275904_1275905_A	0	-
chr1	1277213	1277214	chr1_1277213_1277214_A	0	-
chr1	1277555	1277556	chr1_1277555_1277556_A	0	-
chr1	1277882	1277883	chr1_1277882_1277883_A	0	-
chr1	1309848	1309849	chr1_1309848_1309849_A	0	-
chr1	1310195	1310196	chr1_1310195_1310196_G	0	-
chr1	1322992	1322993	chr1_1322992_1322993_A	0	-
chr1	1326269	1326270	chr1_1326269_1326270_A	0	-
chr1	1326972	1326973	chr1_1326972_1326973_A	0	-
chr1	1328213	1328214	chr1_1328213_1328214_A	0	-
chr1	1328862	1328863	chr1_1328862_1328863_A	0	-
chr1	1333752	1333753	chr1_1333752_1333753_A	0	-
chr1	1335328	1335329	chr1_1335328_1335329_A	0	+
chr1	1335954	1335955	chr1_1335954_1335955_T	0	+
chr1	1335957	1335958	chr1_1335957_1335958_A	0	+
chr1	1341291	1341292	chr1_1341291_1341292_A	0	-
chr1	1414273	1414274	chr1_1414273_1414274_T	0	+
chr1	1414396	1414397	chr1_1414396_1414397_A	0	+
chr1	1417493	1417494	chr1_1417493_1417494_A	0	+
chr1	1417902	1417903	chr1_1417902_1417903_C	0	+
chr1	1417903	1417904	chr1_1417903_1417904_A	0	+
chr1	1421128	1421129	chr1_1421128_1421129_G	0	+
chr1	1421129	1421130	chr1_1421129_1421130_A	0	+
chr1	1421133	1421134	chr1_1421133_1421134_A	0	+
chr1	1421134	1421135	chr1_1421134_1421135_A	0	+
chr1	1421143	1421144	chr1_1421143_1421144_C	0	+
chr1	1421433	1421434	chr1_1421433_1421434_A	0	+
chr1	1421455	1421456	chr1_1421455_1421456_A	0	+
chr1	1421882	1421883	chr1_1421882_1421883_A	0	+
chr1	1421886	1421887	chr1_1421886_1421887_A	0	+
chr1	1421887	1421888	chr1_1421887_1421888_A	0	+
chr1	1421889	1421890	chr1_1421889_1421890_A	0	+
chr1	1423205	1423206	chr1_1423205_1423206_T	0	+
chr1	1423207	1423208	chr1_1423207_1423208_A	0	+
chr1	1425606	1425607	chr1_1425606_1425607_A	0	+
chr1	1425607	1425608	chr1_1425607_1425608_G	0	+
chr1	1452940	1452941	chr1_1452940_1452941_T	0	+
chr1	1453063	1453064	chr1_1453063_1453064_A	0	+
chr1	1455496	1455497	chr1_1455496_1455497_A	0	+
chr1	1455905	1455906	chr1_1455905_1455906_C	0	+
chr1	1455906	1455907	chr1_1455906_1455907_A	0	+
chr1	1458858	1458859	chr1_1458858_1458859_A	0	+
chr1	1458863	1458864	chr1_1458863_1458864_A	0	+
chr1	1459182	1459183	chr1_1459182_1459183_A	0	+
chr1	1459184	1459185	chr1_1459184_1459185_A	0	+
chr1	1459611	1459612	chr1_1459611_1459612_A	0	+
chr1	1459618	1459619	chr1_1459618_1459619_A	0	+
chr1	1459625	1459626	chr1_1459625_1459626_C	0	+
chr1	1460584	1460585	chr1_1460584_1460585_A	0	+
chr1	1463044	1463045	chr1_1463044_1463045_A	0	+
chr1	1463047	1463048	chr1_1463047_1463048_A	0	+
chr1	1463053	1463054	chr1_1463053_1463054_A	0	+
chr1	1477567	1477568	chr1_1477567_1477568_A	0	-
chr1	1479393	1479394	chr1_1479393_1479394_A	0	-
chr1	1479394	1479395	chr1_1479394_1479395_G	0	-
chr1	1559135	1559136	chr1_1559135_1559136_A	0	+
chr1	1562008	1562009	chr1_1562008_1562009_A	0	+
chr1	1563024	1563025	chr1_1563024_1563025_C	0	+
chr1	1563032	1563033	chr1_1563032_1563033_C	0	+
chr1	1599938	1599939	chr1_1599938_1599939_A	0	-
chr1	1601195	1601196	chr1_1601195_1601196_A	0	-
chr1	1601198	1601199	chr1_1601198_1601199_C	0	-
chr1	1601616	1601617	chr1_1601616_1601617_A	0	-
chr1	1607052	1607053	chr1_1607052_1607053_A	0	-
chr1	1607053	1607054	chr1_1607053_1607054_G	0	-
chr1	1622857	1622858	chr1_1622857_1622858_A	0	-
chr1	1634738	1634739	chr1_1634738_1634739_A	0	-
chr1	1634741	1634742	chr1_1634741_1634742_A	0	-
chr1	1634742	1634743	chr1_1634742_1634743_G	0	-
chr1	1634744	1634745	chr1_1634744_1634745_A	0	-
chr1	1634746	1634747	chr1_1634746_1634747_A	0	-
chr1	1635080	1635081	chr1_1635080_1635081_A	0	-
chr1	1636112	1636113	chr1_1636112_1636113_A	0	-
chr1	1636488	1636489	chr1_1636488_1636489_A	0	-
chr1	1637191	1637192	chr1_1637191_1637192_A	0	-
chr1	1637192	1637193	chr1_1637192_1637193_C	0	-
chr1	1639039	1639040	chr1_1639039_1639040_A	0	-
chr1	1639043	1639044	chr1_1639043_1639044_A	0	-
chr1	1639044	1639045	chr1_1639044_1639045_T	0	-
chr1	1639046	1639047	chr1_1639046_1639047_C	0	-
chr1	1639057	1639058	chr1_1639057_1639058_A	0	-
chr1	1639710	1639711	chr1_1639710_1639711_T	0	-
chr1	1640594	1640595	chr1_1640594_1640595_A	0	-
chr1	1641110	1641111	chr1_1641110_1641111_A	0	-
chr1	1647935	1647936	chr1_1647935_1647936_A	0	-
chr1	1653169	1653170	chr1_1653169_1653170_A	0	-
chr1	1669910	1669911	chr1_1669910_1669911_A	0	-
chr1	1669911	1669912	chr1_1669911_1669912_G	0	-
chr1	1670519	1670520	chr1_1670519_1670520_T	0	-
chr1	1670532	1670533	chr1_1670532_1670533_A	0	-
chr1	1684521	1684522	chr1_1684521_1684522_A	0	-
chr1	1685112	1685113	chr1_1685112_1685113_A	0	-
chr1	1685113	1685114	chr1_1685113_1685114_C	0	-
chr1	1685124	1685125	chr1_1685124_1685125_A	0	-
chr1	1685847	1685848	chr1_1685847_1685848_A	0	-
chr1	1686154	1686155	chr1_1686154_1686155_A	0	-
chr1	1686164	1686165	chr1_1686164_1686165_A	0	-
chr1	1686168	1686169	chr1_1686168_1686169_A	0	-
chr1	1686170	1686171	chr1_1686170_1686171_T	0	-
chr1	1688070	1688071	chr1_1688070_1688071_A	0	-
chr1	1688074	1688075	chr1_1688074_1688075_A	0	-
chr1	1696922	1696923	chr1_1696922_1696923_A	0	-
chr1	1718519	1718520	chr1_1718519_1718520_A	0	-
chr1	1718898	1718899	chr1_1718898_1718899_A	0	-
chr1	1736042	1736043	chr1_1736042_1736043_A	0	-
chr1	1736056	1736057	chr1_1736056_1736057_A	0	-
chr1	1736059	1736060	chr1_1736059_1736060_A	0	-
chr1	1738004	1738005	chr1_1738004_1738005_A	0	-
chr1	2082198	2082199	chr1_2082198_2082199_A	0	+
chr1	2103474	2103475	chr1_2103474_2103475_A	0	+
chr1	2106172	2106173	chr1_2106172_2106173_A	0	+
chr1	2116328	2116329	chr1_2116328_2116329_A	0	+
chr1	2121240	2121241	chr1_2121240_2121241_A	0	-
chr1	2132686	2132687	chr1_2132686_2132687_A	0	-
chr1	2138122	2138123	chr1_2138122_2138123_A	0	-
chr1	2234699	2234700	chr1_2234699_2234700_A	0	+
chr1	2235254	2235255	chr1_2235254_2235255_C	0	+
chr1	2235258	2235259	chr1_2235258_2235259_A	0	+
chr1	2237433	2237434	chr1_2237433_2237434_A	0	+
chr1	2237993	2237994	chr1_2237993_2237994_T	0	+
chr1	2316532	2316533	chr1_2316532_2316533_A	0	-
chr1	2328528	2328529	chr1_2328528_2328529_A	0	+
chr1	2332275	2332276	chr1_2332275_2332276_A	0	+
chr1	2334444	2334445	chr1_2334444_2334445_A	0	+
chr1	2334447	2334448	chr1_2334447_2334448_A	0	+
chr1	2334450	2334451	chr1_2334450_2334451_T	0	+
chr1	2337294	2337295	chr1_2337294_2337295_A	0	-
chr1	2337295	2337296	chr1_2337295_2337296_G	0	-
chr1	2340318	2340319	chr1_2340318_2340319_A	0	-
chr1	2340327	2340328	chr1_2340327_2340328_A	0	-
chr1	2440520	2440521	chr1_2440520_2440521_A	0	-
chr1	2440521	2440522	chr1_2440521_2440522_C	0	-
chr1	2442210	2442211	chr1_2442210_2442211_A	0	-
chr1	2442247	2442248	chr1_2442247_2442248_A	0	-
chr1	2442851	2442852	chr1_2442851_2442852_A	0	-
chr1	2443148	2443149	chr1_2443148_2443149_A	0	-
chr1	2444504	2444505	chr1_2444504_2444505_A	0	-
chr1	2445928	2445929	chr1_2445928_2445929_A	0	-
chr1	2447187	2447188	chr1_2447187_2447188_A	0	-
chr1	2450057	2450058	chr1_2450057_2450058_A	0	-
chr1	2450063	2450064	chr1_2450063_2450064_A	0	-
chr1	2450065	2450066	chr1_2450065_2450066_A	0	-
chr1	2452772	2452773	chr1_2452772_2452773_C	0	-
chr1	2452775	2452776	chr1_2452775_2452776_C	0	-
chr1	2452779	2452780	chr1_2452779_2452780_G	0	-
chr1	2452785	2452786	chr1_2452785_2452786_A	0	-
chr1	2452787	2452788	chr1_2452787_2452788_A	0	-
chr1	2520341	2520342	chr1_2520341_2520342_T	0	+
chr1	3383707	3383708	chr1_3383707_3383708_A	0	+
chr1	3385416	3385417	chr1_3385416_3385417_A	0	+
chr1	3394968	3394969	chr1_3394968_3394969_A	0	+
chr1	3396982	3396983	chr1_3396982_3396983_A	0	+
chr1	3407549	3407550	chr1_3407549_3407550_A	0	-
chr1	3410744	3410745	chr1_3410744_3410745_A	0	-
chr1	3412603	3412604	chr1_3412603_3412604_A	0	-
chr1	3413943	3413944	chr1_3413943_3413944_A	0	-
chr1	3425279	3425280	chr1_3425279_3425280_A	0	-
chr1	3428290	3428291	chr1_3428290_3428291_A	0	-
chr1	3542255	3542256	chr1_3542255_3542256_A	0	+
chr1	3551878	3551879	chr1_3551878_3551879_A	0	-
chr1	3551879	3551880	chr1_3551879_3551880_A	0	-
chr1	3552640	3552641	chr1_3552640_3552641_A	0	-
chr1	3563386	3563387	chr1_3563386_3563387_A	0	-
chr1	3644664	3644665	chr1_3644664_3644665_A	0	+
chr1	3692334	3692335	chr1_3692334_3692335_A	0	+
chr1	3698198	3698199	chr1_3698198_3698199_A	0	-
chr1	3699357	3699358	chr1_3699357_3699358_A	0	-
chr1	3700703	3700704	chr1_3700703_3700704_A	0	-
chr1	3701787	3701788	chr1_3701787_3701788_A	0	-
chr1	3701789	3701790	chr1_3701789_3701790_T	0	-
chr1	3732106	3732107	chr1_3732106_3732107_A	0	-
chr1	3740147	3740148	chr1_3740147_3740148_T	0	-
chr1	3743020	3743021	chr1_3743020_3743021_A	0	-
chr1	3745960	3745961	chr1_3745960_3745961_A	0	-
chr1	3753283	3753284	chr1_3753283_3753284_A	0	-
chr1	3753289	3753290	chr1_3753289_3753290_C	0	-
chr1	3754104	3754105	chr1_3754104_3754105_A	0	-
chr1	3756369	3756370	chr1_3756369_3756370_A	0	-
chr1	3786144	3786145	chr1_3786144_3786145_A	0	+
chr1	5924120	5924121	chr1_5924120_5924121_A	0	-
chr1	5924121	5924122	chr1_5924121_5924122_C	0	-
chr1	5926541	5926542	chr1_5926541_5926542_A	0	-
chr1	5927192	5927193	chr1_5927192_5927193_A	0	-
chr1	5967304	5967305	chr1_5967304_5967305_A	0	-
chr1	6027451	6027452	chr1_6027451_6027452_A	0	-
chr1	6149039	6149040	chr1_6149039_6149040_C	0	+
chr1	6150421	6150422	chr1_6150421_6150422_A	0	+
chr1	6157306	6157307	chr1_6157306_6157307_A	0	+
chr1	6158521	6158522	chr1_6158521_6158522_T	0	+
chr1	6253139	6253140	chr1_6253139_6253140_A	0	-
chr1	6266569	6266570	chr1_6266569_6266570_G	0	+
chr1	6266573	6266574	chr1_6266573_6266574_C	0	+
chr1	6271903	6271904	chr1_6271903_6271904_A	0	+
chr1	6272271	6272272	chr1_6272271_6272272_A	0	+
chr1	6272718	6272719	chr1_6272718_6272719_A	0	+
chr1	6272719	6272720	chr1_6272719_6272720_A	0	+
chr1	6279275	6279276	chr1_6279275_6279276_A	0	+
chr1	6292213	6292214	chr1_6292213_6292214_A	0	-
chr1	6294601	6294602	chr1_6294601_6294602_A	0	-
chr1	6296993	6296994	chr1_6296993_6296994_A	0	+
chr1	6310085	6310086	chr1_6310085_6310086_A	0	-
chr1	6324783	6324784	chr1_6324783_6324784_A	0	-
chr1	6522258	6522259	chr1_6522258_6522259_A	0	-
chr1	6522750	6522751	chr1_6522750_6522751_A	0	-
chr1	6524813	6524814	chr1_6524813_6524814_A	0	-
chr1	6525632	6525633	chr1_6525632_6525633_A	0	-
chr1	6525638	6525639	chr1_6525638_6525639_A	0	-
chr1	6528666	6528667	chr1_6528666_6528667_A	0	-
chr1	6529778	6529779	chr1_6529778_6529779_A	0	-
chr1	6529779	6529780	chr1_6529779_6529780_G	0	-
chr1	6529893	6529894	chr1_6529893_6529894_A	0	-
chr1	6530437	6530438	chr1_6530437_6530438_A	0	-
chr1	6531192	6531193	chr1_6531192_6531193_A	0	-
chr1	6531888	6531889	chr1_6531888_6531889_C	0	-
chr1	6531889	6531890	chr1_6531889_6531890_A	0	-
chr1	6535601	6535602	chr1_6535601_6535602_C	0	-
chr1	6535602	6535603	chr1_6535602_6535603_G	0	-
chr1	6535608	6535609	chr1_6535608_6535609_G	0	-
chr1	6535609	6535610	chr1_6535609_6535610_A	0	-
chr1	6586088	6586089	chr1_6586088_6586089_A	0	-
chr1	6586090	6586091	chr1_6586090_6586091_C	0	-
chr1	6586097	6586098	chr1_6586097_6586098_A	0	-
chr1	6586916	6586917	chr1_6586916_6586917_A	0	-
chr1	6589249	6589250	chr1_6589249_6589250_A	0	-
chr1	6592162	6592163	chr1_6592162_6592163_A	0	-
chr1	6592836	6592837	chr1_6592836_6592837_A	0	-
chr1	6592846	6592847	chr1_6592846_6592847_A	0	-
chr1	6593528	6593529	chr1_6593528_6593529_A	0	-
chr1	6602032	6602033	chr1_6602032_6602033_A	0	-
chr1	6646627	6646628	chr1_6646627_6646628_C	0	+
chr1	6646628	6646629	chr1_6646628_6646629_C	0	+
chr1	6646629	6646630	chr1_6646629_6646630_A	0	+
chr1	6646630	6646631	chr1_6646630_6646631_C	0	+
chr1	6646720	6646721	chr1_6646720_6646721_T	0	+
chr1	6646722	6646723	chr1_6646722_6646723_A	0	+
chr1	6647244	6647245	chr1_6647244_6647245_A	0	+
chr1	6648087	6648088	chr1_6648087_6648088_A	0	+
chr1	6648787	6648788	chr1_6648787_6648788_A	0	+
chr1	6648794	6648795	chr1_6648794_6648795_A	0	+
chr1	6679838	6679839	chr1_6679838_6679839_A	0	+
chr1	6681451	6681452	chr1_6681451_6681452_A	0	+
chr1	6690321	6690322	chr1_6690321_6690322_A	0	+
chr1	6692825	6692826	chr1_6692825_6692826_A	0	+
chr1	6692839	6692840	chr1_6692839_6692840_A	0	+
chr1	6692840	6692841	chr1_6692840_6692841_C	0	+
chr1	6697589	6697590	chr1_6697589_6697590_A	0	-
chr1	6698452	6698453	chr1_6698452_6698453_A	0	-
chr1	6704755	6704756	chr1_6704755_6704756_A	0	-
chr1	6704757	6704758	chr1_6704757_6704758_A	0	-
chr1	6704758	6704759	chr1_6704758_6704759_C	0	-
chr1	6705202	6705203	chr1_6705202_6705203_A	0	-
chr1	6705204	6705205	chr1_6705204_6705205_G	0	-
chr1	6705207	6705208	chr1_6705207_6705208_C	0	-
chr1	6705210	6705211	chr1_6705210_6705211_A	0	-
chr1	6705214	6705215	chr1_6705214_6705215_A	0	-
chr1	6705215	6705216	chr1_6705215_6705216_C	0	-
chr1	6705217	6705218	chr1_6705217_6705218_G	0	-
chr1	6706071	6706072	chr1_6706071_6706072_A	0	-
chr1	6711689	6711690	chr1_6711689_6711690_A	0	-
chr1	6713028	6713029	chr1_6713028_6713029_A	0	-
chr1	6713031	6713032	chr1_6713031_6713032_A	0	-
chr1	7833476	7833477	chr1_7833476_7833477_A	0	+
chr1	7838155	7838156	chr1_7838155_7838156_A	0	+
chr1	7838159	7838160	chr1_7838159_7838160_A	0	+
chr1	7844676	7844677	chr1_7844676_7844677_C	0	+
chr1	7845473	7845474	chr1_7845473_7845474_A	0	+
chr1	7848071	7848072	chr1_7848071_7848072_A	0	+
chr1	7870460	7870461	chr1_7870460_7870461_A	0	+
chr1	7895796	7895797	chr1_7895796_7895797_A	0	+
chr1	7897035	7897036	chr1_7897035_7897036_A	0	+
chr1	8044921	8044922	chr1_8044921_8044922_A	0	+
chr1	8074476	8074477	chr1_8074476_8074477_A	0	-
chr1	8415684	8415685	chr1_8415684_8415685_A	0	-
chr1	8416330	8416331	chr1_8416330_8416331_A	0	-
chr1	8418997	8418998	chr1_8418997_8418998_A	0	-
chr1	8418998	8418999	chr1_8418998_8418999_C	0	-
chr1	8421572	8421573	chr1_8421572_8421573_A	0	-
chr1	8421574	8421575	chr1_8421574_8421575_C	0	-
chr1	8421578	8421579	chr1_8421578_8421579_A	0	-
chr1	8421958	8421959	chr1_8421958_8421959_C	0	-
chr1	8421964	8421965	chr1_8421964_8421965_A	0	-
chr1	8482892	8482893	chr1_8482892_8482893_A	0	-
chr1	8482894	8482895	chr1_8482894_8482895_A	0	-
chr1	8921533	8921534	chr1_8921533_8921534_A	0	-
chr1	8921534	8921535	chr1_8921534_8921535_G	0	-
chr1	8921535	8921536	chr1_8921535_8921536_T	0	-
chr1	8923024	8923025	chr1_8923024_8923025_A	0	-
chr1	8923026	8923027	chr1_8923026_8923027_A	0	-
chr1	8923030	8923031	chr1_8923030_8923031_A	0	-
chr1	8923402	8923403	chr1_8923402_8923403_G	0	-
chr1	8923426	8923427	chr1_8923426_8923427_A	0	-
chr1	8923431	8923432	chr1_8923431_8923432_A	0	-
chr1	8924172	8924173	chr1_8924172_8924173_A	0	-
chr1	8924176	8924177	chr1_8924176_8924177_A	0	-
chr1	8924178	8924179	chr1_8924178_8924179_T	0	-
chr1	8925555	8925556	chr1_8925555_8925556_A	0	-
chr1	8925565	8925566	chr1_8925565_8925566_A	0	-
chr1	8925566	8925567	chr1_8925566_8925567_A	0	-
chr1	8925567	8925568	chr1_8925567_8925568_A	0	-
chr1	8925600	8925601	chr1_8925600_8925601_A	0	-
chr1	8926585	8926586	chr1_8926585_8926586_A	0	-
chr1	8926586	8926587	chr1_8926586_8926587_C	0	-
chr1	8926595	8926596	chr1_8926595_8926596_A	0	-
chr1	8927332	8927333	chr1_8927332_8927333_C	0	-
chr1	8927335	8927336	chr1_8927335_8927336_A	0	-
chr1	8927337	8927338	chr1_8927337_8927338_T	0	-
chr1	8927340	8927341	chr1_8927340_8927341_A	0	-
chr1	8927342	8927343	chr1_8927342_8927343_T	0	-
chr1	8927355	8927356	chr1_8927355_8927356_G	0	-
chr1	8928136	8928137	chr1_8928136_8928137_A	0	-
chr1	8928143	8928144	chr1_8928143_8928144_A	0	-
chr1	8930587	8930588	chr1_8930587_8930588_A	0	-
chr1	8930592	8930593	chr1_8930592_8930593_A	0	-
chr1	8932070	8932071	chr1_8932070_8932071_A	0	-
chr1	8932077	8932078	chr1_8932077_8932078_A	0	-
chr1	8935008	8935009	chr1_8935008_8935009_A	0	-
chr1	9306999	9307000	chr1_9306999_9307000_A	0	+
chr1	9323542	9323543	chr1_9323542_9323543_A	0	+
chr1	9656891	9656892	chr1_9656891_9656892_C	0	+
chr1	9662105	9662106	chr1_9662105_9662106_A	0	+
chr1	9667575	9667576	chr1_9667575_9667576_T	0	+
chr1	9670538	9670539	chr1_9670538_9670539_A	0	+
chr1	9673023	9673024	chr1_9673023_9673024_A	0	+
chr1	9777569	9777570	chr1_9777569_9777570_A	0	+
chr1	9780653	9780654	chr1_9780653_9780654_A	0	+
chr1	9783995	9783996	chr1_9783995_9783996_A	0	+
chr1	9790788	9790789	chr1_9790788_9790789_A	0	-
chr1	9791467	9791468	chr1_9791467_9791468_G	0	-
chr1	9791472	9791473	chr1_9791472_9791473_A	0	-
chr1	9791473	9791474	chr1_9791473_9791474_C	0	-
chr1	9791475	9791476	chr1_9791475_9791476_C	0	-
chr1	9791477	9791478	chr1_9791477_9791478_C	0	-
chr1	9791479	9791480	chr1_9791479_9791480_A	0	-
chr1	9791979	9791980	chr1_9791979_9791980_A	0	-
chr1	9793640	9793641	chr1_9793640_9793641_A	0	-
chr1	9794227	9794228	chr1_9794227_9794228_A	0	-
chr1	9795700	9795701	chr1_9795700_9795701_C	0	-
chr1	9795706	9795707	chr1_9795706_9795707_A	0	-
chr1	9795708	9795709	chr1_9795708_9795709_T	0	-
chr1	9796127	9796128	chr1_9796127_9796128_A	0	-
chr1	9801343	9801344	chr1_9801343_9801344_A	0	-
chr1	9804081	9804082	chr1_9804081_9804082_A	0	-
chr1	9804085	9804086	chr1_9804085_9804086_A	0	-
chr1	9804720	9804721	chr1_9804720_9804721_A	0	-
chr1	9809994	9809995	chr1_9809994_9809995_A	0	-
chr1	9992056	9992057	chr1_9992056_9992057_A	0	-
chr1	9992983	9992984	chr1_9992983_9992984_A	0	-
chr1	9994942	9994943	chr1_9994942_9994943_A	0	-
chr1	9996720	9996721	chr1_9996720_9996721_A	0	-
chr1	10002866	10002867	chr1_10002866_10002867_A	0	-
chr1	10002883	10002884	chr1_10002883_10002884_A	0	-
chr1	10035629	10035630	chr1_10035629_10035630_A	0	+
chr1	10155494	10155495	chr1_10155494_10155495_A	0	+
chr1	10165544	10165545	chr1_10165544_10165545_A	0	+
chr1	10197100	10197101	chr1_10197100_10197101_A	0	+
chr1	10206984	10206985	chr1_10206984_10206985_A	0	+
chr1	10211347	10211348	chr1_10211347_10211348_A	0	+
chr1	10218389	10218390	chr1_10218389_10218390_A	0	+
chr1	10239916	10239917	chr1_10239916_10239917_T	0	+
chr1	10239928	10239929	chr1_10239928_10239929_A	0	+
chr1	10239933	10239934	chr1_10239933_10239934_C	0	+
chr1	10316277	10316278	chr1_10316277_10316278_A	0	+
chr1	10332267	10332268	chr1_10332267_10332268_A	0	+
chr1	10332270	10332271	chr1_10332270_10332271_A	0	+
chr1	10338014	10338015	chr1_10338014_10338015_A	0	+
chr1	10397101	10397102	chr1_10397101_10397102_A	0	+
chr1	10412663	10412664	chr1_10412663_10412664_C	0	+
chr1	10421722	10421723	chr1_10421722_10421723_A	0	+
chr1	10435281	10435282	chr1_10435281_10435282_A	0	+
chr1	10459652	10459653	chr1_10459652_10459653_A	0	+
chr1	10460430	10460431	chr1_10460430_10460431_A	0	+
chr1	10473088	10473089	chr1_10473088_10473089_A	0	+
chr1	10477407	10477408	chr1_10477407_10477408_A	0	+
chr1	10477410	10477411	chr1_10477410_10477411_A	0	+
chr1	10479446	10479447	chr1_10479446_10479447_A	0	+
chr1	10521781	10521782	chr1_10521781_10521782_A	0	-
chr1	10523291	10523292	chr1_10523291_10523292_A	0	-
chr1	10689561	10689562	chr1_10689561_10689562_A	0	+
chr1	10703392	10703393	chr1_10703392_10703393_A	0	-
chr1	11073734	11073735	chr1_11073734_11073735_A	0	+
chr1	11073749	11073750	chr1_11073749_11073750_A	0	+
chr1	11073753	11073754	chr1_11073753_11073754_A	0	+
chr1	11082146	11082147	chr1_11082146_11082147_A	0	+
chr1	11082147	11082148	chr1_11082147_11082148_A	0	+
chr1	11116176	11116177	chr1_11116176_11116177_A	0	-
chr1	11116178	11116179	chr1_11116178_11116179_T	0	-
chr1	11116842	11116843	chr1_11116842_11116843_C	0	-
chr1	11119420	11119421	chr1_11119420_11119421_A	0	-
chr1	11126829	11126830	chr1_11126829_11126830_A	0	-
chr1	11129830	11129831	chr1_11129830_11129831_A	0	-
chr1	11134087	11134088	chr1_11134087_11134088_A	0	-
chr1	11134150	11134151	chr1_11134150_11134151_C	0	-
chr1	11134406	11134407	chr1_11134406_11134407_A	0	-
chr1	11134407	11134408	chr1_11134407_11134408_G	0	-
chr1	11134410	11134411	chr1_11134410_11134411_A	0	-
chr1	11137029	11137030	chr1_11137029_11137030_A	0	-
chr1	11139901	11139902	chr1_11139901_11139902_A	0	-
chr1	11139907	11139908	chr1_11139907_11139908_A	0	-
chr1	11140680	11140681	chr1_11140680_11140681_A	0	-
chr1	11142956	11142957	chr1_11142956_11142957_A	0	-
chr1	11147694	11147695	chr1_11147694_11147695_A	0	-
chr1	11147981	11147982	chr1_11147981_11147982_A	0	-
chr1	11147984	11147985	chr1_11147984_11147985_A	0	-
chr1	11150755	11150756	chr1_11150755_11150756_A	0	-
chr1	11151261	11151262	chr1_11151261_11151262_A	0	-
chr1	11169455	11169456	chr1_11169455_11169456_A	0	-
chr1	11174530	11174531	chr1_11174530_11174531_G	0	-
chr1	11174531	11174532	chr1_11174531_11174532_A	0	-
chr1	11174532	11174533	chr1_11174532_11174533_G	0	-
chr1	11174973	11174974	chr1_11174973_11174974_A	0	-
chr1	11174975	11174976	chr1_11174975_11174976_T	0	-
chr1	11181445	11181446	chr1_11181445_11181446_A	0	-
chr1	11187899	11187900	chr1_11187899_11187900_A	0	-
chr1	11187901	11187902	chr1_11187901_11187902_T	0	-
chr1	11188210	11188211	chr1_11188210_11188211_A	0	-
chr1	11188632	11188633	chr1_11188632_11188633_A	0	-
chr1	11189028	11189029	chr1_11189028_11189029_A	0	-
chr1	11189039	11189040	chr1_11189039_11189040_A	0	-
chr1	11189914	11189915	chr1_11189914_11189915_A	0	-
chr1	11193279	11193280	chr1_11193279_11193280_A	0	-
chr1	11193280	11193281	chr1_11193280_11193281_C	0	-
chr1	11210305	11210306	chr1_11210305_11210306_A	0	-
chr1	11269532	11269533	chr1_11269532_11269533_A	0	-
chr1	11269543	11269544	chr1_11269543_11269544_A	0	-
chr1	11270996	11270997	chr1_11270996_11270997_G	0	-
chr1	11272549	11272550	chr1_11272549_11272550_A	0	-
chr1	11272992	11272993	chr1_11272992_11272993_A	0	-
chr1	11291148	11291149	chr1_11291148_11291149_A	0	-
chr1	11291149	11291150	chr1_11291149_11291150_G	0	-
chr1	11292607	11292608	chr1_11292607_11292608_C	0	-
chr1	11298703	11298704	chr1_11298703_11298704_A	0	-
chr1	11300628	11300629	chr1_11300628_11300629_A	0	-
chr1	11301760	11301761	chr1_11301760_11301761_A	0	-
chr1	11314056	11314057	chr1_11314056_11314057_A	0	-
chr1	11318668	11318669	chr1_11318668_11318669_A	0	-
chr1	11318670	11318671	chr1_11318670_11318671_T	0	-
chr1	11733306	11733307	chr1_11733306_11733307_A	0	+
chr1	11735815	11735816	chr1_11735815_11735816_A	0	-
chr1	11736222	11736223	chr1_11736222_11736223_A	0	-
chr1	11851011	11851012	chr1_11851011_11851012_A	0	-
chr1	11854159	11854160	chr1_11854159_11854160_A	0	-
chr1	11854164	11854165	chr1_11854164_11854165_A	0	-
chr1	11856478	11856479	chr1_11856478_11856479_C	0	-
chr1	11860400	11860401	chr1_11860400_11860401_A	0	-
chr1	11860403	11860404	chr1_11860403_11860404_A	0	-
chr1	11863204	11863205	chr1_11863204_11863205_C	0	-
chr1	11863205	11863206	chr1_11863205_11863206_C	0	-
chr1	11863207	11863208	chr1_11863207_11863208_C	0	-
chr1	11867154	11867155	chr1_11867154_11867155_A	0	+
chr1	11883734	11883735	chr1_11883734_11883735_T	0	+
chr1	11883735	11883736	chr1_11883735_11883736_T	0	+
chr1	11884506	11884507	chr1_11884506_11884507_A	0	+
chr1	11887121	11887122	chr1_11887121_11887122_A	0	+
chr1	11887122	11887123	chr1_11887122_11887123_A	0	+
chr1	11888126	11888127	chr1_11888126_11888127_C	0	+
chr1	11888127	11888128	chr1_11888127_11888128_C	0	+
chr1	11889229	11889230	chr1_11889229_11889230_A	0	+
chr1	11889230	11889231	chr1_11889230_11889231_A	0	+
chr1	11893902	11893903	chr1_11893902_11893903_A	0	+
chr1	11893912	11893913	chr1_11893912_11893913_A	0	+
chr1	11895991	11895992	chr1_11895991_11895992_A	0	+
chr1	11897031	11897032	chr1_11897031_11897032_A	0	+
chr1	11900175	11900176	chr1_11900175_11900176_A	0	+
chr1	11980412	11980413	chr1_11980412_11980413_A	0	-
chr1	11980416	11980417	chr1_11980416_11980417_A	0	-
chr1	12010371	12010372	chr1_12010371_12010372_T	0	+
chr1	12010373	12010374	chr1_12010373_12010374_A	0	+
chr1	12014862	12014863	chr1_12014862_12014863_A	0	+
chr1	12016940	12016941	chr1_12016940_12016941_A	0	+
chr1	12016952	12016953	chr1_12016952_12016953_A	0	+
chr1	12020668	12020669	chr1_12020668_12020669_A	0	+
chr1	12023565	12023566	chr1_12023565_12023566_A	0	+
chr1	12026272	12026273	chr1_12026272_12026273_G	0	+
chr1	12027023	12027024	chr1_12027023_12027024_T	0	+
chr1	12041968	12041969	chr1_12041968_12041969_A	0	+
chr1	12057323	12057324	chr1_12057323_12057324_A	0	+
chr1	12058793	12058794	chr1_12058793_12058794_C	0	+
chr1	12058794	12058795	chr1_12058794_12058795_C	0	+
chr1	12058795	12058796	chr1_12058795_12058796_T	0	+
chr1	12058797	12058798	chr1_12058797_12058798_A	0	+
chr1	12061425	12061426	chr1_12061425_12061426_A	0	+
chr1	12061429	12061430	chr1_12061429_12061430_A	0	+
chr1	12061805	12061806	chr1_12061805_12061806_A	0	+
chr1	12062013	12062014	chr1_12062013_12062014_C	0	+
chr1	12062017	12062018	chr1_12062017_12062018_C	0	+
chr1	12064538	12064539	chr1_12064538_12064539_T	0	+
chr1	12064540	12064541	chr1_12064540_12064541_A	0	+
chr1	12064859	12064860	chr1_12064859_12064860_A	0	+
chr1	12065733	12065734	chr1_12065733_12065734_T	0	+
chr1	12065735	12065736	chr1_12065735_12065736_A	0	+
chr1	12065737	12065738	chr1_12065737_12065738_A	0	+
chr1	12066569	12066570	chr1_12066569_12066570_A	0	+
chr1	12067087	12067088	chr1_12067087_12067088_A	0	+
chr1	12067093	12067094	chr1_12067093_12067094_A	0	+
chr1	12069620	12069621	chr1_12069620_12069621_A	0	+
chr1	12082132	12082133	chr1_12082132_12082133_A	0	+
chr1	12082858	12082859	chr1_12082858_12082859_A	0	+
chr1	12089794	12089795	chr1_12089794_12089795_A	0	+
chr1	12089796	12089797	chr1_12089796_12089797_C	0	+
chr1	12089797	12089798	chr1_12089797_12089798_T	0	+
chr1	12090052	12090053	chr1_12090052_12090053_C	0	+
chr1	12091761	12091762	chr1_12091761_12091762_C	0	+
chr1	12304277	12304278	chr1_12304277_12304278_A	0	+
chr1	12379534	12379535	chr1_12379534_12379535_A	0	+
chr1	12383733	12383734	chr1_12383733_12383734_A	0	+
chr1	12393252	12393253	chr1_12393252_12393253_A	0	+
chr1	12395736	12395737	chr1_12395736_12395737_A	0	+
chr1	12402927	12402928	chr1_12402927_12402928_A	0	+
chr1	12402929	12402930	chr1_12402929_12402930_G	0	+
chr1	12406635	12406636	chr1_12406635_12406636_A	0	+
chr1	12409201	12409202	chr1_12409201_12409202_A	0	+
chr1	12416432	12416433	chr1_12416432_12416433_A	0	+
chr1	12416437	12416438	chr1_12416437_12416438_T	0	+
chr1	12428495	12428496	chr1_12428495_12428496_A	0	+
chr1	12445288	12445289	chr1_12445288_12445289_A	0	+
chr1	12520231	12520232	chr1_12520231_12520232_A	0	+
chr1	12568927	12568928	chr1_12568927_12568928_A	0	+
chr1	12632903	12632904	chr1_12632903_12632904_A	0	-
chr1	12639002	12639003	chr1_12639002_12639003_A	0	-
chr1	12639468	12639469	chr1_12639468_12639469_A	0	-
chr1	13942379	13942380	chr1_13942379_13942380_A	0	+
chr1	14112985	14112986	chr1_14112985_14112986_A	0	+
chr1	15753615	15753616	chr1_15753615_15753616_T	0	+
chr1	15753617	15753618	chr1_15753617_15753618_A	0	+
chr1	15755062	15755063	chr1_15755062_15755063_A	0	+
chr1	15819558	15819559	chr1_15819558_15819559_A	0	-
chr1	15831274	15831275	chr1_15831274_15831275_A	0	-
chr1	15833591	15833592	chr1_15833591_15833592_A	0	-
chr1	15833602	15833603	chr1_15833602_15833603_A	0	-
chr1	15860707	15860708	chr1_15860707_15860708_A	0	+
chr1	15862949	15862950	chr1_15862949_15862950_A	0	+
chr1	15892389	15892390	chr1_15892389_15892390_A	0	+
chr1	15893570	15893571	chr1_15893570_15893571_A	0	+
chr1	15893571	15893572	chr1_15893571_15893572_A	0	+
chr1	15894246	15894247	chr1_15894246_15894247_A	0	+
chr1	15894253	15894254	chr1_15894253_15894254_A	0	+
chr1	15904381	15904382	chr1_15904381_15904382_A	0	-
chr1	15953134	15953135	chr1_15953134_15953135_A	0	+
chr1	15960267	15960268	chr1_15960267_15960268_A	0	+
chr1	15983075	15983076	chr1_15983075_15983076_A	0	+
chr1	15986296	15986297	chr1_15986296_15986297_A	0	+
chr1	16043179	16043180	chr1_16043179_16043180_A	0	+
chr1	16044366	16044367	chr1_16044366_16044367_T	0	+
chr1	16044367	16044368	chr1_16044367_16044368_A	0	+
chr1	16044369	16044370	chr1_16044369_16044370_T	0	+
chr1	16044370	16044371	chr1_16044370_16044371_C	0	+
chr1	16044371	16044372	chr1_16044371_16044372_C	0	+
chr1	16045005	16045006	chr1_16045005_16045006_A	0	+
chr1	16045008	16045009	chr1_16045008_16045009_A	0	+
chr1	16046200	16046201	chr1_16046200_16046201_A	0	+
chr1	16053481	16053482	chr1_16053481_16053482_A	0	+
chr1	16054542	16054543	chr1_16054542_16054543_A	0	+
chr1	16055137	16055138	chr1_16055137_16055138_A	0	+
chr1	16055572	16055573	chr1_16055572_16055573_A	0	+
chr1	16055577	16055578	chr1_16055577_16055578_A	0	+
chr1	16056266	16056267	chr1_16056266_16056267_A	0	+
chr1	16056990	16056991	chr1_16056990_16056991_T	0	+
chr1	16056991	16056992	chr1_16056991_16056992_A	0	+
chr1	16057660	16057661	chr1_16057660_16057661_A	0	+
chr1	16058346	16058347	chr1_16058346_16058347_C	0	+
chr1	16058354	16058355	chr1_16058354_16058355_T	0	+
chr1	16058363	16058364	chr1_16058363_16058364_A	0	+
chr1	16060249	16060250	chr1_16060249_16060250_C	0	+
chr1	16060264	16060265	chr1_16060264_16060265_A	0	+
chr1	16065069	16065070	chr1_16065069_16065070_A	0	+
chr1	16094999	16095000	chr1_16094999_16095000_A	0	+
chr1	16096878	16096879	chr1_16096878_16096879_A	0	+
chr1	16202666	16202667	chr1_16202666_16202667_A	0	+
chr1	16237568	16237569	chr1_16237568_16237569_A	0	+
chr1	16245396	16245397	chr1_16245396_16245397_A	0	+
chr1	16245872	16245873	chr1_16245872_16245873_A	0	+
chr1	16247335	16247336	chr1_16247335_16247336_T	0	+
chr1	16247336	16247337	chr1_16247336_16247337_A	0	+
chr1	16248716	16248717	chr1_16248716_16248717_A	0	+
chr1	16263622	16263623	chr1_16263622_16263623_T	0	+
chr1	16263624	16263625	chr1_16263624_16263625_A	0	+
chr1	16265188	16265189	chr1_16265188_16265189_A	0	+
chr1	16265757	16265758	chr1_16265757_16265758_A	0	+
chr1	16265765	16265766	chr1_16265765_16265766_A	0	+
chr1	16265766	16265767	chr1_16265766_16265767_C	0	+
chr1	16269255	16269256	chr1_16269255_16269256_A	0	-
chr1	16270407	16270408	chr1_16270407_16270408_A	0	-
chr1	16271718	16271719	chr1_16271718_16271719_A	0	-
chr1	16272359	16272360	chr1_16272359_16272360_A	0	-
chr1	16272364	16272365	chr1_16272364_16272365_A	0	-
chr1	16273639	16273640	chr1_16273639_16273640_A	0	-
chr1	16343720	16343721	chr1_16343720_16343721_A	0	-
chr1	16343742	16343743	chr1_16343742_16343743_A	0	-
chr1	16456085	16456086	chr1_16456085_16456086_A	0	-
chr1	16456106	16456107	chr1_16456106_16456107_A	0	-
chr1	16456107	16456108	chr1_16456107_16456108_C	0	-
chr1	16456931	16456932	chr1_16456931_16456932_A	0	-
chr1	16456943	16456944	chr1_16456943_16456944_A	0	-
chr1	16456944	16456945	chr1_16456944_16456945_A	0	-
chr1	16460122	16460123	chr1_16460122_16460123_A	0	-
chr1	16460446	16460447	chr1_16460446_16460447_A	0	-
chr1	16460448	16460449	chr1_16460448_16460449_T	0	-
chr1	16461080	16461081	chr1_16461080_16461081_A	0	-
chr1	16461083	16461084	chr1_16461083_16461084_A	0	-
chr1	16461717	16461718	chr1_16461717_16461718_A	0	-
chr1	16477482	16477483	chr1_16477482_16477483_A	0	-
chr1	16528373	16528374	chr1_16528373_16528374_A	0	-
chr1	16532187	16532188	chr1_16532187_16532188_A	0	-
chr1	16559178	16559179	chr1_16559178_16559179_A	0	-
chr1	16578299	16578300	chr1_16578299_16578300_A	0	-
chr1	16578300	16578301	chr1_16578300_16578301_C	0	-
chr1	16578302	16578303	chr1_16578302_16578303_A	0	-
chr1	16719699	16719700	chr1_16719699_16719700_A	0	+
chr1	16721503	16721504	chr1_16721503_16721504_A	0	+
chr1	16767636	16767637	chr1_16767636_16767637_A	0	+
chr1	16767641	16767642	chr1_16767641_16767642_A	0	+
chr1	16770106	16770107	chr1_16770106_16770107_A	0	+
chr1	16775560	16775561	chr1_16775560_16775561_A	0	+
chr1	16785301	16785302	chr1_16785301_16785302_G	0	+
chr1	16785302	16785303	chr1_16785302_16785303_A	0	+
chr1	16890704	16890705	chr1_16890704_16890705_C	0	-
chr1	16891443	16891444	chr1_16891443_16891444_A	0	-
chr1	16891444	16891445	chr1_16891444_16891445_A	0	-
chr1	16891445	16891446	chr1_16891445_16891446_T	0	-
chr1	16891449	16891450	chr1_16891449_16891450_A	0	-
chr1	16892326	16892327	chr1_16892326_16892327_A	0	-
chr1	16892982	16892983	chr1_16892982_16892983_A	0	-
chr1	16892984	16892985	chr1_16892984_16892985_A	0	-
chr1	16892985	16892986	chr1_16892985_16892986_A	0	-
chr1	16892986	16892987	chr1_16892986_16892987_T	0	-
chr1	16893872	16893873	chr1_16893872_16893873_A	0	-
chr1	16894551	16894552	chr1_16894551_16894552_A	0	-
chr1	16894552	16894553	chr1_16894552_16894553_A	0	-
chr1	16894556	16894557	chr1_16894556_16894557_A	0	-
chr1	16894557	16894558	chr1_16894557_16894558_A	0	-
chr1	16895766	16895767	chr1_16895766_16895767_A	0	-
chr1	16901221	16901222	chr1_16901221_16901222_A	0	-
chr1	16901222	16901223	chr1_16901222_16901223_A	0	-
chr1	16903939	16903940	chr1_16903939_16903940_A	0	-
chr1	16907485	16907486	chr1_16907485_16907486_A	0	-
chr1	16907494	16907495	chr1_16907494_16907495_C	0	-
chr1	16907495	16907496	chr1_16907495_16907496_T	0	-
chr1	16910216	16910217	chr1_16910216_16910217_A	0	-
chr1	16913790	16913791	chr1_16913790_16913791_A	0	-
chr1	16914318	16914319	chr1_16914318_16914319_A	0	-
chr1	16934217	16934218	chr1_16934217_16934218_T	0	-
chr1	16945625	16945626	chr1_16945625_16945626_A	0	-
chr1	16945632	16945633	chr1_16945632_16945633_A	0	-
chr1	16953122	16953123	chr1_16953122_16953123_A	0	-
chr1	16953806	16953807	chr1_16953806_16953807_C	0	-
chr1	16953814	16953815	chr1_16953814_16953815_A	0	-
chr1	16958138	16958139	chr1_16958138_16958139_A	0	-
chr1	16969659	16969660	chr1_16969659_16969660_A	0	-
chr1	17271923	17271924	chr1_17271923_17271924_A	0	+
chr1	17271933	17271934	chr1_17271933_17271934_C	0	+
chr1	17272729	17272730	chr1_17272729_17272730_A	0	+
chr1	17281780	17281781	chr1_17281780_17281781_C	0	+
chr1	17282466	17282467	chr1_17282466_17282467_A	0	+
chr1	17292880	17292881	chr1_17292880_17292881_A	0	+
chr1	17295575	17295576	chr1_17295575_17295576_A	0	+
chr1	17296260	17296261	chr1_17296260_17296261_A	0	+
chr1	17296718	17296719	chr1_17296718_17296719_A	0	+
chr1	17297110	17297111	chr1_17297110_17297111_C	0	+
chr1	17297939	17297940	chr1_17297939_17297940_A	0	+
chr1	17298834	17298835	chr1_17298834_17298835_A	0	+
chr1	17318644	17318645	chr1_17318644_17318645_A	0	-
chr1	17345473	17345474	chr1_17345473_17345474_A	0	-
chr1	17354402	17354403	chr1_17354402_17354403_A	0	-
chr1	17359672	17359673	chr1_17359672_17359673_A	0	-
chr1	17735710	17735711	chr1_17735710_17735711_A	0	-
chr1	17735716	17735717	chr1_17735716_17735717_A	0	-
chr1	17738706	17738707	chr1_17738706_17738707_A	0	-
chr1	17738708	17738709	chr1_17738708_17738709_A	0	-
chr1	17738709	17738710	chr1_17738709_17738710_G	0	-
chr1	17739695	17739696	chr1_17739695_17739696_A	0	-
chr1	17739703	17739704	chr1_17739703_17739704_A	0	-
chr1	17748804	17748805	chr1_17748804_17748805_A	0	-
chr1	17748806	17748807	chr1_17748806_17748807_A	0	-
chr1	17749354	17749355	chr1_17749354_17749355_A	0	-
chr1	17752198	17752199	chr1_17752198_17752199_A	0	-
chr1	17752204	17752205	chr1_17752204_17752205_A	0	-
chr1	17964950	17964951	chr1_17964950_17964951_C	0	+
chr1	17964964	17964965	chr1_17964964_17964965_C	0	+
chr1	17965031	17965032	chr1_17965031_17965032_A	0	+
chr1	17965036	17965037	chr1_17965036_17965037_A	0	+
chr1	17966666	17966667	chr1_17966666_17966667_A	0	+
chr1	19201094	19201095	chr1_19201094_19201095_A	0	-
chr1	19201096	19201097	chr1_19201096_19201097_T	0	-
chr1	19201099	19201100	chr1_19201099_19201100_C	0	-
chr1	19201100	19201101	chr1_19201100_19201101_T	0	-
chr1	19202017	19202018	chr1_19202017_19202018_A	0	-
chr1	19403429	19403430	chr1_19403429_19403430_A	0	-
chr1	19408087	19408088	chr1_19408087_19408088_A	0	-
chr1	19411215	19411216	chr1_19411215_19411216_A	0	-
chr1	19411220	19411221	chr1_19411220_19411221_A	0	-
chr1	19412798	19412799	chr1_19412798_19412799_A	0	-
chr1	19413359	19413360	chr1_19413359_19413360_A	0	-
chr1	19414447	19414448	chr1_19414447_19414448_A	0	-
chr1	19419434	19419435	chr1_19419434_19419435_A	0	-
chr1	19420009	19420010	chr1_19420009_19420010_A	0	-
chr1	19420651	19420652	chr1_19420651_19420652_A	0	-
chr1	19420657	19420658	chr1_19420657_19420658_A	0	-
chr1	19420662	19420663	chr1_19420662_19420663_A	0	-
chr1	19420666	19420667	chr1_19420666_19420667_A	0	-
chr1	19421540	19421541	chr1_19421540_19421541_A	0	-
chr1	19422163	19422164	chr1_19422163_19422164_A	0	-
chr1	19423179	19423180	chr1_19423179_19423180_A	0	-
chr1	19423183	19423184	chr1_19423183_19423184_C	0	-
chr1	19423184	19423185	chr1_19423184_19423185_A	0	-
chr1	19426188	19426189	chr1_19426188_19426189_A	0	-
chr1	19426194	19426195	chr1_19426194_19426195_A	0	-
chr1	19427091	19427092	chr1_19427091_19427092_A	0	-
chr1	19428159	19428160	chr1_19428159_19428160_A	0	-
chr1	19430776	19430777	chr1_19430776_19430777_A	0	-
chr1	19431182	19431183	chr1_19431182_19431183_A	0	-
chr1	19439391	19439392	chr1_19439391_19439392_A	0	-
chr1	19439393	19439394	chr1_19439393_19439394_T	0	-
chr1	19441465	19441466	chr1_19441465_19441466_A	0	-
chr1	19441467	19441468	chr1_19441467_19441468_T	0	-
chr1	19443937	19443938	chr1_19443937_19443938_A	0	-
chr1	19443939	19443940	chr1_19443939_19443940_T	0	-
chr1	19444422	19444423	chr1_19444422_19444423_A	0	-
chr1	19444428	19444429	chr1_19444428_19444429_A	0	-
chr1	19445467	19445468	chr1_19445467_19445468_A	0	-
chr1	19445479	19445480	chr1_19445479_19445480_A	0	-
chr1	19445480	19445481	chr1_19445480_19445481_A	0	-
chr1	19446218	19446219	chr1_19446218_19446219_A	0	-
chr1	19446219	19446220	chr1_19446219_19446220_A	0	-
chr1	19446862	19446863	chr1_19446862_19446863_A	0	-
chr1	19448532	19448533	chr1_19448532_19448533_C	0	-
chr1	19448533	19448534	chr1_19448533_19448534_C	0	-
chr1	19448536	19448537	chr1_19448536_19448537_A	0	-
chr1	19449584	19449585	chr1_19449584_19449585_A	0	-
chr1	19451204	19451205	chr1_19451204_19451205_A	0	-
chr1	19451214	19451215	chr1_19451214_19451215_A	0	-
chr1	19453174	19453175	chr1_19453174_19453175_A	0	-
chr1	19453177	19453178	chr1_19453177_19453178_C	0	-
chr1	19453187	19453188	chr1_19453187_19453188_A	0	-
chr1	19453190	19453191	chr1_19453190_19453191_A	0	-
chr1	19454252	19454253	chr1_19454252_19454253_A	0	-
chr1	19454264	19454265	chr1_19454264_19454265_A	0	-
chr1	19454267	19454268	chr1_19454267_19454268_A	0	-
chr1	19454268	19454269	chr1_19454268_19454269_A	0	-
chr1	19454816	19454817	chr1_19454816_19454817_T	0	-
chr1	19454835	19454836	chr1_19454835_19454836_G	0	-
chr1	19454840	19454841	chr1_19454840_19454841_G	0	-
chr1	19454847	19454848	chr1_19454847_19454848_A	0	-
chr1	19464704	19464705	chr1_19464704_19464705_A	0	-
chr1	19467405	19467406	chr1_19467405_19467406_A	0	-
chr1	19468290	19468291	chr1_19468290_19468291_C	0	-
chr1	19470606	19470607	chr1_19470606_19470607_A	0	-
chr1	19471432	19471433	chr1_19471432_19471433_A	0	-
chr1	19472449	19472450	chr1_19472449_19472450_A	0	-
chr1	19474642	19474643	chr1_19474642_19474643_A	0	-
chr1	19474643	19474644	chr1_19474643_19474644_A	0	-
chr1	19478375	19478376	chr1_19478375_19478376_A	0	-
chr1	19480015	19480016	chr1_19480015_19480016_C	0	-
chr1	19481592	19481593	chr1_19481592_19481593_A	0	-
chr1	19481597	19481598	chr1_19481597_19481598_A	0	-
chr1	19481604	19481605	chr1_19481604_19481605_A	0	-
chr1	19482186	19482187	chr1_19482186_19482187_A	0	-
chr1	19482944	19482945	chr1_19482944_19482945_A	0	-
chr1	19483433	19483434	chr1_19483433_19483434_A	0	-
chr1	19483437	19483438	chr1_19483437_19483438_A	0	-
chr1	19483445	19483446	chr1_19483445_19483446_A	0	-
chr1	19484519	19484520	chr1_19484519_19484520_C	0	-
chr1	19484520	19484521	chr1_19484520_19484521_G	0	-
chr1	19484521	19484522	chr1_19484521_19484522_T	0	-
chr1	19486794	19486795	chr1_19486794_19486795_A	0	-
chr1	19486802	19486803	chr1_19486802_19486803_A	0	-
chr1	19487667	19487668	chr1_19487667_19487668_A	0	-
chr1	19487668	19487669	chr1_19487668_19487669_T	0	-
chr1	19488412	19488413	chr1_19488412_19488413_A	0	-
chr1	19488413	19488414	chr1_19488413_19488414_A	0	-
chr1	19490363	19490364	chr1_19490363_19490364_A	0	-
chr1	19490957	19490958	chr1_19490957_19490958_A	0	-
chr1	19490961	19490962	chr1_19490961_19490962_A	0	-
chr1	19491516	19491517	chr1_19491516_19491517_A	0	-
chr1	19491517	19491518	chr1_19491517_19491518_G	0	-
chr1	19491518	19491519	chr1_19491518_19491519_T	0	-
chr1	19491876	19491877	chr1_19491876_19491877_A	0	-
chr1	19492271	19492272	chr1_19492271_19492272_A	0	-
chr1	19494700	19494701	chr1_19494700_19494701_A	0	-
chr1	19494738	19494739	chr1_19494738_19494739_T	0	-
chr1	19496055	19496056	chr1_19496055_19496056_A	0	-
chr1	19497408	19497409	chr1_19497408_19497409_A	0	-
chr1	19501546	19501547	chr1_19501546_19501547_A	0	-
chr1	19501547	19501548	chr1_19501547_19501548_A	0	-
chr1	19501581	19501582	chr1_19501581_19501582_A	0	-
chr1	19503244	19503245	chr1_19503244_19503245_A	0	-
chr1	19503245	19503246	chr1_19503245_19503246_A	0	-
chr1	19504254	19504255	chr1_19504254_19504255_A	0	-
chr1	19504258	19504259	chr1_19504258_19504259_A	0	-
chr1	19510694	19510695	chr1_19510694_19510695_A	0	-
chr1	19511809	19511810	chr1_19511809_19511810_A	0	-
chr1	19513183	19513184	chr1_19513183_19513184_A	0	-
chr1	19524565	19524566	chr1_19524565_19524566_A	0	-
chr1	19525190	19525191	chr1_19525190_19525191_G	0	-
chr1	19525203	19525204	chr1_19525203_19525204_A	0	-
chr1	19525472	19525473	chr1_19525472_19525473_A	0	-
chr1	19528332	19528333	chr1_19528332_19528333_G	0	-
chr1	19546221	19546222	chr1_19546221_19546222_A	0	-
chr1	19549396	19549397	chr1_19549396_19549397_T	0	-
chr1	19557933	19557934	chr1_19557933_19557934_A	0	-
chr1	19561770	19561771	chr1_19561770_19561771_A	0	-
chr1	19563745	19563746	chr1_19563745_19563746_A	0	-
chr1	19564655	19564656	chr1_19564655_19564656_A	0	-
chr1	19565380	19565381	chr1_19565380_19565381_A	0	-
chr1	19565382	19565383	chr1_19565382_19565383_T	0	-
chr1	19565815	19565816	chr1_19565815_19565816_A	0	-
chr1	19565817	19565818	chr1_19565817_19565818_T	0	-
chr1	19565820	19565821	chr1_19565820_19565821_A	0	-
chr1	19566957	19566958	chr1_19566957_19566958_A	0	-
chr1	19566958	19566959	chr1_19566958_19566959_A	0	-
chr1	19570222	19570223	chr1_19570222_19570223_A	0	-
chr1	19570532	19570533	chr1_19570532_19570533_A	0	-
chr1	19582417	19582418	chr1_19582417_19582418_A	0	+
chr1	19583918	19583919	chr1_19583918_19583919_A	0	+
chr1	19584299	19584300	chr1_19584299_19584300_C	0	+
chr1	19584305	19584306	chr1_19584305_19584306_A	0	+
chr1	19584306	19584307	chr1_19584306_19584307_C	0	+
chr1	19584944	19584945	chr1_19584944_19584945_T	0	+
chr1	19632671	19632672	chr1_19632671_19632672_T	0	-
chr1	19633612	19633613	chr1_19633612_19633613_A	0	-
chr1	19633614	19633615	chr1_19633614_19633615_T	0	-
chr1	19633941	19633942	chr1_19633941_19633942_A	0	-
chr1	19634776	19634777	chr1_19634776_19634777_A	0	-
chr1	19653982	19653983	chr1_19653982_19653983_A	0	+
chr1	19670944	19670945	chr1_19670944_19670945_A	0	-
chr1	19670946	19670947	chr1_19670946_19670947_T	0	-
chr1	19683270	19683271	chr1_19683270_19683271_A	0	-
chr1	19924302	19924303	chr1_19924302_19924303_A	0	+
chr1	20216855	20216856	chr1_20216855_20216856_A	0	+
chr1	20224003	20224004	chr1_20224003_20224004_A	0	+
chr1	20232902	20232903	chr1_20232902_20232903_A	0	+
chr1	20827930	20827931	chr1_20827930_20827931_A	0	-
chr1	20827936	20827937	chr1_20827936_20827937_A	0	-
chr1	20828700	20828701	chr1_20828700_20828701_A	0	-
chr1	20828703	20828704	chr1_20828703_20828704_A	0	-
chr1	20974970	20974971	chr1_20974970_20974971_A	0	+
chr1	20975461	20975462	chr1_20975461_20975462_A	0	+
chr1	20979040	20979041	chr1_20979040_20979041_C	0	-
chr1	20979042	20979043	chr1_20979042_20979043_T	0	-
chr1	20980292	20980293	chr1_20980292_20980293_A	0	-
chr1	21053586	21053587	chr1_21053586_21053587_A	0	-
chr1	21072169	21072170	chr1_21072169_21072170_A	0	-
chr1	21076397	21076398	chr1_21076397_21076398_T	0	-
chr1	21083779	21083780	chr1_21083779_21083780_A	0	-
chr1	21094179	21094180	chr1_21094179_21094180_T	0	-
chr1	21097590	21097591	chr1_21097590_21097591_A	0	-
chr1	21102521	21102522	chr1_21102521_21102522_A	0	-
chr1	21102522	21102523	chr1_21102522_21102523_A	0	-
chr1	21102528	21102529	chr1_21102528_21102529_A	0	-
chr1	21102529	21102530	chr1_21102529_21102530_A	0	-
chr1	21103270	21103271	chr1_21103270_21103271_A	0	-
chr1	21103271	21103272	chr1_21103271_21103272_T	0	-
chr1	21103278	21103279	chr1_21103278_21103279_A	0	-
chr1	21106422	21106423	chr1_21106422_21106423_T	0	-
chr1	21106423	21106424	chr1_21106423_21106424_A	0	-
chr1	21107057	21107058	chr1_21107057_21107058_A	0	-
chr1	21139758	21139759	chr1_21139758_21139759_A	0	-
chr1	21176064	21176065	chr1_21176064_21176065_A	0	-
chr1	21176065	21176066	chr1_21176065_21176066_A	0	-
chr1	21176070	21176071	chr1_21176070_21176071_A	0	-
chr1	21184009	21184010	chr1_21184009_21184010_C	0	-
chr1	21184010	21184011	chr1_21184010_21184011_C	0	-
chr1	21191239	21191240	chr1_21191239_21191240_T	0	-
chr1	21191240	21191241	chr1_21191240_21191241_A	0	-
chr1	21306968	21306969	chr1_21306968_21306969_A	0	-
chr1	21502876	21502877	chr1_21502876_21502877_A	0	-
chr1	21546654	21546655	chr1_21546654_21546655_A	0	-
chr1	21548358	21548359	chr1_21548358_21548359_A	0	-
chr1	21551956	21551957	chr1_21551956_21551957_A	0	-
chr1	21551958	21551959	chr1_21551958_21551959_A	0	-
chr1	21553740	21553741	chr1_21553740_21553741_A	0	-
chr1	21553746	21553747	chr1_21553746_21553747_A	0	-
chr1	21553752	21553753	chr1_21553752_21553753_A	0	-
chr1	21553754	21553755	chr1_21553754_21553755_A	0	-
chr1	21554557	21554558	chr1_21554557_21554558_C	0	-
chr1	21560178	21560179	chr1_21560178_21560179_A	0	-
chr1	21562443	21562444	chr1_21562443_21562444_A	0	-
chr1	21571622	21571623	chr1_21571622_21571623_A	0	-
chr1	21573877	21573878	chr1_21573877_21573878_A	0	-
chr1	21582655	21582656	chr1_21582655_21582656_A	0	-
chr1	21584102	21584103	chr1_21584102_21584103_A	0	-
chr1	21794912	21794913	chr1_21794912_21794913_A	0	+
chr1	21799836	21799837	chr1_21799836_21799837_A	0	+
chr1	21928319	21928320	chr1_21928319_21928320_A	0	-
chr1	21928320	21928321	chr1_21928320_21928321_A	0	-
chr1	21935468	21935469	chr1_21935468_21935469_A	0	-
chr1	21940221	21940222	chr1_21940221_21940222_A	0	-
chr1	21944001	21944002	chr1_21944001_21944002_A	0	-
chr1	22005959	22005960	chr1_22005959_22005960_A	0	-
chr1	22013768	22013769	chr1_22013768_22013769_C	0	-
chr1	22030148	22030149	chr1_22030148_22030149_A	0	-
chr1	22032366	22032367	chr1_22032366_22032367_A	0	-
chr1	22032367	22032368	chr1_22032367_22032368_A	0	-
chr1	22032711	22032712	chr1_22032711_22032712_A	0	-
chr1	22032712	22032713	chr1_22032712_22032713_G	0	-
chr1	22047678	22047679	chr1_22047678_22047679_A	0	-
chr1	22047686	22047687	chr1_22047686_22047687_A	0	-
chr1	22048294	22048295	chr1_22048294_22048295_A	0	-
chr1	22079641	22079642	chr1_22079641_22079642_A	0	-
chr1	22151293	22151294	chr1_22151293_22151294_A	0	-
chr1	22151311	22151312	chr1_22151311_22151312_T	0	-
chr1	22154668	22154669	chr1_22154668_22154669_A	0	-
chr1	22154941	22154942	chr1_22154941_22154942_C	0	-
chr1	22154942	22154943	chr1_22154942_22154943_C	0	-
chr1	22155594	22155595	chr1_22155594_22155595_A	0	-
chr1	22155595	22155596	chr1_22155595_22155596_A	0	-
chr1	22155598	22155599	chr1_22155598_22155599_C	0	-
chr1	22155603	22155604	chr1_22155603_22155604_A	0	-
chr1	22158337	22158338	chr1_22158337_22158338_A	0	-
chr1	22160446	22160447	chr1_22160446_22160447_A	0	-
chr1	22160504	22160505	chr1_22160504_22160505_T	0	-
chr1	22161460	22161461	chr1_22161460_22161461_A	0	-
chr1	22161464	22161465	chr1_22161464_22161465_C	0	-
chr1	22161465	22161466	chr1_22161465_22161466_A	0	-
chr1	22163514	22163515	chr1_22163514_22163515_A	0	-
chr1	22163522	22163523	chr1_22163522_22163523_A	0	-
chr1	22163524	22163525	chr1_22163524_22163525_G	0	-
chr1	22166058	22166059	chr1_22166058_22166059_C	0	-
chr1	22166072	22166073	chr1_22166072_22166073_A	0	-
chr1	22166076	22166077	chr1_22166076_22166077_A	0	-
chr1	22167791	22167792	chr1_22167791_22167792_A	0	-
chr1	22168896	22168897	chr1_22168896_22168897_A	0	-
chr1	22168899	22168900	chr1_22168899_22168900_A	0	-
chr1	22169430	22169431	chr1_22169430_22169431_A	0	-
chr1	22169431	22169432	chr1_22169431_22169432_C	0	-
chr1	22169434	22169435	chr1_22169434_22169435_A	0	-
chr1	22169435	22169436	chr1_22169435_22169436_C	0	-
chr1	22169440	22169441	chr1_22169440_22169441_T	0	-
chr1	22169961	22169962	chr1_22169961_22169962_A	0	-
chr1	22170815	22170816	chr1_22170815_22170816_A	0	-
chr1	22173111	22173112	chr1_22173111_22173112_A	0	-
chr1	22174018	22174019	chr1_22174018_22174019_C	0	-
chr1	22174021	22174022	chr1_22174021_22174022_A	0	-
chr1	22174023	22174024	chr1_22174023_22174024_C	0	-
chr1	22174024	22174025	chr1_22174024_22174025_T	0	-
chr1	22174037	22174038	chr1_22174037_22174038_A	0	-
chr1	22174604	22174605	chr1_22174604_22174605_T	0	-
chr1	22174607	22174608	chr1_22174607_22174608_T	0	-
chr1	22174610	22174611	chr1_22174610_22174611_A	0	-
chr1	22174614	22174615	chr1_22174614_22174615_C	0	-
chr1	22174616	22174617	chr1_22174616_22174617_T	0	-
chr1	22175553	22175554	chr1_22175553_22175554_A	0	-
chr1	22175554	22175555	chr1_22175554_22175555_G	0	-
chr1	22177011	22177012	chr1_22177011_22177012_A	0	-
chr1	22178213	22178214	chr1_22178213_22178214_A	0	-
chr1	22178753	22178754	chr1_22178753_22178754_A	0	-
chr1	22179583	22179584	chr1_22179583_22179584_G	0	-
chr1	22179639	22179640	chr1_22179639_22179640_A	0	-
chr1	22180862	22180863	chr1_22180862_22180863_A	0	-
chr1	22181495	22181496	chr1_22181495_22181496_A	0	-
chr1	22181500	22181501	chr1_22181500_22181501_A	0	-
chr1	22182433	22182434	chr1_22182433_22182434_A	0	-
chr1	22186198	22186199	chr1_22186198_22186199_A	0	-
chr1	22186509	22186510	chr1_22186509_22186510_G	0	-
chr1	22188641	22188642	chr1_22188641_22188642_A	0	-
chr1	22191604	22191605	chr1_22191604_22191605_A	0	-
chr1	22191878	22191879	chr1_22191878_22191879_A	0	-
chr1	22191879	22191880	chr1_22191879_22191880_A	0	-
chr1	22199272	22199273	chr1_22199272_22199273_C	0	-
chr1	22199275	22199276	chr1_22199275_22199276_C	0	-
chr1	22199288	22199289	chr1_22199288_22199289_A	0	-
chr1	22200528	22200529	chr1_22200528_22200529_A	0	-
chr1	22200529	22200530	chr1_22200529_22200530_G	0	-
chr1	22201517	22201518	chr1_22201517_22201518_A	0	-
chr1	22202555	22202556	chr1_22202555_22202556_C	0	-
chr1	22203166	22203167	chr1_22203166_22203167_A	0	-
chr1	22205181	22205182	chr1_22205181_22205182_A	0	-
chr1	22206770	22206771	chr1_22206770_22206771_A	0	-
chr1	22206774	22206775	chr1_22206774_22206775_A	0	-
chr1	22208017	22208018	chr1_22208017_22208018_A	0	-
chr1	22211667	22211668	chr1_22211667_22211668_C	0	-
chr1	22211668	22211669	chr1_22211668_22211669_C	0	-
chr1	22211671	22211672	chr1_22211671_22211672_A	0	-
chr1	22211965	22211966	chr1_22211965_22211966_A	0	-
chr1	22214587	22214588	chr1_22214587_22214588_A	0	-
chr1	22216664	22216665	chr1_22216664_22216665_A	0	-
chr1	22413129	22413130	chr1_22413129_22413130_A	0	+
chr1	22417895	22417896	chr1_22417895_22417896_A	0	+
chr1	22828751	22828752	chr1_22828751_22828752_A	0	+
chr1	22834459	22834460	chr1_22834459_22834460_A	0	+
chr1	22834466	22834467	chr1_22834466_22834467_A	0	+
chr1	22834994	22834995	chr1_22834994_22834995_A	0	+
chr1	22839370	22839371	chr1_22839370_22839371_G	0	+
chr1	22839380	22839381	chr1_22839380_22839381_A	0	+
chr1	22839387	22839388	chr1_22839387_22839388_C	0	+
chr1	22839389	22839390	chr1_22839389_22839390_G	0	+
chr1	22839390	22839391	chr1_22839390_22839391_G	0	+
chr1	22846494	22846495	chr1_22846494_22846495_C	0	+
chr1	22847966	22847967	chr1_22847966_22847967_A	0	+
chr1	22852651	22852652	chr1_22852651_22852652_T	0	+
chr1	22852670	22852671	chr1_22852670_22852671_A	0	+
chr1	23395537	23395538	chr1_23395537_23395538_A	0	+
chr1	23397694	23397695	chr1_23397694_23397695_A	0	+
chr1	23397695	23397696	chr1_23397695_23397696_A	0	+
chr1	23398590	23398591	chr1_23398590_23398591_A	0	+
chr1	23398594	23398595	chr1_23398594_23398595_A	0	+
chr1	23399756	23399757	chr1_23399756_23399757_A	0	+
chr1	23399757	23399758	chr1_23399757_23399758_A	0	+
chr1	23405450	23405451	chr1_23405450_23405451_A	0	+
chr1	23406015	23406016	chr1_23406015_23406016_A	0	+
chr1	23406020	23406021	chr1_23406020_23406021_C	0	+
chr1	23406023	23406024	chr1_23406023_23406024_A	0	+
chr1	23408683	23408684	chr1_23408683_23408684_A	0	+
chr1	23408686	23408687	chr1_23408686_23408687_A	0	+
chr1	23409637	23409638	chr1_23409637_23409638_A	0	+
chr1	23409646	23409647	chr1_23409646_23409647_A	0	+
chr1	23415568	23415569	chr1_23415568_23415569_A	0	-
chr1	23637839	23637840	chr1_23637839_23637840_A	0	-
chr1	23640225	23640226	chr1_23640225_23640226_A	0	-
chr1	23645205	23645206	chr1_23645205_23645206_A	0	-
chr1	23645212	23645213	chr1_23645212_23645213_T	0	-
chr1	23645213	23645214	chr1_23645213_23645214_T	0	-
chr1	23664385	23664386	chr1_23664385_23664386_A	0	-
chr1	23664386	23664387	chr1_23664386_23664387_G	0	-
chr1	23667534	23667535	chr1_23667534_23667535_A	0	-
chr1	23697610	23697611	chr1_23697610_23697611_G	0	+
chr1	23707993	23707994	chr1_23707993_23707994_A	0	-
chr1	23757642	23757643	chr1_23757642_23757643_A	0	-
chr1	23762544	23762545	chr1_23762544_23762545_A	0	-
chr1	23768269	23768270	chr1_23768269_23768270_A	0	-
chr1	23768276	23768277	chr1_23768276_23768277_A	0	-
chr1	23779283	23779284	chr1_23779283_23779284_A	0	-
chr1	23847592	23847593	chr1_23847592_23847593_A	0	-
chr1	23851012	23851013	chr1_23851012_23851013_A	0	-
chr1	23884941	23884942	chr1_23884941_23884942_T	0	-
chr1	24019075	24019076	chr1_24019075_24019076_A	0	+
chr1	24020271	24020272	chr1_24020271_24020272_A	0	+
chr1	24021115	24021116	chr1_24021115_24021116_A	0	+
chr1	24021117	24021118	chr1_24021117_24021118_A	0	+
chr1	24021127	24021128	chr1_24021127_24021128_A	0	+
chr1	24022262	24022263	chr1_24022262_24022263_T	0	+
chr1	24022264	24022265	chr1_24022264_24022265_A	0	+
chr1	24022805	24022806	chr1_24022805_24022806_T	0	+
chr1	24076308	24076309	chr1_24076308_24076309_A	0	+
chr1	24077306	24077307	chr1_24077306_24077307_A	0	+
chr1	24078858	24078859	chr1_24078858_24078859_A	0	+
chr1	24078862	24078863	chr1_24078862_24078863_A	0	+
chr1	24082745	24082746	chr1_24082745_24082746_A	0	+
chr1	24083249	24083250	chr1_24083249_24083250_A	0	+
chr1	24083418	24083419	chr1_24083418_24083419_A	0	+
chr1	24083419	24083420	chr1_24083419_24083420_A	0	+
chr1	24085974	24085975	chr1_24085974_24085975_A	0	+
chr1	24098402	24098403	chr1_24098402_24098403_A	0	-
chr1	24112139	24112140	chr1_24112139_24112140_A	0	+
chr1	24112761	24112762	chr1_24112761_24112762_A	0	+
chr1	24112771	24112772	chr1_24112771_24112772_A	0	+
chr1	24112773	24112774	chr1_24112773_24112774_A	0	+
chr1	24120164	24120165	chr1_24120164_24120165_A	0	+
chr1	24124381	24124382	chr1_24124381_24124382_A	0	-
chr1	24125522	24125523	chr1_24125522_24125523_A	0	-
chr1	24134834	24134835	chr1_24134834_24134835_A	0	-
chr1	24143287	24143288	chr1_24143287_24143288_A	0	-
chr1	24287890	24287891	chr1_24287890_24287891_A	0	+
chr1	24298141	24298142	chr1_24298141_24298142_A	0	-
chr1	24298537	24298538	chr1_24298537_24298538_A	0	-
chr1	24304789	24304790	chr1_24304789_24304790_A	0	-
chr1	24305328	24305329	chr1_24305328_24305329_A	0	-
chr1	24685136	24685137	chr1_24685136_24685137_A	0	-
chr1	24768514	24768515	chr1_24768514_24768515_A	0	+
chr1	24779871	24779872	chr1_24779871_24779872_A	0	+
chr1	24973131	24973132	chr1_24973131_24973132_A	0	+
chr1	24973135	24973136	chr1_24973135_24973136_A	0	+
chr1	24973533	24973534	chr1_24973533_24973534_A	0	+
chr1	24973541	24973542	chr1_24973541_24973542_A	0	+
chr1	24973542	24973543	chr1_24973542_24973543_A	0	+
chr1	24975316	24975317	chr1_24975316_24975317_A	0	+
chr1	24976427	24976428	chr1_24976427_24976428_A	0	+
chr1	24977886	24977887	chr1_24977886_24977887_A	0	+
chr1	24979372	24979373	chr1_24979372_24979373_A	0	+
chr1	24979376	24979377	chr1_24979376_24979377_A	0	+
chr1	24979379	24979380	chr1_24979379_24979380_A	0	+
chr1	24979380	24979381	chr1_24979380_24979381_C	0	+
chr1	24979384	24979385	chr1_24979384_24979385_A	0	+
chr1	24987175	24987176	chr1_24987175_24987176_A	0	+
chr1	24989124	24989125	chr1_24989124_24989125_A	0	+
chr1	24989646	24989647	chr1_24989646_24989647_A	0	+
chr1	24995587	24995588	chr1_24995587_24995588_A	0	+
chr1	24995592	24995593	chr1_24995592_24995593_A	0	+
chr1	24996580	24996581	chr1_24996580_24996581_A	0	+
chr1	24996588	24996589	chr1_24996588_24996589_A	0	+
chr1	24997844	24997845	chr1_24997844_24997845_A	0	+
chr1	24997845	24997846	chr1_24997845_24997846_A	0	+
chr1	24998647	24998648	chr1_24998647_24998648_A	0	+
chr1	25549949	25549950	chr1_25549949_25549950_A	0	-
chr1	25554043	25554044	chr1_25554043_25554044_A	0	-
chr1	25554045	25554046	chr1_25554045_25554046_T	0	-
chr1	25554745	25554746	chr1_25554745_25554746_A	0	-
chr1	25554757	25554758	chr1_25554757_25554758_A	0	-
chr1	25570152	25570153	chr1_25570152_25570153_A	0	-
chr1	25570735	25570736	chr1_25570735_25570736_A	0	-
chr1	25570737	25570738	chr1_25570737_25570738_A	0	-
chr1	25571012	25571013	chr1_25571012_25571013_A	0	-
chr1	25571019	25571020	chr1_25571019_25571020_A	0	-
chr1	25571022	25571023	chr1_25571022_25571023_A	0	-
chr1	25571815	25571816	chr1_25571815_25571816_A	0	-
chr1	25784831	25784832	chr1_25784831_25784832_A	0	+
chr1	25812085	25812086	chr1_25812085_25812086_A	0	+
chr1	25817872	25817873	chr1_25817872_25817873_A	0	+
chr1	25817875	25817876	chr1_25817875_25817876_A	0	+
chr1	25881330	25881331	chr1_25881330_25881331_G	0	+
chr1	25881331	25881332	chr1_25881331_25881332_A	0	+
chr1	26128481	26128482	chr1_26128481_26128482_A	0	+
chr1	26131612	26131613	chr1_26131612_26131613_C	0	+
chr1	26136152	26136153	chr1_26136152_26136153_A	0	+
chr1	26137912	26137913	chr1_26137912_26137913_A	0	+
chr1	26137915	26137916	chr1_26137915_26137916_A	0	+
chr1	26137919	26137920	chr1_26137919_26137920_T	0	+
chr1	26137923	26137924	chr1_26137923_26137924_A	0	+
chr1	26140335	26140336	chr1_26140335_26140336_T	0	+
chr1	26140349	26140350	chr1_26140349_26140350_A	0	+
chr1	26153065	26153066	chr1_26153065_26153066_T	0	+
chr1	26153080	26153081	chr1_26153080_26153081_A	0	+
chr1	26155971	26155972	chr1_26155971_26155972_C	0	+
chr1	26162362	26162363	chr1_26162362_26162363_A	0	-
chr1	26230321	26230322	chr1_26230321_26230322_A	0	-
chr1	26230327	26230328	chr1_26230327_26230328_A	0	-
chr1	26230328	26230329	chr1_26230328_26230329_G	0	-
chr1	26231251	26231252	chr1_26231251_26231252_A	0	-
chr1	26383847	26383848	chr1_26383847_26383848_A	0	-
chr1	26385132	26385133	chr1_26385132_26385133_A	0	-
chr1	26496880	26496881	chr1_26496880_26496881_A	0	+
chr1	26511475	26511476	chr1_26511475_26511476_A	0	+
chr1	26515749	26515750	chr1_26515749_26515750_A	0	+
chr1	26584064	26584065	chr1_26584064_26584065_A	0	+
chr1	26584618	26584619	chr1_26584618_26584619_T	0	+
chr1	26597484	26597485	chr1_26597484_26597485_A	0	+
chr1	26598478	26598479	chr1_26598478_26598479_C	0	+
chr1	26598479	26598480	chr1_26598479_26598480_T	0	+
chr1	26598489	26598490	chr1_26598489_26598490_C	0	+
chr1	26598492	26598493	chr1_26598492_26598493_T	0	+
chr1	26598494	26598495	chr1_26598494_26598495_A	0	+
chr1	26601432	26601433	chr1_26601432_26601433_A	0	+
chr1	26603593	26603594	chr1_26603593_26603594_A	0	+
chr1	26603594	26603595	chr1_26603594_26603595_A	0	+
chr1	26610997	26610998	chr1_26610997_26610998_C	0	-
chr1	26610998	26610999	chr1_26610998_26610999_C	0	-
chr1	26610999	26611000	chr1_26610999_26611000_G	0	-
chr1	26611000	26611001	chr1_26611000_26611001_T	0	-
chr1	26611001	26611002	chr1_26611001_26611002_C	0	-
chr1	26611002	26611003	chr1_26611002_26611003_G	0	-
chr1	26611003	26611004	chr1_26611003_26611004_C	0	-
chr1	26611015	26611016	chr1_26611015_26611016_A	0	-
chr1	26611076	26611077	chr1_26611076_26611077_A	0	-
chr1	26612052	26612053	chr1_26612052_26612053_A	0	-
chr1	26623510	26623511	chr1_26623510_26623511_A	0	-
chr1	26623516	26623517	chr1_26623516_26623517_A	0	-
chr1	26764634	26764635	chr1_26764634_26764635_A	0	+
chr1	26784239	26784240	chr1_26784239_26784240_A	0	+
chr1	26799948	26799949	chr1_26799948_26799949_A	0	+
chr1	26800155	26800156	chr1_26800155_26800156_A	0	+
chr1	26800164	26800165	chr1_26800164_26800165_A	0	+
chr1	26800538	26800539	chr1_26800538_26800539_T	0	+
chr1	26800540	26800541	chr1_26800540_26800541_A	0	+
chr1	26800546	26800547	chr1_26800546_26800547_A	0	+
chr1	26801033	26801034	chr1_26801033_26801034_A	0	+
chr1	26801037	26801038	chr1_26801037_26801038_A	0	+
chr1	26801043	26801044	chr1_26801043_26801044_A	0	+
chr1	26801570	26801571	chr1_26801570_26801571_A	0	+
chr1	26801572	26801573	chr1_26801572_26801573_G	0	+
chr1	26801579	26801580	chr1_26801579_26801580_A	0	+
chr1	26873634	26873635	chr1_26873634_26873635_A	0	+
chr1	26873653	26873654	chr1_26873653_26873654_C	0	+
chr1	26873661	26873662	chr1_26873661_26873662_C	0	+
chr1	26879858	26879859	chr1_26879858_26879859_A	0	+
chr1	26880673	26880674	chr1_26880673_26880674_A	0	+
chr1	26880683	26880684	chr1_26880683_26880684_A	0	+
chr1	26881056	26881057	chr1_26881056_26881057_A	0	+
chr1	26882004	26882005	chr1_26882004_26882005_A	0	+
chr1	26883461	26883462	chr1_26883461_26883462_G	0	+
chr1	26883462	26883463	chr1_26883462_26883463_A	0	+
chr1	26885274	26885275	chr1_26885274_26885275_A	0	+
chr1	26887512	26887513	chr1_26887512_26887513_C	0	+
chr1	26898314	26898315	chr1_26898314_26898315_A	0	+
chr1	26898644	26898645	chr1_26898644_26898645_G	0	+
chr1	27057616	27057617	chr1_27057616_27057617_T	0	+
chr1	27057618	27057619	chr1_27057618_27057619_A	0	+
chr1	27059141	27059142	chr1_27059141_27059142_A	0	+
chr1	27087845	27087846	chr1_27087845_27087846_A	0	+
chr1	27087850	27087851	chr1_27087850_27087851_T	0	+
chr1	27087851	27087852	chr1_27087851_27087852_A	0	+
chr1	27089435	27089436	chr1_27089435_27089436_A	0	+
chr1	27094244	27094245	chr1_27094244_27094245_G	0	+
chr1	27094245	27094246	chr1_27094245_27094246_A	0	+
chr1	27094249	27094250	chr1_27094249_27094250_A	0	+
chr1	27094255	27094256	chr1_27094255_27094256_A	0	+
chr1	27098969	27098970	chr1_27098969_27098970_A	0	+
chr1	27099279	27099280	chr1_27099279_27099280_A	0	+
chr1	27099799	27099800	chr1_27099799_27099800_T	0	+
chr1	27099800	27099801	chr1_27099800_27099801_T	0	+
chr1	27099801	27099802	chr1_27099801_27099802_A	0	+
chr1	27099813	27099814	chr1_27099813_27099814_A	0	+
chr1	27100791	27100792	chr1_27100791_27100792_A	0	+
chr1	27102048	27102049	chr1_27102048_27102049_A	0	+
chr1	27102050	27102051	chr1_27102050_27102051_A	0	+
chr1	27117225	27117226	chr1_27117225_27117226_A	0	+
chr1	27177607	27177608	chr1_27177607_27177608_A	0	+
chr1	27177608	27177609	chr1_27177608_27177609_A	0	+
chr1	27179218	27179219	chr1_27179218_27179219_A	0	+
chr1	27180191	27180192	chr1_27180191_27180192_A	0	+
chr1	27180215	27180216	chr1_27180215_27180216_G	0	+
chr1	27210809	27210810	chr1_27210809_27210810_A	0	-
chr1	27215636	27215637	chr1_27215636_27215637_A	0	-
chr1	27219973	27219974	chr1_27219973_27219974_A	0	-
chr1	27269086	27269087	chr1_27269086_27269087_A	0	+
chr1	27269120	27269121	chr1_27269120_27269121_A	0	+
chr1	27269121	27269122	chr1_27269121_27269122_A	0	+
chr1	27269124	27269125	chr1_27269124_27269125_A	0	+
chr1	27269127	27269128	chr1_27269127_27269128_T	0	+
chr1	27269129	27269130	chr1_27269129_27269130_A	0	+
chr1	27271853	27271854	chr1_27271853_27271854_C	0	+
chr1	27271854	27271855	chr1_27271854_27271855_C	0	+
chr1	27427788	27427789	chr1_27427788_27427789_A	0	-
chr1	27429257	27429258	chr1_27429257_27429258_G	0	-
chr1	27608692	27608693	chr1_27608692_27608693_A	0	+
chr1	27620985	27620986	chr1_27620985_27620986_A	0	+
chr1	27624404	27624405	chr1_27624404_27624405_G	0	+
chr1	27627691	27627692	chr1_27627691_27627692_A	0	+
chr1	27631461	27631462	chr1_27631461_27631462_T	0	+
chr1	27658536	27658537	chr1_27658536_27658537_A	0	+
chr1	27660424	27660425	chr1_27660424_27660425_T	0	+
chr1	27661844	27661845	chr1_27661844_27661845_A	0	+
chr1	27682278	27682279	chr1_27682278_27682279_A	0	-
chr1	27682279	27682280	chr1_27682279_27682280_A	0	-
chr1	27682289	27682290	chr1_27682289_27682290_A	0	-
chr1	27682293	27682294	chr1_27682293_27682294_A	0	-
chr1	27682612	27682613	chr1_27682612_27682613_A	0	-
chr1	27684385	27684386	chr1_27684385_27684386_A	0	-
chr1	27684392	27684393	chr1_27684392_27684393_A	0	-
chr1	27686028	27686029	chr1_27686028_27686029_A	0	-
chr1	27688378	27688379	chr1_27688378_27688379_A	0	-
chr1	27688382	27688383	chr1_27688382_27688383_A	0	-
chr1	27690921	27690922	chr1_27690921_27690922_C	0	-
chr1	27706710	27706711	chr1_27706710_27706711_A	0	-
chr1	27720277	27720278	chr1_27720277_27720278_A	0	+
chr1	27734867	27734868	chr1_27734867_27734868_C	0	-
chr1	27878729	27878730	chr1_27878729_27878730_A	0	-
chr1	28086973	28086974	chr1_28086973_28086974_A	0	+
chr1	28086982	28086983	chr1_28086982_28086983_G	0	+
chr1	28086984	28086985	chr1_28086984_28086985_A	0	+
chr1	28146133	28146134	chr1_28146133_28146134_A	0	+
chr1	28169663	28169664	chr1_28169663_28169664_A	0	+
chr1	28176551	28176552	chr1_28176551_28176552_A	0	+
chr1	28203075	28203076	chr1_28203075_28203076_A	0	+
chr1	28218786	28218787	chr1_28218786_28218787_G	0	-
chr1	28315197	28315198	chr1_28315197_28315198_A	0	-
chr1	28527904	28527905	chr1_28527904_28527905_A	0	-
chr1	28530353	28530354	chr1_28530353_28530354_A	0	-
chr1	28531888	28531889	chr1_28531888_28531889_A	0	-
chr1	28531894	28531895	chr1_28531894_28531895_A	0	-
chr1	28536596	28536597	chr1_28536596_28536597_A	0	-
chr1	28536604	28536605	chr1_28536604_28536605_A	0	-
chr1	28599068	28599069	chr1_28599068_28599069_A	0	+
chr1	28599847	28599848	chr1_28599847_28599848_A	0	+
chr1	28600525	28600526	chr1_28600525_28600526_A	0	+
chr1	28601310	28601311	chr1_28601310_28601311_A	0	+
chr1	28660904	28660905	chr1_28660904_28660905_A	0	+
chr1	28792851	28792852	chr1_28792851_28792852_A	0	+
chr1	28792861	28792862	chr1_28792861_28792862_C	0	+
chr1	28834611	28834612	chr1_28834611_28834612_A	0	+
chr1	28834613	28834614	chr1_28834613_28834614_T	0	+
chr1	28834614	28834615	chr1_28834614_28834615_A	0	+
chr1	28834615	28834616	chr1_28834615_28834616_A	0	+
chr1	28835310	28835311	chr1_28835310_28835311_A	0	+
chr1	28835313	28835314	chr1_28835313_28835314_A	0	+
chr1	28835318	28835319	chr1_28835318_28835319_A	0	+
chr1	28835319	28835320	chr1_28835319_28835320_A	0	+
chr1	28858285	28858286	chr1_28858285_28858286_A	0	+
chr1	28858661	28858662	chr1_28858661_28858662_A	0	+
chr1	28861538	28861539	chr1_28861538_28861539_A	0	+
chr1	28862090	28862091	chr1_28862090_28862091_A	0	+
chr1	28862357	28862358	chr1_28862357_28862358_A	0	+
chr1	28862359	28862360	chr1_28862359_28862360_C	0	+
chr1	28862736	28862737	chr1_28862736_28862737_A	0	+
chr1	28862749	28862750	chr1_28862749_28862750_T	0	+
chr1	28862750	28862751	chr1_28862750_28862751_G	0	+
chr1	28862751	28862752	chr1_28862751_28862752_A	0	+
chr1	28863228	28863229	chr1_28863228_28863229_T	0	+
chr1	28863229	28863230	chr1_28863229_28863230_A	0	+
chr1	28863230	28863231	chr1_28863230_28863231_T	0	+
chr1	28863231	28863232	chr1_28863231_28863232_T	0	+
chr1	28863236	28863237	chr1_28863236_28863237_A	0	+
chr1	28864316	28864317	chr1_28864316_28864317_A	0	+
chr1	28864322	28864323	chr1_28864322_28864323_A	0	+
chr1	28891184	28891185	chr1_28891184_28891185_C	0	+
chr1	28905206	28905207	chr1_28905206_28905207_A	0	-
chr1	28905214	28905215	chr1_28905214_28905215_A	0	-
chr1	28905215	28905216	chr1_28905215_28905216_C	0	-
chr1	28905216	28905217	chr1_28905216_28905217_A	0	-
chr1	28905217	28905218	chr1_28905217_28905218_C	0	-
chr1	28905219	28905220	chr1_28905219_28905220_A	0	-
chr1	28906121	28906122	chr1_28906121_28906122_A	0	-
chr1	28906509	28906510	chr1_28906509_28906510_A	0	-
chr1	28906515	28906516	chr1_28906515_28906516_A	0	-
chr1	28907183	28907184	chr1_28907183_28907184_A	0	-
chr1	28907185	28907186	chr1_28907185_28907186_T	0	-
chr1	28907186	28907187	chr1_28907186_28907187_A	0	-
chr1	28907768	28907769	chr1_28907768_28907769_A	0	-
chr1	28907769	28907770	chr1_28907769_28907770_A	0	-
chr1	28907770	28907771	chr1_28907770_28907771_T	0	-
chr1	28907773	28907774	chr1_28907773_28907774_A	0	-
chr1	28907774	28907775	chr1_28907774_28907775_A	0	-
chr1	28931998	28931999	chr1_28931998_28931999_A	0	-
chr1	29040558	29040559	chr1_29040558_29040559_A	0	+
chr1	29064099	29064100	chr1_29064099_29064100_T	0	+
chr1	29064100	29064101	chr1_29064100_29064101_A	0	+
chr1	29064748	29064749	chr1_29064748_29064749_A	0	+
chr1	29385061	29385062	chr1_29385061_29385062_A	0	+
chr1	29386891	29386892	chr1_29386891_29386892_A	0	+
chr1	29391454	29391455	chr1_29391454_29391455_A	0	+
chr1	29442180	29442181	chr1_29442180_29442181_C	0	+
chr1	29442184	29442185	chr1_29442184_29442185_A	0	+
chr1	29448388	29448389	chr1_29448388_29448389_A	0	-
chr1	29475761	29475762	chr1_29475761_29475762_A	0	-
chr1	29475763	29475764	chr1_29475763_29475764_A	0	-
chr1	29475765	29475766	chr1_29475765_29475766_A	0	-
chr1	29492603	29492604	chr1_29492603_29492604_A	0	-
chr1	29520713	29520714	chr1_29520713_29520714_T	0	-
chr1	29520731	29520732	chr1_29520731_29520732_A	0	-
chr1	29522545	29522546	chr1_29522545_29522546_A	0	-
chr1	29522555	29522556	chr1_29522555_29522556_A	0	-
chr1	29527127	29527128	chr1_29527127_29527128_C	0	-
chr1	29527128	29527129	chr1_29527128_29527129_C	0	-
chr1	29528582	29528583	chr1_29528582_29528583_A	0	-
chr1	29585749	29585750	chr1_29585749_29585750_A	0	+
chr1	29605942	29605943	chr1_29605942_29605943_A	0	+
chr1	29610429	29610430	chr1_29610429_29610430_A	0	+
chr1	29637940	29637941	chr1_29637940_29637941_A	0	+
chr1	29642493	29642494	chr1_29642493_29642494_A	0	+
chr1	31350039	31350040	chr1_31350039_31350040_G	0	-
chr1	31414148	31414149	chr1_31414148_31414149_A	0	-
chr1	31414154	31414155	chr1_31414154_31414155_A	0	-
chr1	31418360	31418361	chr1_31418360_31418361_A	0	-
chr1	31418364	31418365	chr1_31418364_31418365_T	0	-
chr1	31437777	31437778	chr1_31437777_31437778_A	0	-
chr1	31437783	31437784	chr1_31437783_31437784_A	0	-
chr1	31437823	31437824	chr1_31437823_31437824_A	0	-
chr1	31440192	31440193	chr1_31440192_31440193_A	0	-
chr1	31447670	31447671	chr1_31447670_31447671_A	0	-
chr1	31478900	31478901	chr1_31478900_31478901_A	0	-
chr1	31478903	31478904	chr1_31478903_31478904_A	0	-
chr1	31478908	31478909	chr1_31478908_31478909_A	0	-
chr1	31742105	31742106	chr1_31742105_31742106_A	0	-
chr1	31762297	31762298	chr1_31762297_31762298_A	0	-
chr1	31762301	31762302	chr1_31762301_31762302_A	0	-
chr1	31764874	31764875	chr1_31764874_31764875_A	0	-
chr1	31766218	31766219	chr1_31766218_31766219_A	0	-
chr1	31819463	31819464	chr1_31819463_31819464_A	0	+
chr1	31821651	31821652	chr1_31821651_31821652_A	0	+
chr1	31898142	31898143	chr1_31898142_31898143_A	0	+
chr1	31899467	31899468	chr1_31899467_31899468_A	0	+
chr1	31902218	31902219	chr1_31902218_31902219_A	0	+
chr1	31902223	31902224	chr1_31902223_31902224_G	0	+
chr1	31902224	31902225	chr1_31902224_31902225_A	0	+
chr1	32042713	32042714	chr1_32042713_32042714_C	0	+
chr1	32042714	32042715	chr1_32042714_32042715_C	0	+
chr1	32096422	32096423	chr1_32096422_32096423_A	0	-
chr1	32096487	32096488	chr1_32096487_32096488_A	0	-
chr1	32098259	32098260	chr1_32098259_32098260_C	0	-
chr1	32098264	32098265	chr1_32098264_32098265_C	0	-
chr1	32098270	32098271	chr1_32098270_32098271_C	0	-
chr1	32098274	32098275	chr1_32098274_32098275_A	0	-
chr1	32098939	32098940	chr1_32098939_32098940_A	0	-
chr1	32098967	32098968	chr1_32098967_32098968_A	0	-
chr1	32118477	32118478	chr1_32118477_32118478_C	0	-
chr1	32118497	32118498	chr1_32118497_32118498_A	0	-
chr1	32119674	32119675	chr1_32119674_32119675_A	0	-
chr1	32126265	32126266	chr1_32126265_32126266_A	0	-
chr1	32131238	32131239	chr1_32131238_32131239_C	0	-
chr1	32133845	32133846	chr1_32133845_32133846_A	0	-
chr1	32145306	32145307	chr1_32145306_32145307_A	0	-
chr1	32145723	32145724	chr1_32145723_32145724_A	0	-
chr1	32145911	32145912	chr1_32145911_32145912_A	0	-
chr1	32148992	32148993	chr1_32148992_32148993_A	0	-
chr1	32154127	32154128	chr1_32154127_32154128_A	0	-
chr1	32155474	32155475	chr1_32155474_32155475_A	0	-
chr1	32157698	32157699	chr1_32157698_32157699_A	0	-
chr1	32158780	32158781	chr1_32158780_32158781_A	0	-
chr1	32159794	32159795	chr1_32159794_32159795_A	0	-
chr1	32161770	32161771	chr1_32161770_32161771_A	0	-
chr1	32162929	32162930	chr1_32162929_32162930_A	0	-
chr1	32193236	32193237	chr1_32193236_32193237_A	0	-
chr1	32197047	32197048	chr1_32197047_32197048_A	0	-
chr1	32197799	32197800	chr1_32197799_32197800_A	0	-
chr1	32198270	32198271	chr1_32198270_32198271_A	0	-
chr1	32203377	32203378	chr1_32203377_32203378_A	0	-
chr1	32206166	32206167	chr1_32206166_32206167_A	0	-
chr1	32207850	32207851	chr1_32207850_32207851_A	0	-
chr1	32222435	32222436	chr1_32222435_32222436_A	0	-
chr1	32263947	32263948	chr1_32263947_32263948_A	0	-
chr1	32374584	32374585	chr1_32374584_32374585_A	0	-
chr1	32374591	32374592	chr1_32374591_32374592_A	0	-
chr1	32375734	32375735	chr1_32375734_32375735_A	0	-
chr1	32381612	32381613	chr1_32381612_32381613_A	0	-
chr1	32385275	32385276	chr1_32385275_32385276_A	0	-
chr1	32385284	32385285	chr1_32385284_32385285_A	0	-
chr1	32498764	32498765	chr1_32498764_32498765_A	0	+
chr1	32503405	32503406	chr1_32503405_32503406_C	0	+
chr1	32503409	32503410	chr1_32503409_32503410_A	0	+
chr1	32503413	32503414	chr1_32503413_32503414_A	0	+
chr1	32503414	32503415	chr1_32503414_32503415_A	0	+
chr1	32503419	32503420	chr1_32503419_32503420_A	0	+
chr1	32503430	32503431	chr1_32503430_32503431_T	0	+
chr1	32504116	32504117	chr1_32504116_32504117_A	0	+
chr1	32504120	32504121	chr1_32504120_32504121_T	0	+
chr1	32504122	32504123	chr1_32504122_32504123_T	0	+
chr1	32504123	32504124	chr1_32504123_32504124_A	0	+
chr1	32504128	32504129	chr1_32504128_32504129_A	0	+
chr1	32505093	32505094	chr1_32505093_32505094_A	0	+
chr1	32541177	32541178	chr1_32541177_32541178_T	0	+
chr1	32541240	32541241	chr1_32541240_32541241_G	0	+
chr1	32542737	32542738	chr1_32542737_32542738_A	0	+
chr1	32560377	32560378	chr1_32560377_32560378_C	0	+
chr1	32561233	32561234	chr1_32561233_32561234_A	0	+
chr1	32622431	32622432	chr1_32622431_32622432_A	0	+
chr1	32622927	32622928	chr1_32622927_32622928_A	0	+
chr1	32623844	32623845	chr1_32623844_32623845_A	0	+
chr1	32624963	32624964	chr1_32624963_32624964_A	0	+
chr1	32624975	32624976	chr1_32624975_32624976_A	0	+
chr1	32627520	32627521	chr1_32627520_32627521_A	0	+
chr1	32627931	32627932	chr1_32627931_32627932_T	0	+
chr1	32627935	32627936	chr1_32627935_32627936_A	0	+
chr1	32627937	32627938	chr1_32627937_32627938_T	0	+
chr1	32627945	32627946	chr1_32627945_32627946_A	0	+
chr1	32628813	32628814	chr1_32628813_32628814_A	0	+
chr1	32635458	32635459	chr1_32635458_32635459_A	0	+
chr1	32636270	32636271	chr1_32636270_32636271_A	0	+
chr1	32636274	32636275	chr1_32636274_32636275_A	0	+
chr1	32646794	32646795	chr1_32646794_32646795_T	0	+
chr1	32646795	32646796	chr1_32646795_32646796_A	0	+
chr1	32646797	32646798	chr1_32646797_32646798_A	0	+
chr1	32646798	32646799	chr1_32646798_32646799_A	0	+
chr1	32646813	32646814	chr1_32646813_32646814_A	0	+
chr1	32650100	32650101	chr1_32650100_32650101_A	0	+
chr1	32653527	32653528	chr1_32653527_32653528_A	0	+
chr1	32655626	32655627	chr1_32655626_32655627_A	0	+
chr1	32657880	32657881	chr1_32657880_32657881_A	0	+
chr1	32658772	32658773	chr1_32658772_32658773_A	0	+
chr1	32658782	32658783	chr1_32658782_32658783_A	0	+
chr1	32659634	32659635	chr1_32659634_32659635_A	0	+
chr1	32671725	32671726	chr1_32671725_32671726_G	0	+
chr1	32672082	32672083	chr1_32672082_32672083_G	0	+
chr1	32672089	32672090	chr1_32672089_32672090_A	0	+
chr1	32672577	32672578	chr1_32672577_32672578_C	0	+
chr1	32680842	32680843	chr1_32680842_32680843_A	0	-
chr1	32681415	32681416	chr1_32681415_32681416_A	0	-
chr1	32681420	32681421	chr1_32681420_32681421_C	0	-
chr1	32682568	32682569	chr1_32682568_32682569_G	0	-
chr1	32682578	32682579	chr1_32682578_32682579_A	0	-
chr1	32682583	32682584	chr1_32682583_32682584_A	0	-
chr1	32683036	32683037	chr1_32683036_32683037_G	0	-
chr1	32686821	32686822	chr1_32686821_32686822_A	0	-
chr1	32689596	32689597	chr1_32689596_32689597_A	0	+
chr1	32689997	32689998	chr1_32689997_32689998_A	0	+
chr1	32689998	32689999	chr1_32689998_32689999_A	0	+
chr1	32694074	32694075	chr1_32694074_32694075_A	0	+
chr1	32694710	32694711	chr1_32694710_32694711_A	0	+
chr1	32694714	32694715	chr1_32694714_32694715_A	0	+
chr1	32696506	32696507	chr1_32696506_32696507_A	0	+
chr1	32706477	32706478	chr1_32706477_32706478_A	0	-
chr1	32793118	32793119	chr1_32793118_32793119_A	0	+
chr1	32794639	32794640	chr1_32794639_32794640_A	0	+
chr1	32794645	32794646	chr1_32794645_32794646_A	0	+
chr1	32794650	32794651	chr1_32794650_32794651_A	0	+
chr1	32797047	32797048	chr1_32797047_32797048_G	0	+
chr1	32797048	32797049	chr1_32797048_32797049_A	0	+
chr1	32797664	32797665	chr1_32797664_32797665_C	0	+
chr1	32797665	32797666	chr1_32797665_32797666_A	0	+
chr1	32798267	32798268	chr1_32798267_32798268_T	0	+
chr1	32798269	32798270	chr1_32798269_32798270_C	0	+
chr1	32798270	32798271	chr1_32798270_32798271_C	0	+
chr1	32798278	32798279	chr1_32798278_32798279_A	0	+
chr1	32798286	32798287	chr1_32798286_32798287_A	0	+
chr1	32798592	32798593	chr1_32798592_32798593_A	0	+
chr1	32800721	32800722	chr1_32800721_32800722_A	0	-
chr1	32834172	32834173	chr1_32834172_32834173_A	0	-
chr1	32842372	32842373	chr1_32842372_32842373_C	0	-
chr1	32843907	32843908	chr1_32843907_32843908_A	0	-
chr1	32844464	32844465	chr1_32844464_32844465_A	0	-
chr1	32846903	32846904	chr1_32846903_32846904_A	0	-
chr1	32859759	32859760	chr1_32859759_32859760_A	0	-
chr1	32859762	32859763	chr1_32859762_32859763_C	0	-
chr1	32859763	32859764	chr1_32859763_32859764_C	0	-
chr1	32859764	32859765	chr1_32859764_32859765_G	0	-
chr1	32859765	32859766	chr1_32859765_32859766_T	0	-
chr1	33093170	33093171	chr1_33093170_33093171_A	0	-
chr1	33099743	33099744	chr1_33099743_33099744_A	0	-
chr1	33117485	33117486	chr1_33117485_33117486_T	0	+
chr1	33117486	33117487	chr1_33117486_33117487_A	0	+
chr1	33117487	33117488	chr1_33117487_33117488_A	0	+
chr1	33117491	33117492	chr1_33117491_33117492_A	0	+
chr1	33123010	33123011	chr1_33123010_33123011_A	0	+
chr1	33133802	33133803	chr1_33133802_33133803_A	0	+
chr1	33134312	33134313	chr1_33134312_33134313_A	0	+
chr1	33134319	33134320	chr1_33134319_33134320_A	0	+
chr1	33134550	33134551	chr1_33134550_33134551_A	0	+
chr1	33145208	33145209	chr1_33145208_33145209_A	0	+
chr1	33234226	33234227	chr1_33234226_33234227_A	0	+
chr1	33234230	33234231	chr1_33234230_33234231_A	0	+
chr1	33235243	33235244	chr1_33235243_33235244_A	0	+
chr1	33235244	33235245	chr1_33235244_33235245_A	0	+
chr1	33238440	33238441	chr1_33238440_33238441_A	0	+
chr1	33241716	33241717	chr1_33241716_33241717_A	0	-
chr1	33245151	33245152	chr1_33245151_33245152_A	0	-
chr1	33245157	33245158	chr1_33245157_33245158_A	0	-
chr1	33245902	33245903	chr1_33245902_33245903_C	0	-
chr1	33245910	33245911	chr1_33245910_33245911_A	0	-
chr1	33245916	33245917	chr1_33245916_33245917_A	0	-
chr1	33245920	33245921	chr1_33245920_33245921_A	0	-
chr1	33246767	33246768	chr1_33246767_33246768_A	0	-
chr1	33248162	33248163	chr1_33248162_33248163_C	0	-
chr1	33248163	33248164	chr1_33248163_33248164_A	0	-
chr1	33252705	33252706	chr1_33252705_33252706_A	0	-
chr1	33276395	33276396	chr1_33276395_33276396_A	0	-
chr1	33291672	33291673	chr1_33291672_33291673_A	0	+
chr1	33293559	33293560	chr1_33293559_33293560_A	0	+
chr1	33402884	33402885	chr1_33402884_33402885_A	0	-
chr1	33408089	33408090	chr1_33408089_33408090_C	0	-
chr1	33476473	33476474	chr1_33476473_33476474_A	0	-
chr1	33476474	33476475	chr1_33476474_33476475_A	0	-
chr1	33477748	33477749	chr1_33477748_33477749_A	0	-
chr1	33479024	33479025	chr1_33479024_33479025_A	0	-
chr1	33480216	33480217	chr1_33480216_33480217_A	0	-
chr1	33487334	33487335	chr1_33487334_33487335_A	0	-
chr1	33747166	33747167	chr1_33747166_33747167_A	0	+
chr1	33747167	33747168	chr1_33747167_33747168_A	0	+
chr1	33795845	33795846	chr1_33795845_33795846_A	0	-
chr1	33795854	33795855	chr1_33795854_33795855_A	0	-
chr1	33797095	33797096	chr1_33797095_33797096_A	0	-
chr1	33820199	33820200	chr1_33820199_33820200_A	0	-
chr1	33833049	33833050	chr1_33833049_33833050_C	0	-
chr1	33833050	33833051	chr1_33833050_33833051_C	0	-
chr1	35469628	35469629	chr1_35469628_35469629_A	0	-
chr1	35469629	35469630	chr1_35469629_35469630_A	0	-
chr1	35470903	35470904	chr1_35470903_35470904_A	0	-
chr1	35474567	35474568	chr1_35474567_35474568_A	0	-
chr1	35476666	35476667	chr1_35476666_35476667_A	0	-
chr1	35478201	35478202	chr1_35478201_35478202_A	0	-
chr1	35496333	35496334	chr1_35496333_35496334_A	0	-
chr1	35561384	35561385	chr1_35561384_35561385_A	0	+
chr1	35562883	35562884	chr1_35562883_35562884_A	0	+
chr1	35575858	35575859	chr1_35575858_35575859_A	0	+
chr1	35575871	35575872	chr1_35575871_35575872_A	0	+
chr1	35642089	35642090	chr1_35642089_35642090_A	0	-
chr1	35642092	35642093	chr1_35642092_35642093_A	0	-
chr1	35642093	35642094	chr1_35642093_35642094_A	0	-
chr1	35642094	35642095	chr1_35642094_35642095_T	0	-
chr1	35642096	35642097	chr1_35642096_35642097_A	0	-
chr1	35642151	35642152	chr1_35642151_35642152_A	0	-
chr1	35643021	35643022	chr1_35643021_35643022_A	0	-
chr1	35650328	35650329	chr1_35650328_35650329_A	0	-
chr1	35650329	35650330	chr1_35650329_35650330_T	0	-
chr1	35650330	35650331	chr1_35650330_35650331_C	0	-
chr1	35650331	35650332	chr1_35650331_35650332_T	0	-
chr1	35650332	35650333	chr1_35650332_35650333_T	0	-
chr1	35650333	35650334	chr1_35650333_35650334_T	0	-
chr1	35650334	35650335	chr1_35650334_35650335_C	0	-
chr1	35650336	35650337	chr1_35650336_35650337_T	0	-
chr1	35650338	35650339	chr1_35650338_35650339_T	0	-
chr1	35650356	35650357	chr1_35650356_35650357_A	0	-
chr1	35650357	35650358	chr1_35650357_35650358_A	0	-
chr1	35650365	35650366	chr1_35650365_35650366_C	0	-
chr1	35652872	35652873	chr1_35652872_35652873_A	0	-
chr1	35652876	35652877	chr1_35652876_35652877_A	0	-
chr1	35653709	35653710	chr1_35653709_35653710_A	0	-
chr1	35653713	35653714	chr1_35653713_35653714_A	0	-
chr1	35653717	35653718	chr1_35653717_35653718_A	0	-
chr1	35653719	35653720	chr1_35653719_35653720_T	0	-
chr1	35653724	35653725	chr1_35653724_35653725_A	0	-
chr1	35655007	35655008	chr1_35655007_35655008_A	0	-
chr1	35655015	35655016	chr1_35655015_35655016_A	0	-
chr1	35656618	35656619	chr1_35656618_35656619_A	0	-
chr1	35657153	35657154	chr1_35657153_35657154_A	0	-
chr1	35657157	35657158	chr1_35657157_35657158_T	0	-
chr1	35826754	35826755	chr1_35826754_35826755_A	0	+
chr1	35827187	35827188	chr1_35827187_35827188_A	0	+
chr1	35827194	35827195	chr1_35827194_35827195_A	0	+
chr1	35827198	35827199	chr1_35827198_35827199_A	0	+
chr1	35835914	35835915	chr1_35835914_35835915_A	0	+
chr1	35835937	35835938	chr1_35835937_35835938_A	0	+
chr1	35851012	35851013	chr1_35851012_35851013_A	0	+
chr1	35851647	35851648	chr1_35851647_35851648_C	0	+
chr1	35851648	35851649	chr1_35851648_35851649_A	0	+
chr1	35852571	35852572	chr1_35852571_35852572_A	0	+
chr1	35854480	35854481	chr1_35854480_35854481_A	0	+
chr1	35858213	35858214	chr1_35858213_35858214_A	0	+
chr1	35858222	35858223	chr1_35858222_35858223_A	0	+
chr1	35862111	35862112	chr1_35862111_35862112_A	0	+
chr1	35862956	35862957	chr1_35862956_35862957_A	0	+
chr1	35862961	35862962	chr1_35862961_35862962_A	0	+
chr1	35864429	35864430	chr1_35864429_35864430_A	0	+
chr1	35864442	35864443	chr1_35864442_35864443_A	0	+
chr1	35864443	35864444	chr1_35864443_35864444_A	0	+
chr1	35865049	35865050	chr1_35865049_35865050_A	0	+
chr1	35865054	35865055	chr1_35865054_35865055_A	0	+
chr1	35879541	35879542	chr1_35879541_35879542_A	0	+
chr1	35881033	35881034	chr1_35881033_35881034_A	0	+
chr1	35907958	35907959	chr1_35907958_35907959_A	0	-
chr1	35907965	35907966	chr1_35907965_35907966_A	0	-
chr1	35915633	35915634	chr1_35915633_35915634_A	0	-
chr1	35916134	35916135	chr1_35916134_35916135_A	0	-
chr1	35916139	35916140	chr1_35916139_35916140_A	0	-
chr1	35917399	35917400	chr1_35917399_35917400_C	0	-
chr1	35917400	35917401	chr1_35917400_35917401_A	0	-
chr1	35920107	35920108	chr1_35920107_35920108_A	0	-
chr1	35921868	35921869	chr1_35921868_35921869_A	0	-
chr1	35926061	35926062	chr1_35926061_35926062_A	0	-
chr1	35926062	35926063	chr1_35926062_35926063_T	0	-
chr1	35926068	35926069	chr1_35926068_35926069_A	0	-
chr1	35928350	35928351	chr1_35928350_35928351_C	0	-
chr1	36024632	36024633	chr1_36024632_36024633_A	0	+
chr1	36024687	36024688	chr1_36024687_36024688_A	0	+
chr1	36025903	36025904	chr1_36025903_36025904_A	0	+
chr1	36028758	36028759	chr1_36028758_36028759_A	0	+
chr1	36028765	36028766	chr1_36028765_36028766_C	0	+
chr1	36029337	36029338	chr1_36029337_36029338_A	0	+
chr1	36029343	36029344	chr1_36029343_36029344_A	0	+
chr1	36029345	36029346	chr1_36029345_36029346_C	0	+
chr1	36030799	36030800	chr1_36030799_36030800_A	0	+
chr1	36069000	36069001	chr1_36069000_36069001_C	0	-
chr1	36069012	36069013	chr1_36069012_36069013_A	0	-
chr1	36075036	36075037	chr1_36075036_36075037_A	0	-
chr1	36102057	36102058	chr1_36102057_36102058_T	0	-
chr1	36202226	36202227	chr1_36202226_36202227_A	0	-
chr1	36202696	36202697	chr1_36202696_36202697_A	0	-
chr1	36203046	36203047	chr1_36203046_36203047_A	0	-
chr1	36203731	36203732	chr1_36203731_36203732_A	0	-
chr1	36204204	36204205	chr1_36204204_36204205_A	0	-
chr1	36205166	36205167	chr1_36205166_36205167_A	0	-
chr1	36208868	36208869	chr1_36208868_36208869_A	0	-
chr1	36212622	36212623	chr1_36212622_36212623_A	0	-
chr1	36213708	36213709	chr1_36213708_36213709_A	0	-
chr1	36215450	36215451	chr1_36215450_36215451_A	0	-
chr1	36226831	36226832	chr1_36226831_36226832_A	0	-
chr1	36226835	36226836	chr1_36226835_36226836_A	0	-
chr1	36230339	36230340	chr1_36230339_36230340_A	0	-
chr1	36297634	36297635	chr1_36297634_36297635_A	0	+
chr1	36297974	36297975	chr1_36297974_36297975_A	0	+
chr1	36297975	36297976	chr1_36297975_36297976_A	0	+
chr1	36358131	36358132	chr1_36358131_36358132_C	0	+
chr1	36359168	36359169	chr1_36359168_36359169_A	0	+
chr1	36359248	36359249	chr1_36359248_36359249_A	0	+
chr1	36359251	36359252	chr1_36359251_36359252_A	0	+
chr1	36359252	36359253	chr1_36359252_36359253_G	0	+
chr1	36359257	36359258	chr1_36359257_36359258_C	0	+
chr1	36359606	36359607	chr1_36359606_36359607_G	0	+
chr1	36359608	36359609	chr1_36359608_36359609_G	0	+
chr1	36359611	36359612	chr1_36359611_36359612_G	0	+
chr1	36359612	36359613	chr1_36359612_36359613_A	0	+
chr1	36367524	36367525	chr1_36367524_36367525_A	0	+
chr1	36379756	36379757	chr1_36379756_36379757_A	0	+
chr1	36383150	36383151	chr1_36383150_36383151_A	0	+
chr1	36384624	36384625	chr1_36384624_36384625_C	0	+
chr1	36384625	36384626	chr1_36384625_36384626_C	0	+
chr1	36384630	36384631	chr1_36384630_36384631_A	0	+
chr1	36384637	36384638	chr1_36384637_36384638_A	0	+
chr1	36385064	36385065	chr1_36385064_36385065_A	0	+
chr1	36385074	36385075	chr1_36385074_36385075_A	0	+
chr1	36438951	36438952	chr1_36438951_36438952_A	0	+
chr1	36474475	36474476	chr1_36474475_36474476_A	0	+
chr1	36505873	36505874	chr1_36505873_36505874_A	0	+
chr1	36505882	36505883	chr1_36505882_36505883_A	0	+
chr1	36508999	36509000	chr1_36508999_36509000_A	0	+
chr1	36509000	36509001	chr1_36509000_36509001_T	0	+
chr1	36521206	36521207	chr1_36521206_36521207_G	0	+
chr1	36521209	36521210	chr1_36521209_36521210_T	0	+
chr1	36521218	36521219	chr1_36521218_36521219_A	0	+
chr1	36557185	36557186	chr1_36557185_36557186_A	0	+
chr1	36557186	36557187	chr1_36557186_36557187_A	0	+
chr1	36557191	36557192	chr1_36557191_36557192_A	0	+
chr1	36558680	36558681	chr1_36558680_36558681_A	0	+
chr1	36602942	36602943	chr1_36602942_36602943_G	0	-
chr1	36602949	36602950	chr1_36602949_36602950_C	0	-
chr1	36603603	36603604	chr1_36603603_36603604_A	0	-
chr1	36603605	36603606	chr1_36603605_36603606_A	0	-
chr1	36603609	36603610	chr1_36603609_36603610_C	0	-
chr1	36605447	36605448	chr1_36605447_36605448_A	0	-
chr1	36605450	36605451	chr1_36605450_36605451_A	0	-
chr1	36637084	36637085	chr1_36637084_36637085_A	0	+
chr1	36638034	36638035	chr1_36638034_36638035_A	0	+
chr1	36638038	36638039	chr1_36638038_36638039_A	0	+
chr1	36638043	36638044	chr1_36638043_36638044_A	0	+
chr1	36638935	36638936	chr1_36638935_36638936_A	0	+
chr1	36641768	36641769	chr1_36641768_36641769_T	0	+
chr1	36641770	36641771	chr1_36641770_36641771_A	0	+
chr1	36643994	36643995	chr1_36643994_36643995_C	0	+
chr1	36645091	36645092	chr1_36645091_36645092_G	0	+
chr1	36645092	36645093	chr1_36645092_36645093_A	0	+
chr1	36645820	36645821	chr1_36645820_36645821_G	0	+
chr1	36645821	36645822	chr1_36645821_36645822_A	0	+
chr1	36748100	36748101	chr1_36748100_36748101_A	0	+
chr1	36754619	36754620	chr1_36754619_36754620_A	0	+
chr1	36756945	36756946	chr1_36756945_36756946_A	0	+
chr1	36758171	36758172	chr1_36758171_36758172_A	0	+
chr1	36758173	36758174	chr1_36758173_36758174_A	0	+
chr1	36759427	36759428	chr1_36759427_36759428_A	0	+
chr1	36767118	36767119	chr1_36767118_36767119_A	0	+
chr1	36767128	36767129	chr1_36767128_36767129_C	0	+
chr1	36775124	36775125	chr1_36775124_36775125_A	0	+
chr1	36807618	36807619	chr1_36807618_36807619_A	0	-
chr1	36809068	36809069	chr1_36809068_36809069_A	0	-
chr1	36809070	36809071	chr1_36809070_36809071_T	0	-
chr1	36820048	36820049	chr1_36820048_36820049_A	0	-
chr1	36821061	36821062	chr1_36821061_36821062_A	0	-
chr1	36824002	36824003	chr1_36824002_36824003_A	0	-
chr1	36824013	36824014	chr1_36824013_36824014_G	0	-
chr1	36824027	36824028	chr1_36824027_36824028_A	0	-
chr1	36824439	36824440	chr1_36824439_36824440_A	0	-
chr1	36921557	36921558	chr1_36921557_36921558_C	0	-
chr1	36921995	36921996	chr1_36921995_36921996_A	0	-
chr1	36921997	36921998	chr1_36921997_36921998_T	0	-
chr1	36923605	36923606	chr1_36923605_36923606_A	0	-
chr1	36926406	36926407	chr1_36926406_36926407_A	0	-
chr1	36926933	36926934	chr1_36926933_36926934_A	0	-
chr1	36926971	36926972	chr1_36926971_36926972_A	0	-
chr1	37941030	37941031	chr1_37941030_37941031_C	0	+
chr1	37945869	37945870	chr1_37945869_37945870_A	0	+
chr1	37947173	37947174	chr1_37947173_37947174_T	0	+
chr1	37947175	37947176	chr1_37947175_37947176_A	0	+
chr1	37947925	37947926	chr1_37947925_37947926_G	0	+
chr1	37948007	37948008	chr1_37948007_37948008_C	0	+
chr1	37948009	37948010	chr1_37948009_37948010_A	0	+
chr1	37948011	37948012	chr1_37948011_37948012_A	0	+
chr1	37948311	37948312	chr1_37948311_37948312_A	0	+
chr1	37961550	37961551	chr1_37961550_37961551_A	0	-
chr1	37967626	37967627	chr1_37967626_37967627_A	0	-
chr1	38003638	38003639	chr1_38003638_38003639_A	0	-
chr1	38032631	38032632	chr1_38032631_38032632_A	0	-
chr1	38033398	38033399	chr1_38033398_38033399_A	0	-
chr1	38033977	38033978	chr1_38033977_38033978_A	0	-
chr1	38033983	38033984	chr1_38033983_38033984_A	0	-
chr1	38033986	38033987	chr1_38033986_38033987_A	0	-
chr1	38033989	38033990	chr1_38033989_38033990_A	0	-
chr1	38033991	38033992	chr1_38033991_38033992_A	0	-
chr1	38040083	38040084	chr1_38040083_38040084_A	0	-
chr1	38040446	38040447	chr1_38040446_38040447_A	0	-
chr1	38040450	38040451	chr1_38040450_38040451_A	0	-
chr1	38040451	38040452	chr1_38040451_38040452_A	0	-
chr1	38040452	38040453	chr1_38040452_38040453_T	0	-
chr1	38042188	38042189	chr1_38042188_38042189_A	0	-
chr1	38042193	38042194	chr1_38042193_38042194_A	0	-
chr1	38047175	38047176	chr1_38047175_38047176_T	0	-
chr1	38047959	38047960	chr1_38047959_38047960_A	0	-
chr1	38047960	38047961	chr1_38047960_38047961_A	0	-
chr1	38047961	38047962	chr1_38047961_38047962_A	0	-
chr1	38047964	38047965	chr1_38047964_38047965_A	0	-
chr1	38047969	38047970	chr1_38047969_38047970_A	0	-
chr1	38047971	38047972	chr1_38047971_38047972_G	0	-
chr1	38047974	38047975	chr1_38047974_38047975_A	0	-
chr1	38048563	38048564	chr1_38048563_38048564_A	0	-
chr1	38049556	38049557	chr1_38049556_38049557_A	0	-
chr1	38056475	38056476	chr1_38056475_38056476_A	0	-
chr1	38058434	38058435	chr1_38058434_38058435_A	0	-
chr1	38148861	38148862	chr1_38148861_38148862_A	0	-
chr1	38155589	38155590	chr1_38155589_38155590_A	0	-
chr1	38155590	38155591	chr1_38155590_38155591_A	0	-
chr1	38155592	38155593	chr1_38155592_38155593_C	0	-
chr1	38166070	38166071	chr1_38166070_38166071_A	0	+
chr1	38166079	38166080	chr1_38166079_38166080_A	0	+
chr1	38166081	38166082	chr1_38166081_38166082_C	0	+
chr1	38166082	38166083	chr1_38166082_38166083_A	0	+
chr1	38168895	38168896	chr1_38168895_38168896_A	0	+
chr1	38168902	38168903	chr1_38168902_38168903_A	0	+
chr1	38168906	38168907	chr1_38168906_38168907_C	0	+
chr1	38168908	38168909	chr1_38168908_38168909_A	0	+
chr1	38171085	38171086	chr1_38171085_38171086_A	0	+
chr1	38171091	38171092	chr1_38171091_38171092_A	0	+
chr1	38172631	38172632	chr1_38172631_38172632_A	0	+
chr1	38173967	38173968	chr1_38173967_38173968_A	0	+
chr1	38269689	38269690	chr1_38269689_38269690_A	0	-
chr1	38269826	38269827	chr1_38269826_38269827_T	0	-
chr1	38272673	38272674	chr1_38272673_38272674_A	0	-
chr1	38272914	38272915	chr1_38272914_38272915_A	0	-
chr1	38288413	38288414	chr1_38288413_38288414_A	0	-
chr1	38288417	38288418	chr1_38288417_38288418_A	0	-
chr1	38330117	38330118	chr1_38330117_38330118_A	0	-
chr1	38334306	38334307	chr1_38334306_38334307_A	0	-
chr1	38338862	38338863	chr1_38338862_38338863_A	0	-
chr1	38339849	38339850	chr1_38339849_38339850_A	0	-
chr1	38339850	38339851	chr1_38339850_38339851_C	0	-
chr1	38344015	38344016	chr1_38344015_38344016_A	0	-
chr1	38344019	38344020	chr1_38344019_38344020_T	0	-
chr1	38344189	38344190	chr1_38344189_38344190_A	0	-
chr1	38352692	38352693	chr1_38352692_38352693_A	0	-
chr1	38352697	38352698	chr1_38352697_38352698_A	0	-
chr1	38354036	38354037	chr1_38354036_38354037_A	0	-
chr1	38355424	38355425	chr1_38355424_38355425_A	0	-
chr1	38411535	38411536	chr1_38411535_38411536_A	0	-
chr1	38411536	38411537	chr1_38411536_38411537_G	0	-
chr1	38411537	38411538	chr1_38411537_38411538_T	0	-
chr1	38412034	38412035	chr1_38412034_38412035_A	0	-
chr1	38423959	38423960	chr1_38423959_38423960_A	0	-
chr1	38433834	38433835	chr1_38433834_38433835_A	0	-
chr1	38442648	38442649	chr1_38442648_38442649_A	0	-
chr1	38444747	38444748	chr1_38444747_38444748_A	0	-
chr1	38444755	38444756	chr1_38444755_38444756_A	0	-
chr1	38444761	38444762	chr1_38444761_38444762_A	0	-
chr1	38445229	38445230	chr1_38445229_38445230_A	0	-
chr1	38445230	38445231	chr1_38445230_38445231_A	0	-
chr1	38446414	38446415	chr1_38446414_38446415_A	0	-
chr1	38449950	38449951	chr1_38449950_38449951_A	0	-
chr1	38449954	38449955	chr1_38449954_38449955_A	0	-
chr1	38449957	38449958	chr1_38449957_38449958_A	0	-
chr1	38449960	38449961	chr1_38449960_38449961_T	0	-
chr1	38453530	38453531	chr1_38453530_38453531_A	0	-
chr1	38455297	38455298	chr1_38455297_38455298_A	0	-
chr1	38465132	38465133	chr1_38465132_38465133_A	0	-
chr1	38484102	38484103	chr1_38484102_38484103_A	0	+
chr1	38488346	38488347	chr1_38488346_38488347_A	0	+
chr1	38489191	38489192	chr1_38489191_38489192_T	0	+
chr1	39321609	39321610	chr1_39321609_39321610_A	0	-
chr1	39332693	39332694	chr1_39332693_39332694_A	0	-
chr1	39332694	39332695	chr1_39332694_39332695_A	0	-
chr1	39358918	39358919	chr1_39358918_39358919_A	0	-
chr1	39469685	39469686	chr1_39469685_39469686_A	0	+
chr1	39749704	39749705	chr1_39749704_39749705_A	0	+
chr1	39752917	39752918	chr1_39752917_39752918_A	0	+
chr1	39757552	39757553	chr1_39757552_39757553_A	0	+
chr1	39757557	39757558	chr1_39757557_39757558_A	0	+
chr1	39758406	39758407	chr1_39758406_39758407_A	0	+
chr1	39760689	39760690	chr1_39760689_39760690_A	0	+
chr1	39763268	39763269	chr1_39763268_39763269_A	0	+
chr1	39763274	39763275	chr1_39763274_39763275_A	0	+
chr1	39775874	39775875	chr1_39775874_39775875_A	0	+
chr1	39775890	39775891	chr1_39775890_39775891_A	0	+
chr1	39776472	39776473	chr1_39776472_39776473_T	0	+
chr1	39776473	39776474	chr1_39776473_39776474_A	0	+
chr1	39782854	39782855	chr1_39782854_39782855_A	0	+
chr1	39784098	39784099	chr1_39784098_39784099_A	0	+
chr1	39784103	39784104	chr1_39784103_39784104_A	0	+
chr1	39790287	39790288	chr1_39790287_39790288_A	0	+
chr1	39790288	39790289	chr1_39790288_39790289_A	0	+
chr1	39802825	39802826	chr1_39802825_39802826_T	0	+
chr1	39802827	39802828	chr1_39802827_39802828_A	0	+
chr1	39815109	39815110	chr1_39815109_39815110_A	0	+
chr1	39815128	39815129	chr1_39815128_39815129_A	0	+
chr1	39816432	39816433	chr1_39816432_39816433_C	0	+
chr1	39816434	39816435	chr1_39816434_39816435_A	0	+
chr1	39824333	39824334	chr1_39824333_39824334_G	0	+
chr1	39824776	39824777	chr1_39824776_39824777_A	0	+
chr1	39827007	39827008	chr1_39827007_39827008_T	0	+
chr1	39827009	39827010	chr1_39827009_39827010_A	0	+
chr1	39835675	39835676	chr1_39835675_39835676_A	0	+
chr1	39835680	39835681	chr1_39835680_39835681_A	0	+
chr1	39838122	39838123	chr1_39838122_39838123_A	0	+
chr1	39844846	39844847	chr1_39844846_39844847_A	0	+
chr1	39888373	39888374	chr1_39888373_39888374_A	0	+
chr1	39889675	39889676	chr1_39889675_39889676_A	0	+
chr1	39893566	39893567	chr1_39893566_39893567_A	0	+
chr1	39893580	39893581	chr1_39893580_39893581_A	0	+
chr1	39893584	39893585	chr1_39893584_39893585_T	0	+
chr1	39893587	39893588	chr1_39893587_39893588_A	0	+
chr1	39893591	39893592	chr1_39893591_39893592_A	0	+
chr1	39893605	39893606	chr1_39893605_39893606_A	0	+
chr1	39893609	39893610	chr1_39893609_39893610_A	0	+
chr1	39894893	39894894	chr1_39894893_39894894_A	0	+
chr1	39895477	39895478	chr1_39895477_39895478_A	0	+
chr1	39898700	39898701	chr1_39898700_39898701_T	0	+
chr1	39898701	39898702	chr1_39898701_39898702_A	0	+
chr1	39898704	39898705	chr1_39898704_39898705_G	0	+
chr1	39900054	39900055	chr1_39900054_39900055_A	0	+
chr1	39902014	39902015	chr1_39902014_39902015_A	0	+
chr1	39904916	39904917	chr1_39904916_39904917_A	0	+
chr1	39904920	39904921	chr1_39904920_39904921_A	0	+
chr1	39906651	39906652	chr1_39906651_39906652_A	0	+
chr1	39906875	39906876	chr1_39906875_39906876_A	0	+
chr1	39906879	39906880	chr1_39906879_39906880_A	0	+
chr1	39907597	39907598	chr1_39907597_39907598_G	0	+
chr1	39907598	39907599	chr1_39907598_39907599_A	0	+
chr1	39909086	39909087	chr1_39909086_39909087_T	0	+
chr1	39909088	39909089	chr1_39909088_39909089_A	0	+
chr1	39910308	39910309	chr1_39910308_39910309_A	0	+
chr1	39910310	39910311	chr1_39910310_39910311_A	0	+
chr1	39917799	39917800	chr1_39917799_39917800_A	0	+
chr1	39918322	39918323	chr1_39918322_39918323_A	0	+
chr1	39918330	39918331	chr1_39918330_39918331_A	0	+
chr1	39918331	39918332	chr1_39918331_39918332_A	0	+
chr1	39919334	39919335	chr1_39919334_39919335_A	0	+
chr1	39919347	39919348	chr1_39919347_39919348_A	0	+
chr1	39919349	39919350	chr1_39919349_39919350_G	0	+
chr1	39920557	39920558	chr1_39920557_39920558_A	0	+
chr1	39924720	39924721	chr1_39924720_39924721_C	0	+
chr1	39929254	39929255	chr1_39929254_39929255_A	0	+
chr1	39930704	39930705	chr1_39930704_39930705_A	0	+
chr1	39945441	39945442	chr1_39945441_39945442_A	0	+
chr1	39946525	39946526	chr1_39946525_39946526_A	0	+
chr1	39946552	39946553	chr1_39946552_39946553_A	0	+
chr1	39950249	39950250	chr1_39950249_39950250_A	0	+
chr1	39951181	39951182	chr1_39951181_39951182_A	0	+
chr1	40026819	40026820	chr1_40026819_40026820_A	0	-
chr1	40026823	40026824	chr1_40026823_40026824_A	0	-
chr1	40027476	40027477	chr1_40027476_40027477_C	0	-
chr1	40027477	40027478	chr1_40027477_40027478_A	0	-
chr1	40027480	40027481	chr1_40027480_40027481_A	0	-
chr1	40027481	40027482	chr1_40027481_40027482_G	0	-
chr1	40027482	40027483	chr1_40027482_40027483_T	0	-
chr1	40028112	40028113	chr1_40028112_40028113_A	0	-
chr1	40029436	40029437	chr1_40029436_40029437_A	0	-
chr1	40029612	40029613	chr1_40029612_40029613_A	0	-
chr1	40029618	40029619	chr1_40029618_40029619_A	0	-
chr1	40029619	40029620	chr1_40029619_40029620_G	0	-
chr1	40029620	40029621	chr1_40029620_40029621_T	0	-
chr1	40029624	40029625	chr1_40029624_40029625_A	0	-
chr1	40029625	40029626	chr1_40029625_40029626_A	0	-
chr1	40030237	40030238	chr1_40030237_40030238_A	0	-
chr1	40030241	40030242	chr1_40030241_40030242_A	0	-
chr1	40030244	40030245	chr1_40030244_40030245_C	0	-
chr1	40030245	40030246	chr1_40030245_40030246_T	0	-
chr1	40030476	40030477	chr1_40030476_40030477_A	0	-
chr1	40030477	40030478	chr1_40030477_40030478_A	0	-
[truncated: 57,360 more rows]

## Sheet: Match+Insertion
Chromosome	Start	Stop	ID	Score	Strand
chr1	101491051	101491052	chr1_101491051_101491052_G	0	-
chr1	10239446	10239447	chr1_10239446_10239447_A	0	+
chr1	10511396	10511397	chr1_10511396_10511397_A	0	+
chr1	10523293	10523294	chr1_10523293_10523294_T	0	-
chr1	10689560	10689561	chr1_10689560_10689561_A	0	+
chr1	109440070	109440071	chr1_109440070_109440071_A	0	+
chr1	109525439	109525440	chr1_109525439_109525440_A	0	-
chr1	109814874	109814875	chr1_109814874_109814875_A	0	+
chr1	109825383	109825384	chr1_109825383_109825384_T	0	-
chr1	109952671	109952672	chr1_109952671_109952672_A	0	-
chr1	109953736	109953737	chr1_109953736_109953737_A	0	-
chr1	110129320	110129321	chr1_110129320_110129321_C	0	+
chr1	110168262	110168263	chr1_110168262_110168263_A	0	+
chr1	110168755	110168756	chr1_110168755_110168756_T	0	+
chr1	110172395	110172396	chr1_110172395_110172396_A	0	+
chr1	110553796	110553797	chr1_110553796_110553797_A	0	+
chr1	110554957	110554958	chr1_110554957_110554958_A	0	+
chr1	110555488	110555489	chr1_110555488_110555489_C	0	+
chr1	110560542	110560543	chr1_110560542_110560543_A	0	+
chr1	11134087	11134088	chr1_11134087_11134088_A	0	-
chr1	11174532	11174533	chr1_11174532_11174533_G	0	-
chr1	11181449	11181450	chr1_11181449_11181450_A	0	-
chr1	11188210	11188211	chr1_11188210_11188211_A	0	-
chr1	111984038	111984039	chr1_111984038_111984039_C	0	-
chr1	111985407	111985408	chr1_111985407_111985408_A	0	-
chr1	111999223	111999224	chr1_111999223_111999224_A	0	+
chr1	11272550	11272551	chr1_11272550_11272551_T	0	-
chr1	11301760	11301761	chr1_11301760_11301761_A	0	-
chr1	11308188	11308189	chr1_11308188_11308189_A	0	-
chr1	113124754	113124755	chr1_113124754_113124755_A	0	-
chr1	11318670	11318671	chr1_11318670_11318671_T	0	-
chr1	113234247	113234248	chr1_113234247_113234248_G	0	+
chr1	113236526	113236527	chr1_113236526_113236527_A	0	+
chr1	113638477	113638478	chr1_113638477_113638478_C	0	+
chr1	114514417	114514418	chr1_114514417_114514418_A	0	+
chr1	115262388	115262389	chr1_115262388_115262389_C	0	-
chr1	115275464	115275465	chr1_115275464_115275465_A	0	-
chr1	116931231	116931232	chr1_116931231_116931232_A	0	+
chr1	116946999	116947000	chr1_116946999_116947000_A	0	+
chr1	11722657	11722658	chr1_11722657_11722658_C	0	+
chr1	11734903	11734904	chr1_11734903_11734904_C	0	-
chr1	117620514	117620515	chr1_117620514_117620515_A	0	+
chr1	117632981	117632982	chr1_117632981_117632982_A	0	+
chr1	117633130	117633131	chr1_117633130_117633131_A	0	+
chr1	117635330	117635331	chr1_117635330_117635331_C	0	+
chr1	118494893	118494894	chr1_118494893_118494894_A	0	+
chr1	11854962	11854963	chr1_11854962_11854963_A	0	-
chr1	11855408	11855409	chr1_11855408_11855409_A	0	-
chr1	11883663	11883664	chr1_11883663_11883664_A	0	+
chr1	11888127	11888128	chr1_11888127_11888128_C	0	+
chr1	12026276	12026277	chr1_12026276_12026277_A	0	+
chr1	120282975	120282976	chr1_120282975_120282976_C	0	+
chr1	12041968	12041969	chr1_12041968_12041969_A	0	+
chr1	120459348	120459349	chr1_120459348_120459349_A	0	-
chr1	120465464	120465465	chr1_120465464_120465465_T	0	-
chr1	12058795	12058796	chr1_12058795_12058796_T	0	+
chr1	12061804	12061805	chr1_12061804_12061805_A	0	+
chr1	12402925	12402926	chr1_12402925_12402926_A	0	+
chr1	12402927	12402928	chr1_12402927_12402928_A	0	+
chr1	12402929	12402930	chr1_12402929_12402930_G	0	+
chr1	1249322	1249323	chr1_1249322_1249323_T	0	-
chr1	1254926	1254927	chr1_1254926_1254927_T	0	-
chr1	1255931	1255932	chr1_1255931_1255932_T	0	-
chr1	1266956	1266957	chr1_1266956_1266957_A	0	+
chr1	1417492	1417493	chr1_1417492_1417493_G	0	+
chr1	1421896	1421897	chr1_1421896_1421897_C	0	+
chr1	1423205	1423206	chr1_1423205_1423206_T	0	+
chr1	1423207	1423208	chr1_1423207_1423208_A	0	+
chr1	1425607	1425608	chr1_1425607_1425608_G	0	+
chr1	143156431	143156432	chr1_143156431_143156432_A	0	+
chr1	143157084	143157085	chr1_143157084_143157085_A	0	+
chr1	143188448	143188449	chr1_143188448_143188449_T	0	-
chr1	143194427	143194428	chr1_143194427_143194428_A	0	-
chr1	143399595	143399596	chr1_143399595_143399596_A	0	+
chr1	143713341	143713342	chr1_143713341_143713342_A	0	+
chr1	144159729	144159730	chr1_144159729_144159730_T	0	+
chr1	144160386	144160387	chr1_144160386_144160387_T	0	+
chr1	144161972	144161973	chr1_144161972_144161973_T	0	+
chr1	144162854	144162855	chr1_144162854_144162855_T	0	+
chr1	144163545	144163546	chr1_144163545_144163546_A	0	+
chr1	144163582	144163583	chr1_144163582_144163583_C	0	+
chr1	144163598	144163599	chr1_144163598_144163599_T	0	+
chr1	144164485	144164486	chr1_144164485_144164486_T	0	+
chr1	144165142	144165143	chr1_144165142_144165143_T	0	+
chr1	144166006	144166007	chr1_144166006_144166007_A	0	+
chr1	144166020	144166021	chr1_144166020_144166021_A	0	+
chr1	144167614	144167615	chr1_144167614_144167615_T	0	+
chr1	144168331	144168332	chr1_144168331_144168332_T	0	+
chr1	144169218	144169219	chr1_144169218_144169219_T	0	+
chr1	144169880	144169881	chr1_144169880_144169881_T	0	+
chr1	144171472	144171473	chr1_144171472_144171473_T	0	+
chr1	144172354	144172355	chr1_144172354_144172355_T	0	+
chr1	144173071	144173072	chr1_144173071_144173072_T	0	+
chr1	144175544	144175545	chr1_144175544_144175545_T	0	+
chr1	144175545	144175546	chr1_144175545_144175546_T	0	+
chr1	144177140	144177141	chr1_144177140_144177141_A	0	+
chr1	144177846	144177847	chr1_144177846_144177847_T	0	+
chr1	144178728	144178729	chr1_144178728_144178729_T	0	+
chr1	144179445	144179446	chr1_144179445_144179446_T	0	+
chr1	144181035	144181036	chr1_144181035_144181036_T	0	+
chr1	144181917	144181918	chr1_144181917_144181918_T	0	+
chr1	144182614	144182615	chr1_144182614_144182615_A	0	+
chr1	144182667	144182668	chr1_144182667_144182668_T	0	+
chr1	144183554	144183555	chr1_144183554_144183555_T	0	+
chr1	144183555	144183556	chr1_144183555_144183556_A	0	+
chr1	144184223	144184224	chr1_144184223_144184224_T	0	+
chr1	144186681	144186682	chr1_144186681_144186682_T	0	+
chr1	144187378	144187379	chr1_144187378_144187379_A	0	+
chr1	144187431	144187432	chr1_144187431_144187432_T	0	+
chr1	144188318	144188319	chr1_144188318_144188319_T	0	+
chr1	144188983	144188984	chr1_144188983_144188984_T	0	+
chr1	144191434	144191435	chr1_144191434_144191435_T	0	+
chr1	144191435	144191436	chr1_144191435_144191436_T	0	+
chr1	144192124	144192125	chr1_144192124_144192125_A	0	+
chr1	144192161	144192162	chr1_144192161_144192162_C	0	+
chr1	144192177	144192178	chr1_144192177_144192178_T	0	+
chr1	144193064	144193065	chr1_144193064_144193065_T	0	+
chr1	144193731	144193732	chr1_144193731_144193732_T	0	+
chr1	144196197	144196198	chr1_144196197_144196198_T	0	+
chr1	144196894	144196895	chr1_144196894_144196895_A	0	+
chr1	144196946	144196947	chr1_144196946_144196947_T	0	+
chr1	144196947	144196948	chr1_144196947_144196948_T	0	+
chr1	144197834	144197835	chr1_144197834_144197835_T	0	+
chr1	144200077	144200078	chr1_144200077_144200078_T	0	+
chr1	144200959	144200960	chr1_144200959_144200960_T	0	+
chr1	144201676	144201677	chr1_144201676_144201677_T	0	+
chr1	144202540	144202541	chr1_144202540_144202541_A	0	+
chr1	144203270	144203271	chr1_144203270_144203271_T	0	+
chr1	144204151	144204152	chr1_144204151_144204152_T	0	+
chr1	144204152	144204153	chr1_144204152_144204153_T	0	+
chr1	144204843	144204844	chr1_144204843_144204844_A	0	+
chr1	144204880	144204881	chr1_144204880_144204881_C	0	+
chr1	144204896	144204897	chr1_144204896_144204897_T	0	+
chr1	144205783	144205784	chr1_144205783_144205784_T	0	+
chr1	144206448	144206449	chr1_144206448_144206449_T	0	+
chr1	144207326	144207327	chr1_144207326_144207327_A	0	+
chr1	144208914	144208915	chr1_144208914_144208915_T	0	+
chr1	144209631	144209632	chr1_144209631_144209632_T	0	+
chr1	144212099	144212100	chr1_144212099_144212100_T	0	+
chr1	144212816	144212817	chr1_144212816_144212817_T	0	+
chr1	144215282	144215283	chr1_144215282_144215283_T	0	+
chr1	144215999	144216000	chr1_144215999_144216000_T	0	+
chr1	144216877	144216878	chr1_144216877_144216878_A	0	+
chr1	144217583	144217584	chr1_144217583_144217584_T	0	+
chr1	144218465	144218466	chr1_144218465_144218466_T	0	+
chr1	144219191	144219192	chr1_144219191_144219192_C	0	+
chr1	144219206	144219207	chr1_144219206_144219207_T	0	+
chr1	144219207	144219208	chr1_144219207_144219208_T	0	+
chr1	144220094	144220095	chr1_144220094_144220095_T	0	+
chr1	144220759	144220760	chr1_144220759_144220760_T	0	+
chr1	144223232	144223233	chr1_144223232_144223233_T	0	+
chr1	144223974	144223975	chr1_144223974_144223975_T	0	+
chr1	144825324	144825325	chr1_144825324_144825325_T	0	+
chr1	144826192	144826193	chr1_144826192_144826193_G	0	+
chr1	144827785	144827786	chr1_144827785_144827786_T	0	+
chr1	144827786	144827787	chr1_144827786_144827787_T	0	+
chr1	145291750	145291751	chr1_145291750_145291751_A	0	+
chr1	145313305	145313306	chr1_145313305_145313306_T	0	+
chr1	145315757	145315758	chr1_145315757_145315758_T	0	+
chr1	145316430	145316431	chr1_145316430_145316431_A	0	+
chr1	145316467	145316468	chr1_145316467_145316468_C	0	+
chr1	145316482	145316483	chr1_145316482_145316483_T	0	+
chr1	145316483	145316484	chr1_145316483_145316484_T	0	+
chr1	145317368	145317369	chr1_145317368_145317369_A	0	+
chr1	145318893	145318894	chr1_145318893_145318894_G	0	+
chr1	145320477	145320478	chr1_145320477_145320478_T	0	+
chr1	145321148	145321149	chr1_145321148_145321149_A	0	+
chr1	145321185	145321186	chr1_145321185_145321186_C	0	+
chr1	145321200	145321201	chr1_145321200_145321201_T	0	+
chr1	145321201	145321202	chr1_145321201_145321202_T	0	+
chr1	145323599	145323600	chr1_145323599_145323600_A	0	+
chr1	145323611	145323612	chr1_145323611_145323612_G	0	+
chr1	145324319	145324320	chr1_145324319_145324320_T	0	+
chr1	145325201	145325202	chr1_145325201_145325202_T	0	+
chr1	145326808	145326809	chr1_145326808_145326809_A	0	+
chr1	145327357	145327358	chr1_145327357_145327358_A	0	+
chr1	145328341	145328342	chr1_145328341_145328342_T	0	+
chr1	145328342	145328343	chr1_145328342_145328343_A	0	+
chr1	145329050	145329051	chr1_145329050_145329051_T	0	+
chr1	145329932	145329933	chr1_145329932_145329933_T	0	+
chr1	145331541	145331542	chr1_145331541_145331542_T	0	+
chr1	145332194	145332195	chr1_145332194_145332195_T	0	+
chr1	145333050	145333051	chr1_145333050_145333051_A	0	+
chr1	145333768	145333769	chr1_145333768_145333769_T	0	+
chr1	145334650	145334651	chr1_145334650_145334651_T	0	+
chr1	145335344	145335345	chr1_145335344_145335345_C	0	+
chr1	145335359	145335360	chr1_145335359_145335360_T	0	+
chr1	145335360	145335361	chr1_145335360_145335361_T	0	+
chr1	145336900	145336901	chr1_145336900_145336901_T	0	+
chr1	145337777	145337778	chr1_145337777_145337778_T	0	+
chr1	145339369	145339370	chr1_145339369_145339370_T	0	+
chr1	145339370	145339371	chr1_145339370_145339371_T	0	+
chr1	145340079	145340080	chr1_145340079_145340080_T	0	+
chr1	145340080	145340081	chr1_145340080_145340081_T	0	+
chr1	145340967	145340968	chr1_145340967_145340968_T	0	+
chr1	145341620	145341621	chr1_145341620_145341621_T	0	+
chr1	145342476	145342477	chr1_145342476_145342477_A	0	+
chr1	145342488	145342489	chr1_145342488_145342489_G	0	+
chr1	145342497	145342498	chr1_145342497_145342498_T	0	+
chr1	145344094	145344095	chr1_145344094_145344095_T	0	+
chr1	145344803	145344804	chr1_145344803_145344804_T	0	+
chr1	145344804	145344805	chr1_145344804_145344805_T	0	+
chr1	145345691	145345692	chr1_145345691_145345692_T	0	+
chr1	145346344	145346345	chr1_145346344_145346345_T	0	+
chr1	145347200	145347201	chr1_145347200_145347201_A	0	+
chr1	145347936	145347937	chr1_145347936_145347937_T	0	+
chr1	145348818	145348819	chr1_145348818_145348819_T	0	+
chr1	145349533	145349534	chr1_145349533_145349534_T	0	+
chr1	145349534	145349535	chr1_145349534_145349535_T	0	+
chr1	145350421	145350422	chr1_145350421_145350422_T	0	+
chr1	145351074	145351075	chr1_145351074_145351075_T	0	+
chr1	145351942	145351943	chr1_145351942_145351943_G	0	+
chr1	145353537	145353538	chr1_145353537_145353538_T	0	+
chr1	145353538	145353539	chr1_145353538_145353539_T	0	+
chr1	145354213	145354214	chr1_145354213_145354214_A	0	+
chr1	145354250	145354251	chr1_145354250_145354251_C	0	+
chr1	145354266	145354267	chr1_145354266_145354267_T	0	+
chr1	145355153	145355154	chr1_145355153_145355154_T	0	+
chr1	145355808	145355809	chr1_145355808_145355809_T	0	+
chr1	145356676	145356677	chr1_145356676_145356677_G	0	+
chr1	145356685	145356686	chr1_145356685_145356686_T	0	+
chr1	145358269	145358270	chr1_145358269_145358270_T	0	+
chr1	145358270	145358271	chr1_145358270_145358271_T	0	+
chr1	145358970	145358971	chr1_145358970_145358971_C	0	+
chr1	145358985	145358986	chr1_145358985_145358986_T	0	+
chr1	145358986	145358987	chr1_145358986_145358987_T	0	+
chr1	145359873	145359874	chr1_145359873_145359874_T	0	+
chr1	145360526	145360527	chr1_145360526_145360527_T	0	+
chr1	145361411	145361412	chr1_145361411_145361412_A	0	+
chr1	145362068	145362069	chr1_145362068_145362069_T	0	+
chr1	145362936	145362937	chr1_145362936_145362937_G	0	+
chr1	145363650	145363651	chr1_145363650_145363651_T	0	+
chr1	145364532	145364533	chr1_145364532_145364533_T	0	+
chr1	145365242	145365243	chr1_145365242_145365243_C	0	+
chr1	145365258	145365259	chr1_145365258_145365259_T	0	+
chr1	145365259	145365260	chr1_145365259_145365260_G	0	+
chr1	145366145	145366146	chr1_145366145_145366146_T	0	+
chr1	145366798	145366799	chr1_145366798_145366799_T	0	+
chr1	145367680	145367681	chr1_145367680_145367681_T	0	+
chr1	145508890	145508891	chr1_145508890_145508891_A	0	+
chr1	145803408	145803409	chr1_145803408_145803409_A	0	-
chr1	145884833	145884834	chr1_145884833_145884834_A	0	+
chr1	1459615	1459616	chr1_1459615_1459616_A	0	+
chr1	146035179	146035180	chr1_146035179_146035180_T	0	-
chr1	146036057	146036058	chr1_146036057_146036058_T	0	-
chr1	146037649	146037650	chr1_146037649_146037650_T	0	-
chr1	146038302	146038303	chr1_146038302_146038303_T	0	-
chr1	146054554	146054555	chr1_146054554_146054555_A	0	-
chr1	146420877	146420878	chr1_146420877_146420878_T	0	+
chr1	146421530	146421531	chr1_146421530_146421531_T	0	+
chr1	146424016	146424017	chr1_146424016_146424017_T	0	+
chr1	146425643	146425644	chr1_146425643_146425644_C	0	+
chr1	146426295	146426296	chr1_146426295_146426296_T	0	+
chr1	146428781	146428782	chr1_146428781_146428782_T	0	+
chr1	146430407	146430408	chr1_146430407_146430408_T	0	+
chr1	146431060	146431061	chr1_146431060_146431061_T	0	+
chr1	146433546	146433547	chr1_146433546_146433547_T	0	+
chr1	146435172	146435173	chr1_146435172_146435173_T	0	+
chr1	146435176	146435177	chr1_146435176_146435177_A	0	+
chr1	146435825	146435826	chr1_146435825_146435826_T	0	+
chr1	146438311	146438312	chr1_146438311_146438312_T	0	+
chr1	146439937	146439938	chr1_146439937_146439938_T	0	+
chr1	146439938	146439939	chr1_146439938_146439939_C	0	+
chr1	146439941	146439942	chr1_146439941_146439942_A	0	+
chr1	146441472	146441473	chr1_146441472_146441473_T	0	+
chr1	146441476	146441477	chr1_146441476_146441477_A	0	+
chr1	146442125	146442126	chr1_146442125_146442126_T	0	+
chr1	146443012	146443013	chr1_146443012_146443013_T	0	+
chr1	146443013	146443014	chr1_146443013_146443014_C	0	+
chr1	146443014	146443015	chr1_146443014_146443015_A	0	+
chr1	146443016	146443017	chr1_146443016_146443017_A	0	+
chr1	146443664	146443665	chr1_146443664_146443665_T	0	+
chr1	146446152	146446153	chr1_146446152_146446153_T	0	+
chr1	146446805	146446806	chr1_146446805_146446806_T	0	+
chr1	146447692	146447693	chr1_146447692_146447693_T	0	+
chr1	146450830	146450831	chr1_146450830_146450831_T	0	+
chr1	146450831	146450832	chr1_146450831_146450832_T	0	+
chr1	146450832	146450833	chr1_146450832_146450833_A	0	+
chr1	146452457	146452458	chr1_146452457_146452458_T	0	+
chr1	146452459	146452460	chr1_146452459_146452460_A	0	+
chr1	146453109	146453110	chr1_146453109_146453110_T	0	+
chr1	146455590	146455591	chr1_146455590_146455591_T	0	+
chr1	146455591	146455592	chr1_146455591_146455592_T	0	+
chr1	146457217	146457218	chr1_146457217_146457218_T	0	+
chr1	146457218	146457219	chr1_146457218_146457219_C	0	+
chr1	146457869	146457870	chr1_146457869_146457870_T	0	+
chr1	146460351	146460352	chr1_146460351_146460352_T	0	+
chr1	146461977	146461978	chr1_146461977_146461978_T	0	+
chr1	146461981	146461982	chr1_146461981_146461982_A	0	+
chr1	146465117	146465118	chr1_146465117_146465118_T	0	+
chr1	146728163	146728164	chr1_146728163_146728164_C	0	+
chr1	147426532	147426533	chr1_147426532_147426533_A	0	+
chr1	147576960	147576961	chr1_147576960_147576961_T	0	-
chr1	147576961	147576962	chr1_147576961_147576962_T	0	-
chr1	147577838	147577839	chr1_147577838_147577839_T	0	-
chr1	147580079	147580080	chr1_147580079_147580080_T	0	-
chr1	148005543	148005544	chr1_148005543_148005544_T	0	-
chr1	148005544	148005545	chr1_148005544_148005545_T	0	-
chr1	148006425	148006426	chr1_148006425_148006426_T	0	-
chr1	148007131	148007132	chr1_148007131_148007132_G	0	-
chr1	148007999	148008000	chr1_148007999_148008000_T	0	-
chr1	148008656	148008657	chr1_148008656_148008657_T	0	-
chr1	148009543	148009544	chr1_148009543_148009544_T	0	-
chr1	148010196	148010197	chr1_148010196_148010197_T	0	-
chr1	148011083	148011084	chr1_148011083_148011084_T	0	-
chr1	148011820	148011821	chr1_148011820_148011821_T	0	-
chr1	148011821	148011822	chr1_148011821_148011822_T	0	-
chr1	148012702	148012703	chr1_148012702_148012703_T	0	-
chr1	148013412	148013413	chr1_148013412_148013413_G	0	-
chr1	148014280	148014281	chr1_148014280_148014281_T	0	-
chr1	148014937	148014938	chr1_148014937_148014938_T	0	-
chr1	148252870	148252871	chr1_148252870_148252871_T	0	-
chr1	148255340	148255341	chr1_148255340_148255341_T	0	-
chr1	148256005	148256006	chr1_148256005_148256006_T	0	-
chr1	148256908	148256909	chr1_148256908_148256909_C	0	-
chr1	148257634	148257635	chr1_148257634_148257635_T	0	-
chr1	148258516	148258517	chr1_148258516_148258517_T	0	-
chr1	148260104	148260105	chr1_148260104_148260105_T	0	-
chr1	148260769	148260770	chr1_148260769_148260770_T	0	-
chr1	148261656	148261657	chr1_148261656_148261657_T	0	-
chr1	148262398	148262399	chr1_148262398_148262399_T	0	-
chr1	148263280	148263281	chr1_148263280_148263281_T	0	-
chr1	148264864	148264865	chr1_148264864_148264865_T	0	-
chr1	148265529	148265530	chr1_148265529_148265530_T	0	-
chr1	148266416	148266417	chr1_148266416_148266417_T	0	-
chr1	148266417	148266418	chr1_148266417_148266418_T	0	-
chr1	148267158	148267159	chr1_148267158_148267159_T	0	-
chr1	148268040	148268041	chr1_148268040_148268041_T	0	-
chr1	148269636	148269637	chr1_148269636_148269637_T	0	-
chr1	148270301	148270302	chr1_148270301_148270302_T	0	-
chr1	148271188	148271189	chr1_148271188_148271189_T	0	-
chr1	148271204	148271205	chr1_148271204_148271205_C	0	-
chr1	148271932	148271933	chr1_148271932_148271933_T	0	-
chr1	148274408	148274409	chr1_148274408_148274409_T	0	-
chr1	148275065	148275066	chr1_148275065_148275066_T	0	-
chr1	148275952	148275953	chr1_148275952_148275953_T	0	-
chr1	148275953	148275954	chr1_148275953_148275954_T	0	-
chr1	148276696	148276697	chr1_148276696_148276697_T	0	-
chr1	148277578	148277579	chr1_148277578_148277579_T	0	-
chr1	148279170	148279171	chr1_148279170_148279171_T	0	-
chr1	148279887	148279888	chr1_148279887_148279888_T	0	-
chr1	148283080	148283081	chr1_148283080_148283081_T	0	-
chr1	148283081	148283082	chr1_148283081_148283082_T	0	-
chr1	148286273	148286274	chr1_148286273_148286274_T	0	-
chr1	148288749	148288750	chr1_148288749_148288750_T	0	-
chr1	148289414	148289415	chr1_148289414_148289415_T	0	-
chr1	148290301	148290302	chr1_148290301_148290302_T	0	-
chr1	148290302	148290303	chr1_148290302_148290303_T	0	-
chr1	148291043	148291044	chr1_148291043_148291044_T	0	-
chr1	148294184	148294185	chr1_148294184_148294185_T	0	-
chr1	148295071	148295072	chr1_148295071_148295072_T	0	-
chr1	148295072	148295073	chr1_148295072_148295073_T	0	-
chr1	148295087	148295088	chr1_148295087_148295088_C	0	-
chr1	148295813	148295814	chr1_148295813_148295814_T	0	-
chr1	148299841	148299842	chr1_148299841_148299842_T	0	-
chr1	148299842	148299843	chr1_148299842_148299843_T	0	-
chr1	148299857	148299858	chr1_148299857_148299858_C	0	-
chr1	148300583	148300584	chr1_148300583_148300584_T	0	-
chr1	148300584	148300585	chr1_148300584_148300585_T	0	-
chr1	148301465	148301466	chr1_148301465_148301466_T	0	-
chr1	148303049	148303050	chr1_148303049_148303050_T	0	-
chr1	148304601	148304602	chr1_148304601_148304602_T	0	-
chr1	148304617	148304618	chr1_148304617_148304618_C	0	-
chr1	148305343	148305344	chr1_148305343_148305344_T	0	-
chr1	148307819	148307820	chr1_148307819_148307820_T	0	-
chr1	148309375	148309376	chr1_148309375_148309376_T	0	-
chr1	148309376	148309377	chr1_148309376_148309377_T	0	-
chr1	148309391	148309392	chr1_148309391_148309392_C	0	-
chr1	148309428	148309429	chr1_148309428_148309429_A	0	-
chr1	148310117	148310118	chr1_148310117_148310118_T	0	-
chr1	148312585	148312586	chr1_148312585_148312586_T	0	-
chr1	148313250	148313251	chr1_148313250_148313251_T	0	-
chr1	148314137	148314138	chr1_148314137_148314138_T	0	-
chr1	148314138	148314139	chr1_148314138_148314139_T	0	-
chr1	148314190	148314191	chr1_148314190_148314191_A	0	-
chr1	148314879	148314880	chr1_148314879_148314880_T	0	-
chr1	148318022	148318023	chr1_148318022_148318023_T	0	-
chr1	148318909	148318910	chr1_148318909_148318910_T	0	-
chr1	148318910	148318911	chr1_148318910_148318911_T	0	-
chr1	148318925	148318926	chr1_148318925_148318926_C	0	-
chr1	148318962	148318963	chr1_148318962_148318963_A	0	-
chr1	148319651	148319652	chr1_148319651_148319652_T	0	-
chr1	148321227	148321228	chr1_148321227_148321228_A	0	-
chr1	148321241	148321242	chr1_148321241_148321242_A	0	-
chr1	148322770	148322771	chr1_148322770_148322771_T	0	-
chr1	148323657	148323658	chr1_148323657_148323658_T	0	-
chr1	148323658	148323659	chr1_148323658_148323659_T	0	-
chr1	148323673	148323674	chr1_148323673_148323674_C	0	-
chr1	148323710	148323711	chr1_148323710_148323711_A	0	-
chr1	148324399	148324400	chr1_148324399_148324400_T	0	-
chr1	148325281	148325282	chr1_148325281_148325282_T	0	-
chr1	148326875	148326876	chr1_148326875_148326876_T	0	-
chr1	148327532	148327533	chr1_148327532_148327533_T	0	-
chr1	148590519	148590520	chr1_148590519_148590520_T	0	+
chr1	148592762	148592763	chr1_148592762_148592763_T	0	+
chr1	148593644	148593645	chr1_148593644_148593645_T	0	+
chr1	148752567	148752568	chr1_148752567_148752568_T	0	+
chr1	148755688	148755689	chr1_148755688_148755689_T	0	+
chr1	149899219	149899220	chr1_149899219_149899220_C	0	-
chr1	150040661	150040662	chr1_150040661_150040662_T	0	+
chr1	150266716	150266717	chr1_150266716_150266717_C	0	+
chr1	150266728	150266729	chr1_150266728_150266729_C	0	+
chr1	150550991	150550992	chr1_150550991_150550992_G	0	-
chr1	150923797	150923798	chr1_150923797_150923798_C	0	+
chr1	150939712	150939713	chr1_150939712_150939713_A	0	-
chr1	150946337	150946338	chr1_150946337_150946338_A	0	+
chr1	150946339	150946340	chr1_150946339_150946340_A	0	+
chr1	151262883	151262884	chr1_151262883_151262884_C	0	+
chr1	152005328	152005329	chr1_152005328_152005329_A	0	-
chr1	153507338	153507339	chr1_153507338_153507339_A	0	-
chr1	153507857	153507858	chr1_153507857_153507858_T	0	-
chr1	153631896	153631897	chr1_153631896_153631897_T	0	+
chr1	153637839	153637840	chr1_153637839_153637840_A	0	-
chr1	153721126	153721127	chr1_153721126_153721127_T	0	+
chr1	153736263	153736264	chr1_153736263_153736264_T	0	+
chr1	153736270	153736271	chr1_153736270_153736271_T	0	+
chr1	153745073	153745074	chr1_153745073_153745074_T	0	+
chr1	153964010	153964011	chr1_153964010_153964011_A	0	+
chr1	154148754	154148755	chr1_154148754_154148755_T	0	-
chr1	154223493	154223494	chr1_154223493_154223494_A	0	+
chr1	154227593	154227594	chr1_154227593_154227594_T	0	+
chr1	154228131	154228132	chr1_154228131_154228132_T	0	+
chr1	154232386	154232387	chr1_154232386_154232387_A	0	+
chr1	154316331	154316332	chr1_154316331_154316332_A	0	+
chr1	154316846	154316847	chr1_154316846_154316847_A	0	+
chr1	154557862	154557863	chr1_154557862_154557863_T	0	-
chr1	154561971	154561972	chr1_154561971_154561972_C	0	-
chr1	154561972	154561973	chr1_154561972_154561973_C	0	-
chr1	154938285	154938286	chr1_154938285_154938286_T	0	-
chr1	154965164	154965165	chr1_154965164_154965165_T	0	+
chr1	155031156	155031157	chr1_155031156_155031157_T	0	+
chr1	155182435	155182436	chr1_155182435_155182436_A	0	+
chr1	155184975	155184976	chr1_155184975_155184976_C	0	-
chr1	155234588	155234589	chr1_155234588_155234589_A	0	-
chr1	155235767	155235768	chr1_155235767_155235768_T	0	-
chr1	155581310	155581311	chr1_155581310_155581311_T	0	+
chr1	155658035	155658036	chr1_155658035_155658036_T	0	-
chr1	155697376	155697377	chr1_155697376_155697377_C	0	+
chr1	155701113	155701114	chr1_155701113_155701114_A	0	+
chr1	155707920	155707921	chr1_155707920_155707921_A	0	+
chr1	155722408	155722409	chr1_155722408_155722409_A	0	-
chr1	155727141	155727142	chr1_155727141_155727142_T	0	-
chr1	155886531	155886532	chr1_155886531_155886532_A	0	-
chr1	155891339	155891340	chr1_155891339_155891340_C	0	-
chr1	155891342	155891343	chr1_155891342_155891343_T	0	-
chr1	155893503	155893504	chr1_155893503_155893504_T	0	-
chr1	155899187	155899188	chr1_155899187_155899188_A	0	-
chr1	156006940	156006941	chr1_156006940_156006941_A	0	-
chr1	156011485	156011486	chr1_156011485_156011486_C	0	-
chr1	156012736	156012737	chr1_156012736_156012737_T	0	-
chr1	156108841	156108842	chr1_156108841_156108842_A	0	+
chr1	156216573	156216574	chr1_156216573_156216574_A	0	-
chr1	156220832	156220833	chr1_156220832_156220833_T	0	-
chr1	156222892	156222893	chr1_156222892_156222893_A	0	-
chr1	156236190	156236191	chr1_156236190_156236191_T	0	-
chr1	1563027	1563028	chr1_1563027_1563028_C	0	+
chr1	156530836	156530837	chr1_156530836_156530837_T	0	-
chr1	156563168	156563169	chr1_156563168_156563169_G	0	+
chr1	156563652	156563653	chr1_156563652_156563653_T	0	+
chr1	156643029	156643030	chr1_156643029_156643030_C	0	-
chr1	156708620	156708621	chr1_156708620_156708621_A	0	-
chr1	15753615	15753616	chr1_15753615_15753616_T	0	+
chr1	158637889	158637890	chr1_158637889_158637890_A	0	-
chr1	158644495	158644496	chr1_158644495_158644496_C	0	-
chr1	15956782	15956783	chr1_15956782_15956783_A	0	+
chr1	15976181	15976182	chr1_15976181_15976182_A	0	+
chr1	15976187	15976188	chr1_15976187_15976188_A	0	+
chr1	160190381	160190382	chr1_160190381_160190382_T	0	-
chr1	160231170	160231171	chr1_160231170_160231171_A	0	-
chr1	160252935	160252936	chr1_160252935_160252936_A	0	-
chr1	160277060	160277061	chr1_160277060_160277061_C	0	-
chr1	16045007	16045008	chr1_16045007_16045008_C	0	+
chr1	16054538	16054539	chr1_16054538_16054539_C	0	+
chr1	16058355	16058356	chr1_16058355_16058356_C	0	+
chr1	161012056	161012057	chr1_161012056_161012057_T	0	-
chr1	161088898	161088899	chr1_161088898_161088899_A	0	+
chr1	161133921	161133922	chr1_161133921_161133922_A	0	+
chr1	161133928	161133929	chr1_161133928_161133929_G	0	+
chr1	161134299	161134300	chr1_161134299_161134300_T	0	+
chr1	161183046	161183047	chr1_161183046_161183047_T	0	+
chr1	161183913	161183914	chr1_161183913_161183914_A	0	+
chr1	161197028	161197029	chr1_161197028_161197029_T	0	+
chr1	162740073	162740074	chr1_162740073_162740074_C	0	+
chr1	163310129	163310130	chr1_163310129_163310130_A	0	+
chr1	16462295	16462296	chr1_16462295_16462296_A	0	-
chr1	1685113	1685114	chr1_1685113_1685114_C	0	-
chr1	1686170	1686171	chr1_1686170_1686171_T	0	-
chr1	1688152	1688153	chr1_1688152_1688153_A	0	-
chr1	16891445	16891446	chr1_16891445_16891446_T	0	-
chr1	16892986	16892987	chr1_16892986_16892987_T	0	-
chr1	169100495	169100496	chr1_169100495_169100496_A	0	+
chr1	16918844	16918845	chr1_16918844_16918845_A	0	-
chr1	169286	169287	chr1_169286_169287_A	0	-
chr1	16969661	16969662	chr1_16969661_16969662_A	0	-
chr1	171752851	171752852	chr1_171752851_171752852_C	0	+
chr1	173833237	173833238	chr1_173833237_173833238_A	0	-
chr1	173833460	173833461	chr1_173833460_173833461_A	0	-
chr1	173833466	173833467	chr1_173833466_173833467_A	0	-
chr1	173833867	173833868	chr1_173833867_173833868_T	0	-
chr1	173834439	173834440	chr1_173834439_173834440_A	0	-
chr1	173834441	173834442	chr1_173834441_173834442_A	0	-
chr1	173834442	173834443	chr1_173834442_173834443_T	0	-
chr1	173834711	173834712	chr1_173834711_173834712_T	0	-
chr1	173835367	173835368	chr1_173835367_173835368_G	0	-
chr1	173835368	173835369	chr1_173835368_173835369_T	0	-
chr1	173835369	173835370	chr1_173835369_173835370_C	0	-
chr1	173835382	173835383	chr1_173835382_173835383_A	0	-
chr1	173835726	173835727	chr1_173835726_173835727_A	0	-
chr1	173835964	173835965	chr1_173835964_173835965_A	0	-
chr1	173835966	173835967	chr1_173835966_173835967_T	0	-
chr1	173836205	173836206	chr1_173836205_173836206_T	0	-
chr1	173910545	173910546	chr1_173910545_173910546_A	0	-
chr1	173952068	173952069	chr1_173952068_173952069_A	0	-
chr1	17735705	17735706	chr1_17735705_17735706_T	0	-
chr1	179086674	179086675	chr1_179086674_179086675_A	0	-
chr1	182811660	182811661	chr1_182811660_182811661_C	0	+
chr1	182812404	182812405	chr1_182812404_182812405_T	0	+
chr1	182824683	182824684	chr1_182824683_182824684_T	0	+
chr1	182825641	182825642	chr1_182825641_182825642_A	0	+
chr1	182827517	182827518	chr1_182827517_182827518_A	0	+
chr1	183498003	183498004	chr1_183498003_183498004_A	0	+
chr1	183519858	183519859	chr1_183519858_183519859_A	0	+
chr1	186368054	186368055	chr1_186368054_186368055_T	0	+
chr1	192780508	192780509	chr1_192780508_192780509_A	0	+
chr1	192992199	192992200	chr1_192992199_192992200_A	0	-
chr1	19419435	19419436	chr1_19419435_19419436_A	0	-
chr1	19427091	19427092	chr1_19427091_19427092_A	0	-
chr1	19431712	19431713	chr1_19431712_19431713_A	0	-
chr1	19440632	19440633	chr1_19440632_19440633_A	0	-
chr1	19449588	19449589	chr1_19449588_19449589_A	0	-
chr1	19453179	19453180	chr1_19453179_19453180_T	0	-
chr1	19454262	19454263	chr1_19454262_19454263_A	0	-
chr1	19454267	19454268	chr1_19454267_19454268_A	0	-
chr1	19467455	19467456	chr1_19467455_19467456_A	0	-
chr1	19488409	19488410	chr1_19488409_19488410_A	0	-
chr1	19497409	19497410	chr1_19497409_19497410_T	0	-
chr1	19525203	19525204	chr1_19525203_19525204_A	0	-
chr1	19528333	19528334	chr1_19528333_19528334_G	0	-
chr1	19565382	19565383	chr1_19565382_19565383_T	0	-
chr1	19584303	19584304	chr1_19584303_19584304_C	0	+
chr1	197056123	197056124	chr1_197056123_197056124_A	0	-
chr1	197093491	197093492	chr1_197093491_197093492_A	0	-
chr1	197097819	197097820	chr1_197097819_197097820_A	0	-
chr1	198701403	198701404	chr1_198701403_198701404_T	0	+
chr1	200378874	200378875	chr1_200378874_200378875_C	0	-
chr1	200623934	200623935	chr1_200623934_200623935_A	0	-
chr1	201824236	201824237	chr1_201824236_201824237_T	0	+
chr1	201824828	201824829	chr1_201824828_201824829_A	0	+
chr1	201827959	201827960	chr1_201827959_201827960_T	0	+
chr1	201843935	201843936	chr1_201843935_201843936_T	0	+
chr1	202301116	202301117	chr1_202301116_202301117_T	0	-
chr1	202403750	202403751	chr1_202403750_202403751_A	0	+
chr1	202827332	202827333	chr1_202827332_202827333_A	0	-
chr1	203771664	203771665	chr1_203771664_203771665_A	0	+
chr1	203831306	203831307	chr1_203831306_203831307_T	0	+
chr1	204396904	204396905	chr1_204396904_204396905_C	0	-
chr1	204400938	204400939	chr1_204400938_204400939_A	0	-
chr1	204401555	204401556	chr1_204401555_204401556_T	0	-
chr1	204401565	204401566	chr1_204401565_204401566_T	0	-
chr1	204402588	204402589	chr1_204402588_204402589_A	0	-
chr1	204403108	204403109	chr1_204403108_204403109_G	0	-
chr1	204423942	204423943	chr1_204423942_204423943_T	0	-
chr1	204507218	204507219	chr1_204507218_204507219_T	0	+
chr1	205277388	205277389	chr1_205277388_205277389_C	0	-
chr1	205768245	205768246	chr1_205768245_205768246_A	0	-
chr1	206578580	206578581	chr1_206578580_206578581_T	0	+
chr1	206773000	206773001	chr1_206773000_206773001_A	0	-
chr1	206775839	206775840	chr1_206775839_206775840_A	0	-
chr1	207223095	207223096	chr1_207223095_207223096_A	0	-
chr1	207244731	207244732	chr1_207244731_207244732_A	0	+
chr1	207495639	207495640	chr1_207495639_207495640_G	0	+
chr1	207495699	207495700	chr1_207495699_207495700_C	0	+
chr1	209796154	209796155	chr1_209796154_209796155_A	0	-
chr1	20980289	20980290	chr1_20980289_20980290_C	0	-
chr1	21094179	21094180	chr1_21094179_21094180_T	0	-
chr1	21191240	21191241	chr1_21191240_21191241_A	0	-
chr1	211923417	211923418	chr1_211923417_211923418_A	0	-
chr1	212148750	212148751	chr1_212148750_212148751_C	0	-
chr1	212148763	212148764	chr1_212148763_212148764_C	0	-
chr1	214832169	214832170	chr1_214832169_214832170_A	0	+
chr1	215793369	215793370	chr1_215793369_215793370_A	0	+
chr1	220152089	220152090	chr1_220152089_220152090_A	0	-
chr1	220287626	220287627	chr1_220287626_220287627_A	0	+
chr1	22030152	22030153	chr1_22030152_22030153_C	0	-
chr1	220311232	220311233	chr1_220311232_220311233_T	0	+
chr1	22032752	22032753	chr1_22032752_22032753_A	0	-
chr1	220357532	220357533	chr1_220357532_220357533_T	0	-
chr1	22156115	22156116	chr1_22156115_22156116_T	0	-
chr1	22168899	22168900	chr1_22168899_22168900_A	0	-
chr1	22174023	22174024	chr1_22174023_22174024_C	0	-
chr1	22174607	22174608	chr1_22174607_22174608_T	0	-
chr1	222751015	222751016	chr1_222751015_222751016_A	0	-
chr1	222838646	222838647	chr1_222838646_222838647_C	0	+
chr1	222884935	222884936	chr1_222884935_222884936_A	0	-
chr1	224419028	224419029	chr1_224419028_224419029_A	0	-
chr1	224492572	224492573	chr1_224492572_224492573_A	0	-
chr1	225594575	225594576	chr1_225594575_225594576_C	0	-
chr1	226550883	226550884	chr1_226550883_226550884_T	0	-
chr1	228285529	228285530	chr1_228285529_228285530_C	0	+
chr1	228333709	228333710	chr1_228333709_228333710_A	0	+
chr1	228336337	228336338	chr1_228336337_228336338_C	0	+
chr1	228403243	228403244	chr1_228403243_228403244_T	0	+
chr1	228474450	228474451	chr1_228474450_228474451_C	0	+
chr1	228476291	228476292	chr1_228476291_228476292_T	0	+
chr1	228487554	228487555	chr1_228487554_228487555_A	0	+
chr1	228495782	228495783	chr1_228495782_228495783_A	0	+
chr1	228521257	228521258	chr1_228521257_228521258_T	0	+
chr1	228522191	228522192	chr1_228522191_228522192_T	0	+
chr1	228558345	228558346	chr1_228558345_228558346_C	0	+
chr1	228558352	228558353	chr1_228558352_228558353_A	0	+
chr1	2289063	2289064	chr1_2289063_2289064_A	0	-
chr1	229641929	229641930	chr1_229641929_229641930_A	0	-
chr1	229654197	229654198	chr1_229654197_229654198_A	0	-
chr1	229683470	229683471	chr1_229683470_229683471_C	0	-
chr1	230372377	230372378	chr1_230372377_230372378_A	0	+
chr1	231067238	231067239	chr1_231067238_231067239_A	0	-
chr1	231664963	231664964	chr1_231664963_231664964_A	0	+
chr1	234743635	234743636	chr1_234743635_234743636_T	0	-
chr1	235490087	235490088	chr1_235490087_235490088_A	0	-
chr1	235490311	235490312	chr1_235490311_235490312_T	0	-
chr1	235937322	235937323	chr1_235937322_235937323_A	0	-
chr1	236973778	236973779	chr1_236973778_236973779_A	0	+
chr1	237026729	237026730	chr1_237026729_237026730_T	0	+
chr1	237037980	237037981	chr1_237037980_237037981_T	0	+
chr1	23847592	23847593	chr1_23847592_23847593_A	0	-
chr1	23884940	23884941	chr1_23884940_23884941_G	0	-
chr1	24022262	24022263	chr1_24022262_24022263_T	0	+
chr1	24022807	24022808	chr1_24022807_24022808_A	0	+
chr1	24078862	24078863	chr1_24078862_24078863_A	0	+
chr1	24125522	24125523	chr1_24125522_24125523_A	0	-
chr1	24143290	24143291	chr1_24143290_24143291_A	0	-
chr1	242012000	242012001	chr1_242012000_242012001_T	0	+
chr1	242012001	242012002	chr1_242012001_242012002_G	0	+
chr1	244587393	244587394	chr1_244587393_244587394_T	0	-
chr1	245019483	245019484	chr1_245019483_245019484_A	0	-
chr1	245021128	245021129	chr1_245021128_245021129_A	0	-
chr1	245021577	245021578	chr1_245021577_245021578_A	0	-
chr1	2452778	2452779	chr1_2452778_2452779_C	0	-
chr1	2452788	2452789	chr1_2452788_2452789_C	0	-
chr1	247068992	247068993	chr1_247068992_247068993_A	0	-
chr1	247076731	247076732	chr1_247076731_247076732_A	0	-
chr1	247471926	247471927	chr1_247471926_247471927_A	0	-
chr1	24979382	24979383	chr1_24979382_24979383_T	0	+
chr1	24987180	24987181	chr1_24987180_24987181_A	0	+
chr1	2520341	2520342	chr1_2520341_2520342_T	0	+
chr1	25570737	25570738	chr1_25570737_25570738_A	0	-
chr1	25812082	25812083	chr1_25812082_25812083_A	0	+
chr1	26137919	26137920	chr1_26137919_26137920_T	0	+
chr1	26152771	26152772	chr1_26152771_26152772_A	0	+
chr1	26230329	26230330	chr1_26230329_26230330_T	0	-
chr1	26586045	26586046	chr1_26586045_26586046_A	0	+
chr1	26610997	26610998	chr1_26610997_26610998_C	0	-
chr1	26800538	26800539	chr1_26800538_26800539_T	0	+
chr1	26873651	26873652	chr1_26873651_26873652_T	0	+
chr1	26898638	26898639	chr1_26898638_26898639_T	0	+
chr1	27087850	27087851	chr1_27087850_27087851_T	0	+
chr1	27087869	27087870	chr1_27087869_27087870_A	0	+
chr1	27094242	27094243	chr1_27094242_27094243_C	0	+
chr1	27215616	27215617	chr1_27215616_27215617_G	0	-
chr1	27272599	27272600	chr1_27272599_27272600_A	0	+
chr1	27631461	27631462	chr1_27631461_27631462_T	0	+
chr1	27657449	27657450	chr1_27657449_27657450_C	0	+
chr1	27688382	27688383	chr1_27688382_27688383_A	0	-
chr1	28060500	28060501	chr1_28060500_28060501_A	0	+
chr1	28218788	28218789	chr1_28218788_28218789_A	0	-
chr1	28834611	28834612	chr1_28834611_28834612_A	0	+
chr1	28834615	28834616	chr1_28834615_28834616_A	0	+
chr1	28858648	28858649	chr1_28858648_28858649_A	0	+
chr1	28863231	28863232	chr1_28863231_28863232_T	0	+
chr1	28906493	28906494	chr1_28906493_28906494_G	0	-
chr1	28907184	28907185	chr1_28907184_28907185_G	0	-
chr1	28907185	28907186	chr1_28907185_28907186_T	0	-
chr1	28907186	28907187	chr1_28907186_28907187_A	0	-
chr1	32377456	32377457	chr1_32377456_32377457_A	0	-
chr1	32628811	32628812	chr1_32628811_32628812_T	0	+
chr1	32658781	32658782	chr1_32658781_32658782_T	0	+
chr1	32672577	32672578	chr1_32672577_32672578_C	0	+
chr1	32681420	32681421	chr1_32681420_32681421_C	0	-
chr1	32798270	32798271	chr1_32798270_32798271_C	0	+
chr1	32798454	32798455	chr1_32798454_32798455_A	0	+
chr1	32849393	32849394	chr1_32849393_32849394_T	0	-
chr1	33134550	33134551	chr1_33134550_33134551_A	0	+
chr1	33149520	33149521	chr1_33149520_33149521_T	0	-
chr1	33241724	33241725	chr1_33241724_33241725_A	0	-
chr1	33248163	33248164	chr1_33248163_33248164_A	0	-
chr1	33252071	33252072	chr1_33252071_33252072_T	0	-
chr1	33411255	33411256	chr1_33411255_33411256_A	0	-
chr1	3394968	3394969	chr1_3394968_3394969_A	0	+
chr1	35643021	35643022	chr1_35643021_35643022_A	0	-
chr1	35650336	35650337	chr1_35650336_35650337_T	0	-
chr1	35653719	35653720	chr1_35653719_35653720_T	0	-
chr1	35657157	35657158	chr1_35657157_35657158_T	0	-
chr1	35827197	35827198	chr1_35827197_35827198_A	0	+
chr1	35852570	35852571	chr1_35852570_35852571_A	0	+
chr1	36028765	36028766	chr1_36028765_36028766_C	0	+
chr1	36028771	36028772	chr1_36028771_36028772_C	0	+
chr1	36809070	36809071	chr1_36809070_36809071_T	0	-
chr1	37947173	37947174	chr1_37947173_37947174_T	0	+
chr1	37948011	37948012	chr1_37948011_37948012_A	0	+
chr1	38042196	38042197	chr1_38042196_38042197_A	0	-
chr1	38149122	38149123	chr1_38149122_38149123_T	0	-
chr1	38155578	38155579	chr1_38155578_38155579_T	0	-
chr1	38171091	38171092	chr1_38171091_38171092_A	0	+
chr1	38269691	38269692	chr1_38269691_38269692_T	0	-
chr1	38269703	38269704	chr1_38269703_38269704_A	0	-
chr1	38344019	38344020	chr1_38344019_38344020_T	0	-
chr1	38449957	38449958	chr1_38449957_38449958_A	0	-
chr1	38450475	38450476	chr1_38450475_38450476_C	0	-
chr1	38453243	38453244	chr1_38453243_38453244_G	0	-
chr1	39332696	39332697	chr1_39332696_39332697_T	0	-
chr1	39802825	39802826	chr1_39802825_39802826_T	0	+
chr1	39806146	39806147	chr1_39806146_39806147_A	0	+
chr1	39889675	39889676	chr1_39889675_39889676_A	0	+
chr1	39909086	39909087	chr1_39909086_39909087_T	0	+
chr1	39917801	39917802	chr1_39917801_39917802_A	0	+
chr1	40027482	40027483	chr1_40027482_40027483_T	0	-
chr1	40029618	40029619	chr1_40029618_40029619_A	0	-
chr1	40037047	40037048	chr1_40037047_40037048_T	0	-
chr1	40218932	40218933	chr1_40218932_40218933_T	0	+
chr1	40312989	40312990	chr1_40312989_40312990_T	0	-
chr1	40318620	40318621	chr1_40318620_40318621_A	0	-
chr1	41454236	41454237	chr1_41454236_41454237_T	0	+
chr1	41473089	41473090	chr1_41473089_41473090_T	0	+
chr1	41475701	41475702	chr1_41475701_41475702_A	0	+
chr1	43124491	43124492	chr1_43124491_43124492_T	0	+
chr1	43149038	43149039	chr1_43149038_43149039_A	0	+
chr1	43162116	43162117	chr1_43162116_43162117_A	0	+
chr1	43167623	43167624	chr1_43167623_43167624_A	0	+
chr1	43212548	43212549	chr1_43212548_43212549_G	0	-
chr1	43220679	43220680	chr1_43220679_43220680_A	0	-
chr1	43826369	43826370	chr1_43826369_43826370_C	0	+
chr1	43831071	43831072	chr1_43831071_43831072_T	0	-
chr1	43895950	43895951	chr1_43895950_43895951_C	0	+
chr1	44057455	44057456	chr1_44057455_44057456_T	0	+
chr1	44058106	44058107	chr1_44058106_44058107_A	0	+
chr1	44070841	44070842	chr1_44070841_44070842_C	0	+
chr1	44447340	44447341	chr1_44447340_44447341_T	0	+
chr1	44467323	44467324	chr1_44467323_44467324_T	0	-
chr1	44685459	44685460	chr1_44685459_44685460_T	0	+
chr1	45101678	45101679	chr1_45101678_45101679_T	0	+
chr1	45116347	45116348	chr1_45116347_45116348_A	0	+
chr1	45206557	45206558	chr1_45206557_45206558_T	0	+
chr1	45219357	45219358	chr1_45219357_45219358_A	0	+
chr1	45219361	45219362	chr1_45219361_45219362_A	0	+
chr1	45219364	45219365	chr1_45219364_45219365_G	0	+
chr1	45219369	45219370	chr1_45219369_45219370_T	0	+
chr1	45220385	45220386	chr1_45220385_45220386_A	0	+
chr1	45220386	45220387	chr1_45220386_45220387_A	0	+
chr1	45223551	45223552	chr1_45223551_45223552_C	0	+
chr1	45223552	45223553	chr1_45223552_45223553_A	0	+
chr1	45227995	45227996	chr1_45227995_45227996_T	0	+
chr1	45227997	45227998	chr1_45227997_45227998_A	0	+
chr1	45242314	45242315	chr1_45242314_45242315_T	0	+
chr1	45243261	45243262	chr1_45243261_45243262_A	0	+
chr1	45243646	45243647	chr1_45243646_45243647_T	0	+
chr1	45243648	45243649	chr1_45243648_45243649_A	0	+
chr1	45244223	45244224	chr1_45244223_45244224_T	0	+
chr1	45269578	45269579	chr1_45269578_45269579_C	0	+
chr1	45807594	45807595	chr1_45807594_45807595_A	0	+
chr1	45808033	45808034	chr1_45808033_45808034_T	0	+
chr1	45973852	45973853	chr1_45973852_45973853_A	0	+
chr1	45980693	45980694	chr1_45980693_45980694_T	0	-
chr1	46034560	46034561	chr1_46034560_46034561_T	0	+
chr1	46060319	46060320	chr1_46060319_46060320_A	0	+
chr1	46095383	46095384	chr1_46095383_46095384_G	0	-
chr1	46488546	46488547	chr1_46488546_46488547_C	0	+
chr1	46488875	46488876	chr1_46488875_46488876_T	0	+
chr1	46488878	46488879	chr1_46488878_46488879_C	0	+
chr1	46488881	46488882	chr1_46488881_46488882_C	0	+
chr1	46488882	46488883	chr1_46488882_46488883_T	0	+
chr1	46738997	46738998	chr1_46738997_46738998_T	0	+
chr1	47840561	47840562	chr1_47840561_47840562_A	0	+
chr1	47840725	47840726	chr1_47840725_47840726_A	0	+
chr1	51436006	51436007	chr1_51436006_51436007_A	0	+
chr1	51912799	51912800	chr1_51912799_51912800_A	0	-
chr1	52258115	52258116	chr1_52258115_52258116_T	0	-
chr1	52819971	52819972	chr1_52819971_52819972_C	0	-
chr1	52821534	52821535	chr1_52821534_52821535_C	0	-
chr1	52823593	52823594	chr1_52823593_52823594_T	0	-
chr1	52826238	52826239	chr1_52826238_52826239_T	0	-
chr1	52826829	52826830	chr1_52826829_52826830_T	0	-
chr1	52826830	52826831	chr1_52826830_52826831_C	0	-
chr1	52876769	52876770	chr1_52876769_52876770_A	0	+
chr1	52878163	52878164	chr1_52878163_52878164_A	0	+
chr1	54332075	54332076	chr1_54332075_54332076_C	0	-
chr1	54706657	54706658	chr1_54706657_54706658_T	0	-
chr1	55522976	55522977	chr1_55522976_55522977_C	0	+
chr1	55527023	55527024	chr1_55527023_55527024_T	0	+
chr1	59154808	59154809	chr1_59154808_59154809_A	0	-
chr1	6265538	6265539	chr1_6265538_6265539_A	0	-
chr1	62907131	62907132	chr1_62907131_62907132_T	0	+
chr1	63084564	63084565	chr1_63084564_63084565_A	0	-
chr1	65335180	65335181	chr1_65335180_65335181_A	0	-
chr1	6586090	6586091	chr1_6586090_6586091_C	0	-
chr1	6592854	6592855	chr1_6592854_6592855_A	0	-
chr1	6646628	6646629	chr1_6646628_6646629_C	0	+
chr1	6697589	6697590	chr1_6697589_6697590_A	0	-
chr1	6705214	6705215	chr1_6705214_6705215_A	0	-
chr1	6706100	6706101	chr1_6706100_6706101_A	0	-
chr1	67889981	67889982	chr1_67889981_67889982_A	0	-
chr1	68613918	68613919	chr1_68613918_68613919_A	0	-
chr1	705114	705115	chr1_705114_705115_A	0	-
chr1	70697928	70697929	chr1_70697928_70697929_A	0	+
chr1	70895448	70895449	chr1_70895448_70895449_A	0	+
chr1	76254825	76254826	chr1_76254825_76254826_A	0	+
chr1	76256106	76256107	chr1_76256106_76256107_A	0	+
chr1	76256931	76256932	chr1_76256931_76256932_G	0	+
chr1	76256945	76256946	chr1_76256945_76256946_T	0	+
chr1	78329541	78329542	chr1_78329541_78329542_A	0	+
chr1	78414497	78414498	chr1_78414497_78414498_T	0	-
chr1	78434794	78434795	chr1_78434794_78434795_A	0	-
chr1	85135598	85135599	chr1_85135598_85135599_A	0	-
chr1	86046862	86046863	chr1_86046862_86046863_C	0	+
chr1	86047566	86047567	chr1_86047566_86047567_T	0	+
chr1	86047572	86047573	chr1_86047572_86047573_T	0	+
chr1	87805703	87805704	chr1_87805703_87805704_T	0	+
chr1	879051	879052	chr1_879051_879052_T	0	+
chr1	8921535	8921536	chr1_8921535_8921536_T	0	-
chr1	89237075	89237076	chr1_89237075_89237076_G	0	+
chr1	899269	899270	chr1_899269_899270_G	0	+
chr1	93298921	93298922	chr1_93298921_93298922_T	0	+
chr1	94033082	94033083	chr1_94033082_94033083_A	0	-
chr1	9791472	9791473	chr1_9791472_9791473_A	0	-
chr1	9791479	9791480	chr1_9791479_9791480_A	0	-
chr1	9795701	9795702	chr1_9795701_9795702_T	0	-
chr10	100193873	100193874	chr10_100193873_100193874_C	0	-
chr10	100193875	100193876	chr10_100193875_100193876_C	0	-
chr10	101515345	101515346	chr10_101515345_101515346_A	0	+
chr10	101565096	101565097	chr10_101565096_101565097_A	0	+
chr10	101645671	101645672	chr10_101645671_101645672_T	0	-
chr10	101935861	101935862	chr10_101935861_101935862_G	0	-
chr10	101953910	101953911	chr10_101953910_101953911_T	0	-
chr10	102040011	102040012	chr10_102040011_102040012_A	0	-
chr10	102283709	102283710	chr10_102283709_102283710_G	0	-
chr10	102289287	102289288	chr10_102289287_102289288_T	0	-
chr10	102306874	102306875	chr10_102306874_102306875_T	0	+
chr10	102822274	102822275	chr10_102822274_102822275_T	0	+
chr10	103342677	103342678	chr10_103342677_103342678_A	0	-
chr10	103343473	103343474	chr10_103343473_103343474_A	0	-
chr10	103344704	103344705	chr10_103344704_103344705_T	0	-
chr10	103572910	103572911	chr10_103572910_103572911_A	0	-
chr10	103869473	103869474	chr10_103869473_103869474_T	0	-
chr10	103869497	103869498	chr10_103869497_103869498_A	0	-
chr10	103898347	103898348	chr10_103898347_103898348_G	0	+
chr10	103898349	103898350	chr10_103898349_103898350_A	0	+
chr10	103919621	103919622	chr10_103919621_103919622_C	0	+
chr10	103921288	103921289	chr10_103921288_103921289_T	0	+
chr10	103921833	103921834	chr10_103921833_103921834_C	0	+
chr10	103921843	103921844	chr10_103921843_103921844_T	0	+
chr10	104112181	104112182	chr10_104112181_104112182_T	0	+
chr10	104118985	104118986	chr10_104118985_104118986_T	0	+
chr10	104123434	104123435	chr10_104123434_104123435_A	0	+
chr10	104139585	104139586	chr10_104139585_104139586_A	0	+
chr10	104241551	104241552	chr10_104241551_104241552_C	0	-
chr10	104242883	104242884	chr10_104242883_104242884_T	0	-
chr10	1043120	1043121	chr10_1043120_1043121_T	0	+
chr10	1044920	1044921	chr10_1044920_1044921_T	0	+
chr10	105199477	105199478	chr10_105199477_105199478_A	0	+
chr10	105200020	105200021	chr10_105200020_105200021_T	0	+
chr10	1089358	1089359	chr10_1089358_1089359_A	0	-
chr10	1089360	1089361	chr10_1089360_1089361_A	0	-
chr10	114193069	114193070	chr10_114193069_114193070_T	0	-
chr10	114911450	114911451	chr10_114911450_114911451_T	0	+
chr10	1151034	1151035	chr10_1151034_1151035_A	0	+
chr10	116203948	116203949	chr10_116203948_116203949_A	0	-
chr10	11797217	11797218	chr10_11797217_11797218_A	0	+
chr10	118440789	118440790	chr10_118440789_118440790_A	0	-
chr10	11984787	11984788	chr10_11984787_11984788_T	0	-
chr10	11990547	11990548	chr10_11990547_11990548_A	0	-
chr10	120445711	120445712	chr10_120445711_120445712_T	0	-
chr10	120488943	120488944	chr10_120488943_120488944_A	0	-
chr10	120796846	120796847	chr10_120796846_120796847_T	0	-
chr10	120810228	120810229	chr10_120810228_120810229_A	0	-
chr10	120905886	120905887	chr10_120905886_120905887_A	0	-
chr10	120907397	120907398	chr10_120907397_120907398_A	0	-
chr10	120928045	120928046	chr10_120928045_120928046_G	0	-
chr10	121336734	121336735	chr10_121336734_121336735_A	0	-
chr10	121336738	121336739	chr10_121336738_121336739_A	0	-
chr10	121602133	121602134	chr10_121602133_121602134_T	0	-
chr10	121692483	121692484	chr10_121692483_121692484_T	0	+
chr10	122624478	122624479	chr10_122624478_122624479_T	0	+
chr10	12289278	12289279	chr10_12289278_12289279_A	0	-
chr10	124711573	124711574	chr10_124711573_124711574_A	0	-
chr10	126662742	126662743	chr10_126662742_126662743_A	0	+
chr10	126691698	126691699	chr10_126691698_126691699_C	0	-
chr10	127437941	127437942	chr10_127437941_127437942_A	0	+
chr10	127519962	127519963	chr10_127519962_127519963_A	0	+
chr10	133754063	133754064	chr10_133754063_133754064_A	0	+
chr10	135084813	135084814	chr10_135084813_135084814_A	0	-
chr10	135183563	135183564	chr10_135183563_135183564_A	0	-
chr10	13736076	13736077	chr10_13736076_13736077_A	0	-
chr10	17277818	17277819	chr10_17277818_17277819_T	0	+
chr10	17279203	17279204	chr10_17279203_17279204_T	0	+
chr10	17729998	17729999	chr10_17729998_17729999_T	0	+
chr10	21139455	21139456	chr10_21139455_21139456_A	0	-
chr10	22022394	22022395	chr10_22022394_22022395_A	0	+
chr10	22217500	22217501	chr10_22217500_22217501_A	0	-
chr10	25755553	25755554	chr10_25755553_25755554_A	0	+
chr10	27024348	27024349	chr10_27024348_27024349_T	0	+
chr10	28903475	28903476	chr10_28903475_28903476_A	0	+
chr10	28905078	28905079	chr10_28905078_28905079_A	0	+
chr10	29775516	29775517	chr10_29775516_29775517_A	0	-
chr10	3178621	3178622	chr10_3178621_3178622_G	0	+
chr10	32132550	32132551	chr10_32132550_32132551_A	0	-
chr10	32327783	32327784	chr10_32327783_32327784_G	0	-
chr10	33211298	33211299	chr10_33211298_33211299_T	0	-
chr10	43288374	43288375	chr10_43288374_43288375_T	0	+
chr10	43293888	43293889	chr10_43293888_43293889_A	0	+
chr10	47162202	47162203	chr10_47162202_47162203_A	0	-
chr10	47232322	47232323	chr10_47232322_47232323_A	0	-
chr10	47758822	47758823	chr10_47758822_47758823_A	0	+
chr10	48267147	48267148	chr10_48267147_48267148_A	0	+
chr10	50681098	50681099	chr10_50681098_50681099_T	0	-
chr10	51586242	51586243	chr10_51586242_51586243_A	0	+
chr10	5754750	5754751	chr10_5754750_5754751_A	0	+
chr10	5766357	5766358	chr10_5766357_5766358_A	0	+
chr10	5766361	5766362	chr10_5766361_5766362_A	0	+
chr10	58118735	58118736	chr10_58118735_58118736_A	0	-
chr10	5815931	5815932	chr10_5815931_5815932_A	0	-
chr10	60047297	60047298	chr10_60047297_60047298_A	0	+
chr10	60145945	60145946	chr10_60145945_60145946_T	0	+
chr10	60147905	60147906	chr10_60147905_60147906_A	0	+
chr10	62545402	62545403	chr10_62545402_62545403_A	0	+
chr10	63850593	63850594	chr10_63850593_63850594_T	0	+
chr10	70098869	70098870	chr10_70098869_70098870_T	0	+
chr10	70179674	70179675	chr10_70179674_70179675_A	0	-
chr10	70482188	70482189	chr10_70482188_70482189_A	0	+
chr10	70517022	70517023	chr10_70517022_70517023_T	0	+
chr10	70726739	70726740	chr10_70726739_70726740_A	0	+
chr10	71142203	71142204	chr10_71142203_71142204_A	0	+
chr10	71151842	71151843	chr10_71151842_71151843_A	0	+
chr10	71160711	71160712	chr10_71160711_71160712_C	0	+
chr10	71874119	71874120	chr10_71874119_71874120_T	0	-
chr10	71903755	71903756	chr10_71903755_71903756_G	0	-
chr10	71920859	71920860	chr10_71920859_71920860_A	0	-
chr10	72645016	72645017	chr10_72645016_72645017_T	0	-
chr10	73822947	73822948	chr10_73822947_73822948_T	0	-
chr10	74096479	74096480	chr10_74096479_74096480_A	0	-
chr10	7409881	7409882	chr10_7409881_7409882_A	0	-
chr10	74103303	74103304	chr10_74103303_74103304_A	0	-
chr10	74908191	74908192	chr10_74908191_74908192_A	0	-
chr10	75264772	75264773	chr10_75264772_75264773_C	0	-
chr10	75549685	75549686	chr10_75549685_75549686_T	0	+
chr10	75565809	75565810	chr10_75565809_75565810_A	0	-
chr10	75849748	75849749	chr10_75849748_75849749_A	0	+
chr10	75873916	75873917	chr10_75873916_75873917_A	0	+
chr10	7841709	7841710	chr10_7841709_7841710_A	0	+
chr10	79567726	79567727	chr10_79567726_79567727_A	0	-
chr10	79589310	79589311	chr10_79589310_79589311_G	0	-
chr10	79741335	79741336	chr10_79741335_79741336_C	0	-
chr10	81064880	81064881	chr10_81064880_81064881_A	0	+
chr10	81111220	81111221	chr10_81111220_81111221_A	0	+
chr10	81927094	81927095	chr10_81927094_81927095_T	0	-
chr10	82266957	82266958	chr10_82266957_82266958_T	0	+
chr10	85911993	85911994	chr10_85911993_85911994_A	0	+
chr10	88232130	88232131	chr10_88232130_88232131_A	0	-
chr10	88728735	88728736	chr10_88728735_88728736_G	0	-
chr10	89548915	89548916	chr10_89548915_89548916_A	0	-
chr10	93579669	93579670	chr10_93579669_93579670_A	0	+
chr10	93615336	93615337	chr10_93615336_93615337_A	0	+
chr10	93786837	93786838	chr10_93786837_93786838_C	0	+
chr10	93786855	93786856	chr10_93786855_93786856_T	0	+
chr10	94407940	94407941	chr10_94407940_94407941_A	0	+
chr10	95119754	95119755	chr10_95119754_95119755_A	0	-
chr10	96342695	96342696	chr10_96342695_96342696_A	0	+
chr10	96997900	96997901	chr10_96997900_96997901_T	0	-
chr10	97442952	97442953	chr10_97442952_97442953_G	0	-
chr10	97915657	97915658	chr10_97915657_97915658_T	0	+
chr10	98312843	98312844	chr10_98312843_98312844_G	0	-
chr10	98711827	98711828	chr10_98711827_98711828_A	0	+
chr10	99132979	99132980	chr10_99132979_99132980_G	0	-
chr10	99197054	99197055	chr10_99197054_99197055_C	0	-
chr10	99215345	99215346	chr10_99215345_99215346_A	0	+
chr10	99228884	99228885	chr10_99228884_99228885_A	0	-
chr10	99240826	99240827	chr10_99240826_99240827_A	0	-
chr10	99511126	99511127	chr10_99511126_99511127_T	0	+
chr10	99517376	99517377	chr10_99517376_99517377_T	0	+
chr11	1007999	1008000	chr11_1007999_1008000_T	0	+
chr11	102960068	102960069	chr11_102960068_102960069_A	0	-
chr11	10778262	10778263	chr11_10778262_10778263_A	0	+
chr11	108124521	108124522	chr11_108124521_108124522_A	0	+
chr11	10821329	10821330	chr11_10821329_10821330_A	0	-
chr11	10827625	10827626	chr11_10827625_10827626_A	0	-
chr11	10829779	10829780	chr11_10829779_10829780_A	0	-
chr11	111572146	111572147	chr11_111572146_111572147_A	0	+
chr11	111591177	111591178	chr11_111591177_111591178_T	0	+
chr11	111916559	111916560	chr11_111916559_111916560_T	0	+
chr11	116655891	116655892	chr11_116655891_116655892_A	0	-
chr11	116732672	116732673	chr11_116732672_116732673_A	0	-
chr11	117153427	117153428	chr11_117153427_117153428_T	0	+
chr11	117282469	117282470	chr11_117282469_117282470_C	0	+
chr11	117282477	117282478	chr11_117282477_117282478_C	0	+
chr11	118392576	118392577	chr11_118392576_118392577_A	0	+
chr11	118502609	118502610	chr11_118502609_118502610_A	0	+
chr11	118770243	118770244	chr11_118770243_118770244_T	0	-
chr11	118916565	118916566	chr11_118916565_118916566_T	0	-
chr11	118926906	118926907	chr11_118926906_118926907_A	0	-
chr11	118964989	118964990	chr11_118964989_118964990_C	0	-
chr11	119004769	119004770	chr11_119004769_119004770_C	0	+
chr11	119168067	119168068	chr11_119168067_119168068_A	0	+
chr11	11952219	11952220	chr11_11952219_11952220_A	0	+
chr11	11976393	11976394	chr11_11976393_11976394_A	0	+
chr11	120346018	120346019	chr11_120346018_120346019_T	0	+
chr11	122929561	122929562	chr11_122929561_122929562_T	0	-
chr11	122929993	122929994	chr11_122929993_122929994_T	0	-
chr11	122930002	122930003	chr11_122930002_122930003_T	0	-
chr11	122931001	122931002	chr11_122931001_122931002_A	0	-
chr11	122931199	122931200	chr11_122931199_122931200_C	0	-
chr11	122932060	122932061	chr11_122932060_122932061_A	0	-
chr11	123988847	123988848	chr11_123988847_123988848_A	0	+
chr11	126135366	126135367	chr11_126135366_126135367_A	0	-
chr11	126145656	126145657	chr11_126145656_126145657_C	0	+
chr11	128933941	128933942	chr11_128933941_128933942_A	0	-
chr11	12901226	12901227	chr11_12901226_12901227_A	0	+
chr11	129754101	129754102	chr11_129754101_129754102_A	0	-
chr11	134027987	134027988	chr11_134027987_134027988_T	0	-
chr11	14479453	14479454	chr11_14479453_14479454_T	0	-
chr11	14481876	14481877	chr11_14481876_14481877_T	0	-
chr11	14540617	14540618	chr11_14540617_14540618_A	0	-
chr11	14540662	14540663	chr11_14540662_14540663_T	0	-
chr11	14540731	14540732	chr11_14540731_14540732_A	0	-
chr11	18332538	18332539	chr11_18332538_18332539_A	0	-
chr11	18359630	18359631	chr11_18359630_18359631_A	0	+
chr11	19253943	19253944	chr11_19253943_19253944_A	0	-
chr11	20065502	20065503	chr11_20065502_20065503_A	0	+
chr11	20136109	20136110	chr11_20136109_20136110_A	0	+
chr11	20136118	20136119	chr11_20136118_20136119_C	0	+
chr11	20409541	20409542	chr11_20409541_20409542_T	0	+
chr11	213263	213264	chr11_213263_213264_A	0	+
chr11	214203	214204	chr11_214203_214204_A	0	+
chr11	2417074	2417075	chr11_2417074_2417075_A	0	+
chr11	27520382	27520383	chr11_27520382_27520383_A	0	-
chr11	3040004	3040005	chr11_3040004_3040005_G	0	-
chr11	3062241	3062242	chr11_3062241_3062242_G	0	-
chr11	308889	308890	chr11_308889_308890_G	0	+
chr11	32122060	32122061	chr11_32122060_32122061_A	0	+
chr11	32976818	32976819	chr11_32976818_32976819_A	0	+
chr11	33360264	33360265	chr11_33360264_33360265_A	0	+
chr11	33374595	33374596	chr11_33374595_33374596_A	0	+
chr11	3390761	3390762	chr11_3390761_3390762_A	0	-
chr11	3390768	3390769	chr11_3390768_3390769_A	0	-
chr11	34119226	34119227	chr11_34119226_34119227_A	0	+
chr11	34129734	34129735	chr11_34129734_34129735_A	0	+
chr11	34156671	34156672	chr11_34156671_34156672_T	0	+
chr11	34163790	34163791	chr11_34163790_34163791_A	0	+
chr11	34182655	34182656	chr11_34182655_34182656_A	0	-
chr11	34186404	34186405	chr11_34186404_34186405_T	0	-
chr11	3752913	3752914	chr11_3752913_3752914_A	0	-
chr11	396588	396589	chr11_396588_396589_C	0	+
chr11	406082	406083	chr11_406082_406083_G	0	-
chr11	4133099	4133100	chr11_4133099_4133100_A	0	+
chr11	4143341	4143342	chr11_4143341_4143342_T	0	+
chr11	43922998	43922999	chr11_43922998_43922999_T	0	+
chr11	45936266	45936267	chr11_45936266_45936267_T	0	-
chr11	45971055	45971056	chr11_45971055_45971056_A	0	-
chr11	46702322	46702323	chr11_46702322_46702323_T	0	-
chr11	46774289	46774290	chr11_46774289_46774290_T	0	-
chr11	47188210	47188211	chr11_47188210_47188211_T	0	-
chr11	47193369	47193370	chr11_47193369_47193370_T	0	-
chr11	47441987	47441988	chr11_47441987_47441988_C	0	-
chr11	47441988	47441989	chr11_47441988_47441989_C	0	-
chr11	47445758	47445759	chr11_47445758_47445759_T	0	-
chr11	47504435	47504436	chr11_47504435_47504436_T	0	-
chr11	47745749	47745750	chr11_47745749_47745750_A	0	-
chr11	47753137	47753138	chr11_47753137_47753138_A	0	-
chr11	47826183	47826184	chr11_47826183_47826184_T	0	-
chr11	47826192	47826193	chr11_47826192_47826193_A	0	-
chr11	47843407	47843408	chr11_47843407_47843408_T	0	-
chr11	57068095	57068096	chr11_57068095_57068096_A	0	-
chr11	57068550	57068551	chr11_57068550_57068551_C	0	-
chr11	57068555	57068556	chr11_57068555_57068556_T	0	-
chr11	57069723	57069724	chr11_57069723_57069724_A	0	-
chr11	57102748	57102749	chr11_57102748_57102749_T	0	-
chr11	57188639	57188640	chr11_57188639_57188640_A	0	-
chr11	57194145	57194146	chr11_57194145_57194146_G	0	-
chr11	57194146	57194147	chr11_57194146_57194147_T	0	-
chr11	57296420	57296421	chr11_57296420_57296421_T	0	-
chr11	57457474	57457475	chr11_57457474_57457475_C	0	+
chr11	57467307	57467308	chr11_57467307_57467308_T	0	+
chr11	57505358	57505359	chr11_57505358_57505359_T	0	+
chr11	57510306	57510307	chr11_57510306_57510307_A	0	+
chr11	57577557	57577558	chr11_57577557_57577558_T	0	+
chr11	59420079	59420080	chr11_59420079_59420080_A	0	-
chr11	59420084	59420085	chr11_59420084_59420085_A	0	-
chr11	596895	596896	chr11_596895_596896_A	0	+
chr11	60666801	60666802	chr11_60666801_60666802_A	0	-
chr11	60900033	60900034	chr11_60900033_60900034_T	0	-
chr11	60900838	60900839	chr11_60900838_60900839_A	0	-
chr11	610480	610481	chr11_610480_610481_A	0	+
chr11	61067719	61067720	chr11_61067719_61067720_T	0	-
chr11	61070661	61070662	chr11_61070661_61070662_A	0	-
chr11	61070663	61070664	chr11_61070663_61070664_T	0	-
chr11	61089192	61089193	chr11_61089192_61089193_T	0	-
chr11	61103541	61103542	chr11_61103541_61103542_A	0	+
chr11	61110772	61110773	chr11_61110772_61110773_C	0	+
chr11	61178593	61178594	chr11_61178593_61178594_A	0	-
chr11	61503712	61503713	chr11_61503712_61503713_A	0	+
chr11	61580163	61580164	chr11_61580163_61580164_A	0	-
chr11	61580165	61580166	chr11_61580165_61580166_T	0	-
chr11	61732606	61732607	chr11_61732606_61732607_T	0	-
chr11	61732607	61732608	chr11_61732607_61732608_A	0	-
chr11	61732611	61732612	chr11_61732611_61732612_A	0	-
chr11	61907687	61907688	chr11_61907687_61907688_A	0	+
chr11	61908938	61908939	chr11_61908938_61908939_T	0	+
chr11	61912420	61912421	chr11_61912420_61912421_A	0	+
chr11	61914108	61914109	chr11_61914108_61914109_T	0	+
chr11	62159511	62159512	chr11_62159511_62159512_A	0	+
chr11	62365207	62365208	chr11_62365207_62365208_T	0	-
chr11	62371694	62371695	chr11_62371694_62371695_C	0	-
chr11	62393427	62393428	chr11_62393427_62393428_A	0	-
chr11	62593043	62593044	chr11_62593043_62593044_A	0	-
chr11	62594889	62594890	chr11_62594889_62594890_T	0	-
chr11	62607450	62607451	chr11_62607450_62607451_T	0	-
chr11	62620332	62620333	chr11_62620332_62620333_A	0	-
chr11	62620611	62620612	chr11_62620611_62620612_A	0	-
chr11	62620617	62620618	chr11_62620617_62620618_A	0	-
chr11	62621323	62621324	chr11_62621323_62621324_C	0	-
chr11	62621325	62621326	chr11_62621325_62621326_C	0	-
chr11	62621537	62621538	chr11_62621537_62621538_A	0	-
chr11	62622709	62622710	chr11_62622709_62622710_G	0	-
chr11	62622963	62622964	chr11_62622963_62622964_A	0	-
chr11	62622970	62622971	chr11_62622970_62622971_T	0	-
chr11	62648614	62648615	chr11_62648614_62648615_T	0	+
chr11	63403089	63403090	chr11_63403089_63403090_A	0	-
chr11	63663022	63663023	chr11_63663022_63663023_G	0	+
chr11	63971504	63971505	chr11_63971504_63971505_T	0	+
chr11	63992463	63992464	chr11_63992463_63992464_T	0	-
chr11	64011284	64011285	chr11_64011284_64011285_T	0	+
chr11	64021857	64021858	chr11_64021857_64021858_T	0	+
chr11	64021859	64021860	chr11_64021859_64021860_A	0	+
chr11	64535331	64535332	chr11_64535331_64535332_A	0	-
chr11	64535479	64535480	chr11_64535479_64535480_A	0	-
chr11	64570145	64570146	chr11_64570145_64570146_A	0	-
chr11	64570159	64570160	chr11_64570159_64570160_A	0	-
chr11	64574772	64574773	chr11_64574772_64574773_T	0	-
chr11	64594890	64594891	chr11_64594890_64594891_A	0	-
chr11	64601476	64601477	chr11_64601476_64601477_A	0	-
chr11	64680888	64680889	chr11_64680888_64680889_A	0	-
chr11	64697920	64697921	chr11_64697920_64697921_A	0	+
chr11	64700586	64700587	chr11_64700586_64700587_A	0	+
chr11	64789420	64789421	chr11_64789420_64789421_C	0	+
chr11	64880672	64880673	chr11_64880672_64880673_A	0	+
chr11	6501320	6501321	chr11_6501320_6501321_A	0	-
chr11	65046126	65046127	chr11_65046126_65046127_A	0	+
chr11	65046978	65046979	chr11_65046978_65046979_T	0	+
chr11	65063310	65063311	chr11_65063310_65063311_G	0	+
chr11	65191075	65191076	chr11_65191075_65191076_T	0	+
chr11	65314413	65314414	chr11_65314413_65314414_T	0	-
chr11	65338829	65338830	chr11_65338829_65338830_T	0	+
chr11	65386980	65386981	chr11_65386980_65386981_T	0	+
chr11	65403615	65403616	chr11_65403615_65403616_T	0	+
chr11	65429333	65429334	chr11_65429333_65429334_G	0	-
chr11	65629886	65629887	chr11_65629886_65629887_C	0	+
chr11	65631933	65631934	chr11_65631933_65631934_T	0	+
chr11	65632545	65632546	chr11_65632545_65632546_T	0	+
chr11	65652703	65652704	chr11_65652703_65652704_A	0	-
chr11	65767175	65767176	chr11_65767175_65767176_T	0	-
chr11	65824705	65824706	chr11_65824705_65824706_T	0	+
chr11	6584588	6584589	chr11_6584588_6584589_A	0	+
chr11	6584893	6584894	chr11_6584893_6584894_C	0	+
chr11	66034316	66034317	chr11_66034316_66034317_T	0	+
chr11	66100253	66100254	chr11_66100253_66100254_A	0	-
chr11	66101158	66101159	chr11_66101158_66101159_A	0	-
chr11	66133724	66133725	chr11_66133724_66133725_A	0	-
chr11	66136171	66136172	chr11_66136171_66136172_A	0	-
chr11	66139103	66139104	chr11_66139103_66139104_T	0	-
chr11	66139104	66139105	chr11_66139104_66139105_C	0	-
chr11	6622861	6622862	chr11_6622861_6622862_A	0	-
chr11	6632707	6632708	chr11_6632707_6632708_A	0	-
chr11	66367932	66367933	chr11_66367932_66367933_T	0	+
chr11	66412073	66412074	chr11_66412073_66412074_T	0	+
chr11	66453942	66453943	chr11_66453942_66453943_A	0	-
chr11	67013415	67013416	chr11_67013415_67013416_T	0	+
chr11	67013417	67013418	chr11_67013417_67013418_A	0	+
chr11	67075614	67075615	chr11_67075614_67075615_A	0	+
chr11	67160939	67160940	chr11_67160939_67160940_T	0	+
chr11	67168690	67168691	chr11_67168690_67168691_T	0	-
chr11	67200786	67200787	chr11_67200786_67200787_C	0	+
chr11	67375834	67375835	chr11_67375834_67375835_A	0	+
chr11	67786608	67786609	chr11_67786608_67786609_C	0	+
chr11	67786610	67786611	chr11_67786610_67786611_C	0	+
chr11	67786612	67786613	chr11_67786612_67786613_A	0	+
chr11	67811487	67811488	chr11_67811487_67811488_A	0	+
chr11	67811528	67811529	chr11_67811528_67811529_A	0	+
chr11	68207217	68207218	chr11_68207217_68207218_T	0	+
chr11	68367786	68367787	chr11_68367786_68367787_A	0	+
chr11	6964731	6964732	chr11_6964731_6964732_A	0	+
chr11	70202129	70202130	chr11_70202129_70202130_A	0	+
chr11	70267518	70267519	chr11_70267518_70267519_A	0	+
chr11	70267523	70267524	chr11_70267523_70267524_A	0	+
chr11	70269020	70269021	chr11_70269020_70269021_A	0	+
chr11	71191189	71191190	chr11_71191189_71191190_T	0	+
chr11	71191191	71191192	chr11_71191191_71191192_A	0	+
chr11	71715411	71715412	chr11_71715411_71715412_T	0	-
chr11	71939747	71939748	chr11_71939747_71939748_T	0	+
chr11	71940346	71940347	chr11_71940346_71940347_A	0	+
chr11	71942519	71942520	chr11_71942519_71942520_T	0	+
chr11	71942520	71942521	chr11_71942520_71942521_G	0	+
chr11	71945294	71945295	chr11_71945294_71945295_T	0	+
chr11	71945297	71945298	chr11_71945297_71945298_T	0	+
chr11	71949064	71949065	chr11_71949064_71949065_T	0	+
chr11	72288679	72288680	chr11_72288679_72288680_T	0	-
chr11	72290672	72290673	chr11_72290672_72290673_C	0	-
chr11	72295391	72295392	chr11_72295391_72295392_C	0	-
chr11	72396753	72396754	chr11_72396753_72396754_T	0	-
chr11	72410618	72410619	chr11_72410618_72410619_C	0	-
chr11	72423638	72423639	chr11_72423638_72423639_T	0	-
chr11	72538200	72538201	chr11_72538200_72538201_T	0	+
chr11	73076404	73076405	chr11_73076404_73076405_A	0	+
chr11	73941934	73941935	chr11_73941934_73941935_A	0	+
chr11	74331035	74331036	chr11_74331035_74331036_A	0	+
chr11	74555348	74555349	chr11_74555348_74555349_A	0	-
chr11	75136649	75136650	chr11_75136649_75136650_C	0	-
chr11	764263	764264	chr11_764263_764264_G	0	+
chr11	7717045	7717046	chr11_7717045_7717046_T	0	-
chr11	77330761	77330762	chr11_77330761_77330762_A	0	-
chr11	77333735	77333736	chr11_77333735_77333736_A	0	-
chr11	773653	773654	chr11_773653_773654_T	0	-
chr11	8013600	8013601	chr11_8013600_8013601_C	0	+
chr11	8013606	8013607	chr11_8013606_8013607_T	0	+
chr11	812515	812516	chr11_812515_812516_A	0	+
chr11	822364	822365	chr11_822364_822365_A	0	+
chr11	82878143	82878144	chr11_82878143_82878144_A	0	+
chr11	82879439	82879440	chr11_82879439_82879440_A	0	+
chr11	82903959	82903960	chr11_82903959_82903960_C	0	-
chr11	837785	837786	chr11_837785_837786_A	0	+
chr11	837920	837921	chr11_837920_837921_A	0	+
chr11	85342698	85342699	chr11_85342698_85342699_A	0	+
chr11	85345103	85345104	chr11_85345103_85345104_A	0	+
chr11	85346679	85346680	chr11_85346679_85346680_A	0	+
chr11	85988926	85988927	chr11_85988926_85988927_T	0	+
chr11	870184	870185	chr11_870184_870185_T	0	-
chr11	8704728	8704729	chr11_8704728_8704729_A	0	+
chr11	8705529	8705530	chr11_8705529_8705530_C	0	+
chr11	8706239	8706240	chr11_8706239_8706240_G	0	+
chr11	89939469	89939470	chr11_89939469_89939470_T	0	-
chr11	89948484	89948485	chr11_89948484_89948485_A	0	-
chr11	93463635	93463636	chr11_93463635_93463636_T	0	-
chr11	93463639	93463640	chr11_93463639_93463640_A	0	-
chr11	93463878	93463879	chr11_93463878_93463879_G	0	-
chr11	93463901	93463902	chr11_93463901_93463902_T	0	-
chr11	93463913	93463914	chr11_93463913_93463914_A	0	-
chr11	93464397	93464398	chr11_93464397_93464398_A	0	-
chr11	93464408	93464409	chr11_93464408_93464409_A	0	-
chr11	93464992	93464993	chr11_93464992_93464993_A	0	-
chr11	93465000	93465001	chr11_93465000_93465001_A	0	-
chr11	93465476	93465477	chr11_93465476_93465477_A	0	-
chr11	93465479	93465480	chr11_93465479_93465480_G	0	-
chr11	93465492	93465493	chr11_93465492_93465493_A	0	-
chr11	93466313	93466314	chr11_93466313_93466314_T	0	-
chr11	93466586	93466587	chr11_93466586_93466587_A	0	-
chr11	93466593	93466594	chr11_93466593_93466594_A	0	-
chr11	93467849	93467850	chr11_93467849_93467850_A	0	-
chr11	93467852	93467853	chr11_93467852_93467853_T	0	-
chr11	93470434	93470435	chr11_93470434_93470435_C	0	-
chr11	93471691	93471692	chr11_93471691_93471692_A	0	-
chr11	9431451	9431452	chr11_9431451_9431452_T	0	+
chr11	9438584	9438585	chr11_9438584_9438585_T	0	+
chr11	9450057	9450058	chr11_9450057_9450058_A	0	+
chr11	9451191	9451192	chr11_9451191_9451192_A	0	+
chr11	9456455	9456456	chr11_9456455_9456456_T	0	+
chr11	94704256	94704257	chr11_94704256_94704257_A	0	-
chr11	9598658	9598659	chr11_9598658_9598659_A	0	+
chr11	9867316	9867317	chr11_9867316_9867317_T	0	-
chr11	988530	988531	chr11_988530_988531_A	0	+
chr12	102517636	102517637	chr12_102517636_102517637_T	0	+
chr12	104325270	104325271	chr12_104325270_104325271_G	0	+
chr12	104325969	104325970	chr12_104325969_104325970_A	0	+
chr12	104326574	104326575	chr12_104326574_104326575_T	0	+
chr12	104337485	104337486	chr12_104337485_104337486_A	0	+
chr12	104713218	104713219	chr12_104713218_104713219_A	0	+
chr12	104713221	104713222	chr12_104713221_104713222_A	0	+
chr12	104719088	104719089	chr12_104719088_104719089_A	0	+
chr12	105534651	105534652	chr12_105534651_105534652_A	0	+
chr12	105558371	105558372	chr12_105558371_105558372_A	0	+
chr12	106897826	106897827	chr12_106897826_106897827_A	0	+
chr12	107273519	107273520	chr12_107273519_107273520_A	0	+
chr12	10765605	10765606	chr12_10765605_10765606_A	0	-
chr12	10853979	10853980	chr12_10853979_10853980_T	0	-
chr12	108924115	108924116	chr12_108924115_108924116_A	0	-
chr12	109046233	109046234	chr12_109046233_109046234_A	0	-
chr12	109683949	109683950	chr12_109683949_109683950_A	0	+
chr12	109968327	109968328	chr12_109968327_109968328_A	0	+
chr12	110720336	110720337	chr12_110720336_110720337_T	0	+
chr12	110782664	110782665	chr12_110782664_110782665_A	0	+
chr12	110874039	110874040	chr12_110874039_110874040_A	0	-
chr12	110929949	110929950	chr12_110929949_110929950_A	0	-
chr12	111158996	111158997	chr12_111158996_111158997_T	0	-
chr12	111160095	111160096	chr12_111160095_111160096_T	0	-
chr12	112601093	112601094	chr12_112601093_112601094_C	0	-
chr12	112669540	112669541	chr12_112669540_112669541_A	0	-
chr12	112684899	112684900	chr12_112684899_112684900_A	0	-
chr12	112846497	112846498	chr12_112846497_112846498_T	0	-
chr12	113623966	113623967	chr12_113623966_113623967_A	0	+
chr12	113623973	113623974	chr12_113623973_113623974_A	0	+
chr12	113624467	113624468	chr12_113624467_113624468_A	0	+
chr12	113723672	113723673	chr12_113723672_113723673_A	0	+
chr12	113772693	113772694	chr12_113772693_113772694_A	0	-
chr12	113772748	113772749	chr12_113772748_113772749_A	0	-
chr12	114383758	114383759	chr12_114383758_114383759_T	0	-
chr12	114384304	114384305	chr12_114384304_114384305_C	0	-
chr12	116443828	116443829	chr12_116443828_116443829_T	0	-
chr12	116457246	116457247	chr12_116457246_116457247_T	0	-
chr12	117612167	117612168	chr12_117612167_117612168_A	0	-
chr12	118575808	118575809	chr12_118575808_118575809_T	0	+
chr12	118582365	118582366	chr12_118582365_118582366_A	0	+
chr12	118828901	118828902	chr12_118828901_118828902_C	0	+
chr12	120109280	120109281	chr12_120109280_120109281_A	0	+
chr12	120110084	120110085	chr12_120110084_120110085_A	0	+
chr12	120150694	120150695	chr12_120150694_120150695_T	0	-
chr12	120221878	120221879	chr12_120221878_120221879_A	0	-
chr12	120565812	120565813	chr12_120565812_120565813_T	0	-
chr12	120569158	120569159	chr12_120569158_120569159_C	0	-
chr12	120574562	120574563	chr12_120574562_120574563_G	0	-
chr12	120576247	120576248	chr12_120576247_120576248_C	0	-
chr12	120593587	120593588	chr12_120593587_120593588_A	0	-
chr12	120594815	120594816	chr12_120594815_120594816_T	0	-
chr12	120594817	120594818	chr12_120594817_120594818_C	0	-
chr12	120595855	120595856	chr12_120595855_120595856_T	0	-
chr12	120599887	120599888	chr12_120599887_120599888_T	0	-
chr12	120613698	120613699	chr12_120613698_120613699_A	0	-
chr12	120622077	120622078	chr12_120622077_120622078_A	0	-
chr12	120635287	120635288	chr12_120635287_120635288_A	0	-
chr12	120635292	120635293	chr12_120635292_120635293_A	0	-
chr12	120636704	120636705	chr12_120636704_120636705_G	0	-
chr12	120638655	120638656	chr12_120638655_120638656_T	0	-
chr12	120901966	120901967	chr12_120901966_120901967_A	0	-
chr12	121002849	121002850	chr12_121002849_121002850_A	0	+
chr12	121758286	121758287	chr12_121758286_121758287_A	0	-
chr12	121766328	121766329	chr12_121766328_121766329_T	0	-
chr12	121783869	121783870	chr12_121783869_121783870_T	0	-
chr12	122294559	122294560	chr12_122294559_122294560_A	0	-
chr12	122296640	122296641	chr12_122296640_122296641_C	0	-
chr12	122617868	122617869	chr12_122617868_122617869_T	0	+
chr12	122619746	122619747	chr12_122619746_122619747_T	0	+
chr12	122622718	122622719	chr12_122622718_122622719_T	0	+
chr12	122623332	122623333	chr12_122623332_122623333_C	0	+
chr12	122625484	122625485	chr12_122625484_122625485_T	0	+
chr12	122626217	122626218	chr12_122626217_122626218_T	0	+
chr12	122701134	122701135	chr12_122701134_122701135_A	0	-
chr12	122709316	122709317	chr12_122709316_122709317_G	0	-
chr12	122974032	122974033	chr12_122974032_122974033_A	0	-
chr12	123060051	123060052	chr12_123060051_123060052_T	0	+
chr12	123060323	123060324	chr12_123060323_123060324_A	0	+
chr12	123061398	123061399	chr12_123061398_123061399_T	0	+
chr12	123099987	123099988	chr12_123099987_123099988_A	0	+
chr12	123949050	123949051	chr12_123949050_123949051_A	0	+
chr12	124093204	124093205	chr12_124093204_124093205_A	0	+
chr12	124109426	124109427	chr12_124109426_124109427_A	0	-
chr12	124810156	124810157	chr12_124810156_124810157_C	0	-
chr12	124826642	124826643	chr12_124826642_124826643_A	0	-
chr12	124832884	124832885	chr12_124832884_124832885_A	0	-
chr12	124914273	124914274	chr12_124914273_124914274_A	0	-
chr12	125396728	125396729	chr12_125396728_125396729_G	0	-
chr12	125396910	125396911	chr12_125396910_125396911_C	0	-
chr12	125396926	125396927	chr12_125396926_125396927_T	0	-
chr12	125397780	125397781	chr12_125397780_125397781_G	0	-
chr12	125397813	125397814	chr12_125397813_125397814_G	0	-
chr12	125397921	125397922	chr12_125397921_125397922_G	0	-
chr12	125453219	125453220	chr12_125453219_125453220_C	0	-
chr12	125465406	125465407	chr12_125465406_125465407_T	0	-
chr12	125587513	125587514	chr12_125587513_125587514_A	0	+
chr12	12879057	12879058	chr12_12879057_12879058_A	0	+
chr12	12978902	12978903	chr12_12978902_12978903_A	0	+
chr12	131357358	131357359	chr12_131357358_131357359_T	0	+
chr12	131357359	131357360	chr12_131357359_131357360_C	0	+
chr12	132498008	132498009	chr12_132498008_132498009_A	0	+
chr12	132626782	132626783	chr12_132626782_132626783_A	0	-
chr12	132626996	132626997	chr12_132626996_132626997_A	0	-
chr12	132631802	132631803	chr12_132631802_132631803_A	0	+
chr12	133219604	133219605	chr12_133219604_133219605_T	0	-
chr12	133234043	133234044	chr12_133234043_133234044_T	0	-
chr12	133234051	133234052	chr12_133234051_133234052_A	0	-
chr12	133237771	133237772	chr12_133237771_133237772_T	0	-
chr12	133237774	133237775	chr12_133237774_133237775_T	0	-
chr12	133257309	133257310	chr12_133257309_133257310_G	0	-
chr12	133304053	133304054	chr12_133304053_133304054_A	0	-
chr12	133312120	133312121	chr12_133312120_133312121_A	0	-
chr12	133318093	133318094	chr12_133318093_133318094_A	0	-
chr12	133350933	133350934	chr12_133350933_133350934_A	0	-
chr12	133372830	133372831	chr12_133372830_133372831_C	0	-
chr12	133372839	133372840	chr12_133372839_133372840_A	0	-
chr12	16507040	16507041	chr12_16507040_16507041_A	0	+
chr12	20790010	20790011	chr12_20790010_20790011_T	0	+
chr12	21654174	21654175	chr12_21654174_21654175_T	0	-
chr12	27058497	27058498	chr12_27058497_27058498_A	0	-
chr12	27064278	27064279	chr12_27064278_27064279_T	0	-
chr12	27070397	27070398	chr12_27070397_27070398_A	0	-
chr12	2907867	2907868	chr12_2907867_2907868_A	0	+
chr12	2909536	2909537	chr12_2909536_2909537_T	0	+
chr12	2912287	2912288	chr12_2912287_2912288_A	0	+
chr12	2912290	2912291	chr12_2912290_2912291_C	0	+
chr12	2968676	2968677	chr12_2968676_2968677_T	0	+
chr12	3043586	3043587	chr12_3043586_3043587_A	0	+
chr12	30805246	30805247	chr12_30805246_30805247_A	0	-
chr12	31237487	31237488	chr12_31237487_31237488_T	0	+
chr12	31241950	31241951	chr12_31241950_31241951_T	0	+
chr12	31242305	31242306	chr12_31242305_31242306_T	0	+
chr12	31255831	31255832	chr12_31255831_31255832_T	0	+
chr12	3127684	3127685	chr12_3127684_3127685_T	0	+
chr12	3127686	3127687	chr12_3127686_3127687_A	0	+
chr12	31861861	31861862	chr12_31861861_31861862_T	0	-
chr12	32890006	32890007	chr12_32890006_32890007_A	0	+
chr12	34176868	34176869	chr12_34176868_34176869_T	0	+
chr12	34176870	34176871	chr12_34176870_34176871_T	0	+
chr12	38712034	38712035	chr12_38712034_38712035_T	0	+
chr12	39716715	39716716	chr12_39716715_39716716_C	0	-
chr12	39734931	39734932	chr12_39734931_39734932_A	0	-
chr12	44191664	44191665	chr12_44191664_44191665_A	0	-
chr12	45744417	45744418	chr12_45744417_45744418_T	0	+
chr12	46240619	46240620	chr12_46240619_46240620_A	0	+
chr12	46757810	46757811	chr12_46757810_46757811_A	0	-
chr12	46757811	46757812	chr12_46757811_46757812_A	0	-
chr12	46757812	46757813	chr12_46757812_46757813_T	0	-
chr12	46764668	46764669	chr12_46764668_46764669_A	0	-
chr12	4778881	4778882	chr12_4778881_4778882_A	0	+
chr12	48178020	48178021	chr12_48178020_48178021_T	0	-
chr12	48178031	48178032	chr12_48178031_48178032_C	0	-
chr12	48181623	48181624	chr12_48181623_48181624_T	0	-
chr12	48359582	48359583	chr12_48359582_48359583_T	0	+
chr12	48527075	48527076	chr12_48527075_48527076_C	0	+
chr12	48528475	48528476	chr12_48528475_48528476_A	0	+
chr12	48529038	48529039	chr12_48529038_48529039_T	0	+
chr12	48531473	48531474	chr12_48531473_48531474_A	0	+
chr12	49061607	49061608	chr12_49061607_49061608_T	0	-
chr12	49075455	49075456	chr12_49075455_49075456_A	0	-
chr12	49224500	49224501	chr12_49224500_49224501_T	0	-
chr12	49225999	49226000	chr12_49225999_49226000_A	0	-
chr12	49230859	49230860	chr12_49230859_49230860_A	0	-
chr12	49332926	49332927	chr12_49332926_49332927_T	0	-
chr12	49416184	49416185	chr12_49416184_49416185_C	0	-
chr12	49416290	49416291	chr12_49416290_49416291_A	0	-
chr12	49421960	49421961	chr12_49421960_49421961_T	0	-
chr12	49422765	49422766	chr12_49422765_49422766_A	0	-
chr12	49423288	49423289	chr12_49423288_49423289_T	0	-
chr12	49446517	49446518	chr12_49446517_49446518_T	0	-
chr12	49495349	49495350	chr12_49495349_49495350_T	0	-
chr12	49522284	49522285	chr12_49522284_49522285_G	0	+
chr12	49523534	49523535	chr12_49523534_49523535_A	0	-
chr12	49523535	49523536	chr12_49523535_49523536_T	0	-
chr12	49663121	49663122	chr12_49663121_49663122_A	0	+
chr12	49663573	49663574	chr12_49663573_49663574_C	0	+
chr12	49666007	49666008	chr12_49666007_49666008_A	0	+
chr12	49666011	49666012	chr12_49666011_49666012_A	0	+
chr12	49719259	49719260	chr12_49719259_49719260_T	0	+
chr12	49953336	49953337	chr12_49953336_49953337_A	0	-
chr12	49960644	49960645	chr12_49960644_49960645_A	0	-
chr12	50191197	50191198	chr12_50191197_50191198_T	0	-
chr12	50384148	50384149	chr12_50384148_50384149_A	0	-
chr12	50384610	50384611	chr12_50384610_50384611_T	0	-
chr12	50822664	50822665	chr12_50822664_50822665_A	0	+
chr12	51126114	51126115	chr12_51126114_51126115_A	0	+
chr12	51203156	51203157	chr12_51203156_51203157_A	0	+
chr12	51398714	51398715	chr12_51398714_51398715_T	0	-
chr12	51398715	51398716	chr12_51398715_51398716_G	0	-
chr12	51451785	51451786	chr12_51451785_51451786_A	0	+
chr12	51511553	51511554	chr12_51511553_51511554_A	0	-
chr12	51751277	51751278	chr12_51751277_51751278_T	0	-
chr12	52449782	52449783	chr12_52449782_52449783_A	0	+
chr12	52450817	52450818	chr12_52450817_52450818_A	0	+
chr12	52628910	52628911	chr12_52628910_52628911_T	0	+
chr12	53294493	53294494	chr12_53294493_53294494_T	0	-
chr12	53416247	53416248	chr12_53416247_53416248_T	0	+
chr12	53428365	53428366	chr12_53428365_53428366_T	0	+
chr12	53432108	53432109	chr12_53432108_53432109_T	0	+
chr12	53450766	53450767	chr12_53450766_53450767_A	0	+
chr12	53452070	53452071	chr12_53452070_53452071_T	0	+
chr12	53459778	53459779	chr12_53459778_53459779_C	0	-
chr12	53670845	53670846	chr12_53670845_53670846_A	0	+
chr12	53677812	53677813	chr12_53677812_53677813_G	0	+
chr12	53684601	53684602	chr12_53684601_53684602_A	0	+
chr12	53854769	53854770	chr12_53854769_53854770_C	0	+
chr12	53861561	53861562	chr12_53861561_53861562_A	0	+
chr12	54576437	54576438	chr12_54576437_54576438_A	0	-
chr12	54678021	54678022	chr12_54678021_54678022_A	0	+
chr12	54680712	54680713	chr12_54680712_54680713_T	0	+
chr12	54798681	54798682	chr12_54798681_54798682_C	0	-
chr12	54798701	54798702	chr12_54798701_54798702_T	0	-
chr12	56110685	56110686	chr12_56110685_56110686_C	0	+
chr12	56222527	56222528	chr12_56222527_56222528_T	0	-
chr12	56365276	56365277	chr12_56365276_56365277_T	0	+
chr12	56396304	56396305	chr12_56396304_56396305_C	0	+
chr12	56428336	56428337	chr12_56428336_56428337_A	0	+
chr12	56500753	56500754	chr12_56500753_56500754_T	0	+
chr12	56501281	56501282	chr12_56501281_56501282_T	0	+
chr12	56502984	56502985	chr12_56502984_56502985_T	0	+
chr12	56504147	56504148	chr12_56504147_56504148_A	0	+
chr12	56504148	56504149	chr12_56504148_56504149_A	0	+
chr12	56504149	56504150	chr12_56504149_56504150_A	0	+
chr12	56504150	56504151	chr12_56504150_56504151_A	0	+
chr12	56504151	56504152	chr12_56504151_56504152_A	0	+
chr12	56504152	56504153	chr12_56504152_56504153_A	0	+
chr12	56504153	56504154	chr12_56504153_56504154_A	0	+
chr12	56504154	56504155	chr12_56504154_56504155_A	0	+
chr12	56504155	56504156	chr12_56504155_56504156_A	0	+
chr12	56504156	56504157	chr12_56504156_56504157_A	0	+
chr12	56504157	56504158	chr12_56504157_56504158_A	0	+
chr12	56506570	56506571	chr12_56506570_56506571_T	0	+
chr12	56510906	56510907	chr12_56510906_56510907_T	0	+
chr12	56532090	56532091	chr12_56532090_56532091_A	0	+
chr12	56553365	56553366	chr12_56553365_56553366_C	0	+
chr12	56553732	56553733	chr12_56553732_56553733_T	0	+
chr12	56565241	56565242	chr12_56565241_56565242_A	0	-
chr12	56651168	56651169	chr12_56651168_56651169_C	0	-
chr12	56651185	56651186	chr12_56651185_56651186_T	0	-
chr12	56668960	56668961	chr12_56668960_56668961_T	0	-
chr12	56676841	56676842	chr12_56676841_56676842_A	0	-
chr12	56703693	56703694	chr12_56703693_56703694_G	0	-
chr12	56733655	56733656	chr12_56733655_56733656_A	0	+
chr12	56822222	56822223	chr12_56822222_56822223_A	0	-
chr12	56826933	56826934	chr12_56826933_56826934_T	0	-
chr12	56998105	56998106	chr12_56998105_56998106_C	0	-
chr12	57000111	57000112	chr12_57000111_57000112_C	0	-
chr12	57032238	57032239	chr12_57032238_57032239_T	0	-
chr12	57036636	57036637	chr12_57036636_57036637_C	0	-
chr12	57039160	57039161	chr12_57039160_57039161_C	0	-
chr12	57039162	57039163	chr12_57039162_57039163_T	0	-
chr12	57107001	57107002	chr12_57107001_57107002_A	0	-
chr12	57107003	57107004	chr12_57107003_57107004_T	0	-
chr12	57135634	57135635	chr12_57135634_57135635_T	0	-
chr12	57561204	57561205	chr12_57561204_57561205_A	0	+
chr12	57595244	57595245	chr12_57595244_57595245_A	0	+
chr12	57625238	57625239	chr12_57625238_57625239_C	0	+
chr12	57909676	57909677	chr12_57909676_57909677_A	0	+
chr12	57918468	57918469	chr12_57918468_57918469_T	0	+
chr12	57922703	57922704	chr12_57922703_57922704_T	0	+
chr12	57994572	57994573	chr12_57994572_57994573_T	0	+
chr12	58022769	58022770	chr12_58022769_58022770_A	0	-
chr12	58142421	58142422	chr12_58142421_58142422_T	0	-
chr12	58220210	58220211	chr12_58220210_58220211_A	0	-
chr12	58220211	58220212	chr12_58220211_58220212_G	0	-
chr12	58220212	58220213	chr12_58220212_58220213_T	0	-
chr12	62888770	62888771	chr12_62888770_62888771_A	0	+
chr12	6442338	6442339	chr12_6442338_6442339_T	0	-
chr12	64814987	64814988	chr12_64814987_64814988_A	0	+
chr12	64819574	64819575	chr12_64819574_64819575_A	0	+
chr12	6601658	6601659	chr12_6601658_6601659_C	0	-
chr12	6620250	6620251	chr12_6620250_6620251_T	0	+
chr12	6632401	6632402	chr12_6632401_6632402_A	0	+
chr12	6636911	6636912	chr12_6636911_6636912_T	0	+
chr12	6682453	6682454	chr12_6682453_6682454_C	0	-
chr12	6687100	6687101	chr12_6687100_6687101_T	0	-
chr12	6711343	6711344	chr12_6711343_6711344_C	0	-
chr12	6711344	6711345	chr12_6711344_6711345_C	0	-
chr12	69214062	69214063	chr12_69214062_69214063_A	0	+
chr12	69230433	69230434	chr12_69230433_69230434_A	0	+
chr12	69233029	69233030	chr12_69233029_69233030_A	0	+
chr12	69652324	69652325	chr12_69652324_69652325_A	0	+
chr12	6968609	6968610	chr12_6968609_6968610_A	0	+
chr12	6972328	6972329	chr12_6972328_6972329_G	0	+
chr12	6977799	6977800	chr12_6977799_6977800_G	0	+
chr12	6979191	6979192	chr12_6979191_6979192_T	0	+
chr12	6979192	6979193	chr12_6979192_6979193_A	0	+
chr12	6982203	6982204	chr12_6982203_6982204_A	0	-
chr12	69987259	69987260	chr12_69987259_69987260_G	0	+
chr12	7044686	7044687	chr12_7044686_7044687_A	0	+
chr12	7074979	7074980	chr12_7074979_7074980_C	0	-
chr12	7076423	7076424	chr12_7076423_7076424_T	0	-
chr12	7076425	7076426	chr12_7076425_7076426_C	0	-
chr12	7076519	7076520	chr12_7076519_7076520_A	0	-
chr12	7077769	7077770	chr12_7077769_7077770_C	0	-
chr12	72023513	72023514	chr12_72023513_72023514_A	0	-
chr12	72023515	72023516	chr12_72023515_72023516_T	0	-
chr12	7263785	7263786	chr12_7263785_7263786_A	0	+
chr12	7288770	7288771	chr12_7288770_7288771_C	0	+
chr12	7301547	7301548	chr12_7301547_7301548_T	0	+
chr12	7362243	7362244	chr12_7362243_7362244_A	0	+
chr12	75897884	75897885	chr12_75897884_75897885_T	0	-
chr12	76423893	76423894	chr12_76423893_76423894_A	0	-
chr12	76447156	76447157	chr12_76447156_76447157_A	0	-
chr12	76448895	76448896	chr12_76448895_76448896_A	0	-
chr12	76453687	76453688	chr12_76453687_76453688_A	0	-
chr12	80190766	80190767	chr12_80190766_80190767_A	0	-
chr12	80199596	80199597	chr12_80199596_80199597_T	0	-
chr12	8082500	8082501	chr12_8082500_8082501_T	0	-
chr12	82751074	82751075	chr12_82751074_82751075_A	0	-
chr12	8543130	8543131	chr12_8543130_8543131_C	0	-
chr12	88568344	88568345	chr12_88568344_88568345_A	0	+
chr12	88899040	88899041	chr12_88899040_88899041_A	0	-
chr12	88909419	88909420	chr12_88909419_88909420_C	0	-
chr12	93789234	93789235	chr12_93789234_93789235_A	0	+
chr12	95365295	95365296	chr12_95365295_95365296_A	0	-
chr12	95419052	95419053	chr12_95419052_95419053_A	0	-
chr12	95451675	95451676	chr12_95451675_95451676_A	0	-
chr12	95888702	95888703	chr12_95888702_95888703_A	0	+
chr12	95889759	95889760	chr12_95889759_95889760_A	0	+
chr12	98909700	98909701	chr12_98909700_98909701_A	0	+
chr12	98938700	98938701	chr12_98938700_98938701_T	0	+
chr12	98987727	98987728	chr12_98987727_98987728_T	0	+
chr12	98987728	98987729	chr12_98987728_98987729_A	0	+
chr12	98987729	98987730	chr12_98987729_98987730_A	0	+
chr12	98991601	98991602	chr12_98991601_98991602_A	0	+
chr12	98992259	98992260	chr12_98992259_98992260_A	0	+
chr13	103280170	103280171	chr13_103280170_103280171_A	0	+
chr13	103506618	103506619	chr13_103506618_103506619_A	0	+
chr13	103518579	103518580	chr13_103518579_103518580_T	0	+
chr13	103518582	103518583	chr13_103518582_103518583_A	0	+
chr13	103518589	103518590	chr13_103518589_103518590_T	0	+
chr13	107209506	107209507	chr13_107209506_107209507_T	0	-
chr13	111158732	111158733	chr13_111158732_111158733_G	0	+
chr13	111287770	111287771	chr13_111287770_111287771_T	0	+
chr13	111298482	111298483	chr13_111298482_111298483_A	0	-
chr13	111932853	111932854	chr13_111932853_111932854_A	0	+
chr13	111932862	111932863	chr13_111932862_111932863_A	0	+
chr13	113832630	113832631	chr13_113832630_113832631_T	0	-
chr13	114290824	114290825	chr13_114290824_114290825_T	0	+
chr13	114290826	114290827	chr13_114290826_114290827_T	0	+
chr13	20245945	20245946	chr13_20245945_20245946_T	0	+
chr13	21374493	21374494	chr13_21374493_21374494_T	0	-
chr13	25074546	25074547	chr13_25074546_25074547_A	0	-
chr13	25459834	25459835	chr13_25459834_25459835_T	0	-
chr13	30097661	30097662	chr13_30097661_30097662_C	0	-
chr13	31035716	31035717	chr13_31035716_31035717_A	0	-
chr13	31714467	31714468	chr13_31714467_31714468_A	0	-
chr13	37569190	37569191	chr13_37569190_37569191_A	0	-
chr13	37577043	37577044	chr13_37577043_37577044_A	0	+
chr13	37598597	37598598	chr13_37598597_37598598_T	0	-
chr13	42275690	42275691	chr13_42275690_42275691_A	0	-
chr13	45009043	45009044	chr13_45009043_45009044_T	0	-
chr13	45113062	45113063	chr13_45113062_45113063_A	0	-
chr13	46104792	46104793	chr13_46104792_46104793_A	0	+
chr13	47351779	47351780	chr13_47351779_47351780_A	0	-
chr13	48941600	48941601	chr13_48941600_48941601_A	0	+
chr13	49762622	49762623	chr13_49762622_49762623_T	0	+
chr13	53206534	53206535	chr13_53206534_53206535_A	0	+
chr13	53239739	53239740	chr13_53239739_53239740_A	0	+
chr13	60348412	60348413	chr13_60348412_60348413_A	0	-
chr13	73320604	73320605	chr13_73320604_73320605_A	0	+
chr13	73355352	73355353	chr13_73355352_73355353_T	0	-
chr13	76179841	76179842	chr13_76179841_76179842_A	0	+
chr13	77853073	77853074	chr13_77853073_77853074_A	0	-
chr13	79928727	79928728	chr13_79928727_79928728_T	0	-
chr13	95244581	95244582	chr13_95244581_95244582_T	0	-
chr13	95279241	95279242	chr13_95279241_95279242_A	0	+
chr13	95726612	95726613	chr13_95726612_95726613_T	0	-
chr13	96506750	96506751	chr13_96506750_96506751_A	0	-
chr13	96599453	96599454	chr13_96599453_96599454_A	0	-
chr13	98645118	98645119	chr13_98645118_98645119_A	0	+
chr13	98671802	98671803	chr13_98671802_98671803_T	0	+
chr13	98671807	98671808	chr13_98671807_98671808_T	0	+
chr13	99037882	99037883	chr13_99037882_99037883_A	0	+
chr14	101005694	101005695	chr14_101005694_101005695_A	0	-
chr14	102472205	102472206	chr14_102472205_102472206_A	0	+
chr14	102486197	102486198	chr14_102486197_102486198_A	0	+
chr14	102495853	102495854	chr14_102495853_102495854_A	0	+
chr14	102498563	102498564	chr14_102498563_102498564_T	0	+
chr14	102514072	102514073	chr14_102514072_102514073_A	0	+
chr14	102551508	102551509	chr14_102551508_102551509_A	0	-
chr14	102964404	102964405	chr14_102964404_102964405_A	0	+
chr14	103404771	103404772	chr14_103404771_103404772_T	0	-
chr14	103412090	103412091	chr14_103412090_103412091_A	0	-
chr14	103597361	103597362	chr14_103597361_103597362_T	0	+
chr14	103805481	103805482	chr14_103805481_103805482_A	0	+
chr14	103805948	103805949	chr14_103805948_103805949_T	0	+
chr14	104624066	104624067	chr14_104624066_104624067_A	0	+
chr14	105169416	105169417	chr14_105169416_105169417_G	0	+
chr14	105175581	105175582	chr14_105175581_105175582_T	0	+
chr14	105181595	105181596	chr14_105181595_105181596_G	0	+
chr14	105211124	105211125	chr14_105211124_105211125_G	0	+
chr14	105238818	105238819	chr14_105238818_105238819_C	0	-
chr14	105359789	105359790	chr14_105359789_105359790_A	0	+
chr14	105359831	105359832	chr14_105359831_105359832_C	0	+
chr14	105612335	105612336	chr14_105612335_105612336_T	0	-
chr14	105643384	105643385	chr14_105643384_105643385_A	0	-
chr14	105846392	105846393	chr14_105846392_105846393_T	0	+
chr14	105849652	105849653	chr14_105849652_105849653_A	0	+
chr14	105916371	105916372	chr14_105916371_105916372_G	0	+
chr14	105916372	105916373	chr14_105916372_105916373_A	0	+
chr14	20842002	20842003	chr14_20842002_20842003_A	0	-
chr14	21462105	21462106	chr14_21462105_21462106_T	0	+
chr14	21829394	21829395	chr14_21829394_21829395_T	0	-
chr14	21859244	21859245	chr14_21859244_21859245_A	0	-
chr14	21869254	21869255	chr14_21869254_21869255_A	0	-
chr14	23303353	23303354	chr14_23303353_23303354_T	0	+
chr14	23395529	23395530	chr14_23395529_23395530_A	0	-
chr14	23442798	23442799	chr14_23442798_23442799_A	0	-
chr14	23530860	23530861	chr14_23530860_23530861_T	0	-
chr14	24566078	24566079	chr14_24566078_24566079_A	0	+
chr14	24651634	24651635	chr14_24651634_24651635_C	0	-
chr14	24738402	24738403	chr14_24738402_24738403_T	0	-
chr14	24772258	24772259	chr14_24772258_24772259_A	0	+
chr14	31112490	31112491	chr14_31112490_31112491_A	0	+
chr14	31576503	31576504	chr14_31576503_31576504_A	0	-
chr14	35252460	35252461	chr14_35252460_35252461_C	0	-
chr14	35483924	35483925	chr14_35483924_35483925_A	0	+
chr14	50266421	50266422	chr14_50266421_50266422_A	0	-
chr14	51237305	51237306	chr14_51237305_51237306_A	0	-
chr14	51398530	51398531	chr14_51398530_51398531_A	0	-
chr14	53224432	53224433	chr14_53224432_53224433_A	0	+
chr14	53342105	53342106	chr14_53342105_53342106_A	0	-
chr14	56108388	56108389	chr14_56108388_56108389_A	0	+
chr14	56120244	56120245	chr14_56120244_56120245_A	0	+
chr14	56120245	56120246	chr14_56120245_56120246_A	0	+
chr14	56120247	56120248	chr14_56120247_56120248_A	0	+
chr14	56120253	56120254	chr14_56120253_56120254_A	0	+
chr14	56139620	56139621	chr14_56139620_56139621_T	0	+
chr14	57702554	57702555	chr14_57702554_57702555_A	0	-
chr14	57713602	57713603	chr14_57713602_57713603_A	0	-
chr14	57748784	57748785	chr14_57748784_57748785_A	0	+
chr14	58734114	58734115	chr14_58734114_58734115_A	0	+
chr14	58796700	58796701	chr14_58796700_58796701_A	0	+
chr14	62200829	62200830	chr14_62200829_62200830_A	0	+
chr14	64635561	64635562	chr14_64635561_64635562_T	0	+
chr14	64688257	64688258	chr14_64688257_64688258_A	0	+
chr14	64898449	64898450	chr14_64898449_64898450_A	0	+
chr14	64906819	64906820	chr14_64906819_64906820_A	0	+
chr14	64921405	64921406	chr14_64921405_64921406_T	0	+
chr14	65198777	65198778	chr14_65198777_65198778_T	0	+
chr14	65199496	65199497	chr14_65199496_65199497_T	0	+
chr14	65209675	65209676	chr14_65209675_65209676_A	0	+
chr14	65543406	65543407	chr14_65543406_65543407_A	0	-
chr14	67815841	67815842	chr14_67815841_67815842_A	0	-
chr14	69347734	69347735	chr14_69347734_69347735_T	0	-
chr14	69376143	69376144	chr14_69376143_69376144_A	0	-
chr14	69585023	69585024	chr14_69585023_69585024_T	0	-
chr14	70234819	70234820	chr14_70234819_70234820_A	0	+
chr14	70237685	70237686	chr14_70237685_70237686_T	0	+
chr14	73580965	73580966	chr14_73580965_73580966_T	0	+
chr14	73735240	73735241	chr14_73735240_73735241_C	0	+
chr14	75530291	75530292	chr14_75530291_75530292_A	0	-
chr14	76249456	76249457	chr14_76249456_76249457_T	0	+
chr14	76548931	76548932	chr14_76548931_76548932_C	0	+
chr14	77269845	77269846	chr14_77269845_77269846_T	0	-
chr14	77797387	77797388	chr14_77797387_77797388_T	0	+
chr14	89073554	89073555	chr14_89073554_89073555_A	0	+
chr14	89323518	89323519	chr14_89323518_89323519_A	0	+
chr14	91636324	91636325	chr14_91636324_91636325_A	0	+
chr14	91925243	91925244	chr14_91925243_91925244_T	0	-
chr14	91928618	91928619	chr14_91928618_91928619_A	0	-
chr14	91937366	91937367	chr14_91937366_91937367_A	0	-
chr14	92547513	92547514	chr14_92547513_92547514_A	0	-
chr14	92548830	92548831	chr14_92548830_92548831_A	0	-
chr14	97003119	97003120	chr14_97003119_97003120_A	0	+
chr14	99969029	99969030	chr14_99969029_99969030_A	0	+
chr15	100214564	100214565	chr15_100214564_100214565_A	0	+
chr15	101826033	101826034	chr15_101826033_101826034_T	0	-
chr15	101827253	101827254	chr15_101827253_101827254_A	0	-
chr15	102506253	102506254	chr15_102506253_102506254_C	0	+
chr15	102512548	102512549	chr15_102512548_102512549_A	0	+
chr15	102512586	102512587	chr15_102512586_102512587_A	0	+
chr15	102512754	102512755	chr15_102512754_102512755_A	0	+
chr15	102514081	102514082	chr15_102514081_102514082_T	0	+
chr15	102515169	102515170	chr15_102515169_102515170_T	0	+
chr15	20644401	20644402	chr15_20644401_20644402_A	0	-
chr15	20644472	20644473	chr15_20644472_20644473_C	0	-
chr15	22868812	22868813	chr15_22868812_22868813_A	0	+
chr15	22869881	22869882	chr15_22869881_22869882_A	0	+
chr15	23311863	23311864	chr15_23311863_23311864_A	0	-
chr15	23311913	23311914	chr15_23311913_23311914_A	0	-
chr15	23311975	23311976	chr15_23311975_23311976_A	0	-
chr15	25650719	25650720	chr15_25650719_25650720_A	0	-
chr15	28359977	28359978	chr15_28359977_28359978_A	0	-
chr15	28389397	28389398	chr15_28389397_28389398_A	0	-
chr15	28459557	28459558	chr15_28459557_28459558_A	0	-
chr15	29996556	29996557	chr15_29996556_29996557_A	0	-
chr15	30053510	30053511	chr15_30053510_30053511_A	0	-
chr15	31217964	31217965	chr15_31217964_31217965_A	0	+
chr15	34530638	34530639	chr15_34530638_34530639_T	0	-
chr15	34542960	34542961	chr15_34542960_34542961_T	0	-
chr15	34683486	34683487	chr15_34683486_34683487_A	0	-
chr15	39874365	39874366	chr15_39874365_39874366_T	0	+
chr15	39880240	39880241	chr15_39880240_39880241_A	0	+
chr15	39880702	39880703	chr15_39880702_39880703_T	0	+
chr15	39880703	39880704	chr15_39880703_39880704_G	0	+
chr15	39883364	39883365	chr15_39883364_39883365_T	0	+
chr15	39883365	39883366	chr15_39883365_39883366_A	0	+
chr15	40466102	40466103	chr15_40466102_40466103_A	0	+
chr15	40491795	40491796	chr15_40491795_40491796_A	0	+
chr15	40494579	40494580	chr15_40494579_40494580_T	0	+
chr15	40679329	40679330	chr15_40679329_40679330_T	0	+
chr15	40682008	40682009	chr15_40682008_40682009_C	0	+
chr15	40685616	40685617	chr15_40685616_40685617_A	0	+
chr15	40707571	40707572	chr15_40707571_40707572_C	0	+
chr15	40707572	40707573	chr15_40707572_40707573_C	0	+
chr15	40708250	40708251	chr15_40708250_40708251_G	0	+
chr15	40937824	40937825	chr15_40937824_40937825_A	0	+
chr15	40943638	40943639	chr15_40943638_40943639_A	0	+
chr15	41071541	41071542	chr15_41071541_41071542_T	0	-
chr15	41165729	41165730	chr15_41165729_41165730_T	0	-
chr15	41346246	41346247	chr15_41346246_41346247_A	0	-
chr15	41361882	41361883	chr15_41361882_41361883_A	0	-
chr15	41379902	41379903	chr15_41379902_41379903_A	0	-
chr15	41600881	41600882	chr15_41600881_41600882_A	0	+
chr15	41641275	41641276	chr15_41641275_41641276_A	0	+
chr15	41815179	41815180	chr15_41815179_41815180_A	0	-
chr15	42053915	42053916	chr15_42053915_42053916_A	0	+
chr15	42105096	42105097	chr15_42105096_42105097_A	0	+
chr15	42109084	42109085	chr15_42109084_42109085_T	0	+
chr15	42113753	42113754	chr15_42113753_42113754_C	0	+
chr15	42458454	42458455	chr15_42458454_42458455_T	0	-
chr15	42720357	42720358	chr15_42720357_42720358_G	0	-
chr15	43330103	43330104	chr15_43330103_43330104_A	0	-
chr15	43662247	43662248	chr15_43662247_43662248_A	0	-
chr15	44058901	44058902	chr15_44058901_44058902_A	0	+
chr15	44058903	44058904	chr15_44058903_44058904_A	0	+
chr15	44085882	44085883	chr15_44085882_44085883_A	0	+
chr15	44809286	44809287	chr15_44809286_44809287_A	0	-
chr15	45710728	45710729	chr15_45710728_45710729_A	0	+
chr15	48624393	48624394	chr15_48624393_48624394_A	0	+
chr15	49089945	49089946	chr15_49089945_49089946_A	0	-
chr15	49776475	49776476	chr15_49776475_49776476_A	0	+
chr15	50211177	50211178	chr15_50211177_50211178_A	0	-
chr15	50769443	50769444	chr15_50769443_50769444_A	0	+
chr15	52244283	52244284	chr15_52244283_52244284_A	0	-
chr15	52512037	52512038	chr15_52512037_52512038_A	0	-
chr15	56130406	56130407	chr15_56130406_56130407_A	0	-
chr15	59176013	59176014	chr15_59176013_59176014_A	0	-
chr15	59179762	59179763	chr15_59179762_59179763_A	0	-
chr15	59185285	59185286	chr15_59185285_59185286_T	0	-
chr15	59553882	59553883	chr15_59553882_59553883_A	0	-
chr15	60644044	60644045	chr15_60644044_60644045_T	0	-
chr15	60770304	60770305	chr15_60770304_60770305_C	0	-
chr15	63353030	63353031	chr15_63353030_63353031_A	0	+
chr15	63548678	63548679	chr15_63548678_63548679_A	0	+
chr15	63943606	63943607	chr15_63943606_63943607_A	0	-
chr15	63982874	63982875	chr15_63982874_63982875_A	0	-
chr15	64429035	64429036	chr15_64429035_64429036_T	0	+
chr15	64449130	64449131	chr15_64449130_64449131_A	0	-
chr15	65110566	65110567	chr15_65110566_65110567_T	0	-
chr15	65759184	65759185	chr15_65759184_65759185_T	0	-
chr15	65856525	65856526	chr15_65856525_65856526_A	0	+
chr15	65899811	65899812	chr15_65899811_65899812_A	0	-
chr15	66792016	66792017	chr15_66792016_66792017_T	0	-
chr15	66793465	66793466	chr15_66793465_66793466_T	0	-
chr15	66793860	66793861	chr15_66793860_66793861_A	0	-
chr15	66793873	66793874	chr15_66793873_66793874_T	0	-
chr15	66795101	66795102	chr15_66795101_66795102_G	0	-
chr15	66795102	66795103	chr15_66795102_66795103_T	0	-
chr15	66811184	66811185	chr15_66811184_66811185_A	0	+
chr15	67459091	67459092	chr15_67459091_67459092_A	0	+
chr15	68468770	68468771	chr15_68468770_68468771_T	0	+
chr15	69745958	69745959	chr15_69745958_69745959_A	0	+
chr15	69745960	69745961	chr15_69745960_69745961_G	0	+
chr15	70343833	70343834	chr15_70343833_70343834_T	0	-
chr15	70344895	70344896	chr15_70344895_70344896_A	0	-
chr15	70347046	70347047	chr15_70347046_70347047_A	0	-
chr15	72492122	72492123	chr15_72492122_72492123_C	0	-
chr15	72499243	72499244	chr15_72499243_72499244_A	0	-
chr15	72501248	72501249	chr15_72501248_72501249_T	0	-
chr15	72502216	72502217	chr15_72502216_72502217_T	0	-
chr15	72502234	72502235	chr15_72502234_72502235_C	0	-
chr15	72534581	72534582	chr15_72534581_72534582_C	0	-
chr15	72534596	72534597	chr15_72534596_72534597_C	0	-
chr15	72859423	72859424	chr15_72859423_72859424_T	0	+
chr15	74741695	74741696	chr15_74741695_74741696_A	0	-
chr15	74918115	74918116	chr15_74918115_74918116_T	0	+
chr15	75189817	75189818	chr15_75189817_75189818_T	0	+
chr15	75194429	75194430	chr15_75194429_75194430_A	0	-
chr15	75197608	75197609	chr15_75197608_75197609_A	0	-
chr15	75630963	75630964	chr15_75630963_75630964_C	0	+
chr15	75631294	75631295	chr15_75631294_75631295_A	0	+
chr15	75632016	75632017	chr15_75632016_75632017_T	0	+
chr15	75648817	75648818	chr15_75648817_75648818_C	0	-
chr15	75655131	75655132	chr15_75655131_75655132_A	0	-
chr15	75655133	75655134	chr15_75655133_75655134_T	0	-
chr15	76165744	76165745	chr15_76165744_76165745_C	0	+
chr15	77770606	77770607	chr15_77770606_77770607_G	0	+
chr15	78765558	78765559	chr15_78765558_78765559_A	0	+
chr15	78837946	78837947	chr15_78837946_78837947_A	0	+
chr15	79186366	79186367	chr15_79186366_79186367_A	0	+
chr15	79187157	79187158	chr15_79187157_79187158_A	0	+
chr15	82725727	82725728	chr15_82725727_82725728_C	0	+
chr15	82822814	82822815	chr15_82822814_82822815_T	0	-
chr15	82824566	82824567	chr15_82824566_82824567_G	0	-
chr15	83102252	83102253	chr15_83102252_83102253_C	0	+
chr15	83207157	83207158	chr15_83207157_83207158_T	0	-
chr15	83208909	83208910	chr15_83208909_83208910_G	0	-
chr15	84871793	84871794	chr15_84871793_84871794_A	0	-
chr15	85224091	85224092	chr15_85224091_85224092_A	0	-
chr15	85333905	85333906	chr15_85333905_85333906_A	0	+
chr15	85343042	85343043	chr15_85343042_85343043_T	0	+
chr15	85343047	85343048	chr15_85343047_85343048_T	0	+
chr15	85659179	85659180	chr15_85659179_85659180_A	0	+
chr15	85750870	85750871	chr15_85750870_85750871_A	0	-
chr15	86261211	86261212	chr15_86261211_86261212_T	0	+
chr15	89173266	89173267	chr15_89173266_89173267_A	0	+
chr15	89790831	89790832	chr15_89790831_89790832_A	0	+
chr15	89804785	89804786	chr15_89804785_89804786_T	0	+
chr15	89826334	89826335	chr15_89826334_89826335_A	0	+
chr15	89844512	89844513	chr15_89844512_89844513_C	0	+
chr15	89872372	89872373	chr15_89872372_89872373_C	0	-
chr15	89877171	89877172	chr15_89877171_89877172_A	0	-
chr15	90431892	90431893	chr15_90431892_90431893_G	0	-
chr15	90760975	90760976	chr15_90760975_90760976_C	0	+
chr15	90774481	90774482	chr15_90774481_90774482_C	0	-
chr15	91019866	91019867	chr15_91019866_91019867_T	0	+
chr15	91037926	91037927	chr15_91037926_91037927_A	0	+
chr15	91184310	91184311	chr15_91184310_91184311_G	0	+
chr15	91449938	91449939	chr15_91449938_91449939_A	0	+
chr15	91503532	91503533	chr15_91503532_91503533_T	0	+
chr15	91517984	91517985	chr15_91517984_91517985_A	0	-
chr15	93444373	93444374	chr15_93444373_93444374_A	0	+
chr15	93486049	93486050	chr15_93486049_93486050_A	0	+
chr15	93489017	93489018	chr15_93489017_93489018_A	0	+
chr15	99790030	99790031	chr15_99790030_99790031_A	0	-
chr16	10625455	10625456	chr16_10625455_10625456_G	0	+
chr16	11846717	11846718	chr16_11846717_11846718_A	0	-
chr16	11940735	11940736	chr16_11940735_11940736_T	0	-
chr16	11990663	11990664	chr16_11990663_11990664_A	0	-
chr16	12002469	12002470	chr16_12002469_12002470_A	0	+
chr16	14346188	14346189	chr16_14346188_14346189_A	0	+
chr16	1500685	1500686	chr16_1500685_1500686_A	0	-
chr16	15015833	15015834	chr16_15015833_15015834_G	0	+
chr16	15015835	15015836	chr16_15015835_15015836_A	0	+
chr16	15019565	15019566	chr16_15019565_15019566_G	0	+
chr16	15021033	15021034	chr16_15021033_15021034_A	0	+
chr16	15026401	15026402	chr16_15026401_15026402_T	0	+
chr16	15026404	15026405	chr16_15026404_15026405_C	0	+
chr16	1510976	1510977	chr16_1510976_1510977_T	0	-
chr16	15123775	15123776	chr16_15123775_15123776_A	0	+
chr16	15128113	15128114	chr16_15128113_15128114_A	0	+
chr16	15129279	15129280	chr16_15129279_15129280_C	0	+
chr16	15129285	15129286	chr16_15129285_15129286_A	0	+
chr16	15199837	15199838	chr16_15199837_15199838_A	0	-
chr16	15199855	15199856	chr16_15199855_15199856_A	0	-
chr16	15222268	15222269	chr16_15222268_15222269_C	0	-
chr16	15222271	15222272	chr16_15222271_15222272_T	0	-
chr16	1557281	1557282	chr16_1557281_1557282_T	0	+
chr16	16149929	16149930	chr16_16149929_16149930_A	0	+
chr16	1636300	1636301	chr16_1636300_1636301_A	0	-
chr16	16414484	16414485	chr16_16414484_16414485_G	0	+
chr16	16414486	16414487	chr16_16414486_16414487_A	0	+
chr16	16418216	16418217	chr16_16418216_16418217_G	0	+
chr16	16419684	16419685	chr16_16419684_16419685_A	0	+
chr16	16422486	16422487	chr16_16422486_16422487_G	0	+
chr16	16424888	16424889	chr16_16424888_16424889_T	0	+
chr16	16424891	16424892	chr16_16424891_16424892_C	0	+
chr16	177003	177004	chr16_177003_177004_A	0	+
chr16	1798213	1798214	chr16_1798213_1798214_T	0	+
chr16	1837650	1837651	chr16_1837650_1837651_A	0	+
chr16	18431435	18431436	chr16_18431435_18431436_C	0	-
chr16	18431438	18431439	chr16_18431438_18431439_T	0	-
chr16	18436695	18436696	chr16_18436695_18436696_A	0	-
chr16	18438163	18438164	chr16_18438163_18438164_G	0	-
chr16	18471537	18471538	chr16_18471537_18471538_C	0	-
chr16	18471540	18471541	chr16_18471540_18471541_T	0	-
chr16	1869247	1869248	chr16_1869247_1869248_A	0	-
chr16	18806921	18806922	chr16_18806921_18806922_A	0	-
chr16	18848785	18848786	chr16_18848785_18848786_A	0	-
chr16	18879702	18879703	chr16_18879702_18879703_T	0	-
chr16	18880060	18880061	chr16_18880060_18880061_A	0	-
chr16	2012300	2012301	chr16_2012300_2012301_T	0	-
chr16	2012790	2012791	chr16_2012790_2012791_G	0	-
chr16	2012929	2012930	chr16_2012929_2012930_T	0	-
chr16	2049150	2049151	chr16_2049150_2049151_T	0	-
chr16	2050509	2050510	chr16_2050509_2050510_T	0	-
chr16	2051215	2051216	chr16_2051215_2051216_T	0	-
chr16	2053162	2053163	chr16_2053162_2053163_T	0	-
chr16	2115495	2115496	chr16_2115495_2115496_T	0	+
chr16	2122179	2122180	chr16_2122179_2122180_T	0	+
chr16	2133673	2133674	chr16_2133673_2133674_A	0	+
chr16	2134929	2134930	chr16_2134929_2134930_C	0	+
chr16	2136165	2136166	chr16_2136165_2136166_C	0	+
chr16	21464421	21464422	chr16_21464421_21464422_A	0	-
chr16	2152991	2152992	chr16_2152991_2152992_G	0	-
chr16	2156972	2156973	chr16_2156972_2156973_G	0	-
chr16	2221233	2221234	chr16_2221233_2221234_G	0	+
chr16	22261944	22261945	chr16_22261944_22261945_A	0	+
chr16	22268942	22268943	chr16_22268942_22268943_A	0	+
chr16	22359170	22359171	chr16_22359170_22359171_A	0	-
chr16	22472062	22472063	chr16_22472062_22472063_A	0	+
chr16	22497123	22497124	chr16_22497123_22497124_A	0	+
chr16	2283811	2283812	chr16_2283811_2283812_A	0	+
chr16	2283859	2283860	chr16_2283859_2283860_G	0	+
chr16	2312453	2312454	chr16_2312453_2312454_C	0	-
chr16	2327696	2327697	chr16_2327696_2327697_A	0	-
chr16	23563647	23563648	chr16_23563647_23563648_A	0	-
chr16	23569243	23569244	chr16_23569243_23569244_A	0	+
chr16	23598671	23598672	chr16_23598671_23598672_A	0	-
chr16	23691375	23691376	chr16_23691375_23691376_C	0	+
chr16	23700532	23700533	chr16_23700532_23700533_T	0	+
chr16	24816907	24816908	chr16_24816907_24816908_T	0	+
chr16	24826435	24826436	chr16_24826435_24826436_C	0	+
chr16	24834167	24834168	chr16_24834167_24834168_A	0	+
chr16	24834717	24834718	chr16_24834717_24834718_T	0	+
chr16	2514005	2514006	chr16_2514005_2514006_C	0	+
chr16	2579441	2579442	chr16_2579441_2579442_C	0	+
chr16	27492544	27492545	chr16_27492544_27492545_A	0	-
chr16	27788226	27788227	chr16_27788226_27788227_A	0	+
chr16	2808958	2808959	chr16_2808958_2808959_T	0	+
chr16	28401730	28401731	chr16_28401730_28401731_G	0	-
chr16	28620215	28620216	chr16_28620215_28620216_G	0	-
chr16	2870925	2870926	chr16_2870925_2870926_T	0	+
chr16	28736213	28736214	chr16_28736213_28736214_G	0	+
chr16	28841177	28841178	chr16_28841177_28841178_G	0	+
chr16	28880503	28880504	chr16_28880503_28880504_A	0	+
chr16	2946326	2946327	chr16_2946326_2946327_T	0	+
chr16	29466696	29466697	chr16_29466696_29466697_A	0	+
chr16	29498744	29498745	chr16_29498744_29498745_T	0	-
chr16	29810178	29810179	chr16_29810178_29810179_A	0	+
chr16	29810180	29810181	chr16_29810180_29810181_A	0	+
chr16	29810259	29810260	chr16_29810259_29810260_A	0	+
chr16	29810268	29810269	chr16_29810268_29810269_T	0	+
chr16	29811201	29811202	chr16_29811201_29811202_C	0	+
chr16	29883071	29883072	chr16_29883071_29883072_T	0	-
chr16	29989385	29989386	chr16_29989385_29989386_A	0	+
chr16	29993158	29993159	chr16_29993158_29993159_C	0	+
chr16	30080480	30080481	chr16_30080480_30080481_G	0	+
chr16	30080603	30080604	chr16_30080603_30080604_T	0	+
[truncated: 3,013 more rows]

## Sheet: Match+Deletion
Chromosome	Start	Stop	ID	Score	Strand
chr1	100547538	100547539	chr1_100547538_100547539_A	0	+
chr1	101362088	101362089	chr1_101362088_101362089_A	0	+
chr1	101440684	101440685	chr1_101440684_101440685_A	0	+
chr1	104077920	104077921	chr1_104077920_104077921_A	0	+
chr1	10511396	10511397	chr1_10511396_10511397_A	0	+
chr1	10523291	10523292	chr1_10523291_10523292_A	0	-
chr1	109172182	109172183	chr1_109172182_109172183_A	0	+
chr1	109191636	109191637	chr1_109191636_109191637_A	0	-
chr1	109525437	109525438	chr1_109525437_109525438_C	0	-
chr1	109771998	109771999	chr1_109771998_109771999_A	0	+
chr1	109778555	109778556	chr1_109778555_109778556_A	0	+
chr1	109779830	109779831	chr1_109779830_109779831_A	0	+
chr1	109801034	109801035	chr1_109801034_109801035_A	0	+
chr1	109808331	109808332	chr1_109808331_109808332_A	0	+
chr1	109954586	109954587	chr1_109954586_109954587_A	0	-
chr1	110553796	110553797	chr1_110553796_110553797_A	0	+
chr1	110560968	110560969	chr1_110560968_110560969_C	0	+
chr1	110581773	110581774	chr1_110581773_110581774_A	0	+
chr1	110590374	110590375	chr1_110590374_110590375_A	0	+
chr1	11076160	11076161	chr1_11076160_11076161_A	0	+
chr1	11080456	11080457	chr1_11080456_11080457_A	0	+
chr1	111491061	111491062	chr1_111491061_111491062_A	0	-
chr1	11181445	11181446	chr1_11181445_11181446_A	0	-
chr1	11189040	11189041	chr1_11189040_11189041_A	0	-
chr1	11189915	11189916	chr1_11189915_11189916_A	0	-
chr1	111984034	111984035	chr1_111984034_111984035_C	0	-
chr1	111990257	111990258	chr1_111990257_111990258_A	0	-
chr1	111991445	111991446	chr1_111991445_111991446_A	0	-
chr1	112003511	112003512	chr1_112003511_112003512_A	0	+
chr1	11308188	11308189	chr1_11308188_11308189_A	0	-
chr1	113197062	113197063	chr1_113197062_113197063_A	0	+
chr1	113234250	113234251	chr1_113234250_113234251_A	0	+
chr1	114391299	114391300	chr1_114391299_114391300_A	0	-
chr1	115250842	115250843	chr1_115250842_115250843_A	0	-
chr1	1153090	1153091	chr1_1153090_1153091_A	0	-
chr1	116936115	116936116	chr1_116936115_116936116_A	0	+
chr1	117618780	117618781	chr1_117618780_117618781_T	0	+
chr1	117633907	117633908	chr1_117633907_117633908_G	0	+
chr1	11854164	11854165	chr1_11854164_11854165_A	0	-
chr1	11888129	11888130	chr1_11888129_11888130_G	0	+
chr1	11895994	11895995	chr1_11895994_11895995_A	0	+
chr1	120462265	120462266	chr1_120462265_120462266_A	0	-
chr1	120468469	120468470	chr1_120468469_120468470_A	0	-
chr1	12056191	12056192	chr1_12056191_12056192_A	0	+
chr1	12402929	12402930	chr1_12402929_12402930_G	0	+
chr1	12402933	12402934	chr1_12402933_12402934_A	0	+
chr1	12406635	12406636	chr1_12406635_12406636_A	0	+
chr1	1246685	1246686	chr1_1246685_1246686_A	0	+
chr1	1249320	1249321	chr1_1249320_1249321_A	0	-
chr1	1249767	1249768	chr1_1249767_1249768_C	0	-
chr1	1250364	1250365	chr1_1250364_1250365_A	0	-
chr1	1309849	1309850	chr1_1309849_1309850_G	0	-
chr1	1326269	1326270	chr1_1326269_1326270_A	0	-
chr1	1421882	1421883	chr1_1421882_1421883_A	0	+
chr1	1423207	1423208	chr1_1423207_1423208_A	0	+
chr1	144164488	144164489	chr1_144164488_144164489_T	0	+
chr1	144169221	144169222	chr1_144169221_144169222_T	0	+
chr1	144173073	144173074	chr1_144173073_144173074_T	0	+
chr1	144176264	144176265	chr1_144176264_144176265_T	0	+
chr1	144183557	144183558	chr1_144183557_144183558_T	0	+
chr1	144193067	144193068	chr1_144193067_144193068_T	0	+
chr1	144197837	144197838	chr1_144197837_144197838_T	0	+
chr1	144205786	144205787	chr1_144205786_144205787_T	0	+
chr1	144220097	144220098	chr1_144220097_144220098_T	0	+
chr1	144614734	144614735	chr1_144614734_144614735_T	0	+
chr1	144823094	144823095	chr1_144823094_144823095_A	0	+
chr1	144825431	144825432	chr1_144825431_144825432_G	0	+
chr1	144917657	144917658	chr1_144917657_144917658_A	0	-
chr1	145314121	145314122	chr1_145314121_145314122_A	0	+
chr1	145318841	145318842	chr1_145318841_145318842_A	0	+
chr1	145323559	145323560	chr1_145323559_145323560_A	0	+
chr1	145350424	145350425	chr1_145350424_145350425_T	0	+
chr1	145354268	145354269	chr1_145354268_145354269_T	0	+
chr1	145355156	145355157	chr1_145355156_145355157_T	0	+
chr1	145359876	145359877	chr1_145359876_145359877_T	0	+
chr1	145608319	145608320	chr1_145608319_145608320_A	0	-
chr1	145803409	145803410	chr1_145803409_145803410_T	0	-
chr1	145884832	145884833	chr1_145884832_145884833_T	0	+
chr1	1460584	1460585	chr1_1460584_1460585_A	0	+
chr1	146412636	146412637	chr1_146412636_146412637_A	0	+
chr1	146420880	146420881	chr1_146420880_146420881_T	0	+
chr1	146425645	146425646	chr1_146425645_146425646_T	0	+
chr1	146430410	146430411	chr1_146430410_146430411_T	0	+
chr1	146435175	146435176	chr1_146435175_146435176_T	0	+
chr1	146435176	146435177	chr1_146435176_146435177_A	0	+
chr1	146443015	146443016	chr1_146443015_146443016_T	0	+
chr1	146446155	146446156	chr1_146446155_146446156_T	0	+
chr1	146457220	146457221	chr1_146457220_146457221_T	0	+
chr1	146460354	146460355	chr1_146460354_146460355_T	0	+
chr1	146461980	146461981	chr1_146461980_146461981_T	0	+
chr1	146461981	146461982	chr1_146461981_146461982_A	0	+
chr1	146728163	146728164	chr1_146728163_146728164_C	0	+
chr1	146740419	146740420	chr1_146740419_146740420_A	0	+
chr1	147426531	147426532	chr1_147426531_147426532_T	0	+
chr1	147580076	147580077	chr1_147580076_147580077_T	0	-
chr1	148010193	148010194	chr1_148010193_148010194_T	0	-
chr1	148014934	148014935	chr1_148014934_148014935_T	0	-
chr1	148016492	148016493	chr1_148016492_148016493_A	0	-
chr1	148256002	148256003	chr1_148256002_148256003_T	0	-
chr1	148260766	148260767	chr1_148260766_148260767_T	0	-
chr1	148265526	148265527	chr1_148265526_148265527_T	0	-
chr1	148275062	148275063	chr1_148275062_148275063_T	0	-
chr1	148313247	148313248	chr1_148313247_148313248_T	0	-
chr1	148322767	148322768	chr1_148322767_148322768_T	0	-
chr1	148327529	148327530	chr1_148327529_148327530_T	0	-
chr1	148577252	148577253	chr1_148577252_148577253_T	0	+
chr1	148588960	148588961	chr1_148588960_148588961_A	0	+
chr1	148590522	148590523	chr1_148590522_148590523_T	0	+
chr1	148751004	148751005	chr1_148751004_148751005_A	0	+
chr1	148752570	148752571	chr1_148752570_148752571_T	0	+
chr1	149899217	149899218	chr1_149899217_149899218_C	0	-
chr1	150266693	150266694	chr1_150266693_150266694_A	0	+
chr1	150266716	150266717	chr1_150266716_150266717_C	0	+
chr1	150432505	150432506	chr1_150432505_150432506_A	0	+
chr1	150469258	150469259	chr1_150469258_150469259_A	0	+
chr1	150529081	150529082	chr1_150529081_150529082_A	0	+
chr1	150939145	150939146	chr1_150939145_150939146_A	0	-
chr1	151111229	151111230	chr1_151111229_151111230_A	0	-
chr1	151115178	151115179	chr1_151115178_151115179_C	0	-
chr1	151204699	151204700	chr1_151204699_151204700_G	0	+
chr1	151212401	151212402	chr1_151212401_151212402_A	0	+
chr1	151337202	151337203	chr1_151337202_151337203_A	0	-
chr1	151337301	151337302	chr1_151337301_151337302_A	0	-
chr1	151341682	151341683	chr1_151341682_151341683_C	0	-
chr1	151379134	151379135	chr1_151379134_151379135_A	0	-
chr1	153507855	153507856	chr1_153507855_153507856_A	0	-
chr1	153636978	153636979	chr1_153636978_153636979_A	0	-
chr1	153637837	153637838	chr1_153637837_153637838_A	0	-
chr1	153735172	153735173	chr1_153735172_153735173_A	0	+
chr1	153736565	153736566	chr1_153736565_153736566_A	0	+
chr1	153750606	153750607	chr1_153750606_153750607_A	0	+
chr1	153791418	153791419	chr1_153791418_153791419_A	0	-
chr1	153904938	153904939	chr1_153904938_153904939_C	0	-
chr1	153949546	153949547	chr1_153949546_153949547_A	0	-
chr1	154148752	154148753	chr1_154148752_154148753_C	0	-
chr1	154148786	154148787	chr1_154148786_154148787_A	0	-
chr1	154201065	154201066	chr1_154201065_154201066_A	0	+
chr1	154228133	154228134	chr1_154228133_154228134_A	0	+
chr1	154232392	154232393	chr1_154232392_154232393_A	0	+
chr1	154318673	154318674	chr1_154318673_154318674_A	0	+
chr1	154321284	154321285	chr1_154321284_154321285_A	0	+
chr1	154528042	154528043	chr1_154528042_154528043_A	0	-
chr1	154557860	154557861	chr1_154557860_154557861_A	0	-
chr1	154561984	154561985	chr1_154561984_154561985_A	0	-
chr1	154574818	154574819	chr1_154574818_154574819_G	0	-
chr1	154940779	154940780	chr1_154940779_154940780_G	0	-
chr1	154962008	154962009	chr1_154962008_154962009_A	0	+
chr1	155028242	155028243	chr1_155028242_155028243_A	0	+
chr1	155174644	155174645	chr1_155174644_155174645_G	0	-
chr1	155231546	155231547	chr1_155231546_155231547_A	0	-
chr1	155279812	155279813	chr1_155279812_155279813_A	0	+
chr1	155707924	155707925	chr1_155707924_155707925_A	0	+
chr1	155896647	155896648	chr1_155896647_155896648_T	0	-
chr1	155899185	155899186	chr1_155899185_155899186_T	0	-
chr1	155899187	155899188	chr1_155899187_155899188_A	0	-
chr1	155917836	155917837	chr1_155917836_155917837_A	0	-
chr1	155936312	155936313	chr1_155936312_155936313_G	0	-
chr1	156084652	156084653	chr1_156084652_156084653_G	0	+
chr1	156216573	156216574	chr1_156216573_156216574_A	0	-
chr1	156220830	156220831	chr1_156220830_156220831_A	0	-
chr1	156222888	156222889	chr1_156222888_156222889_A	0	-
chr1	156230437	156230438	chr1_156230437_156230438_A	0	-
chr1	156452449	156452450	chr1_156452449_156452450_A	0	-
chr1	156452456	156452457	chr1_156452456_156452457_G	0	-
chr1	156518566	156518567	chr1_156518566_156518567_A	0	-
chr1	156565663	156565664	chr1_156565663_156565664_G	0	-
chr1	156708616	156708617	chr1_156708616_156708617_A	0	-
chr1	156756353	156756354	chr1_156756353_156756354_C	0	+
chr1	156911813	156911814	chr1_156911813_156911814_A	0	-
chr1	156914247	156914248	chr1_156914247_156914248_A	0	-
chr1	156914251	156914252	chr1_156914251_156914252_A	0	-
chr1	158059183	158059184	chr1_158059183_158059184_A	0	+
chr1	15986295	15986296	chr1_15986295_15986296_A	0	+
chr1	160260497	160260498	chr1_160260497_160260498_A	0	-
chr1	160260500	160260501	chr1_160260500_160260501_C	0	-
chr1	160261310	160261311	chr1_160261310_160261311_A	0	-
chr1	160310109	160310110	chr1_160310109_160310110_A	0	-
chr1	16054542	16054543	chr1_16054542_16054543_A	0	+
chr1	16058357	16058358	chr1_16058357_16058358_C	0	+
chr1	1607053	1607054	chr1_1607053_1607054_G	0	-
chr1	161012054	161012055	chr1_161012054_161012055_A	0	-
chr1	161012489	161012490	chr1_161012489_161012490_A	0	-
chr1	161093758	161093759	chr1_161093758_161093759_A	0	-
chr1	161134402	161134403	chr1_161134402_161134403_A	0	+
chr1	161173203	161173204	chr1_161173203_161173204_A	0	+
chr1	161179469	161179470	chr1_161179469_161179470_A	0	+
chr1	161183626	161183627	chr1_161183626_161183627_A	0	+
chr1	16202666	16202667	chr1_16202666_16202667_A	0	+
chr1	1634746	1634747	chr1_1634746_1634747_A	0	-
chr1	1637192	1637193	chr1_1637192_1637193_C	0	-
chr1	16456085	16456086	chr1_16456085_16456086_A	0	-
chr1	165737540	165737541	chr1_165737540_165737541_A	0	-
chr1	1669911	1669912	chr1_1669911_1669912_G	0	-
chr1	168153992	168153993	chr1_168153992_168153993_A	0	+
chr1	16894557	16894558	chr1_16894557_16894558_A	0	-
chr1	16953807	16953808	chr1_16953807_16953808_A	0	-
chr1	169775119	169775120	chr1_169775119_169775120_A	0	+
chr1	171482121	171482122	chr1_171482121_171482122_A	0	+
chr1	171557492	171557493	chr1_171557492_171557493_T	0	+
chr1	172560098	172560099	chr1_172560098_172560099_A	0	+
chr1	17281209	17281210	chr1_17281209_17281210_A	0	+
chr1	17354402	17354403	chr1_17354402_17354403_A	0	-
chr1	173833462	173833463	chr1_173833462_173833463_A	0	-
chr1	173834607	173834608	chr1_173834607_173834608_G	0	-
chr1	173835032	173835033	chr1_173835032_173835033_G	0	-
chr1	173835207	173835208	chr1_173835207_173835208_T	0	-
chr1	173835515	173835516	chr1_173835515_173835516_G	0	-
chr1	173835962	173835963	chr1_173835962_173835963_T	0	-
chr1	173910541	173910542	chr1_173910541_173910542_A	0	-
chr1	173916755	173916756	chr1_173916755_173916756_A	0	-
chr1	173952070	173952071	chr1_173952070_173952071_A	0	-
chr1	175996871	175996872	chr1_175996871_175996872_A	0	-
chr1	176012424	176012425	chr1_176012424_176012425_A	0	-
chr1	17735716	17735717	chr1_17735716_17735717_A	0	-
chr1	17752204	17752205	chr1_17752204_17752205_A	0	-
chr1	179033032	179033033	chr1_179033032_179033033_A	0	+
chr1	182827215	182827216	chr1_182827215_182827216_A	0	+
chr1	182827224	182827225	chr1_182827224_182827225_A	0	+
chr1	182847136	182847137	chr1_182847136_182847137_A	0	+
chr1	182848352	182848353	chr1_182848352_182848353_A	0	+
chr1	182848353	182848354	chr1_182848353_182848354_G	0	+
chr1	182849609	182849610	chr1_182849609_182849610_A	0	+
chr1	183520929	183520930	chr1_183520929_183520930_A	0	+
chr1	185274800	185274801	chr1_185274800_185274801_A	0	-
chr1	185275793	185275794	chr1_185275793_185275794_A	0	-
chr1	186302552	186302553	chr1_186302552_186302553_A	0	-
chr1	186342628	186342629	chr1_186342628_186342629_A	0	-
chr1	193051289	193051290	chr1_193051289_193051290_A	0	+
chr1	193218823	193218824	chr1_193218823_193218824_A	0	+
chr1	19403429	19403430	chr1_19403429_19403430_A	0	-
chr1	19431712	19431713	chr1_19431712_19431713_A	0	-
chr1	19445480	19445481	chr1_19445480_19445481_A	0	-
chr1	19454847	19454848	chr1_19454847_19454848_A	0	-
chr1	19470606	19470607	chr1_19470606_19470607_A	0	-
chr1	19480456	19480457	chr1_19480456_19480457_T	0	-
chr1	19481597	19481598	chr1_19481597_19481598_A	0	-
chr1	19487663	19487664	chr1_19487663_19487664_A	0	-
chr1	19488407	19488408	chr1_19488407_19488408_A	0	-
chr1	19489130	19489131	chr1_19489130_19489131_A	0	-
chr1	19490961	19490962	chr1_19490961_19490962_A	0	-
chr1	19525201	19525202	chr1_19525201_19525202_C	0	-
chr1	19525203	19525204	chr1_19525203_19525204_A	0	-
chr1	19565380	19565381	chr1_19565380_19565381_A	0	-
chr1	19567664	19567665	chr1_19567664_19567665_A	0	-
chr1	19583918	19583919	chr1_19583918_19583919_A	0	+
chr1	19584305	19584306	chr1_19584305_19584306_A	0	+
chr1	198701402	198701403	chr1_198701402_198701403_A	0	+
chr1	201185544	201185545	chr1_201185544_201185545_A	0	+
chr1	201824051	201824052	chr1_201824051_201824052_A	0	+
chr1	201845042	201845043	chr1_201845042_201845043_A	0	+
chr1	202117851	202117852	chr1_202117851_202117852_A	0	-
chr1	202727660	202727661	chr1_202727660_202727661_A	0	-
chr1	202913101	202913102	chr1_202913101_202913102_A	0	-
chr1	203672751	203672752	chr1_203672751_203672752_A	0	+
chr1	203765393	203765394	chr1_203765393_203765394_A	0	+
chr1	204400936	204400937	chr1_204400936_204400937_A	0	-
chr1	204403100	204403101	chr1_204403100_204403101_A	0	-
chr1	204423942	204423943	chr1_204423942_204423943_T	0	-
chr1	205068256	205068257	chr1_205068256_205068257_A	0	-
chr1	205138984	205138985	chr1_205138984_205138985_A	0	-
chr1	205766168	205766169	chr1_205766168_205766169_A	0	-
chr1	206652247	206652248	chr1_206652247_206652248_A	0	+
chr1	210008397	210008398	chr1_210008397_210008398_A	0	+
chr1	2106172	2106173	chr1_2106172_2106173_A	0	+
chr1	211486734	211486735	chr1_211486734_211486735_C	0	+
chr1	212583895	212583896	chr1_212583895_212583896_A	0	-
chr1	214832169	214832170	chr1_214832169_214832170_A	0	+
chr1	214832171	214832172	chr1_214832171_214832172_A	0	+
chr1	21560178	21560179	chr1_21560178_21560179_A	0	-
chr1	215793369	215793370	chr1_215793369_215793370_A	0	+
chr1	218478335	218478336	chr1_218478335_218478336_A	0	+
chr1	21940221	21940222	chr1_21940221_21940222_A	0	-
chr1	220089322	220089323	chr1_220089322_220089323_A	0	-
chr1	220152085	220152086	chr1_220152085_220152086_A	0	-
chr1	220191875	220191876	chr1_220191875_220191876_A	0	-
chr1	22030144	22030145	chr1_22030144_22030145_A	0	-
chr1	220313491	220313492	chr1_220313491_220313492_A	0	+
chr1	22166076	22166077	chr1_22166076_22166077_A	0	-
chr1	22169961	22169962	chr1_22169961_22169962_A	0	-
chr1	22174026	22174027	chr1_22174026_22174027_C	0	-
chr1	222826316	222826317	chr1_222826316_222826317_A	0	+
chr1	223164835	223164836	chr1_223164835_223164836_A	0	+
chr1	223936720	223936721	chr1_223936720_223936721_G	0	+
chr1	223949859	223949860	chr1_223949859_223949860_A	0	+
chr1	223976898	223976899	chr1_223976898_223976899_A	0	-
chr1	224455860	224455861	chr1_224455860_224455861_A	0	-
chr1	224492545	224492546	chr1_224492545_224492546_A	0	-
chr1	224606160	224606161	chr1_224606160_224606161_A	0	-
chr1	226340345	226340346	chr1_226340345_226340346_A	0	-
chr1	227921769	227921770	chr1_227921769_227921770_A	0	-
chr1	227946662	227946663	chr1_227946662_227946663_A	0	+
chr1	228285531	228285532	chr1_228285531_228285532_A	0	+
chr1	228336341	228336342	chr1_228336341_228336342_A	0	+
chr1	22834459	22834460	chr1_22834459_22834460_A	0	+
chr1	228506562	228506563	chr1_228506562_228506563_A	0	+
chr1	228521259	228521260	chr1_228521259_228521260_A	0	+
chr1	228554070	228554071	chr1_228554070_228554071_A	0	+
chr1	228563688	228563689	chr1_228563688_228563689_A	0	+
chr1	228584898	228584899	chr1_228584898_228584899_A	0	-
chr1	228681524	228681525	chr1_228681524_228681525_A	0	+
chr1	229654193	229654194	chr1_229654193_229654194_A	0	-
chr1	230819294	230819295	chr1_230819294_230819295_A	0	+
chr1	230825701	230825702	chr1_230825701_230825702_A	0	+
chr1	231362600	231362601	chr1_231362600_231362601_A	0	-
chr1	235490309	235490310	chr1_235490309_235490310_A	0	-
chr1	235599670	235599671	chr1_235599670_235599671_T	0	+
chr1	23645205	23645206	chr1_23645205_23645206_A	0	-
chr1	236721860	236721861	chr1_236721860_236721861_A	0	-
chr1	237026731	237026732	chr1_237026731_237026732_A	0	+
chr1	23847588	23847589	chr1_23847588_23847589_A	0	-
chr1	24020239	24020240	chr1_24020239_24020240_A	0	+
chr1	24021127	24021128	chr1_24021127_24021128_A	0	+
chr1	24113741	24113742	chr1_24113741_24113742_A	0	+
chr1	242024691	242024692	chr1_242024691_242024692_A	0	+
chr1	243434255	243434256	chr1_243434255_243434256_A	0	+
chr1	244855143	244855144	chr1_244855143_244855144_A	0	+
chr1	245010032	245010033	chr1_245010032_245010033_A	0	-
chr1	245019481	245019482	chr1_245019481_245019482_A	0	-
chr1	2452367	2452368	chr1_2452367_2452368_A	0	-
chr1	247050675	247050676	chr1_247050675_247050676_A	0	-
chr1	247051561	247051562	chr1_247051561_247051562_T	0	-
chr1	24779871	24779872	chr1_24779871_24779872_A	0	+
chr1	249210778	249210779	chr1_249210778_249210779_A	0	+
chr1	24973135	24973136	chr1_24973135_24973136_A	0	+
chr1	24975316	24975317	chr1_24975316_24975317_A	0	+
chr1	24979379	24979380	chr1_24979379_24979380_A	0	+
chr1	24995592	24995593	chr1_24995592_24995593_A	0	+
chr1	24998646	24998647	chr1_24998646_24998647_A	0	+
chr1	25549949	25549950	chr1_25549949_25549950_A	0	-
chr1	25554745	25554746	chr1_25554745_25554746_A	0	-
chr1	25569216	25569217	chr1_25569216_25569217_A	0	-
chr1	25570735	25570736	chr1_25570735_25570736_A	0	-
chr1	25881330	25881331	chr1_25881330_25881331_G	0	+
chr1	26137923	26137924	chr1_26137923_26137924_A	0	+
chr1	26496880	26496881	chr1_26496880_26496881_A	0	+
chr1	26586045	26586046	chr1_26586045_26586046_A	0	+
chr1	26863381	26863382	chr1_26863381_26863382_A	0	+
chr1	26873653	26873654	chr1_26873653_26873654_C	0	+
chr1	26881056	26881057	chr1_26881056_26881057_A	0	+
chr1	26883461	26883462	chr1_26883461_26883462_G	0	+
chr1	27094244	27094245	chr1_27094244_27094245_G	0	+
chr1	27177607	27177608	chr1_27177607_27177608_A	0	+
chr1	27180215	27180216	chr1_27180215_27180216_G	0	+
chr1	27620985	27620986	chr1_27620985_27620986_A	0	+
chr1	27632657	27632658	chr1_27632657_27632658_A	0	+
chr1	27688378	27688379	chr1_27688378_27688379_A	0	-
chr1	27736730	27736731	chr1_27736730_27736731_A	0	-
chr1	27744943	27744944	chr1_27744943_27744944_A	0	-
chr1	28203075	28203076	chr1_28203075_28203076_A	0	+
chr1	28218786	28218787	chr1_28218786_28218787_G	0	-
chr1	28326581	28326582	chr1_28326581_28326582_A	0	-
chr1	28819501	28819502	chr1_28819501_28819502_A	0	+
chr1	28858650	28858651	chr1_28858650_28858651_A	0	+
chr1	28863236	28863237	chr1_28863236_28863237_A	0	+
chr1	28906515	28906516	chr1_28906515_28906516_A	0	-
chr1	28907184	28907185	chr1_28907184_28907185_G	0	-
chr1	28907774	28907775	chr1_28907774_28907775_A	0	-
chr1	29391454	29391455	chr1_29391454_29391455_A	0	+
chr1	29522796	29522797	chr1_29522796_29522797_A	0	-
chr1	31898602	31898603	chr1_31898602_31898603_A	0	+
chr1	32098264	32098265	chr1_32098264_32098265_C	0	-
chr1	32204558	32204559	chr1_32204558_32204559_A	0	-
chr1	32508101	32508102	chr1_32508101_32508102_A	0	+
chr1	32627945	32627946	chr1_32627945_32627946_A	0	+
chr1	32659634	32659635	chr1_32659634_32659635_A	0	+
chr1	32694526	32694527	chr1_32694526_32694527_A	0	+
chr1	32843907	32843908	chr1_32843907_32843908_A	0	-
chr1	32844464	32844465	chr1_32844464_32844465_A	0	-
chr1	35650334	35650335	chr1_35650334_35650335_C	0	-
chr1	35657153	35657154	chr1_35657153_35657154_A	0	-
chr1	35907958	35907959	chr1_35907958_35907959_A	0	-
chr1	35916139	35916140	chr1_35916139_35916140_A	0	-
chr1	36028773	36028774	chr1_36028773_36028774_A	0	+
chr1	36029343	36029344	chr1_36029343_36029344_A	0	+
chr1	36359611	36359612	chr1_36359611_36359612_G	0	+
chr1	36379756	36379757	chr1_36379756_36379757_A	0	+
chr1	36384622	36384623	chr1_36384622_36384623_A	0	+
chr1	36384630	36384631	chr1_36384630_36384631_A	0	+
chr1	36492692	36492693	chr1_36492692_36492693_A	0	+
chr1	3653145	3653146	chr1_3653145_3653146_C	0	-
chr1	36605450	36605451	chr1_36605450_36605451_A	0	-
chr1	36643993	36643994	chr1_36643993_36643994_A	0	+
chr1	36767118	36767119	chr1_36767118_36767119_A	0	+
chr1	36769373	36769374	chr1_36769373_36769374_A	0	+
chr1	36773960	36773961	chr1_36773960_36773961_A	0	+
chr1	36814445	36814446	chr1_36814445_36814446_A	0	-
chr1	36824013	36824014	chr1_36824013_36824014_G	0	-
chr1	3700388	3700389	chr1_3700388_3700389_A	0	-
chr1	3732107	3732108	chr1_3732107_3732108_A	0	-
chr1	37947173	37947174	chr1_37947173_37947174_T	0	+
chr1	38168901	38168902	chr1_38168901_38168902_G	0	+
chr1	38269828	38269829	chr1_38269828_38269829_A	0	-
chr1	38272914	38272915	chr1_38272914_38272915_A	0	-
chr1	38344015	38344016	chr1_38344015_38344016_A	0	-
chr1	38423960	38423961	chr1_38423960_38423961_A	0	-
chr1	38449991	38449992	chr1_38449991_38449992_A	0	-
chr1	38450471	38450472	chr1_38450471_38450472_A	0	-
chr1	38453391	38453392	chr1_38453391_38453392_A	0	-
chr1	39332694	39332695	chr1_39332694_39332695_A	0	-
chr1	39802827	39802828	chr1_39802827_39802828_A	0	+
chr1	39815109	39815110	chr1_39815109_39815110_A	0	+
chr1	39906875	39906876	chr1_39906875_39906876_A	0	+
chr1	39917803	39917804	chr1_39917803_39917804_A	0	+
chr1	39917810	39917811	chr1_39917810_39917811_C	0	+
chr1	39920547	39920548	chr1_39920547_39920548_G	0	+
chr1	39924720	39924721	chr1_39924720_39924721_C	0	+
chr1	40027477	40027478	chr1_40027477_40027478_A	0	-
chr1	40874290	40874291	chr1_40874290_40874291_A	0	+
chr1	40878646	40878647	chr1_40878646_40878647_A	0	+
chr1	41189323	41189324	chr1_41189323_41189324_A	0	+
chr1	41213164	41213165	chr1_41213164_41213165_A	0	+
chr1	42654624	42654625	chr1_42654624_42654625_A	0	-
chr1	43240850	43240851	chr1_43240850_43240851_A	0	+
chr1	43637344	43637345	chr1_43637344_43637345_A	0	-
chr1	43882183	43882184	chr1_43882183_43882184_G	0	+
chr1	44070551	44070552	chr1_44070551_44070552_G	0	+
chr1	44163488	44163489	chr1_44163488_44163489_A	0	+
chr1	44290377	44290378	chr1_44290377_44290378_A	0	+
chr1	44432578	44432579	chr1_44432578_44432579_A	0	+
chr1	45101680	45101681	chr1_45101680_45101681_A	0	+
chr1	45219359	45219360	chr1_45219359_45219360_A	0	+
chr1	45219373	45219374	chr1_45219373_45219374_T	0	+
chr1	45223205	45223206	chr1_45223205_45223206_A	0	+
chr1	45224848	45224849	chr1_45224848_45224849_C	0	+
chr1	45241683	45241684	chr1_45241683_45241684_C	0	+
chr1	45471570	45471571	chr1_45471570_45471571_A	0	-
chr1	45973854	45973855	chr1_45973854_45973855_A	0	+
chr1	46032214	46032215	chr1_46032214_46032215_A	0	+
chr1	46034768	46034769	chr1_46034768_46034769_T	0	+
chr1	46078822	46078823	chr1_46078822_46078823_A	0	+
chr1	46124835	46124836	chr1_46124835_46124836_A	0	-
chr1	46488548	46488549	chr1_46488548_46488549_A	0	+
chr1	46488552	46488553	chr1_46488552_46488553_A	0	+
chr1	46488870	46488871	chr1_46488870_46488871_A	0	+
chr1	46488875	46488876	chr1_46488875_46488876_T	0	+
chr1	46488885	46488886	chr1_46488885_46488886_C	0	+
chr1	46495096	46495097	chr1_46495096_46495097_C	0	+
chr1	46662785	46662786	chr1_46662785_46662786_C	0	-
chr1	46724331	46724332	chr1_46724331_46724332_A	0	+
chr1	46739271	46739272	chr1_46739271_46739272_A	0	+
chr1	51439542	51439543	chr1_51439542_51439543_A	0	+
chr1	52237715	52237716	chr1_52237715_52237716_A	0	+
chr1	52257359	52257360	chr1_52257359_52257360_C	0	-
chr1	52272613	52272614	chr1_52272613_52272614_A	0	-
chr1	52279782	52279783	chr1_52279782_52279783_A	0	-
chr1	52821551	52821552	chr1_52821551_52821552_A	0	-
chr1	52855014	52855015	chr1_52855014_52855015_A	0	-
chr1	52911700	52911701	chr1_52911700_52911701_A	0	-
chr1	53728259	53728260	chr1_53728259_53728260_A	0	-
chr1	54284778	54284779	chr1_54284778_54284779_A	0	-
chr1	54640519	54640520	chr1_54640519_54640520_A	0	-
chr1	54692864	54692865	chr1_54692864_54692865_A	0	-
chr1	55193995	55193996	chr1_55193995_55193996_A	0	+
chr1	55318080	55318081	chr1_55318080_55318081_A	0	-
chr1	55518292	55518293	chr1_55518292_55518293_T	0	+
chr1	55522980	55522981	chr1_55522980_55522981_C	0	+
chr1	55527025	55527026	chr1_55527025_55527026_A	0	+
chr1	55543002	55543003	chr1_55543002_55543003_A	0	-
chr1	55545381	55545382	chr1_55545381_55545382_A	0	-
chr1	55563785	55563786	chr1_55563785_55563786_T	0	-
chr1	55573127	55573128	chr1_55573127_55573128_A	0	-
chr1	55589298	55589299	chr1_55589298_55589299_A	0	-
chr1	55604413	55604414	chr1_55604413_55604414_A	0	-
chr1	55620169	55620170	chr1_55620169_55620170_A	0	-
chr1	59126925	59126926	chr1_59126925_59126926_A	0	-
chr1	59134389	59134390	chr1_59134389_59134390_A	0	-
chr1	6027451	6027452	chr1_6027451_6027452_A	0	-
chr1	6272271	6272272	chr1_6272271_6272272_A	0	+
chr1	63999101	63999102	chr1_63999101_63999102_A	0	+
chr1	6531192	6531193	chr1_6531192_6531193_A	0	-
chr1	6592163	6592164	chr1_6592163_6592164_T	0	-
chr1	6646627	6646628	chr1_6646627_6646628_C	0	+
chr1	6697590	6697591	chr1_6697590_6697591_G	0	-
chr1	70646918	70646919	chr1_70646918_70646919_A	0	-
chr1	70701157	70701158	chr1_70701157_70701158_A	0	+
chr1	76254825	76254826	chr1_76254825_76254826_A	0	+
chr1	76256106	76256107	chr1_76256106_76256107_A	0	+
chr1	76256941	76256942	chr1_76256941_76256942_G	0	+
chr1	78046777	78046778	chr1_78046777_78046778_A	0	-
chr1	78421053	78421054	chr1_78421053_78421054_A	0	-
chr1	881941	881942	chr1_881941_881942_A	0	-
chr1	891621	891622	chr1_891621_891622_A	0	-
chr1	8926595	8926596	chr1_8926595_8926596_A	0	-
chr1	8927355	8927356	chr1_8927355_8927356_G	0	-
chr1	90470535	90470536	chr1_90470535_90470536_A	0	+
chr1	92754720	92754721	chr1_92754720_92754721_A	0	-
chr1	94335525	94335526	chr1_94335525_94335526_A	0	-
chr1	94336372	94336373	chr1_94336372_94336373_A	0	-
chr1	9670538	9670539	chr1_9670538_9670539_A	0	+
chr1	9791477	9791478	chr1_9791477_9791478_C	0	-
chr1	9791479	9791480	chr1_9791479_9791480_A	0	-
chr10	101371242	101371243	chr10_101371242_101371243_A	0	-
chr10	101934046	101934047	chr10_101934046_101934047_A	0	-
chr10	101995549	101995550	chr10_101995549_101995550_A	0	-
chr10	102107795	102107796	chr10_102107795_102107796_A	0	+
chr10	102289285	102289286	chr10_102289285_102289286_A	0	-
chr10	102307823	102307824	chr10_102307823_102307824_G	0	+
chr10	102741325	102741326	chr10_102741325_102741326_A	0	-
chr10	103573392	103573393	chr10_103573392_103573393_A	0	-
chr10	103869469	103869470	chr10_103869469_103869470_T	0	-
chr10	103898347	103898348	chr10_103898347_103898348_G	0	+
chr10	103898349	103898350	chr10_103898349_103898350_A	0	+
chr10	103908098	103908099	chr10_103908098_103908099_A	0	+
chr10	103919623	103919624	chr10_103919623_103919624_A	0	+
chr10	104245527	104245528	chr10_104245527_104245528_G	0	-
chr10	104248053	104248054	chr10_104248053_104248054_A	0	-
chr10	104849689	104849690	chr10_104849689_104849690_G	0	-
chr10	105155815	105155816	chr10_105155815_105155816_A	0	-
chr10	105165716	105165717	chr10_105165716_105165717_T	0	+
chr10	105205101	105205102	chr10_105205101_105205102_A	0	+
chr10	1089356	1089357	chr10_1089356_1089357_A	0	-
chr10	112039649	112039650	chr10_112039649_112039650_A	0	+
chr10	112650268	112650269	chr10_112650268_112650269_A	0	+
chr10	112650292	112650293	chr10_112650292_112650293_A	0	+
chr10	11523954	11523955	chr10_11523954_11523955_A	0	-
chr10	116203944	116203945	chr10_116203944_116203945_A	0	-
chr10	11797219	11797220	chr10_11797219_11797220_G	0	+
chr10	120095185	120095186	chr10_120095185_120095186_A	0	-
chr10	120445711	120445712	chr10_120445711_120445712_T	0	-
chr10	120796846	120796847	chr10_120796846_120796847_T	0	-
chr10	120809624	120809625	chr10_120809624_120809625_A	0	-
chr10	120820868	120820869	chr10_120820868_120820869_A	0	-
chr10	120920504	120920505	chr10_120920504_120920505_A	0	-
chr10	121347783	121347784	chr10_121347783_121347784_A	0	-
chr10	121607255	121607256	chr10_121607255_121607256_A	0	-
chr10	122626055	122626056	chr10_122626055_122626056_A	0	+
chr10	122626072	122626073	chr10_122626072_122626073_A	0	+
chr10	12279063	12279064	chr10_12279063_12279064_A	0	+
chr10	127413860	127413861	chr10_127413860_127413861_A	0	+
chr10	127430760	127430761	chr10_127430760_127430761_A	0	+
chr10	12858224	12858225	chr10_12858224_12858225_C	0	+
chr10	129924048	129924049	chr10_129924048_129924049_T	0	-
chr10	133754065	133754066	chr10_133754065_133754066_A	0	+
chr10	133786662	133786663	chr10_133786662_133786663_A	0	-
chr10	135123260	135123261	chr10_135123260_135123261_A	0	+
chr10	135204701	135204702	chr10_135204701_135204702_G	0	+
chr10	135209655	135209656	chr10_135209655_135209656_A	0	+
chr10	135212995	135212996	chr10_135212995_135212996_A	0	+
chr10	13736074	13736075	chr10_13736074_13736075_C	0	-
chr10	14938813	14938814	chr10_14938813_14938814_A	0	+
chr10	14943105	14943106	chr10_14943105_14943106_A	0	+
chr10	17746937	17746938	chr10_17746937_17746938_T	0	+
chr10	22856845	22856846	chr10_22856845_22856846_A	0	-
chr10	27406688	27406689	chr10_27406688_27406689_A	0	-
chr10	27423077	27423078	chr10_27423077_27423078_A	0	-
chr10	3174548	3174549	chr10_3174548_3174549_A	0	+
chr10	32327783	32327784	chr10_32327783_32327784_G	0	-
chr10	43892059	43892060	chr10_43892059_43892060_A	0	-
chr10	46224284	46224285	chr10_46224284_46224285_A	0	+
chr10	46383787	46383788	chr10_46383787_46383788_A	0	-
chr10	49628172	49628173	chr10_49628172_49628173_A	0	+
chr10	50952825	50952826	chr10_50952825_50952826_T	0	-
chr10	51065528	51065529	chr10_51065528_51065529_A	0	-
chr10	51287255	51287256	chr10_51287255_51287256_A	0	-
chr10	51381733	51381734	chr10_51381733_51381734_A	0	+
chr10	51381752	51381753	chr10_51381752_51381753_A	0	+
chr10	51580535	51580536	chr10_51580535_51580536_A	0	+
chr10	51586238	51586239	chr10_51586238_51586239_A	0	+
chr10	51586246	51586247	chr10_51586246_51586247_A	0	+
chr10	51612996	51612997	chr10_51612996_51612997_A	0	-
chr10	51613015	51613016	chr10_51613015_51613016_A	0	-
chr10	51829281	51829282	chr10_51829281_51829282_A	0	+
chr10	52087111	52087112	chr10_52087111_52087112_A	0	-
chr10	5766363	5766364	chr10_5766363_5766364_A	0	+
chr10	5808626	5808627	chr10_5808626_5808627_A	0	-
chr10	5958173	5958174	chr10_5958173_5958174_T	0	+
chr10	6155986	6155987	chr10_6155986_6155987_A	0	+
chr10	62544433	62544434	chr10_62544433_62544434_C	0	+
chr10	69675997	69675998	chr10_69675997_69675998_A	0	+
chr10	70139303	70139304	chr10_70139303_70139304_A	0	-
chr10	70728706	70728707	chr10_70728706_70728707_A	0	+
chr10	70733281	70733282	chr10_70733281_70733282_A	0	+
chr10	71921514	71921515	chr10_71921514_71921515_A	0	-
chr10	71973365	71973366	chr10_71973365_71973366_A	0	-
chr10	73046418	73046419	chr10_73046418_73046419_A	0	+
chr10	73585377	73585378	chr10_73585377_73585378_A	0	-
chr10	73822945	73822946	chr10_73822945_73822946_A	0	-
chr10	74103301	74103302	chr10_74103301_74103302_A	0	-
chr10	74906141	74906142	chr10_74906141_74906142_A	0	-
chr10	74908187	74908188	chr10_74908187_74908188_A	0	-
chr10	75011800	75011801	chr10_75011800_75011801_A	0	-
chr10	75011959	75011960	chr10_75011959_75011960_A	0	-
chr10	75148199	75148200	chr10_75148199_75148200_A	0	-
chr10	75549687	75549688	chr10_75549687_75549688_C	0	+
chr10	75583862	75583863	chr10_75583862_75583863_A	0	-
chr10	75830696	75830697	chr10_75830696_75830697_A	0	+
chr10	75830709	75830710	chr10_75830709_75830710_A	0	+
chr10	75834475	75834476	chr10_75834475_75834476_A	0	+
chr10	75849750	75849751	chr10_75849750_75849751_A	0	+
chr10	76995148	76995149	chr10_76995148_76995149_A	0	-
chr10	7841714	7841715	chr10_7841714_7841715_A	0	+
chr10	79579797	79579798	chr10_79579797_79579798_A	0	-
chr10	79769458	79769459	chr10_79769458_79769459_A	0	-
chr10	79784505	79784506	chr10_79784505_79784506_A	0	-
chr10	81064882	81064883	chr10_81064882_81064883_A	0	+
chr10	81111222	81111223	chr10_81111222_81111223_A	0	+
chr10	81112003	81112004	chr10_81112003_81112004_C	0	+
chr10	82266959	82266960	chr10_82266959_82266960_C	0	+
chr10	85911995	85911996	chr10_85911995_85911996_A	0	+
chr10	88197799	88197800	chr10_88197799_88197800_A	0	-
chr10	88230880	88230881	chr10_88230880_88230881_A	0	-
chr10	91477157	91477158	chr10_91477157_91477158_A	0	+
chr10	930472	930473	chr10_930472_930473_A	0	-
chr10	93773403	93773404	chr10_93773403_93773404_A	0	+
chr10	93786859	93786860	chr10_93786859_93786860_G	0	+
chr10	93841289	93841290	chr10_93841289_93841290_A	0	-
chr10	94266302	94266303	chr10_94266302_94266303_A	0	-
chr10	94389901	94389902	chr10_94389901_94389902_A	0	+
chr10	96997898	96997899	chr10_96997898_96997899_A	0	-
chr10	97388267	97388268	chr10_97388267_97388268_A	0	-
chr10	97442972	97442973	chr10_97442972_97442973_A	0	-
chr10	98312840	98312841	chr10_98312840_98312841_A	0	-
chr10	99132977	99132978	chr10_99132977_99132978_A	0	-
chr10	99215387	99215388	chr10_99215387_99215388_C	0	+
chr10	99511128	99511129	chr10_99511128_99511129_A	0	+
chr11	102219137	102219138	chr11_102219137_102219138_A	0	+
chr11	102248196	102248197	chr11_102248196_102248197_A	0	+
chr11	102960068	102960069	chr11_102960068_102960069_A	0	-
chr11	105880862	105880863	chr11_105880862_105880863_A	0	-
chr11	10784957	10784958	chr11_10784957_10784958_A	0	+
chr11	107968336	107968337	chr11_107968336_107968337_A	0	+
chr11	108061255	108061256	chr11_108061255_108061256_A	0	-
chr11	108124523	108124524	chr11_108124523_108124524_A	0	+
chr11	10823350	10823351	chr11_10823350_10823351_C	0	-
chr11	111591163	111591164	chr11_111591163_111591164_A	0	+
chr11	111957055	111957056	chr11_111957055_111957056_A	0	-
chr11	113629450	113629451	chr11_113629450_113629451_A	0	-
chr11	116744383	116744384	chr11_116744383_116744384_A	0	-
chr11	117053200	117053201	chr11_117053200_117053201_A	0	+
chr11	117077899	117077900	chr11_117077899_117077900_A	0	-
chr11	117279572	117279573	chr11_117279572_117279573_A	0	+
chr11	117282479	117282480	chr11_117282479_117282480_C	0	+
chr11	118261341	118261342	chr11_118261341_118261342_A	0	+
chr11	118360478	118360479	chr11_118360478_118360479_A	0	+
chr11	118369053	118369054	chr11_118369053_118369054_G	0	+
chr11	118371671	118371672	chr11_118371671_118371672_A	0	+
chr11	118770939	118770940	chr11_118770939_118770940_A	0	-
chr11	118885989	118885990	chr11_118885989_118885990_A	0	+
chr11	118926575	118926576	chr11_118926575_118926576_A	0	-
chr11	118926916	118926917	chr11_118926916_118926917_A	0	-
chr11	119002521	119002522	chr11_119002521_119002522_A	0	+
chr11	11919112	11919113	chr11_11919112_11919113_A	0	+
chr11	119993783	119993784	chr11_119993783_119993784_A	0	-
chr11	120302422	120302423	chr11_120302422_120302423_A	0	+
chr11	122928648	122928649	chr11_122928648_122928649_A	0	-
chr11	122929557	122929558	chr11_122929557_122929558_T	0	-
chr11	122931534	122931535	chr11_122931534_122931535_A	0	-
chr11	123610754	123610755	chr11_123610754_123610755_T	0	-
chr11	124496348	124496349	chr11_124496348_124496349_A	0	+
chr11	124496769	124496770	chr11_124496769_124496770_A	0	+
chr11	12539966	12539967	chr11_12539966_12539967_A	0	+
chr11	125484194	125484195	chr11_125484194_125484195_A	0	+
chr11	126110682	126110683	chr11_126110682_126110683_A	0	+
chr11	126142836	126142837	chr11_126142836_126142837_A	0	+
chr11	128933941	128933942	chr11_128933941_128933942_A	0	-
chr11	12902527	12902528	chr11_12902527_12902528_A	0	+
chr11	129744497	129744498	chr11_129744497_129744498_A	0	-
chr11	129751775	129751776	chr11_129751775_129751776_A	0	-
chr11	129763087	129763088	chr11_129763087_129763088_T	0	-
chr11	13398157	13398158	chr11_13398157_13398158_A	0	+
chr11	134027985	134027986	chr11_134027985_134027986_A	0	-
chr11	134038973	134038974	chr11_134038973_134038974_C	0	-
chr11	13408118	13408119	chr11_13408118_13408119_A	0	+
chr11	134126955	134126956	chr11_134126955_134126956_A	0	+
chr11	14479451	14479452	chr11_14479451_14479452_A	0	-
chr11	14899874	14899875	chr11_14899874_14899875_A	0	-
chr11	1491736	1491737	chr11_1491736_1491737_A	0	-
chr11	18373845	18373846	chr11_18373845_18373846_A	0	+
chr11	19259685	19259686	chr11_19259685_19259686_A	0	-
chr11	20136113	20136114	chr11_20136113_20136114_T	0	+
chr11	20409543	20409544	chr11_20409543_20409544_A	0	+
chr11	28112308	28112309	chr11_28112308_28112309_A	0	-
chr11	31392234	31392235	chr11_31392234_31392235_A	0	+
chr11	32410744	32410745	chr11_32410744_32410745_A	0	-
chr11	32976815	32976816	chr11_32976815_32976816_A	0	+
chr11	33886382	33886383	chr11_33886382_33886383_A	0	-
chr11	34129734	34129735	chr11_34129734_34129735_A	0	+
chr11	34156673	34156674	chr11_34156673_34156674_A	0	+
chr11	34158153	34158154	chr11_34158153_34158154_G	0	+
chr11	3712749	3712750	chr11_3712749_3712750_A	0	-
chr11	43352036	43352037	chr11_43352036_43352037_A	0	+
chr11	43923002	43923003	chr11_43923002_43923003_A	0	+
chr11	44257809	44257810	chr11_44257809_44257810_A	0	+
chr11	46403819	46403820	chr11_46403819_46403820_A	0	+
chr11	46671704	46671705	chr11_46671704_46671705_A	0	+
chr11	46677754	46677755	chr11_46677754_46677755_A	0	+
chr11	46772193	46772194	chr11_46772193_46772194_A	0	-
chr11	46786834	46786835	chr11_46786834_46786835_A	0	-
chr11	46800179	46800180	chr11_46800179_46800180_T	0	-
chr11	47182989	47182990	chr11_47182989_47182990_C	0	+
chr11	47187088	47187089	chr11_47187088_47187089_G	0	-
chr11	47193911	47193912	chr11_47193911_47193912_A	0	-
chr11	47201161	47201162	chr11_47201161_47201162_A	0	-
chr11	47269713	47269714	chr11_47269713_47269714_A	0	-
chr11	47297418	47297419	chr11_47297418_47297419_A	0	+
chr11	47317023	47317024	chr11_47317023_47317024_A	0	+
chr11	47317427	47317428	chr11_47317427_47317428_C	0	+
chr11	47593000	47593001	chr11_47593000_47593001_A	0	+
chr11	47652664	47652665	chr11_47652664_47652665_A	0	-
chr11	47744896	47744897	chr11_47744896_47744897_A	0	-
chr11	47753790	47753791	chr11_47753790_47753791_G	0	-
chr11	47800771	47800772	chr11_47800771_47800772_A	0	-
chr11	47810191	47810192	chr11_47810191_47810192_A	0	-
chr11	500017	500018	chr11_500017_500018_A	0	-
chr11	5263517	5263518	chr11_5263517_5263518_A	0	-
chr11	57067599	57067600	chr11_57067599_57067600_C	0	-
chr11	57188639	57188640	chr11_57188639_57188640_A	0	-
chr11	57193849	57193850	chr11_57193849_57193850_A	0	-
chr11	57471599	57471600	chr11_57471599_57471600_A	0	-
chr11	57558813	57558814	chr11_57558813_57558814_A	0	+
chr11	57575600	57575601	chr11_57575600_57575601_A	0	+
chr11	59421569	59421570	chr11_59421569_59421570_A	0	-
chr11	605570	605571	chr11_605570_605571_A	0	+
chr11	61077456	61077457	chr11_61077456_61077457_A	0	-
chr11	61110774	61110775	chr11_61110774_61110775_C	0	+
chr11	61556732	61556733	chr11_61556732_61556733_A	0	-
chr11	61645708	61645709	chr11_61645708_61645709_C	0	-
chr11	62159515	62159516	chr11_62159515_62159516_A	0	+
chr11	62363838	62363839	chr11_62363838_62363839_A	0	-
chr11	62384301	62384302	chr11_62384301_62384302_A	0	-
chr11	62397183	62397184	chr11_62397183_62397184_A	0	-
chr11	62397490	62397491	chr11_62397490_62397491_A	0	-
chr11	62458930	62458931	chr11_62458930_62458931_A	0	-
chr11	62491921	62491922	chr11_62491921_62491922_A	0	-
chr11	62533103	62533104	chr11_62533103_62533104_A	0	+
chr11	62601435	62601436	chr11_62601435_62601436_A	0	-
chr11	62606977	62606978	chr11_62606977_62606978_G	0	-
chr11	62620281	62620282	chr11_62620281_62620282_G	0	-
chr11	62649939	62649940	chr11_62649939_62649940_A	0	+
chr11	63992463	63992464	chr11_63992463_63992464_T	0	-
chr11	64022675	64022676	chr11_64022675_64022676_A	0	+
chr11	64519567	64519568	chr11_64519567_64519568_A	0	-
chr11	64534748	64534749	chr11_64534748_64534749_A	0	-
chr11	64535334	64535335	chr11_64535334_64535335_A	0	-
chr11	64535342	64535343	chr11_64535342_64535343_A	0	-
chr11	64535804	64535805	chr11_64535804_64535805_A	0	-
chr11	64570157	64570158	chr11_64570157_64570158_C	0	-
chr11	64577624	64577625	chr11_64577624_64577625_C	0	-
chr11	64888539	64888540	chr11_64888539_64888540_T	0	-
chr11	64940629	64940630	chr11_64940629_64940630_A	0	+
chr11	64975498	64975499	chr11_64975498_64975499_A	0	+
chr11	65191077	65191078	chr11_65191077_65191078_A	0	+
chr11	65294229	65294230	chr11_65294229_65294230_A	0	+
chr11	65314411	65314412	chr11_65314411_65314412_T	0	-
chr11	65351690	65351691	chr11_65351690_65351691_A	0	+
chr11	65351943	65351944	chr11_65351943_65351944_A	0	+
chr11	65357943	65357944	chr11_65357943_65357944_A	0	+
chr11	65384920	65384921	chr11_65384920_65384921_A	0	+
chr11	65388281	65388282	chr11_65388281_65388282_G	0	+
chr11	65427287	65427288	chr11_65427287_65427288_A	0	-
chr11	65629884	65629885	chr11_65629884_65629885_C	0	+
chr11	65632160	65632161	chr11_65632160_65632161_A	0	+
chr11	65732541	65732542	chr11_65732541_65732542_A	0	+
chr11	65766891	65766892	chr11_65766891_65766892_A	0	-
chr11	65771062	65771063	chr11_65771062_65771063_A	0	+
chr11	65820472	65820473	chr11_65820472_65820473_A	0	+
chr11	6584893	6584894	chr11_6584893_6584894_C	0	+
chr11	66030261	66030262	chr11_66030261_66030262_A	0	+
chr11	66034318	66034319	chr11_66034318_66034319_A	0	+
chr11	66136169	66136170	chr11_66136169_66136170_C	0	-
chr11	6622861	6622862	chr11_6622861_6622862_A	0	-
chr11	6632705	6632706	chr11_6632705_6632706_A	0	-
chr11	66616863	66616864	chr11_66616863_66616864_G	0	-
chr11	66617965	66617966	chr11_66617965_66617966_A	0	-
chr11	66639655	66639656	chr11_66639655_66639656_A	0	-
chr11	67017527	67017528	chr11_67017527_67017528_G	0	+
chr11	6703667	6703668	chr11_6703667_6703668_T	0	-
chr11	67051159	67051160	chr11_67051159_67051160_A	0	+
chr11	67052293	67052294	chr11_67052293_67052294_A	0	+
chr11	67254455	67254456	chr11_67254455_67254456_G	0	+
chr11	67259790	67259791	chr11_67259790_67259791_A	0	-
chr11	67817106	67817107	chr11_67817106_67817107_G	0	+
chr11	68207214	68207215	chr11_68207214_68207215_A	0	+
chr11	68318560	68318561	chr11_68318560_68318561_A	0	+
chr11	68367788	68367789	chr11_68367788_68367789_A	0	+
chr11	68370786	68370787	chr11_68370786_68370787_A	0	+
chr11	68665507	68665508	chr11_68665507_68665508_A	0	-
chr11	68701908	68701909	chr11_68701908_68701909_A	0	+
chr11	68703669	68703670	chr11_68703669_68703670_A	0	+
chr11	68703682	68703683	chr11_68703682_68703683_A	0	+
chr11	6964733	6964734	chr11_6964733_6964734_A	0	+
chr11	70184458	70184459	chr11_70184458_70184459_A	0	+
chr11	70194273	70194274	chr11_70194273_70194274_A	0	+
chr11	70202231	70202232	chr11_70202231_70202232_G	0	+
chr11	70253380	70253381	chr11_70253380_70253381_A	0	+
chr11	71191191	71191192	chr11_71191191_71191192_A	0	+
chr11	71715407	71715408	chr11_71715407_71715408_T	0	-
chr11	71715417	71715418	chr11_71715417_71715418_A	0	-
chr11	71720450	71720451	chr11_71720450_71720451_A	0	-
chr11	71733485	71733486	chr11_71733485_71733486_T	0	-
chr11	71939752	71939753	chr11_71939752_71939753_A	0	+
chr11	71944458	71944459	chr11_71944458_71944459_A	0	+
chr11	71946695	71946696	chr11_71946695_71946696_A	0	+
chr11	72004682	72004683	chr11_72004682_72004683_A	0	-
chr11	72005201	72005202	chr11_72005201_72005202_A	0	-
chr11	722072	722073	chr11_722072_722073_A	0	+
chr11	72290668	72290669	chr11_72290668_72290669_C	0	-
chr11	72295389	72295390	chr11_72295389_72295390_A	0	-
chr11	72295391	72295392	chr11_72295391_72295392_C	0	-
chr11	72404007	72404008	chr11_72404007_72404008_A	0	-
chr11	73072096	73072097	chr11_73072096_73072097_A	0	+
chr11	73074775	73074776	chr11_73074775_73074776_A	0	+
chr11	73715076	73715077	chr11_73715076_73715077_A	0	-
chr11	75277336	75277337	chr11_75277336_75277337_A	0	+
chr11	764265	764266	chr11_764265_764266_A	0	+
chr11	771129	771130	chr11_771129_771130_A	0	-
chr11	77404676	77404677	chr11_77404676_77404677_A	0	-
chr11	77911157	77911158	chr11_77911157_77911158_T	0	+
chr11	8013602	8013603	chr11_8013602_8013603_T	0	+
chr11	8014401	8014402	chr11_8014401_8014402_A	0	+
chr11	82879443	82879444	chr11_82879443_82879444_A	0	+
chr11	82903957	82903958	chr11_82903957_82903958_A	0	-
chr11	837219	837220	chr11_837219_837220_A	0	+
chr11	85345107	85345108	chr11_85345107_85345108_A	0	+
chr11	85374674	85374675	chr11_85374674_85374675_T	0	-
chr11	85374740	85374741	chr11_85374740_85374741_G	0	-
chr11	85374750	85374751	chr11_85374750_85374751_G	0	-
chr11	85711844	85711845	chr11_85711844_85711845_A	0	-
chr11	86014372	86014373	chr11_86014372_86014373_A	0	+
chr11	86158267	86158268	chr11_86158267_86158268_A	0	-
chr11	870182	870183	chr11_870182_870183_A	0	-
chr11	8704728	8704729	chr11_8704728_8704729_A	0	+
chr11	884193	884194	chr11_884193_884194_A	0	-
chr11	89938756	89938757	chr11_89938756_89938757_A	0	-
chr11	9166690	9166691	chr11_9166690_9166691_G	0	-
chr11	93462570	93462571	chr11_93462570_93462571_A	0	+
chr11	93462948	93462949	chr11_93462948_93462949_T	0	+
chr11	93465477	93465478	chr11_93465477_93465478_A	0	-
chr11	93465483	93465484	chr11_93465483_93465484_A	0	-
chr11	93467852	93467853	chr11_93467852_93467853_T	0	-
chr11	93467855	93467856	chr11_93467855_93467856_T	0	-
chr11	93471691	93471692	chr11_93471691_93471692_A	0	-
chr11	94180637	94180638	chr11_94180637_94180638_A	0	-
chr11	9431454	9431455	chr11_9431454_9431455_T	0	+
chr11	9445289	9445290	chr11_9445289_9445290_G	0	+
chr11	9450549	9450550	chr11_9450549_9450550_A	0	+
chr11	9452393	9452394	chr11_9452393_9452394_A	0	+
chr11	9496074	9496075	chr11_9496074_9496075_A	0	+
chr11	9867316	9867317	chr11_9867316_9867317_T	0	-
chr12	100613744	100613745	chr12_100613744_100613745_A	0	+
chr12	101768557	101768558	chr12_101768557_101768558_A	0	+
chr12	102559475	102559476	chr12_102559475_102559476_A	0	+
chr12	1025669	1025670	chr12_1025669_1025670_C	0	-
chr12	104187065	104187066	chr12_104187065_104187066_A	0	-
chr12	104325267	104325268	chr12_104325267_104325268_G	0	+
chr12	104336834	104336835	chr12_104336834_104336835_A	0	+
chr12	104350551	104350552	chr12_104350551_104350552_A	0	-
chr12	104720103	104720104	chr12_104720103_104720104_A	0	+
chr12	105560615	105560616	chr12_105560615_105560616_A	0	+
chr12	106890504	106890505	chr12_106890504_106890505_C	0	+
chr12	10854755	10854756	chr12_10854755_10854756_A	0	-
chr12	108918311	108918312	chr12_108918311_108918312_G	0	-
chr12	108919406	108919407	chr12_108919406_108919407_C	0	-
chr12	108930587	108930588	chr12_108930587_108930588_A	0	-
chr12	109530617	109530618	chr12_109530617_109530618_A	0	-
chr12	109927705	109927706	chr12_109927705_109927706_A	0	+
chr12	109961752	109961753	chr12_109961752_109961753_A	0	+
chr12	110009543	110009544	chr12_110009543_110009544_A	0	-
chr12	110354365	110354366	chr12_110354365_110354366_A	0	+
chr12	110376393	110376394	chr12_110376393_110376394_C	0	-
chr12	110780996	110780997	chr12_110780996_110780997_A	0	+
chr12	110874035	110874036	chr12_110874035_110874036_A	0	-
chr12	110874040	110874041	chr12_110874040_110874041_A	0	-
chr12	110974922	110974923	chr12_110974922_110974923_A	0	-
chr12	111158994	111158995	chr12_111158994_111158995_A	0	-
chr12	111158996	111158997	chr12_111158996_111158997_T	0	-
chr12	111160530	111160531	chr12_111160530_111160531_T	0	-
chr12	111885754	111885755	chr12_111885754_111885755_A	0	+
chr12	112184825	112184826	chr12_112184825_112184826_C	0	+
chr12	112185075	112185076	chr12_112185075_112185076_A	0	+
chr12	112303918	112303919	chr12_112303918_112303919_A	0	+
chr12	112308861	112308862	chr12_112308861_112308862_A	0	+
chr12	112321361	112321362	chr12_112321361_112321362_A	0	+
chr12	112605742	112605743	chr12_112605742_112605743_A	0	-
chr12	112631013	112631014	chr12_112631013_112631014_A	0	-
chr12	112688970	112688971	chr12_112688970_112688971_G	0	-
chr12	112843856	112843857	chr12_112843856_112843857_A	0	-
chr12	112844170	112844171	chr12_112844170_112844171_T	0	-
chr12	112846292	112846293	chr12_112846292_112846293_G	0	-
chr12	113617832	113617833	chr12_113617832_113617833_T	0	-
chr12	113716544	113716545	chr12_113716544_113716545_A	0	+
chr12	113730715	113730716	chr12_113730715_113730716_A	0	+
chr12	113812578	113812579	chr12_113812578_113812579_A	0	+
chr12	114390414	114390415	chr12_114390414_114390415_A	0	-
chr12	114397738	114397739	chr12_114397738_114397739_G	0	-
chr12	116429785	116429786	chr12_116429785_116429786_A	0	-
chr12	120106012	120106013	chr12_120106012_120106013_G	0	+
chr12	120110084	120110085	chr12_120110084_120110085_A	0	+
chr12	120110088	120110089	chr12_120110088_120110089_A	0	+
chr12	120205008	120205009	chr12_120205008_120205009_A	0	-
chr12	120575140	120575141	chr12_120575140_120575141_T	0	-
chr12	120576247	120576248	chr12_120576247_120576248_C	0	-
chr12	120580769	120580770	chr12_120580769_120580770_A	0	-
chr12	120582272	120582273	chr12_120582272_120582273_A	0	-
chr12	120582894	120582895	chr12_120582894_120582895_A	0	-
chr12	120583157	120583158	chr12_120583157_120583158_G	0	-
chr12	120587872	120587873	chr12_120587872_120587873_A	0	-
chr12	120594815	120594816	chr12_120594815_120594816_T	0	-
chr12	120598085	120598086	chr12_120598085_120598086_A	0	-
chr12	120613697	120613698	chr12_120613697_120613698_G	0	-
chr12	120613698	120613699	chr12_120613698_120613699_A	0	-
chr12	120634758	120634759	chr12_120634758_120634759_A	0	-
chr12	120636472	120636473	chr12_120636472_120636473_A	0	-
chr12	120636654	120636655	chr12_120636654_120636655_T	0	-
chr12	120636696	120636697	chr12_120636696_120636697_G	0	-
chr12	120636704	120636705	chr12_120636704_120636705_G	0	-
chr12	120660829	120660830	chr12_120660829_120660830_A	0	-
chr12	121176593	121176594	chr12_121176593_121176594_A	0	+
chr12	121746529	121746530	chr12_121746529_121746530_A	0	-
chr12	122209364	122209365	chr12_122209364_122209365_A	0	+
chr12	122294553	122294554	chr12_122294553_122294554_A	0	-
chr12	122614104	122614105	chr12_122614104_122614105_G	0	+
chr12	122614441	122614442	chr12_122614441_122614442_A	0	+
chr12	122617868	122617869	chr12_122617868_122617869_T	0	+
chr12	122622720	122622721	chr12_122622720_122622721_A	0	+
chr12	122748271	122748272	chr12_122748271_122748272_A	0	-
chr12	122975135	122975136	chr12_122975135_122975136_A	0	-
chr12	123005154	123005155	chr12_123005154_123005155_A	0	-
chr12	123031143	123031144	chr12_123031143_123031144_A	0	+
chr12	123335741	123335742	chr12_123335741_123335742_A	0	+
chr12	123340068	123340069	chr12_123340068_123340069_A	0	+
chr12	123342621	123342622	chr12_123342621_123342622_A	0	+
chr12	123345440	123345441	chr12_123345440_123345441_A	0	+
chr12	123466122	123466123	chr12_123466122_123466123_C	0	+
chr12	123686895	123686896	chr12_123686895_123686896_A	0	-
chr12	123880864	123880865	chr12_123880864_123880865_A	0	+
chr12	124094461	124094462	chr12_124094461_124094462_A	0	+
chr12	124137061	124137062	chr12_124137061_124137062_A	0	+
chr12	124819189	124819190	chr12_124819189_124819190_A	0	-
chr12	124826643	124826644	chr12_124826643_124826644_C	0	-
chr12	124839152	124839153	chr12_124839152_124839153_A	0	-
chr12	124914274	124914275	chr12_124914274_124914275_G	0	-
chr12	125396728	125396729	chr12_125396728_125396729_G	0	-
chr12	125396734	125396735	chr12_125396734_125396735_G	0	-
chr12	125396936	125396937	chr12_125396936_125396937_G	0	-
chr12	125397781	125397782	chr12_125397781_125397782_A	0	-
chr12	125397813	125397814	chr12_125397813_125397814_G	0	-
chr12	125397873	125397874	chr12_125397873_125397874_T	0	-
chr12	125432751	125432752	chr12_125432751_125432752_A	0	-
chr12	125453217	125453218	chr12_125453217_125453218_C	0	-
chr12	125453531	125453532	chr12_125453531_125453532_G	0	-
chr12	12974870	12974871	chr12_12974870_12974871_A	0	+
chr12	12976772	12976773	chr12_12976772_12976773_T	0	+
chr12	12977441	12977442	chr12_12977441_12977442_A	0	+
chr12	131488700	131488701	chr12_131488700_131488701_A	0	+
chr12	132393659	132393660	chr12_132393659_132393660_A	0	+
chr12	132394294	132394295	chr12_132394294_132394295_A	0	+
chr12	132396462	132396463	chr12_132396462_132396463_A	0	+
chr12	132398855	132398856	chr12_132398855_132398856_A	0	+
chr12	132403023	132403024	chr12_132403023_132403024_A	0	+
chr12	132627000	132627001	chr12_132627000_132627001_A	0	-
chr12	133215909	133215910	chr12_133215909_133215910_A	0	-
chr12	133219602	133219603	chr12_133219602_133219603_A	0	-
chr12	133234067	133234068	chr12_133234067_133234068_A	0	-
chr12	133237769	133237770	chr12_133237769_133237770_G	0	-
chr12	133256868	133256869	chr12_133256868_133256869_T	0	-
chr12	133256871	133256872	chr12_133256871_133256872_T	0	-
chr12	133277813	133277814	chr12_133277813_133277814_A	0	+
chr12	133324947	133324948	chr12_133324947_133324948_A	0	-
chr12	133353707	133353708	chr12_133353707_133353708_C	0	-
chr12	133360922	133360923	chr12_133360922_133360923_A	0	-
chr12	21807634	21807635	chr12_21807634_21807635_A	0	-
chr12	22824178	22824179	chr12_22824178_22824179_A	0	+
chr12	23696345	23696346	chr12_23696345_23696346_A	0	-
chr12	25356766	25356767	chr12_25356766_25356767_G	0	+
chr12	27132892	27132893	chr12_27132892_27132893_A	0	-
chr12	27132895	27132896	chr12_27132895_27132896_A	0	-
chr12	2932905	2932906	chr12_2932905_2932906_G	0	+
chr12	31237881	31237882	chr12_31237881_31237882_A	0	+
chr12	31241952	31241953	chr12_31241952_31241953_A	0	+
chr12	31545365	31545366	chr12_31545365_31545366_A	0	-
chr12	32140153	32140154	chr12_32140153_32140154_A	0	+
chr12	32891166	32891167	chr12_32891166_32891167_A	0	+
chr12	39716711	39716712	chr12_39716711_39716712_A	0	-
chr12	39726571	39726572	chr12_39726571_39726572_A	0	-
chr12	44193329	44193330	chr12_44193329_44193330_A	0	-
chr12	46124973	46124974	chr12_46124973_46124974_A	0	+
chr12	46623077	46623078	chr12_46623077_46623078_A	0	-
chr12	46764666	46764667	chr12_46764666_46764667_A	0	-
chr12	48526633	48526634	chr12_48526633_48526634_T	0	+
chr12	48528476	48528477	chr12_48528476_48528477_G	0	+
chr12	48533599	48533600	chr12_48533599_48533600_A	0	+
chr12	48538790	48538791	chr12_48538790_48538791_A	0	+
chr12	48737547	48737548	chr12_48737547_48737548_A	0	-
chr12	49075457	49075458	chr12_49075457_49075458_T	0	-
chr12	49168895	49168896	chr12_49168895_49168896_T	0	-
chr12	49169506	49169507	chr12_49169506_49169507_A	0	-
chr12	49415961	49415962	chr12_49415961_49415962_A	0	-
chr12	49416182	49416183	chr12_49416182_49416183_A	0	-
chr12	49422763	49422764	chr12_49422763_49422764_A	0	-
chr12	49436734	49436735	chr12_49436734_49436735_A	0	-
chr12	49446515	49446516	chr12_49446515_49446516_C	0	-
chr12	49498363	49498364	chr12_49498363_49498364_A	0	-
chr12	49522284	49522285	chr12_49522284_49522285_G	0	+
chr12	49522750	49522751	chr12_49522750_49522751_A	0	-
chr12	49663552	49663553	chr12_49663552_49663553_A	0	+
chr12	50384601	50384602	chr12_50384601_50384602_T	0	-
chr12	50399200	50399201	chr12_50399200_50399201_A	0	-
chr12	51121458	51121459	chr12_51121458_51121459_A	0	+
chr12	51126118	51126119	chr12_51126118_51126119_A	0	+
chr12	51636088	51636089	chr12_51636088_51636089_A	0	+
chr12	52565541	52565542	chr12_52565541_52565542_C	0	-
chr12	52628912	52628913	chr12_52628912_52628913_A	0	+
chr12	52642346	52642347	chr12_52642346_52642347_A	0	+
chr12	53346479	53346480	chr12_53346479_53346480_A	0	+
chr12	53416251	53416252	chr12_53416251_53416252_G	0	+
chr12	53459776	53459777	chr12_53459776_53459777_C	0	-
chr12	53565268	53565269	chr12_53565268_53565269_A	0	-
chr12	53580147	53580148	chr12_53580147_53580148_A	0	+
chr12	53676021	53676022	chr12_53676021_53676022_C	0	+
chr12	53679672	53679673	chr12_53679672_53679673_C	0	+
chr12	53681730	53681731	chr12_53681730_53681731_C	0	+
chr12	53686336	53686337	chr12_53686336_53686337_A	0	+
chr12	53853030	53853031	chr12_53853030_53853031_A	0	+
chr12	53861561	53861562	chr12_53861561_53861562_A	0	+
chr12	53861565	53861566	chr12_53861565_53861566_C	0	+
chr12	53880121	53880122	chr12_53880121_53880122_A	0	-
chr12	53895772	53895773	chr12_53895772_53895773_A	0	+
chr12	53898367	53898368	chr12_53898367_53898368_A	0	+
chr12	54676283	54676284	chr12_54676283_54676284_T	0	+
chr12	54678023	54678024	chr12_54678023_54678024_A	0	+
chr12	54854280	54854281	chr12_54854280_54854281_A	0	-
chr12	54857107	54857108	chr12_54857107_54857108_A	0	-
chr12	550904	550905	chr12_550904_550905_T	0	+
chr12	56188698	56188699	chr12_56188698_56188699_A	0	-
chr12	56214016	56214017	chr12_56214016_56214017_A	0	+
chr12	56363228	56363229	chr12_56363228_56363229_A	0	+
chr12	56503615	56503616	chr12_56503615_56503616_T	0	+
chr12	56504159	56504160	chr12_56504159_56504160_T	0	+
chr12	56510912	56510913	chr12_56510912_56510913_G	0	+
chr12	56512840	56512841	chr12_56512840_56512841_C	0	+
chr12	56572337	56572338	chr12_56572337_56572338_A	0	-
chr12	56575408	56575409	chr12_56575408_56575409_A	0	-
chr12	56578918	56578919	chr12_56578918_56578919_A	0	-
chr12	56610429	56610430	chr12_56610429_56610430_A	0	-
chr12	56648525	56648526	chr12_56648525_56648526_A	0	-
chr12	56709056	56709057	chr12_56709056_56709057_A	0	-
chr12	56814969	56814970	chr12_56814969_56814970_A	0	-
chr12	56826345	56826346	chr12_56826345_56826346_A	0	-
chr12	5687195	5687196	chr12_5687195_5687196_A	0	-
chr12	56996669	56996670	chr12_56996669_56996670_A	0	-
chr12	56997506	56997507	chr12_56997506_56997507_A	0	-
chr12	57039155	57039156	chr12_57039155_57039156_A	0	-
chr12	57107001	57107002	chr12_57107001_57107002_A	0	-
chr12	57107003	57107004	chr12_57107003_57107004_T	0	-
chr12	57118334	57118335	chr12_57118334_57118335_A	0	-
chr12	57868778	57868779	chr12_57868778_57868779_C	0	-
chr12	57897979	57897980	chr12_57897979_57897980_A	0	+
chr12	57989644	57989645	chr12_57989644_57989645_A	0	+
chr12	58179909	58179910	chr12_58179909_58179910_A	0	+
chr12	58179918	58179919	chr12_58179918_58179919_T	0	+
chr12	58220208	58220209	chr12_58220208_58220209_A	0	-
chr12	6442706	6442707	chr12_6442706_6442707_A	0	-
chr12	64485031	64485032	chr12_64485031_64485032_A	0	+
chr12	64879685	64879686	chr12_64879685_64879686_A	0	+
chr12	65085224	65085225	chr12_65085224_65085225_A	0	+
chr12	6575193	6575194	chr12_6575193_6575194_A	0	-
chr12	6601656	6601657	chr12_6601656_6601657_A	0	-
chr12	6620224	6620225	chr12_6620224_6620225_A	0	+
chr12	6623900	6623901	chr12_6623900_6623901_A	0	+
chr12	6675810	6675811	chr12_6675810_6675811_A	0	-
chr12	6797413	6797414	chr12_6797413_6797414_A	0	-
chr12	68710054	68710055	chr12_68710054_68710055_A	0	-
chr12	69083298	69083299	chr12_69083298_69083299_A	0	+
chr12	6965156	6965157	chr12_6965156_6965157_C	0	+
chr12	6970585	6970586	chr12_6970585_6970586_A	0	+
chr12	6978818	6978819	chr12_6978818_6978819_A	0	+
chr12	69980508	69980509	chr12_69980508_69980509_T	0	+
chr12	70636698	70636699	chr12_70636698_70636699_G	0	-
chr12	7076515	7076516	chr12_7076515_7076516_C	0	-
chr12	7084218	7084219	chr12_7084218_7084219_A	0	+
chr12	7086935	7086936	chr12_7086935_7086936_A	0	-
chr12	72004566	72004567	chr12_72004566_72004567_G	0	-
chr12	72004929	72004930	chr12_72004929_72004930_A	0	-
chr12	72008750	72008751	chr12_72008750_72008751_A	0	-
chr12	72017417	72017418	chr12_72017417_72017418_A	0	-
chr12	77240346	77240347	chr12_77240346_77240347_A	0	+
chr12	80182626	80182627	chr12_80182626_80182627_A	0	-
chr12	8082498	8082499	chr12_8082498_8082499_T	0	-
chr12	88437343	88437344	chr12_88437343_88437344_A	0	+
chr12	88439327	88439328	chr12_88439327_88439328_A	0	+
chr12	88909420	88909421	chr12_88909420_88909421_A	0	-
chr12	89864300	89864301	chr12_89864300_89864301_A	0	-
chr12	95451673	95451674	chr12_95451673_95451674_A	0	-
chr12	95452291	95452292	chr12_95452291_95452292_A	0	-
chr12	95888702	95888703	chr12_95888702_95888703_A	0	+
chr12	95889761	95889762	chr12_95889761_95889762_A	0	+
chr12	97339438	97339439	chr12_97339438_97339439_A	0	+
chr12	98941313	98941314	chr12_98941313_98941314_A	0	+
chr12	98987731	98987732	chr12_98987731_98987732_C	0	+
chr13	103298619	103298620	chr13_103298619_103298620_A	0	+
chr13	103298620	103298621	chr13_103298620_103298621_G	0	+
chr13	103518957	103518958	chr13_103518957_103518958_C	0	+
chr13	110826364	110826365	chr13_110826364_110826365_A	0	-
chr13	110835653	110835654	chr13_110835653_110835654_A	0	-
chr13	111932790	111932791	chr13_111932790_111932791_G	0	+
chr13	113536104	113536105	chr13_113536104_113536105_A	0	+
chr13	20245949	20245950	chr13_20245949_20245950_A	0	+
chr13	21381805	21381806	chr13_21381805_21381806_A	0	-
chr13	21383390	21383391	chr13_21383390_21383391_A	0	-
chr13	21396039	21396040	chr13_21396039_21396040_T	0	-
chr13	25049756	25049757	chr13_25049756_25049757_A	0	-
chr13	25473744	25473745	chr13_25473744_25473745_A	0	-
chr13	33111187	33111188	chr13_33111187_33111188_T	0	-
chr13	33685077	33685078	chr13_33685077_33685078_A	0	-
chr13	39586396	39586397	chr13_39586396_39586397_A	0	-
chr13	45964993	45964994	chr13_45964993_45964994_G	0	+
chr13	46104794	46104795	chr13_46104794_46104795_A	0	+
chr13	46108810	46108811	chr13_46108810_46108811_A	0	+
chr13	49829941	49829942	chr13_49829941_49829942_A	0	+
chr13	52293301	52293302	chr13_52293301_52293302_T	0	+
chr13	53239743	53239744	chr13_53239743_53239744_A	0	+
chr13	60565418	60565419	chr13_60565418_60565419_A	0	-
chr13	73352551	73352552	chr13_73352551_73352552_A	0	-
chr13	73355159	73355160	chr13_73355159_73355160_A	0	-
chr13	73395957	73395958	chr13_73395957_73395958_A	0	+
chr13	77752113	77752114	chr13_77752113_77752114_A	0	-
chr13	79932587	79932588	chr13_79932587_79932588_A	0	-
chr13	95227162	95227163	chr13_95227162_95227163_A	0	-
chr13	95246185	95246186	chr13_95246185_95246186_A	0	-
chr13	95725586	95725587	chr13_95725586_95725587_A	0	-
chr13	96506748	96506749	chr13_96506748_96506749_A	0	-
chr13	96599451	96599452	chr13_96599451_96599452_A	0	-
chr13	98645122	98645123	chr13_98645122_98645123_A	0	+
chr13	98666284	98666285	chr13_98666284_98666285_A	0	+
chr13	98671809	98671810	chr13_98671809_98671810_A	0	+
chr13	99554179	99554180	chr13_99554179_99554180_A	0	-
chr14	100594834	100594835	chr14_100594834_100594835_A	0	+
chr14	100607496	100607497	chr14_100607496_100607497_A	0	+
chr14	100741029	100741030	chr14_100741029_100741030_A	0	+
chr14	100827030	100827031	chr14_100827030_100827031_A	0	-
chr14	102349450	102349451	chr14_102349450_102349451_A	0	+
chr14	102368030	102368031	chr14_102368030_102368031_A	0	+
chr14	102477053	102477054	chr14_102477053_102477054_A	0	+
chr14	102478184	102478185	chr14_102478184_102478185_A	0	+
chr14	102495855	102495856	chr14_102495855_102495856_A	0	+
chr14	102496134	102496135	chr14_102496134_102496135_A	0	+
chr14	102505723	102505724	chr14_102505723_102505724_A	0	+
chr14	102510178	102510179	chr14_102510178_102510179_A	0	+
chr14	102548184	102548185	chr14_102548184_102548185_A	0	-
chr14	102551792	102551793	chr14_102551792_102551793_T	0	-
chr14	102805410	102805411	chr14_102805410_102805411_A	0	+
chr14	103432744	103432745	chr14_103432744_103432745_A	0	-
chr14	103805481	103805482	chr14_103805481_103805482_A	0	+
chr14	103805485	103805486	chr14_103805485_103805486_A	0	+
chr14	103807276	103807277	chr14_103807276_103807277_A	0	+
chr14	103928719	103928720	chr14_103928719_103928720_A	0	+
chr14	103988666	103988667	chr14_103988666_103988667_A	0	-
chr14	104000862	104000863	chr14_104000862_104000863_A	0	+
chr14	104492356	104492357	chr14_104492356_104492357_A	0	+
chr14	105170231	105170232	chr14_105170231_105170232_A	0	+
chr14	105612861	105612862	chr14_105612861_105612862_A	0	-
chr14	105849120	105849121	chr14_105849120_105849121_A	0	+
chr14	105916374	105916375	chr14_105916374_105916375_A	0	+
chr14	105931409	105931410	chr14_105931409_105931410_A	0	+
chr14	20825182	20825183	chr14_20825182_20825183_A	0	+
chr14	20846715	20846716	chr14_20846715_20846716_A	0	-
chr14	20923705	20923706	chr14_20923705_20923706_A	0	+
chr14	20924046	20924047	chr14_20924046_20924047_G	0	+
chr14	20944512	20944513	chr14_20944512_20944513_A	0	+
chr14	21461244	21461245	chr14_21461244_21461245_A	0	+
chr14	21821746	21821747	chr14_21821746_21821747_A	0	-
chr14	21828715	21828716	chr14_21828715_21828716_A	0	-
chr14	21859242	21859243	chr14_21859242_21859243_A	0	-
chr14	21860997	21860998	chr14_21860997_21860998_A	0	-
chr14	21862673	21862674	chr14_21862673_21862674_A	0	-
chr14	23299234	23299235	chr14_23299234_23299235_C	0	+
chr14	23374893	23374894	chr14_23374893_23374894_A	0	-
chr14	23377972	23377973	chr14_23377972_23377973_A	0	-
chr14	23559354	23559355	chr14_23559354_23559355_A	0	-
chr14	23559869	23559870	chr14_23559869_23559870_A	0	-
chr14	24620958	24620959	chr14_24620958_24620959_A	0	+
chr14	24651630	24651631	chr14_24651630_24651631_A	0	-
chr14	24737718	24737719	chr14_24737718_24737719_G	0	-
chr14	31381208	31381209	chr14_31381208_31381209_A	0	-
chr14	31637710	31637711	chr14_31637710_31637711_A	0	-
chr14	31641364	31641365	chr14_31641364_31641365_A	0	-
chr14	35872595	35872596	chr14_35872595_35872596_T	0	-
chr14	37777231	37777232	chr14_37777231_37777232_A	0	+
chr14	39647015	39647016	chr14_39647015_39647016_A	0	+
chr14	50253496	50253497	chr14_50253496_50253497_A	0	-
chr14	50943056	50943057	chr14_50943056_50943057_A	0	-
chr14	53226378	53226379	chr14_53226378_53226379_A	0	+
chr14	53247486	53247487	chr14_53247486_53247487_A	0	-
chr14	56139622	56139623	chr14_56139622_56139623_A	0	+
chr14	57052456	57052457	chr14_57052456_57052457_A	0	+
chr14	57702554	57702555	chr14_57702554_57702555_A	0	-
chr14	58890724	58890725	chr14_58890724_58890725_G	0	-
chr14	58954564	58954565	chr14_58954564_58954565_A	0	+
chr14	60592326	60592327	chr14_60592326_60592327_A	0	+
chr14	64635567	64635568	chr14_64635567_64635568_A	0	+
chr14	64911388	64911389	chr14_64911388_64911389_A	0	+
chr14	65204005	65204006	chr14_65204005_65204006_T	0	+
chr14	67768661	67768662	chr14_67768661_67768662_A	0	+
chr14	68260495	68260496	chr14_68260495_68260496_A	0	-
chr14	69346847	69346848	chr14_69346847_69346848_A	0	-
chr14	69349335	69349336	chr14_69349335_69349336_A	0	-
chr14	69351051	69351052	chr14_69351051_69351052_A	0	-
chr14	69357026	69357027	chr14_69357026_69357027_A	0	-
chr14	69921494	69921495	chr14_69921494_69921495_A	0	+
chr14	70235296	70235297	chr14_70235296_70235297_A	0	+
chr14	70477444	70477445	chr14_70477444_70477445_A	0	+
chr14	72137805	72137806	chr14_72137805_72137806_A	0	+
chr14	73566976	73566977	chr14_73566976_73566977_A	0	+
chr14	73578214	73578215	chr14_73578214_73578215_A	0	+
chr14	74040060	74040061	chr14_74040060_74040061_A	0	+
chr14	74165353	74165354	chr14_74165353_74165354_C	0	+
chr14	74347879	74347880	chr14_74347879_74347880_A	0	+
chr14	75360021	75360022	chr14_75360021_75360022_A	0	+
chr14	75572726	75572727	chr14_75572726_75572727_A	0	-
chr14	76243052	76243053	chr14_76243052_76243053_T	0	+
chr14	76632973	76632974	chr14_76632973_76632974_A	0	+
chr14	77797389	77797390	chr14_77797389_77797390_A	0	+
chr14	78021887	78021888	chr14_78021887_78021888_A	0	-
chr14	81862547	81862548	chr14_81862547_81862548_A	0	-
chr14	91770363	91770364	chr14_91770363_91770364_A	0	-
chr14	97002193	97002194	chr14_97002193_97002194_G	0	+
chr14	97003277	97003278	chr14_97003277_97003278_A	0	+
chr15	100252570	100252571	chr15_100252570_100252571_A	0	+
chr15	101826031	101826032	chr15_101826031_101826032_A	0	-
chr15	101827238	101827239	chr15_101827238_101827239_A	0	-
chr15	102512756	102512757	chr15_102512756_102512757_C	0	+
chr15	102514076	102514077	chr15_102514076_102514077_A	0	+
chr15	102514083	102514084	chr15_102514083_102514084_A	0	+
chr15	102515182	102515183	chr15_102515182_102515183_C	0	+
chr15	20644399	20644400	chr15_20644399_20644400_C	0	-
chr15	20644512	20644513	chr15_20644512_20644513_G	0	-
chr15	22845741	22845742	chr15_22845741_22845742_A	0	+
chr15	22929676	22929677	chr15_22929676_22929677_A	0	+
chr15	23311861	23311862	chr15_23311861_23311862_C	0	-
chr15	28389395	28389396	chr15_28389395_28389396_A	0	-
chr15	28422680	28422681	chr15_28422680_28422681_A	0	-
chr15	28436422	28436423	chr15_28436422_28436423_A	0	-
chr15	28459555	28459556	chr15_28459555_28459556_A	0	-
chr15	28491240	28491241	chr15_28491240_28491241_A	0	-
chr15	28519610	28519611	chr15_28519610_28519611_A	0	-
chr15	28520183	28520184	chr15_28520183_28520184_A	0	-
chr15	29400449	29400450	chr15_29400449_29400450_A	0	+
chr15	29996554	29996555	chr15_29996554_29996555_A	0	-
chr15	30053510	30053511	chr15_30053510_30053511_A	0	-
chr15	31266692	31266693	chr15_31266692_31266693_C	0	-
chr15	32928433	32928434	chr15_32928433_32928434_A	0	+
chr15	34147178	34147179	chr15_34147178_34147179_A	0	-
chr15	34517713	34517714	chr15_34517713_34517714_A	0	+
chr15	34537624	34537625	chr15_34537624_34537625_A	0	-
chr15	34655691	34655692	chr15_34655691_34655692_A	0	-
chr15	35279896	35279897	chr15_35279896_35279897_A	0	-
chr15	40330618	40330619	chr15_40330618_40330619_A	0	-
chr15	40477725	40477726	chr15_40477725_40477726_A	0	+
chr15	40679331	40679332	chr15_40679331_40679332_A	0	+
chr15	40685618	40685619	chr15_40685618_40685619_T	0	+
chr15	40912810	40912811	chr15_40912810_40912811_A	0	+
chr15	40920785	40920786	chr15_40920785_40920786_A	0	+
chr15	40942701	40942702	chr15_40942701_40942702_A	0	+
chr15	40943638	40943639	chr15_40943638_40943639_A	0	+
chr15	41030270	41030271	chr15_41030270_41030271_A	0	-
chr15	41165727	41165728	chr15_41165727_41165728_A	0	-
chr15	41388153	41388154	chr15_41388153_41388154_A	0	-
chr15	41672266	41672267	chr15_41672266_41672267_T	0	+
chr15	41689366	41689367	chr15_41689366_41689367_A	0	-
chr15	41854720	41854721	chr15_41854720_41854721_A	0	+
chr15	41856360	41856361	chr15_41856360_41856361_A	0	+
chr15	41863217	41863218	chr15_41863217_41863218_A	0	+
chr15	42026684	42026685	chr15_42026684_42026685_A	0	+
chr15	42028345	42028346	chr15_42028345_42028346_A	0	+
chr15	42109086	42109087	chr15_42109086_42109087_A	0	+
chr15	42113742	42113743	chr15_42113742_42113743_T	0	+
chr15	42481434	42481435	chr15_42481434_42481435_A	0	-
chr15	42511868	42511869	chr15_42511868_42511869_A	0	-
chr15	42694292	42694293	chr15_42694292_42694293_A	0	+
chr15	42720357	42720358	chr15_42720357_42720358_G	0	-
chr15	42736479	42736480	chr15_42736479_42736480_A	0	-
chr15	43022982	43022983	chr15_43022982_43022983_A	0	-
chr15	43026565	43026566	chr15_43026565_43026566_A	0	-
chr15	43697373	43697374	chr15_43697373_43697374_A	0	+
chr15	44085890	44085891	chr15_44085890_44085891_A	0	+
chr15	44778724	44778725	chr15_44778724_44778725_A	0	+
chr15	44856925	44856926	chr15_44856925_44856926_A	0	-
chr15	44859825	44859826	chr15_44859825_44859826_A	0	-
chr15	44861728	44861729	chr15_44861728_44861729_A	0	-
chr15	44921067	44921068	chr15_44921067_44921068_A	0	-
chr15	48787807	48787808	chr15_48787807_48787808_A	0	-
chr15	49170550	49170551	chr15_49170550_49170551_G	0	+
chr15	49170621	49170622	chr15_49170621_49170622_G	0	+
chr15	51770566	51770567	chr15_51770566_51770567_A	0	-
chr15	55475632	55475633	chr15_55475632_55475633_A	0	-
chr15	55520933	55520934	chr15_55520933_55520934_A	0	-
chr15	55647459	55647460	chr15_55647459_55647460_A	0	+
chr15	59204840	59204841	chr15_59204840_59204841_A	0	-
chr15	59971085	59971086	chr15_59971085_59971086_A	0	-
chr15	60639922	60639923	chr15_60639922_60639923_A	0	-
chr15	60643472	60643473	chr15_60643472_60643473_G	0	-
chr15	60685659	60685660	chr15_60685659_60685660_A	0	-
chr15	62304381	62304382	chr15_62304381_62304382_A	0	-
chr15	62304387	62304388	chr15_62304387_62304388_A	0	-
chr15	64419340	64419341	chr15_64419340_64419341_A	0	+
chr15	64429745	64429746	chr15_64429745_64429746_A	0	+
chr15	64448362	64448363	chr15_64448362_64448363_T	0	-
chr15	64449130	64449131	chr15_64449130_64449131_A	0	-
chr15	65040787	65040788	chr15_65040787_65040788_A	0	-
chr15	65793134	65793135	chr15_65793134_65793135_A	0	-
chr15	65884092	65884093	chr15_65884092_65884093_A	0	-
chr15	66044979	66044980	chr15_66044979_66044980_A	0	-
chr15	66793443	66793444	chr15_66793443_66793444_G	0	-
chr15	66815991	66815992	chr15_66815991_66815992_G	0	+
chr15	67495954	67495955	chr15_67495954_67495955_A	0	-
chr15	67528433	67528434	chr15_67528433_67528434_A	0	-
chr15	69709698	69709699	chr15_69709698_69709699_A	0	+
chr15	69715471	69715472	chr15_69715471_69715472_A	0	+
chr15	69728862	69728863	chr15_69728862_69728863_T	0	+
chr15	70347044	70347045	chr15_70347044_70347045_C	0	-
chr15	70347656	70347657	chr15_70347656_70347657_A	0	-
chr15	70347661	70347662	chr15_70347661_70347662_C	0	-
chr15	70348741	70348742	chr15_70348741_70348742_A	0	-
chr15	70350022	70350023	chr15_70350022_70350023_A	0	-
chr15	70366967	70366968	chr15_70366967_70366968_A	0	-
chr15	72492120	72492121	chr15_72492120_72492121_C	0	-
chr15	72493031	72493032	chr15_72493031_72493032_A	0	-
chr15	72501257	72501258	chr15_72501257_72501258_T	0	-
chr15	72558332	72558333	chr15_72558332_72558333_G	0	-
chr15	74708355	74708356	chr15_74708355_74708356_A	0	-
chr15	74914809	74914810	chr15_74914809_74914810_A	0	+
chr15	75092726	75092727	chr15_75092726_75092727_A	0	+
chr15	75093003	75093004	chr15_75093003_75093004_A	0	+
chr15	75094647	75094648	chr15_75094647_75094648_A	0	+
chr15	75130155	75130156	chr15_75130155_75130156_A	0	-
chr15	75130161	75130162	chr15_75130161_75130162_A	0	-
chr15	75197073	75197074	chr15_75197073_75197074_A	0	-
chr15	75197242	75197243	chr15_75197242_75197243_A	0	-
chr15	75219254	75219255	chr15_75219254_75219255_A	0	-
chr15	75503069	75503070	chr15_75503069_75503070_A	0	+
chr15	75630965	75630966	chr15_75630965_75630966_G	0	+
chr15	75655131	75655132	chr15_75655131_75655132_A	0	-
chr15	75660558	75660559	chr15_75660558_75660559_C	0	-
chr15	75673100	75673101	chr15_75673100_75673101_A	0	-
chr15	76171411	76171412	chr15_76171411_76171412_A	0	+
chr15	78577700	78577701	chr15_78577700_78577701_A	0	-
chr15	78790347	78790348	chr15_78790347_78790348_A	0	+
chr15	79223870	79223871	chr15_79223870_79223871_A	0	-
chr15	82822812	82822813	chr15_82822812_82822813_A	0	-
chr15	82822814	82822815	chr15_82822814_82822815_T	0	-
chr15	82824562	82824563	chr15_82824562_82824563_G	0	-
chr15	83207155	83207156	chr15_83207155_83207156_A	0	-
chr15	83207157	83207158	chr15_83207157_83207158_T	0	-
chr15	83208905	83208906	chr15_83208905_83208906_G	0	-
chr15	85196951	85196952	chr15_85196951_85196952_A	0	-
chr15	85224088	85224089	chr15_85224088_85224089_A	0	-
chr15	86279298	86279299	chr15_86279298_86279299_A	0	+
chr15	88120889	88120890	chr15_88120889_88120890_T	0	+
chr15	89865264	89865265	chr15_89865264_89865265_A	0	-
chr15	89866805	89866806	chr15_89866805_89866806_C	0	-
chr15	89877171	89877172	chr15_89877171_89877172_A	0	-
chr15	90775580	90775581	chr15_90775580_90775581_A	0	-
chr15	90984698	90984699	chr15_90984698_90984699_A	0	+
chr15	91035754	91035755	chr15_91035754_91035755_A	0	+
chr15	91145541	91145542	chr15_91145541_91145542_A	0	+
chr15	91162944	91162945	chr15_91162944_91162945_A	0	+
chr15	91185127	91185128	chr15_91185127_91185128_A	0	+
chr15	91308496	91308497	chr15_91308496_91308497_A	0	+
chr15	91421989	91421990	chr15_91421989_91421990_A	0	+
chr15	91462834	91462835	chr15_91462834_91462835_A	0	+
chr15	91485640	91485641	chr15_91485640_91485641_C	0	+
chr15	91491857	91491858	chr15_91491857_91491858_A	0	+
chr15	91503534	91503535	chr15_91503534_91503535_A	0	+
chr15	91504825	91504826	chr15_91504825_91504826_A	0	+
chr15	91549317	91549318	chr15_91549317_91549318_A	0	-
chr15	93528697	93528698	chr15_93528697_93528698_A	0	+
chr15	99467729	99467730	chr15_99467729_99467730_G	0	+
chr16	106418	106419	chr16_106418_106419_A	0	+
chr16	11845375	11845376	chr16_11845375_11845376_A	0	-
chr16	11855383	11855384	chr16_11855383_11855384_A	0	-
chr16	11933869	11933870	chr16_11933869_11933870_A	0	-
chr16	11980811	11980812	chr16_11980811_11980812_A	0	-
chr16	1374700	1374701	chr16_1374700_1374701_A	0	+
chr16	1397370	1397371	chr16_1397370_1397371_G	0	+
chr16	14346190	14346191	chr16_14346190_14346191_G	0	+
chr16	1447400	1447401	chr16_1447400_1447401_A	0	-
chr16	14720961	14720962	chr16_14720961_14720962_G	0	-
chr16	14951331	14951332	chr16_14951331_14951332_A	0	+
chr16	1497760	1497761	chr16_1497760_1497761_C	0	-
chr16	1500685	1500686	chr16_1500685_1500686_A	0	-
chr16	15018337	15018338	chr16_15018337_15018338_C	0	+
chr16	15020988	15020989	chr16_15020988_15020989_A	0	+
chr16	15021035	15021036	chr16_15021035_15021036_A	0	+
chr16	15028995	15028996	chr16_15028995_15028996_A	0	+
chr16	1502917	1502918	chr16_1502917_1502918_A	0	-
chr16	1505816	1505817	chr16_1505816_1505817_A	0	-
chr16	15129281	15129282	chr16_15129281_15129282_A	0	+
chr16	15226804	15226805	chr16_15226804_15226805_A	0	-
chr16	15228224	15228225	chr16_15228224_15228225_A	0	-
chr16	15229638	15229639	chr16_15229638_15229639_A	0	-
chr16	1570367	1570368	chr16_1570367_1570368_G	0	-
chr16	15790539	15790540	chr16_15790539_15790540_A	0	+
chr16	16170161	16170162	chr16_16170161_16170162_A	0	+
chr16	16349834	16349835	chr16_16349834_16349835_A	0	+
chr16	16416988	16416989	chr16_16416988_16416989_C	0	+
chr16	16419639	16419640	chr16_16419639_16419640_A	0	+
chr16	16419686	16419687	chr16_16419686_16419687_A	0	+
chr16	16427482	16427483	chr16_16427482_16427483_A	0	+
chr16	1837650	1837651	chr16_1837650_1837651_A	0	+
chr16	1838546	1838547	chr16_1838546_1838547_A	0	+
chr16	18439391	18439392	chr16_18439391_18439392_C	0	-
chr16	18488976	18488977	chr16_18488976_18488977_A	0	-
chr16	18828827	18828828	chr16_18828827_18828828_C	0	-
chr16	18882825	18882826	chr16_18882825_18882826_A	0	-
chr16	19490733	19490734	chr16_19490733_19490734_A	0	+
chr16	19746640	19746641	chr16_19746640_19746641_A	0	+
chr16	2012930	2012931	chr16_2012930_2012931_C	0	-
chr16	2014657	2014658	chr16_2014657_2014658_G	0	-
chr16	2049148	2049149	chr16_2049148_2049149_T	0	-
chr16	2115497	2115498	chr16_2115497_2115498_A	0	+
chr16	2125772	2125773	chr16_2125772_2125773_C	0	+
chr16	2125777	2125778	chr16_2125777_2125778_A	0	+
chr16	2134931	2134932	chr16_2134931_2134932_A	0	+
chr16	21414302	21414303	chr16_21414302_21414303_G	0	-
chr16	21415323	21415324	chr16_21415323_21415324_G	0	-
chr16	21469402	21469403	chr16_21469402_21469403_A	0	-
chr16	21469981	21469982	chr16_21469981_21469982_A	0	-
chr16	2147520	2147521	chr16_2147520_2147521_A	0	-
chr16	2155549	2155550	chr16_2155549_2155550_A	0	-
chr16	2168540	2168541	chr16_2168540_2168541_A	0	-
chr16	21846484	21846485	chr16_21846484_21846485_G	0	-
chr16	21846736	21846737	chr16_21846736_21846737_G	0	-
chr16	21847631	21847632	chr16_21847631_21847632_G	0	-
chr16	21973755	21973756	chr16_21973755_21973756_T	0	+
chr16	2215850	2215851	chr16_2215850_2215851_A	0	+
chr16	2222165	2222166	chr16_2222165_2222166_A	0	+
chr16	22268046	22268047	chr16_22268046_22268047_A	0	+
chr16	223097	223098	chr16_223097_223098_A	0	+
chr16	22327899	22327900	chr16_22327899_22327900_A	0	+
chr16	22344938	22344939	chr16_22344938_22344939_G	0	+
chr16	22491562	22491563	chr16_22491562_22491563_A	0	+
chr16	22492141	22492142	chr16_22492141_22492142_A	0	+
chr16	226901	226902	chr16_226901_226902_A	0	+
chr16	2283861	2283862	chr16_2283861_2283862_G	0	+
chr16	2334457	2334458	chr16_2334457_2334458_A	0	-
chr16	2335666	2335667	chr16_2335666_2335667_A	0	-
chr16	23489846	23489847	chr16_23489846_23489847_A	0	-
chr16	23491224	23491225	chr16_23491224_23491225_A	0	-
chr16	23692211	23692212	chr16_23692211_23692212_A	0	+
chr16	240589	240590	chr16_240589_240590_A	0	-
chr16	24196759	24196760	chr16_24196759_24196760_C	0	+
chr16	24574482	24574483	chr16_24574482_24574483_A	0	+
chr16	24804765	24804766	chr16_24804765_24804766_A	0	+
chr16	24809210	24809211	chr16_24809210_24809211_A	0	+
chr16	24829891	24829892	chr16_24829891_24829892_A	0	+
chr16	24833371	24833372	chr16_24833371_24833372_G	0	+
chr16	24964383	24964384	chr16_24964383_24964384_A	0	-
chr16	24979770	24979771	chr16_24979770_24979771_A	0	-
chr16	2499794	2499795	chr16_2499794_2499795_A	0	+
chr16	2499803	2499804	chr16_2499803_2499804_A	0	+
chr16	2611742	2611743	chr16_2611742_2611743_A	0	+
chr16	2688450	2688451	chr16_2688450_2688451_A	0	-
chr16	27227222	27227223	chr16_27227222_27227223_A	0	+
chr16	27245610	27245611	chr16_27245610_27245611_A	0	-
chr16	27504059	27504060	chr16_27504059_27504060_A	0	-
chr16	27509170	27509171	chr16_27509170_27509171_A	0	-
chr16	27512688	27512689	chr16_27512688_27512689_A	0	-
chr16	28117558	28117559	chr16_28117558_28117559_A	0	-
chr16	28123295	28123296	chr16_28123295_28123296_A	0	-
chr16	28123352	28123353	chr16_28123352_28123353_A	0	-
chr16	28124392	28124393	chr16_28124392_28124393_A	0	-
chr16	2868654	2868655	chr16_2868654_2868655_A	0	+
chr16	2870925	2870926	chr16_2870925_2870926_T	0	+
chr16	28841906	28841907	chr16_28841906_28841907_A	0	+
chr16	28884418	28884419	chr16_28884418_28884419_A	0	+
chr16	28913163	28913164	chr16_28913163_28913164_A	0	+
chr16	28916390	28916391	chr16_28916390_28916391_T	0	-
chr16	2946328	2946329	chr16_2946328_2946329_A	0	+
chr16	29474631	29474632	chr16_29474631_29474632_G	0	+
chr16	29497180	29497181	chr16_29497180_29497181_A	0	-
chr16	29511630	29511631	chr16_29511630_29511631_A	0	-
chr16	29819849	29819850	chr16_29819849_29819850_A	0	+
chr16	29820826	29820827	chr16_29820826_29820827_G	0	+
chr16	2983694	2983695	chr16_2983694_2983695_A	0	+
chr16	29996501	29996502	chr16_29996501_29996502_A	0	+
chr16	29997550	29997551	chr16_29997550_29997551_A	0	+
chr16	30012058	30012059	chr16_30012058_30012059_A	0	+
chr16	30079941	30079942	chr16_30079941_30079942_A	0	+
chr16	30092487	30092488	chr16_30092487_30092488_A	0	+
chr16	30095963	30095964	chr16_30095963_30095964_C	0	+
chr16	30129504	30129505	chr16_30129504_30129505_A	0	-
chr16	30213976	30213977	chr16_30213976_30213977_G	0	+
chr16	30235299	30235300	chr16_30235299_30235300_G	0	-
chr16	30236175	30236176	chr16_30236175_30236176_G	0	-
chr16	3024694	3024695	chr16_3024694_3024695_A	0	-
chr16	30251598	30251599	chr16_30251598_30251599_A	0	-
chr16	30305539	30305540	chr16_30305539_30305540_G	0	-
chr16	3071194	3071195	chr16_3071194_3071195_G	0	+
chr16	3073383	3073384	chr16_3073383_3073384_C	0	-
chr16	30777437	30777438	chr16_30777437_30777438_G	0	+
chr16	30975375	30975376	chr16_30975375_30975376_A	0	+
chr16	30980588	30980589	chr16_30980588_30980589_A	0	+
chr16	309943	309944	chr16_309943_309944_A	0	+
chr16	30997715	30997716	chr16_30997715_30997716_A	0	+
chr16	31050835	31050836	chr16_31050835_31050836_C	0	+
chr16	3108724	3108725	chr16_3108724_3108725_A	0	-
chr16	313211	313212	chr16_313211_313212_G	0	+
chr16	3165336	3165337	chr16_3165336_3165337_A	0	+
chr16	31715509	31715510	chr16_31715509_31715510_A	0	+
chr16	3194424	3194425	chr16_3194424_3194425_A	0	+
chr16	3440539	3440540	chr16_3440539_3440540_A	0	-
chr16	3706074	3706075	chr16_3706074_3706075_A	0	+
chr16	3724522	3724523	chr16_3724522_3724523_C	0	-
chr16	3725427	3725428	chr16_3725427_3725428_G	0	-
chr16	3779905	3779906	chr16_3779905_3779906_A	0	-
chr16	3786838	3786839	chr16_3786838_3786839_A	0	-
chr16	3789752	3789753	chr16_3789752_3789753_A	0	-
chr16	4487376	4487377	chr16_4487376_4487377_A	0	+
chr16	4496859	4496860	chr16_4496859_4496860_A	0	+
chr16	4524191	4524192	chr16_4524191_4524192_A	0	-
chr16	4524198	4524199	chr16_4524198_4524199_A	0	-
chr16	4660012	4660013	chr16_4660012_4660013_A	0	-
chr16	46715425	46715426	chr16_46715425_46715426_A	0	-
chr16	4731535	4731536	chr16_4731535_4731536_A	0	+
chr16	4749199	4749200	chr16_4749199_4749200_A	0	-
chr16	47682978	47682979	chr16_47682978_47682979_A	0	+
chr16	47695609	47695610	chr16_47695609_47695610_A	0	+
chr16	4851613	4851614	chr16_4851613_4851614_A	0	-
chr16	4861826	4861827	chr16_4861826_4861827_A	0	-
chr16	4867729	4867730	chr16_4867729_4867730_A	0	-
chr16	4920494	4920495	chr16_4920494_4920495_A	0	+
chr16	50328520	50328521	chr16_50328520_50328521_A	0	+
chr16	50343435	50343436	chr16_50343435_50343436_A	0	+
chr16	53320077	53320078	chr16_53320077_53320078_A	0	+
chr16	53355410	53355411	chr16_53355410_53355411_A	0	+
chr16	56423314	56423315	chr16_56423314_56423315_A	0	-
chr16	56496416	56496417	chr16_56496416_56496417_A	0	+
chr16	56500755	56500756	chr16_56500755_56500756_A	0	+
chr16	56872823	56872824	chr16_56872823_56872824_G	0	+
chr16	56920243	56920244	chr16_56920243_56920244_A	0	+
chr16	56921802	56921803	chr16_56921802_56921803_A	0	+
chr16	56926839	56926840	chr16_56926839_56926840_T	0	+
chr16	57464273	57464274	chr16_57464273_57464274_A	0	-
chr16	57486691	57486692	chr16_57486691_57486692_G	0	+
[truncated: 2,338 more rows]

## Sheet: Split-Invert Alignment
Chromosome	Start	Stop	ID	Score	Strand
[truncated: 144,067 more rows]
