# Supplementary material for: Genome-wide discovery of human splicing branchpoints
Source: HighWire-hosted journal article supplement (doi:10.1101/gr.182899.114), 2015-01-05
Supplement: Supplemental_TableS2.xlsx [file Supplemental_TableS2.xlsx]

## Sheet: Sheet1
Supplementary Table 2. Human genome (hg19) coordinates of branchpoint nucleotides supporting mRNA exons not present in the GENCODE v19 comprehensive gene catalogue. The coordinates of supported exons are also provided.
BP chromosome	BP start	BP stop	BP	Blank	BP strand	Exon chromosome	Exon start	Exon stop	Transcript	Blank	Exon strand	Exon number	Distance from BP to start of exon
chr10	102795681	102795682	chr10_102795681_102795682_A	0	+	chr10	102795700	102795858	AK299405	0	+	4	19
chr10	46282038	46282039	chr10_46282038_46282039_A	0	+	chr10	46282059	46282122	AK001545	0	+	10	21
chr1	204226041	204226042	chr1_204226041_204226042_A	0	-	chr1	204225929	204226016	DQ925691	0	-	2	26
chr1	204428634	204428635	chr1_204428634_204428635_A	0	-	chr1	204428303	204428610	AK308153	0	-	10	25
chr1	46466603	46466604	chr1_46466603_46466604_A	0	+	chr1	46466630	46466651	AK309510	0	+	5	27
chr15	44010038	44010039	chr15_44010038_44010039_A	0	-	chr15	44009230	44010016	AK308370	0	-	2	23
chr16	2155635	2155636	chr16_2155635_2155636_A	0	-	chr16	2155322	2155616	AB209675	0	-	6	20
chr20	60703958	60703959	chr20_60703958_60703959_A	0	+	chr20	60703980	60704088	AK058202	0	+	5	22
chr22	19386739	19386740	chr22_19386739_19386740_A	0	-	chr22	19386602	19386715	AK302835	0	-	8	25
chr6	31378998	31378999	chr6_31378998_31378999_A	0	+	chr6	31379020	31379136	AK094237	0	+	3	22
chr7	99515545	99515546	chr7_99515545_99515546_A	0	-	chr7	99515394	99515508	AK293565	0	-	4	38
chr14	24031355	24031356	chr14_24031355_24031356_C	0	-	chr14	24031170	24031316	AK123354	0	-	10	40
chr17	36286940	36286941	chr17_36286940_36286941_T	0	+	chr17	36286964	36287187	AK303259	0	+	3	24
chr17	36286942	36286943	chr17_36286942_36286943_C	0	+	chr17	36286964	36287187	AK303259	0	+	3	22
chr17	36286945	36286946	chr17_36286945_36286946_A	0	+	chr17	36286964	36287187	AK303259	0	+	3	19
chr17	4719804	4719805	chr17_4719804_4719805_A	0	+	chr17	4719836	4720041	AB209374	0	+	12	32
chr21	45725036	45725037	chr21_45725036_45725037_A	0	+	chr21	45725070	45725300	AK303605	0	+	2	34
chr3	52524017	52524018	chr3_52524017_52524018_A	0	+	chr3	52524047	52524247	AK075000	0	+	3	30
