# Supplementary material for: Genome-wide discovery of human splicing branchpoints
Source: HighWire-hosted journal article supplement (doi:10.1101/gr.182899.114), 2015-01-05
Supplement: Supplemental_TableS3.xlsx [file Supplemental_TableS3.xlsx]

## Sheet: HGMD_knownBP
Supplementary Table 3. List of disease-associated SNPs from Human Gene Mutation Database (HGMD) and Catalog of Somatic Mutations in Cancer (COSMIC) that overlap branchpoints, or known or predicted motifs.
Chromsome	Start	Stop	Gene	Disease	Variation	HGMD ID
chr16	2141599	2141600	PKD1	Polycystic_kidney_disease_1	11538-2A>G	CS121788
chr12	6101203	6101204	VWF	Von_Willebrand_disease_1	6599-20A>T	CS070412
chr16	8898598	8898599	PMM2	Congenital_disorder_of_glycosylation_1a	179-25A>G	CS061318
chrX	32591645	32591646	DMD	Muscular_dystrophy,_Becker	1812+1G>A	CS073463
chr1	43396454	43396456	SLC2A1	Glucose_transporter_1_deficiency_syndrome	357dupT	CI101717
chr13	49047469	49047470	RB1	Retinoblastoma	2490-26A>G	CS081969
chr13	49047469	49047470	RB1	Retinoblastoma	2490-26A>C	CS083264
chr13	49047469	49047470	RB1	Retinoblastoma	2490-26A>T	CS083265
chr10	50681658	50681659	ERCC6	Cockayne_syndrome	2599-26A>G	CS099993
chr11	66291048	66291049	BBS1	Bardet-Biedl_syndrome	951+2T>C	CS114519
chr14	77751988	77751989	POMT2	Muscular_dystrophy,_congenital_with_mental_retardation	1333-14G>A	CS094606
chr16	89849345	89849346	FANCA	Fanconi_anaemia	1567-20A>G	CS032696
chrX	107845096	107845097	COL4A5	Alport_syndrome	2042-18A>G	HS080005
chr11	118959324	118959325	HMBS	Porphyria,_acute_intermittent	88-20A>C	CS0911057
chr10	127477604	127477605	UROS	Porphyria,_erythropoietic	661-31T>G	CS100777
chr2	128050301	128050302	ERCC3	Trichothiodystrophy	355A>C	CM970445
chrX	153131292	153131293	L1CAM	Hydrocephalus,_X-linked	2432-19A>C	CS920767
chr1	197097819	197097820	ASPM	Primary_microcephaly	2761-25A>G	CS091963
chr2	242680424	242680425	D2HGDH	D-2-hydroxyglutaric_aciduria	293-23A>G	CS050424

## Sheet: HGMD_motif
Chromsome	Start	Stop	Gene	Disease	Variation
chr1	11855406	11855407	MTHFR	Methylenetetrahydrofolate_reductase_deficiency	781-2A>G
chr1	43396435	43396436	SLC2A1	Glucose_transporter_1_deficiency_syndrome	377G>A
chr1	43396435	43396436	SLC2A1	Glucose_transporter_1_deficiency_syndrome	377G>T
chr1	43396436	43396437	SLC2A1	Glucose_transporter_1_deficiency_syndrome	376C>T
chr1	43396441	43396442	SLC2A1	Glucose_transporter_1_deficiency_syndrome	371T>G
chr1	43396454	43396456	SLC2A1	Glucose_transporter_1_deficiency_syndrome	357dupT
chr1	154562887	154562888	ADAR	Dyschromatosis_symmetrica_hereditaria	2271-3A>G
chr1	156107432	156107433	LMNA	Heart-hand_syndrome	1609-12T>G
chr1	197097819	197097820	ASPM	Primary_microcephaly	2761-25A>G
chr10	3824432	3824433	KLF6	Prostate_cancer,_risk,_association_with	103-27G>A
chr10	50681658	50681659	ERCC6	Cockayne_syndrome	2599-26A>G
chr10	126090409	126090410	OAT	Gyrate_atrophy	901-2A>G
chr10	127477604	127477605	UROS	Porphyria,_erythropoietic	661-31T>G
chr11	47369049	47369050	MYBPC3	Cardiomyopathy,_hypertrophic_	852-20C>A
chr11	64577625	64577626	MEN1	Multiple_endocrine_neoplasia_1	-23-22C>A
chr11	66291047	66291048	BBS1	Bardet-Biedl_syndrome	951+1G>A
chr11	66291048	66291049	BBS1	Bardet-Biedl_syndrome	951+2T>C
chr11	67810829	67810830	TCIRG1	Osteopetrosis,_autosomal_recessive	504-8G>A
chr11	67810831	67810832	TCIRG1	Osteopetrosis,_autosomal_recessive	504-6C>A
chr11	118959324	118959325	HMBS	Porphyria,_acute_intermittent	88-20A>C
chr11	118963450	118963451	HMBS	Porphyria,_acute_intermittent	772-17A>G
chr12	6101203	6101204	VWF	Von_Willebrand_disease_1	6599-20A>T
chr12	6442328	6442329	TNFRSF1A	Periodic_fever_with_amyloidosis_	473-16G>A
chr12	49446988	49446989	MLL2	Kabuki_syndrome	954+1G>T
chr12	110720408	110720410	ATP2A2	Darier_disease	119_120delAG
chr13	32893197	32893198	BRCA2	Breast_cancer_	68-16T>A
chr13	49047469	49047470	RB1	Retinoblastoma	2490-26A>G
chr13	49047469	49047470	RB1	Retinoblastoma	2490-26A>C
chr13	49047469	49047470	RB1	Retinoblastoma	2490-26A>T
chr14	77751988	77751989	POMT2	Muscular_dystrophy,_congenital_with_mental_retardation	1333-14G>A
chr15	89870581	89870582	POLG	Alpers_syndrome	1251-2A>T
chr16	2141599	2141600	PKD1	Polycystic_kidney_disease_1	11538-2A>G
chr16	2158372	2158373	PKD1	Polycystic_kidney_disease_1	6795C>A
chr16	2158376	2158377	PKD1	Polycystic_kidney_disease_1	6791C>G
chr16	2158386	2158387	PKD1	Polycystic_kidney_disease,_autosomal_dominant	6781delG
chr16	2168196	2168197	PKD1	Polycystic_kidney_disease_1	796C>T
chr16	8898598	8898599	PMM2	Congenital_disorder_of_glycosylation_1a	179-25A>G
chr16	89849345	89849346	FANCA	Fanconi_anaemia	1567-20A>G
chr17	7579373	7579374	TP53	Li-Fraumeni_syndrome	313G>T
chr17	7579377	7579378	TP53	Li-Fraumeni_syndrome	309C>A
chr17	7579600	7579601	TP53	Li-Fraumeni_syndrome	97-11C>G
chr17	48266635	48266636	COL1A1	Osteogenesis_imperfecta_II	2830G>T
chr17	48273027	48273028	COL1A1	Osteogenesis_imperfecta_I	1057-2A>G
chr17	48273027	48273028	COL1A1	Osteogenesis_imperfecta_I	1057-2A>C
chr17	48273737	48273738	COL1A1	Osteogenesis_imperfecta_I	904-10T>A
chr18	47797936	47797937	MBD1	Autism_	1779-27C>T
chr19	12768875	12768876	MAN2B1	Mannosidosis,_alpha	1309+1G>T
chr2	47643433	47643434	MSH2	Colorectal_cancer,_non-polyposis	943-1G>C
chr2	48032046	48032047	MSH6	Colorectal_cancer	3439-2A>G
chr2	48032047	48032048	MSH6	Colorectal_cancer,_non-polyposis	3439-1G>T
chr2	73115518	73115519	SPR	Tetrahydrobiopterin_deficiency	381C>G
chr2	128050301	128050302	ERCC3	Trichothiodystrophy	355A>C
chr2	225368564	225368565	CUL3	Pseudohypoaldosteronism_type_II	1207-26A>G
chr2	225368566	225368567	CUL3	Pseudohypoaldosteronism_type_II	1207-28T>G
chr2	242680424	242680425	D2HGDH	D-2-hydroxyglutaric_aciduria	293-23A>G
chr20	43035999	43036000	HNF4A	Diabetes,_MODY	291-21A>G
chr21	44492174	44492175	CBS	Homocystinuria	129G>A
chr21	45194212	45194213	CSTB	Epilepsy,_progressive_myoclonus	169-2A>G
chr22	51015480	51015481	CPT1B	Obesity,_modifier_of_risk,_association_with	282-18C>T
chr3	37091954	37091955	MLH1	Colorectal_cancer,_non-polyposis_	2104-22T>G
chr3	48623370	48623371	COL7A1	Epidermolysis_bullosa_dystrophica	3759+2T>G
chr5	6622213	6622214	NSUN2	Dubowitz-like_syndrome	538-1G>C
chr7	5568961	5568962	ACTB	Baraitser-Winter_syndrome	193C>G
chr8	11640661	11640662	NEIL2	Multiple_colorectal_adenoma_	492-50G>C
chr8	27646356	27646357	ESCO2	Roberts_syndrome	1132-7A>G
chr8	61765385	61765386	CHD7	CHARGE_syndrome	6104-2A>T
chr9	35075751	35075752	FANCG	Fanconi_anaemia	1144-1G>C
chr9	98241430	98241431	PTCH1	Nevoid_basal_cell_carcinoma_syndrome	1068-2A>C
chr9	130578353	130578354	ENG	Pulmonary_hypertension,_primary	1742-22T>C
chrX	32591645	32591646	DMD	Muscular_dystrophy,_Becker	1812+1G>A
chrX	32591646	32591647	DMD	Muscular_dystrophy,_Duchenne	1812delC
chrX	66765199	66765200	AR	Azoospermia,_hypergonadotropic_	212A>G
chrX	66765204	66765205	AR	Androgen_insensitivity_syndrome	217C>T
chrX	107845096	107845097	COL4A5	Alport_syndrome	2042-18A>G
chrX	153131272	153131273	L1CAM	Hydrocephalus,_X-linked	2433C>G
chrX	153131292	153131293	L1CAM	Hydrocephalus,_X-linked	2432-19A>C

## Sheet: HGMD_predictedMotifs
Chromsome	Start	Stop	Gene	Disease	Variation
chr1	5951088	5951089	NPHP4	Nephronophthisis_4	2144-1G>C
chr1	12027041	12027042	PLOD1	Ehlers-Danlos_syndrome_VIa,_kyphoscoliotic_type_	1651-2A>G
chr1	12027041	12027042	PLOD1	Ehlers-Danlos_syndrome_VI	1651-2delA
chr1	15766969	15766970	CTRC	Pancreatitis,_chronic_	133-19C>G
chr1	15771090	15771091	CTRC	Pancreatitis,_chronic_	494-10C>T
chr1	16451823	16451824	EPHA2	Cataracts	2826-9G>A
chr1	17371391	17371392	SDHB	Paraganglioma_	73-9A>G
chr1	25648371	25648372	RHD	Reduced_expression_(weak_D)	1154-8T>A
chr1	25718636	25718637	RHCE	Rhesus_blood_group_variant	487-5T>G
chr1	26142036	26142037	SEPN1	Multiminicore_disease	1603-2A>G
chr1	45797521	45797522	MUTYH	Adenomatous_polyposis_coli	998-1G>T
chr1	76200456	76200457	ACADM	Medium_chain_acyl_CoA_dehydrogenase_deficiency	388-19T>A
chr1	76226800	76226801	ACADM	Medium_chain_acyl_CoA_dehydrogenase_deficiency	946-6T>G
chr1	94476950	94476951	ABCA4	Cone-rod_dystrophy_with_extensive_atrophy	5461-10T>C
chr1	94488974	94488975	ABCA4	Stargardt_disease	4635-1G>T
chr1	94502345	94502346	ABCA4	Stargardt_disease	3814-2A>G
chr1	100671863	100671864	DBT	Maple_syrup_urine_disease_2	1210-7A>G
chr1	103377768	103377769	COL11A1	Marshall_/_Stickler_syndrome	4033-1G>C
chr1	155260471	155260472	PKLR	Haemolytic_anaemia	1619-3C>G
chr1	156106002	156106003	LMNA	Muscular_dystrophy,_Emery-Dreifuss	1158-2A>G
chr1	156843391	156843392	NTRK1	Pain_insensitivity,_congenital	851-33T>A
chr1	161138779	161138780	PPOX	Porphyria,_variegate	617-3C>A
chr1	161173223	161173224	NDUFS2	Isolated_Complex_I_deficiency	96-3C>T
chr1	173797458	173797459	DARS2	Leukoencephalopathy,_brain_&_spine_involvement,_lactate_elevation	228-12C>A
chr1	173797459	173797460	DARS2	Leukoencephalopathy,_brain_&_spine_involvement,_lactate_elevation	228-11C>G
chr1	173797460	173797461	DARS2	Leukoencephalopathy,_brain_&_spine_involvement,_lactate_elevation	228-10C>A
chr1	179533929	179533930	NPHS2	Nephrotic_syndrome,_steroid_resistant	275-2A>C
chr1	183192259	183192260	LAMC2	Epidermolysis_bullosa,_Herlitz	764-10T>G
chr1	197031099	197031100	F13B	Factor_XIII_deficiency	266-1G>C
chr1	201294066	201294067	PKP1	Ectodermal_dysplasia/skin_fragility_syndrome	1835-2A>G
chr1	209806479	209806480	LAMB3	Epidermolysis_bullosa,_Herlitz	565-2A>G
chr1	209964232	209964233	IRF6	Van_der_Woude_syndrome	668-1G>A
chr1	209975410	209975411	IRF6	Oral_clefts,_non-syndromic	-75-23G>C
chr1	215916677	215916678	USH2A	Usher_syndrome_2	11390-1G>C
chr1	216040528	216040529	USH2A	Usher_syndrome_	8682-17A>G
chr1	216256933	216256934	USH2A	Usher_syndrome_	5168-6T>A
chr1	216420576	216420577	USH2A	Usher_syndrome_2a	2168-9T>G
chr1	225592416	225592417	LBR	Pelger-Huet_anomaly	1484-9A>G
chr1	241669482	241669483	FH	Multiple_leiomyomatosis_	739-15T>G
chr1	247586486	247586487	NLRP3	Muckle-Wells_syndrome_	284-45T>C
chr10	14981868	14981869	DCLRE1C	Immunodeficiency,_severe_combined	247-1G>T
chr10	43615504	43615505	RET	Hirschsprung_disease,_association_with	2608-24G>A
chr10	50667280	50667281	ERCC6	Cockayne_syndrome	4063-1G>C
chr10	88671994	88671995	BMPR1A	Juvenile_polyposis_syndrome	531-2A>G
chr10	89685267	89685268	PTEN	Cowden_disease	165-2A>G
chr10	89685268	89685269	PTEN	Cowden_disease	165-1G>A
chr10	95380376	95380377	PDE6C	Achromatopsia	481-12T>A
chr10	96707470	96707471	CYP2C9	Warfarin_sensitivity	482-65G>C
chr10	119305138	119305139	EMX2	Schizencephaly	407-4G>T
chr11	2187016	2187017	TH	Extrapyramidal_movement_disorder	1105-24T>A
chr11	5246958	5246959	HBB	Thalassaemia_beta	316-3C>G
chr11	5246958	5246959	HBB	Thalassaemia_beta	316-3C>A
chr11	5246962	5246963	HBB	Thalassaemia_beta	316-7C>G
chr11	5246962	5246963	HBB	Sickle_cell_anaemia	316-7C>A
chr11	5246963	5246964	HBB	Thalassaemia_beta	316-8T>G
chr11	5247045	5247046	HBB	Haemoglobin_variant	316-90A>G
chr11	6635917	6635918	TPP1	Neuronal_ceroid_lipofuscinosis,_late_infantile	1552-1G>C
chr11	6637306	6637307	TPP1	Neuronal_ceroid_lipofuscinosis,_late_infantile	1076-2A>G
chr11	17415958	17415959	ABCC8	Hypoglycaemia,_persistent_hyperinsulinaemic	4412-13G>A
chr11	17428433	17428434	ABCC8	Hyperinsulinism	3162+1G>A
chr11	17452579	17452580	ABCC8	Diabetes,_type_2,_association_with	1672-74G>A
chr11	17548358	17548359	USH1C	Usher_syndrome_1c	522-2A>T
chr11	31816376	31816377	PAX6	Aniridia	524-41T>G
chr11	32450170	32450171	WT1	Wilms_tumour,_adult	647-6C>A
chr11	44130742	44130743	EXT2	Multiple_exostoses	537-1G>A
chr11	44257801	44257802	EXT2	Diabetes,_type_2,_reduced_risk,_association_with_	C>T
chr11	46742047	46742048	F2	Hypoprothrombinaemia	241-25C>G
chr11	47359370	47359371	MYBPC3	Cardiomyopathy,_hypertrophic	2309-26A>G
chr11	47364295	47364296	MYBPC3	Cardiomyopathy,_hypertrophic	1458-1G>C
chr11	57381787	57381788	SERPING1	Angioneurotic_oedema	1250-13G>A
chr11	62459946	62459947	BSCL2	Berardinelli-Seip_lipodystrophy	574-2A>G
chr11	64496516	64496517	RASGRP2	Leukocyte_adhesion_deficiency_3	1592-3C>A
chr11	64525846	64525847	PYGM	McArdle_disease	425-26A>G
chr11	67811035	67811036	TCIRG1	Osteopetrosis,_infantile_malignant	631-2A>C
chr11	76853752	76853753	MYO7A	Usher_syndrome_1b	19-2A>G
chr11	76873890	76873891	MYO7A	Usher_syndrome_1b	1555-8C>G
chr11	76893447	76893448	MYO7A	Usher_syndrome_1b	3109-21G>A
chr11	88960983	88960984	TYR	Albinism,_oculocutaneous_1	1037-7T>A
chr11	102465489	102465490	MMP20	Pigmented_hypomaturation_amelogenesis_imperfecta	954-2A>T
chr11	108016926	108016927	ACAT1	Acetoacetyl-CoA-thiolase_deficiency	1006-2A>C
chr11	108016927	108016928	ACAT1	Acetoacetyl-CoA-thiolase_deficiency	1006-1G>C
chr11	108119653	108119654	ATM	Breast_cancer,_susceptibility_to	1066-6T>G
chr11	108143446	108143447	ATM	Ataxia_telangiectasia	3154-2A>G
chr11	108150215	108150216	ATM	Ataxia_telangiectasia	3285-2A>G
chr11	108151709	108151710	ATM	Ataxia_telangiectasia	3403-12T>A
chr11	108159694	108159695	ATM	Ataxia_telangiectasia	4110-9C>G
chr11	108164027	108164028	ATM	Ataxia_telangiectasia	4612-12A>G
chr11	108202603	108202604	ATM	Ataxia_telangiectasia	7630-2A>C
chr11	108202603	108202604	ATM	Ataxia_telangiectasia	7630-2A>T
chr11	108203485	108203486	ATM	Ataxia_telangiectasia	7789-3T>G
chr11	108205693	108205694	ATM	Ataxia_telangiectasia	8011-2A>C
chr11	111958578	111958579	SDHD	Paraganglioma	53-2A>G
chr11	111965496	111965497	SDHD	Paraganglioma	315-32T>C
chr11	118958943	118958944	HMBS	Porphyria,_acute_intermittent	34-21A>G
chr11	118959841	118959842	HMBS	Porphyria,_acute_intermittent	210+1G>A
chr11	118959841	118959843	HMBS	Porphyria,_acute_intermittent	210+1dupG
chr11	118959842	118959843	HMBS	Porphyria,_acute_intermittent	210+2T>C
chr12	6443044	6443045	TNFRSF1A	Periodic_fever,_autosomal_dominant	194-14G>A
chr12	32786480	32786481	FGD4	Charcot-Marie-Tooth_disease_4H	1762-2A>G
chr12	44180200	44180201	IRAK4	IRAK4_deficiency	1189-1G>T
chr12	48383589	48383590	COL2A1	Kniest_dysplasia	1024-2A>C
chr12	52307339	52307340	ACVRL1	Haemorrhagic_telangiectasia_2	314-3C>G
chr12	88519146	88519147	CEP290	Joubert_syndrome,_Senior-Loken_type	1066-1G>A
chr12	103245535	103245536	PAH	Phenylketonuria	843-2A>T
chr12	103288708	103288709	PAH	Phenylketonuria	169-13T>G
chr12	110777297	110777298	ATP2A2	Darier_disease	1543-10A>G
chr12	113357192	113357193	OAS1	Viral_infection,_susceptibility,_association_with	1039-1G>A
chr12	121426634	121426635	HNF1A	Diabetes,_MODY	327-1G>A
chr13	32893204	32893205	BRCA2	Breast_cancer_	68-9T>G
chr13	32893206	32893207	BRCA2	Ovarian_cancer	68-7T>A
chr13	32900633	32900634	BRCA2	Ovarian_cancer	517-2A>G
chr13	32900634	32900635	BRCA2	Breast_cancer	517-1G>A
chr13	32936650	32936651	BRCA2	Breast_cancer	7806-9T>G
chr13	32971006	32971007	BRCA2	Breast_cancer	9502-28A>G
chr13	48923089	48923090	RB1	Retinoblastoma	540-2A>G
chr13	48923090	48923091	RB1	Retinoblastoma	540-1G>A
chr13	48954174	48954175	RB1	Retinoblastoma	1390-14A>G
chr13	49030328	49030329	RB1	Retinoblastoma	1815-11A>G
chr13	49047487	49047488	RB1	Retinoblastoma_	2490-8C>G
chr13	49047488	49047489	RB1	Retinoblastoma	2490-7T>G
chr13	49047489	49047490	RB1	Retinoblastoma	2490-6T>A
chr14	24731560	24731561	TGM1	Ichthyosis,_congenital,_autosomal_recessive	-2-1G>C
chr14	32319297	32319298	NUBPL	Complex_I_deficiency	815-27T>C
chr14	50734629	50734630	L2HGDH	L-2-Hydroxyglutaric_aciduria	907-2A>G
chr14	55326455	55326456	GCH1	Dystonia,_dopa-responsive	454-2A>G
chr14	68236447	68236448	ZFYVE26	Spastic_paraplegia	5485-1G>A
chr14	77751980	77751981	POMT2	Muscular_dystrophy,_congenital	1333-6T>G
chr15	31359392	31359393	TRPM1	Stationary_night_blindness,_congenital	428-3C>G
chr15	40703455	40703457	IVD	Isovaleric_acidaemia	466-3_466-2delCAinsGG
chr15	40703456	40703457	IVD	Isovaleric_acidaemia	466-2A>G
chr15	40707597	40707598	IVD	Isovaleric_acidaemia	888-2A>G
chr15	42686452	42686453	CAPN3	Muscular_dystrophy,_limb_girdle	1030-1G>A
chr15	43360234	43360236	UBR1	Johanson-Blizzard_syndrome	660-2_660-1delAG
chr15	44856897	44856899	SPG11	Spastic_paraplegia,_autosomal_recessive	7000-3_7000-2insGGA
chr15	48826402	48826403	FBN1	Marfan_syndrome	737-1G>A
chr15	48903029	48903030	FBN1	Marfan_syndrome	248-7T>G
chr15	51514722	51514723	CYP19A1	Aromatase_deficiency	452-1G>A
chr15	90209173	90209174	PLIN1	Partial_lipodystrophy,_dyslipidemia_&_insulin-resistant_diabetes	1210-1G>T
chr15	91303374	91303375	BLM	Bloom_syndrome	1088-2A>G
chr15	91549290	91549291	VPS33B	Arthrogryposis,_renal_dysfunction_and_cholestasis	853-2A>G
chr16	2103340	2103341	TSC2	Tuberous_sclerosis	226-2A>G
chr16	2105400	2105401	TSC2	Tuberous_sclerosis	482-2A>C
chr16	2107104	2107105	TSC2	Tuberous_sclerosis	775-1G>A
chr16	2112494	2112495	TSC2	Tuberous_sclerosis	1258-3C>G
chr16	2112495	2112496	TSC2	Tuberous_sclerosis	1258-2A>C
chr16	2112496	2112497	TSC2	Tuberous_sclerosis	1258-1G>A
chr16	2121508	2121509	TSC2	Tuberous_sclerosis	1840-2A>T
chr16	2125797	2125798	TSC2	Tuberous_sclerosis	2546-2A>G
chr16	2125797	2125798	TSC2	Tuberous_sclerosis	2546-2A>T
chr16	2125798	2125799	TSC2	Tuberous_sclerosis	2546-1G>A
chr16	2135164	2135165	TSC2	Tuberous_sclerosis	4570-66G>A
chr16	2138030	2138031	TSC2	Tuberous_sclerosis	5069-18A>G
chr16	2138046	2138047	TSC2	Tuberous_sclerosis	5069-2A>G
chr16	2336968	2336969	ABCA3	Fatal_surfactant_deficiency	3005-1G>A
chr16	2347922	2347923	ABCA3	Fatal_surfactant_deficiency	1897-1G>C
chr16	2376494	2376495	ABCA3	Lung_disease,_interstitial	-26-2A>G
chr16	23391724	23391725	SCNN1B	Hypertension,_association_with	1543-17C>T
chr16	23457288	23457289	COG7	COG_subunit_defect	170-7A>G
chr16	28488956	28488957	CLN3	Neuronal_ceroid_lipofuscinosis,_juvenile	1198-1G>T
chr16	31495977	31495978	SLC5A2	Renal_glucosuria	127-16C>A
chr16	50733391	50733392	NOD2	Crohn's_disease,_susceptibility_to,_association_	74-7T>A
chr16	56536739	56536740	BBS2	Bardet-Biedl_syndrome_	805-20A>G
chr16	56903991	56903992	SLC12A3	Gitelman_syndrome	602-16G>A
chr16	56916306	56916307	SLC12A3	Gitelman_syndrome	1568-1G>A
chr16	56919175	56919176	SLC12A3	Gitelman_syndrome	1826-1G>A
chr16	56938300	56938301	SLC12A3	Gitelman_syndrome	2884-6G>A
chr16	58051235	58051236	C16orf57	Poikiloderma,_clericuzio-type_with_neutropenia	504-2A>C
chr16	67976511	67976512	LCAT	Fish_eye_disease	524-22T>C
chr16	68725620	68725621	CDH3	Hypotrichosis_with_juvenile_macular_dystrophy	1796-2A>G
chr16	71609933	71609934	TAT	Tyrosinaemia_2	236-5A>G
chr16	88898509	88898510	GALNS	Mucopolysaccharidosis_IVa	899-1G>C
chr16	88898510	88898511	GALNS	Mucopolysaccharidosis_IVa	899-2A>G
chr17	7125484	7125485	ACADVL	Very_long_chain_acyl-CoA_dehydrogenase_deficiency	753-11T>G
chr17	7125977	7125978	ACADVL	Very_long_chain_acyl-CoA_dehydrogenase_deficiency	879-8T>A
chr17	7127795	7127797	ACADVL	Very_long_chain_acyl-CoA_dehydrogenase_deficiency	1606-3_1606-2delAA
chr17	7579600	7579601	TP53	Li-Fraumeni_syndrome	97-11C>G
chr17	7579617	7579618	TP53	Breast_cancer_?	97-28T>A
chr17	29508725	29508726	NF1	Neurofibromatosis_1	655-2A>T
chr17	29508726	29508727	NF1	Neurofibromatosis_1	655-1G>A
chr17	29508726	29508727	NF1	Neurofibromatosis_1	655-1G>C
chr17	29528052	29528053	NF1	Neurofibromatosis_1	1063-2A>G
chr17	29528053	29528054	NF1	Neurofibromatosis_1	1063-1G>T
chr17	29548859	29548860	NF1	Neurofibromatosis_1	1642-8A>G
chr17	29550459	29550460	NF1	Neurofibromatosis_1	1722-2A>G
chr17	29664374	29664375	NF1	Neurofibromatosis_1	6365-11T>G
chr17	29670022	29670023	NF1	Neurofibromatosis_1	7000-4A>G
chr17	29670024	29670025	NF1	Neurofibromatosis_1	7000-2A>G
chr17	29683475	29683476	NF1	Neurofibromatosis_1	7553-2A>G
chr17	40947439	40947440	WNK4	Hypertension,_in_men,_association_with	2961+40C>T
chr17	41197828	41197829	BRCA1	Breast_cancer_	5468-10C>A
chr17	41219716	41219717	BRCA1	Breast_cancer	4987-5T>A
chr17	41234601	41234602	BRCA1	Breast_cancer_	4186-10G>A
chr17	41243049	41243050	BRCA1	Breast_and/or_ovarian_cancer	4097-1G>A
chr17	41243050	41243051	BRCA1	Breast_cancer	4097-2A>G
chr17	41256983	41256984	BRCA1	Breast_cancer	213-11T>G
chr17	41256984	41256985	BRCA1	Breast_cancer	213-12A>G
chr17	41258550	41258551	BRCA1	Breast_cancer	135-1G>C
chr17	41258550	41258551	BRCA1	Ovarian_cancer	135-1G>T
chr17	41258555	41258556	BRCA1	Breast_cancer	135-6T>G
chr17	42428729	42428730	GRN	Frontotemporal_dementia	836-1G>C
chr17	48247999	48248000	SGCA	Muscular_dystrophy,_limb_girdle	957-1G>T
chr17	48265511	48265512	COL1A1	Osteogenesis_imperfecta_III	3208-2A>C
chr17	48266157	48266158	COL1A1	Osteogenesis_imperfecta_I	3046-2A>G
chr17	48267360	48267361	COL1A1	Osteogenesis_imperfecta_I	2559+1G>A
chr17	48269389	48269390	COL1A1	Osteogenesis_imperfecta	1984-5C>A
chr17	48269389	48269390	COL1A1	Osteogenesis_imperfecta_I	1984-5delC
chr17	48271547	48271548	COL1A1	Osteogenesis_imperfecta_I	1615-4C>A
chr17	73725343	73725344	ITGB4	Epidermolysis_bullosa_with_pyloric_atresia	567-2A>G
chr17	73744918	73744919	ITGB4	Epidermolysis_bullosa_with_pyloric_atresia	3112-3C>T
chr17	73744920	73744921	ITGB4	Epidermolysis_bullosa_with_pyloric_atresia	3112-1G>A
chr17	73748507	73748508	ITGB4	Epidermolysis_bullosa_with_pyloric_atresia	3977-19T>A
chr17	73827318	73827319	UNC13D	Haemophagocytic_lymphohistiocytosis,_familial_	2553+5C>G
chr17	73829127	73829128	UNC13D	Haemophagocytic_lymphohistiocytosis,_atypical_familial	2368-2A>G
chr17	78078350	78078351	GAA	Glycogen_storage_disease_2	-32-3C>A
chr18	19762805	19762806	GATA6	Pancreatic_agenesis	1516+1G>C
chr18	21137181	21137182	NPC1	Niemann-Pick_disease_C	882-28A>T
chr18	21137181	21137182	NPC1	Niemann-Pick_disease_C	882-28A>G
chr18	28663026	28663027	DSC2	Arrhythmogenic_right_ventricular_dysplasia/cardiomyopathy	943-1G>A
chr18	28906835	28906836	DSG1	Striate_palmoplantar_keratoderma	85-1G>A
chr18	28909852	28909853	DSG1	Striate_palmoplantar_keratoderma	373-2A>G
chr18	55233813	55233814	FECH	Protoporphyria,_erythropoietic	464-1G>A
chr18	55233814	55233815	FECH	Protoporphyria,_erythropoietic	464-2A>G
chr18	55233816	55233817	FECH	Protoporphyria,_erythropoietic	464-4A>G
chr18	55321309	55321310	ATP8B1	Intrahepatic_cholestasis,_benign_recurrent	2932-3C>A
chr19	1226450	1226451	STK11	Peutz-Jeghers_syndrome	1109-2A>G
chr19	6685229	6685230	C3	Macular_degeneration,_age_related,_protection_against_	C>G
chr19	7707310	7707311	STXBP2	Hemophagocytic_lymphohistiocytosis_	795-4C>T
chr19	11218065	11218066	LDLR	Hypercholesterolaemia	818-2A>G
chr19	11218066	11218067	LDLR	Hypercholesterolaemia	818-1G>A
chr19	11223943	11223944	LDLR	Hypercholesterolaemia	1187-10G>A
chr19	11559888	11559889	PRKCSH	Polycystic_liver_disease	1341-2A>G
chr19	11559889	11559890	PRKCSH	Polycystic_liver_disease	1341-1G>A
chr19	17949200	17949201	JAK3	Immunodeficiency,_severe_combined	1442-2A>G
chr19	33334873	33334874	SLC7A9	Cystinuria,_type_I/III	978-17G>A
chr19	38991244	38991245	RYR1	Myopathy,_congenital_with_cores	7324-1G>T
chr19	39076729	39076730	RYR1	Central_core_disease	14869-1G>C
chr19	41512791	41512792	CYP2B6	CYP2B6_expression	485-18C>T
chr19	45867814	45867815	ERCC2	Xeroderma_pigmentosum	595-10G>A
chr19	45868416	45868417	ERCC2	Trichothiodystrophy	361-1G>A
chr2	26696436	26696437	OTOF	Deafness,_non-syndromic	3409-2A>C
chr2	32340768	32340769	SPAST	Spastic_paraplegia	871-2A>G
chr2	32353474	32353475	SPAST	Spastic_paraplegia	1174-2A>C
chr2	32353475	32353476	SPAST	Spastic_paraplegia	1174-1G>C
chr2	32353475	32353476	SPAST	Spastic_paraplegia	1174-1G>A
chr2	32353475	32353476	SPAST	Spastic_paraplegia	1174-1G>T
chr2	44528118	44528119	SLC3A1	Cystinuria	1012-23C>G
chr2	47136316	47136317	MCFD2	Factor_V_and_Factor_VIII_deficiency,_combined	-6-1G>C
chr2	47602371	47602372	EPCAM	Congenital_tufting_enteropathy	426-1G>A
chr2	47635537	47635538	MSH2	Colorectal_cancer,_non-polyposis	212-2A>G
chr2	47635538	47635539	MSH2	Colorectal_cancer,_non-polyposis	212-1G>A
chr2	48030556	48030557	MSH6	Colorectal_cancer,_non-polyposis	3173-2A>C
chr2	48032032	48032033	MSH6	Multiple_colorectal_adenoma_	3439-16C>T
chr2	48032754	48032755	MSH6	Colorectal_cancer,_early_onset	3557-2A>G
chr2	48032755	48032756	MSH6	Colorectal_cancer	3557-1G>A
chr2	48033340	48033341	MSH6	Endometrial_cancer	3647-2A>C
chr2	48033341	48033342	MSH6	Colorectal_cancer,_non-polyposis	3647-1G>A
chr2	48033907	48033908	MSH6	Colorectal_cancer,_early_onset_	4002-10T>A
chr2	71778730	71778731	DYSF	Muscular_dystrophy,_limb_girdle_/_Miyoshi_myopathy	1639-6T>A
chr2	71788880	71788881	DYSF	Muscular_dystrophy,_limb_girdle_2B	2163-1G>T
chr2	71817307	71817308	DYSF	Muscular_dystrophy,_limb_girdle_2B	3443-33A>G
chr2	85893866	85893867	SFTPB	Surfactant_protein_B_deficiency	304-2delA
chr2	86479194	86479195	REEP1	Neuropathy,_hereditary_sensory,_type_V	304-2A>G
chr2	98349926	98349927	ZAP70	Immunodeficiency,_late_onset	837+121G>A
chr2	128178841	128178842	PROC	Protein_C_deficiency	71-17C>T
chr2	128180581	128180582	PROC	Protein_C_deficiency	263-28T>G
chr2	166856287	166856288	SCN1A	Dravet_syndrome	4285-2A>G
chr2	166868792	166868793	SCN1A	Myoclonic_epilepsy_of_infancy	3706-1G>A
chr2	166868793	166868794	SCN1A	Dravet_syndrome	3706-2A>G
chr2	166868794	166868795	SCN1A	Dravet_syndrome	3706-3T>G
chr2	169787377	169787378	ABCB11	Intrahepatic_cholestasis,_familial_progressive_2	3214-6C>G
chr2	169873309	169873310	ABCB11	Intrahepatic_cholestasis,_familial_progressive_2_	77-1G>A
chr2	189856392	189856393	COL3A1	Ehlers-Danlos_syndrome_IV	898-2A>C
chr2	189866176	189866177	COL3A1	Ehlers-Danlos_syndrome_IV	2337+1G>A
chr2	189866177	189866178	COL3A1	Ehlers-Danlos_syndrome_IV	2337+2T>C
chr2	189912989	189912990	COL5A2	Ehlers-Danlos_syndrome	3148-2A>G
chr2	191161681	191161682	HIBCH	Neurodegeneration,_progressive_infantile	79-3C>G
chr2	203332240	203332241	BMPR2	Pulmonary_hypertension,_primary	248-1G>A
chr2	203397304	203397305	BMPR2	Pulmonary_hypertension,_primary	1129-3C>G
chr2	211452774	211452775	CPS1	Carbamoyl_phosphate_synthetase_I_deficiency	622-7A>G
chr2	219679266	219679267	CYP27A1	Cerebrotendinous_xanthomatosis	1264-1G>A
chr2	219679266	219679267	CYP27A1	Cerebrotendinous_xanthomatosis	1264-1G>T
chr2	220284970	220284971	DES	Myopathy,_desmin_related	640-2A>C
chr2	220284970	220284971	DES	Cardiomyopathy,_dilated	640-2A>G
chr2	220284970	220284971	DES	Myopathy,_desmin_related	640-2A>T
chr2	220284971	220284972	DES	Myopathy,_desmin_related	640-1G>A
chr2	225368539	225368540	CUL3	Pseudohypoaldosteronism_type_II	1207-1G>A
chr2	225368550	225368551	CUL3	Pseudohypoaldosteronism_type_II	1207-12T>G
chr2	228157905	228157906	COL4A3	Alport_syndrome	3211-1G>T
chr20	3193892	3193893	ITPA	ITPase_deficiency,_association_with	124+21A>C
chr20	10629766	10629767	JAG1	Alagille_syndrome	1349-12T>G
chr20	43248502	43248503	ADA	Immunodeficiency,_severe_combined	1079-15T>A
chr20	52779402	52779403	CYP24A1	Hypercalcaemia,_hypercalciuria_&_elevated_calcitriol_concentrations	845-2A>G
chr20	57484214	57484215	GNAS	Albright_hereditary_osteodystrophy	531-2A>G
chr20	57484215	57484216	GNAS	Pseudohypoparathyroidism_1a	531-1G>C
chr20	61449867	61449868	COL9A3	Multiple_epiphyseal_dysplasia	148-2A>T
chr20	61449867	61449868	COL9A3	Multiple_epiphyseal_dysplasia	148-2A>G
chr20	61449868	61449869	COL9A3	Multiple_epiphyseal_dysplasia	148-1G>A
chr21	33040772	33040773	SOD1	Amyotrophic_lateral_sclerosis	358-11A>G
chr21	41434840	41434841	DSCAM	Bipolar_disorder,_association_with_	4889-15A>G
chr21	44486487	44486488	CBS	Homocystinuria	317-1G>C
chr21	45712874	45712875	AIRE	APECED	1096-1G>A
chr21	45712874	45712875	AIRE	APECED	1096-1G>C
chr22	24919585	24919586	UPB1	Ureidopropionase_deficiency	917-1G>A
chr22	30074182	30074183	NF2	Neurofibromatosis_2	1447-2A>G
chr22	30074182	30074183	NF2	Neurofibromatosis_2	1447-2delA
chr22	30074183	30074184	NF2	Neurofibromatosis_2_	1447-1G>T
chr22	30074183	30074184	NF2	Neurofibromatosis_2_	1447-1G>A
chr22	30090739	30090740	NF2	Neurofibromatosis_2	1738-1G>C
chr22	32500770	32500771	SLC5A1	Glucose_/_galactose_malabsorption	1666-2delA
chr22	43023695	43023696	CYB5R3	Methaemoglobinaemia_2	464-2A>C
chr22	51064120	51064121	ARSA	Metachromatic_leukodystrophy	1108-12C>G
chr22	51064580	51064581	ARSA	Metachromatic_leukodystrophy	979+1G>A
chr22	51065260	51065261	ARSA	Metachromatic_leukodystrophy	684+1G>A
chr3	10083304	10083305	FANCD2	Fanconi_anaemia	696-2A>T
chr3	10106033	10106034	FANCD2	Fanconi_anaemia	1948-6C>A
chr3	30686236	30686237	TGFBR2	Loeys-Dietz_aortic_aneurysm_syndrome	95-2A>G
chr3	37042442	37042443	MLH1	Colorectal_cancer,_non-polyposis	208-3C>G
chr3	37042443	37042444	MLH1	Colorectal_cancer,_non-polyposis	208-2A>G
chr3	37042444	37042445	MLH1	Colorectal_cancer,_non-polyposis	208-1G>A
chr3	37053491	37053492	MLH1	Colorectal_cancer,_non-polyposis	589-10T>A
chr3	37053499	37053500	MLH1	Colorectal_cancer,_non-polyposis	589-2A>G
chr3	37055919	37055921	MLH1	Colorectal_cancer,_non-polyposis	678-3_678-2delTA
chr3	37055921	37055922	MLH1	Colorectal_cancer,_non-polyposis	678-1G>T
chr3	37055921	37055922	MLH1	Colorectal_cancer,_non-polyposis	678-1G>C
chr3	38647641	38647642	SCN5A	Longer_QT_interval,_association_with	1141-3C>A
chr3	38671943	38671944	SCN5A	Brugada_syndrome	274-24C>T
chr3	39432929	39432930	SLC25A38	Sideroblastic_anaemia___	277-2A>G
chr3	46942900	46942901	PTH1R	Nonsyndromic_primary_failure_of_tooth_eruption	1050-3C>G
chr3	48604170	48604171	COL7A1	Epidermolysis_bullosa	8227-1G>C
chr3	48616970	48616971	COL7A1	Epidermolysis_bullosa_dystrophica	5236-23A>G
chr3	48629902	48629903	COL7A1	Epidermolysis_bullosa_dystrophica	977-3C>A
chr3	87313662	87313664	POU1F1	Pituitary_hormone_deficiency	215-2dupA
chr3	93603748	93603749	PROS1	Protein_S_deficiency	1324-9A>G
chr3	93619774	93619775	PROS1	Protein_S_deficiency	602-2A>T
chr3	93619778	93619779	PROS1	Protein_S_deficiency_	602-6T>C
chr3	130650864	130650865	ATP2C1	Hailey-Hailey_disease	118-1G>A
chr3	130653463	130653464	ATP2C1	Hailey-Hailey_disease	235-2A>G
chr3	130711792	130711794	ATP2C1	Hailey-Hailey_disease_	1840-2_1840-1insT
chr3	136019869	136019870	PCCB	Propionic_acidaemia	885-2A>G
chr3	148920029	148920030	CP	Aceruloplasminaemia	1209-2A>G
chr3	158402310	158402312	GFM1	Combined_oxidative_phosphorylation_deficiency	1765-2_1765-1delAG
chr3	165504106	165504107	BCHE	Butyrylcholinesterase_deficiency	1518-8T>G
chr3	180365033	180365034	CCDC39	Primary_ciliary_dyskinesia__	1363-3delC
chr3	180377369	180377370	CCDC39	Primary_ciliary_dyskinesia__	610-2A>G
chr3	183855940	183855941	EIF2B5	Leukoencephalopathy_with_vanishing_white_matter	685-13C>G
chr3	190120120	190120121	CLDN16	Hypomagnesemia_with_hypercalciuria_and_nephrocalcinosis	325-5T>G
chr3	190127677	190127678	CLDN16	Hypomagnesemia_with_hypercalciuria_and_nephrocalcinosis	785-14T>G
chr3	193360551	193360552	OPA1	Optic_atrophy_1	985-2A>G
chr3	193360552	193360553	OPA1	Optic_atrophy_1	985-1G>A
chr3	193361233	193361234	OPA1	Optic_atrophy_1	1212+1G>A
chr3	193361233	193361234	OPA1	Optic_atrophy_1	1212+1G>T
chr3	193361234	193361235	OPA1	Optic_atrophy_1	1212+2T>G
chr3	193361234	193361236	OPA1	Optic_atrophy__	1212+2dupT
chr3	193384075	193384076	OPA1	Optic_atrophy_1	2614-9A>G
chr3	193384948	193384949	OPA1	Optic_atrophy_1	2708-10C>G
chr4	43022361	43022362	GRXCR1	Hearing_impairment,_nonsyndromic,_autosomal_recessive	628-9C>A
chr4	77089630	77089631	SCARB2	Myoclonus_epilepsy_without_renal_failure	1114-2A>C
chr4	88578182	88578183	DMP1	Rickets,_hypophosphataemic,_autosomal_recessive	55-1G>C
chr4	88957369	88957370	PKD2	Polycystic_kidney_disease_2	710-2A>G
chr4	100512804	100512805	MTTP	Abetalipoproteinaemia	619-3T>G
chr4	100522735	100522736	MTTP	Abetalipoproteinaemia	1237-28A>G
chr4	100522762	100522763	MTTP	Abetalipoproteinaemia	1237-1G>A
chr4	102750921	102750922	BANK1	Systemic_lupus_erythematosus,_protection_against,_association	71-43T>C
chr4	103556203	103556204	MANBA	Mannosidosis,_beta,_lysosomal	2158-2A>G
chr4	108954329	108954330	HADH	Hypoglycaemia,_hyperinsulinaemic	710-2A>G
chr4	122775976	122775977	BBS7	Bardet-Biedl_syndrome	602-2A>T
chr4	159606243	159606244	ETFDH	Lipid_storage_myopathy	488-9T>C
chr4	187196938	187196939	F11	Factor_XI_deficiency	486-2A>G
chr5	14713779	14713780	ANKH	Craniometaphyseal_dysplasia	1142-4A>G
chr5	35860951	35860952	IL7R	Immunodeficiency,_severe_combined,_atypical	83-2A>G
chr5	35860951	35860952	IL7R	Immunodeficiency,_severe_combined	83-2A>T
chr5	36970971	36970972	NIPBL	Cornelia_de_Lange_syndrome	611-6T>C
chr5	43619132	43619133	NNT	Glucocorticoid_deficiency	600-1delG
chr5	76028124	76028125	F2R	Low_platelet_receptor_density,_association_with	89-14A>T
chr5	86629074	86629075	RASA1	Capillary_malformations	829-9G>A
chr5	94848323	94848324	TTC37	Trichohepatoenteric_syndrome	2779-2A>G
chr5	112136974	112136975	APC	Adenomatous_polyposis_coli	730-1G>T
chr5	112151183	112151184	APC	Adenomatous_polyposis_coli	835-8A>G
chr5	112151184	112151185	APC	Adenomatous_polyposis_coli	835-7T>G
chr5	112162798	112162799	APC	Adenomatous_polyposis_coli	1409-6A>G
chr5	112162799	112162800	APC	Adenomatous_polyposis_coli	1409-5A>G
chr5	112163617	112163618	APC	Adenomatous_polyposis_coli	1549-8A>C
chr5	135235605	135235606	IL9	Atopic_dermatitis,_increased_susceptibility,_assoc_with	G>A
chr5	147465965	147465966	SPINK5	Netherton_syndrome	283-2A>T
chr5	149740716	149740717	TCOF1	Treacher-Collins_syndrome	109-2A>T
chr5	149748276	149748277	TCOF1	Treacher-Collins_syndrome	379-2A>G
chr5	176671193	176671194	NSD1	Sotos_syndrome	4303-2A>G
chr5	176671194	176671195	NSD1	Sotos_syndrome	4303-1G>A
chr5	176671194	176671195	NSD1	Sotos_syndrome	4303-1G>C
chr5	176678728	176678729	NSD1	Sotos_syndrome	4642-2A>T
chr6	7574317	7574318	DSP	Cardiomyopathy,_arrhythmogenic_right_ventricular	2131-1G>A
chr6	32006496	32006497	CYP21A2	Adrenal_hyperplasia	203-2A>G
chr6	32008361	32008362	CYP21A2	Adrenal_hyperplasia	1118+1G>A
chr6	42933847	42933848	PEX6	Zellweger_syndrome	2301-5C>G
chr6	42933857	42933858	PEX6	Zellweger_syndrome	2301-15C>G
chr6	42942777	42942778	PEX6	Zellweger_syndrome_C	883-2A>G
chr6	51887742	51887743	PKHD1	Polycystic_kidney_disease	5237-1G>A
chr6	110036279	110036280	FIG4	Amyotrophic_lateral_sclerosis	67-1G>T
chr7	6043424	6043425	PMS2	Colorectal_cancer,_non-polyposis	251-2A>C
chr7	6043424	6043425	PMS2	Colorectal_cancer,_non-polyposis	251-2A>G
chr7	95926263	95926264	SLC25A13	Citrullinaemia,_adult_onset,_type_II	16-1G>A
chr7	103062015	103062016	SLC26A5	Deafness,_non-syndromic	-53-2A>G
chr7	107303738	107303739	SLC26A4	Deafness,_non-syndromic,_autosomal_recessive	165-2A>G
chr7	107303739	107303740	SLC26A4	Pendred_syndrome	165-1G>A
chr7	107323881	107323882	SLC26A4	Hearing_loss_	919-18T>G
chr7	107329493	107329494	SLC26A4	Pendred_syndrome	1002-4C>G
chr7	107340520	107340521	SLC26A4	Deafness,_non-syndromic,_autosomal_recessive_	1615-7A>G
chr7	107418726	107418727	SLC26A3	Diarrhoea,_congenital_chloride	1408-1G>C
chr7	117149077	117149078	CFTR	Cystic_fibrosis_	165-10T>G
chr7	117180150	117180151	CFTR	Cystic_fibrosis	870-3T>G
chr7	117180152	117180153	CFTR	Congenital_absence_of_vas_deferens	870-1G>C
chr7	117182064	117182065	CFTR	Cystic_fibrosis_	1117-5A>G
chr7	117188692	117188693	CFTR	Cystic_fibrosis	1210-2A>C
chr7	117188692	117188694	CFTR	Cystic_fibrosis	1210-2_1210-1delAG
chr7	117227773	117227774	CFTR	Hypertrypsinaemia,_neonatal	1585-19T>C
chr7	117306941	117306942	CFTR	Pancreatitis,_chronic_	4243-20A>G
chr7	120480163	120480164	TSPAN12	Exudative_vitreoretinopathy	67-1G>C
chr7	142655061	142655062	KEL	K(null)_phenotype	526-2A>G
chr7	147183025	147183026	CNTNAP2	Mental_retardation,_Pitt-Hopkins-like	1671-1G>T
chr7	150646164	150646165	KCNH2	Long_QT_syndrome	2399-28A>G
chr7	150655596	150655597	KCNH2	Long_QT_syndrome	473-7C>A
chr8	11640661	11640662	NEIL2	Multiple_colorectal_adenoma_	492-50G>C
chr8	16012653	16012654	MSR1	Prostate_cancer	818-1G>A
chr8	16012709	16012710	MSR1	Prostate_cancer,_association_with	818-57C>A
chr8	21977403	21977404	HR	Congenital_atrichia	2847-1G>A
chr8	21977403	21977405	HR	Atrichia_with_papular_lesions	2847-2_2847-1delAG
chr8	21977405	21977406	HR	Atrichia_with_papular_lesions	2847-3C>G
chr8	30925772	30925773	WRN	Werner_syndrome	655-1G>A
chr8	30999195	30999196	WRN	Werner_syndrome	3139-1G>C
chr8	38003675	38003676	STAR	Congenital_lipoid_adrenal_hyperplasia	466-11T>A
chr8	41526115	41526116	ANK1	Spherocytosis	5097-34C>T
chr8	61748629	61748630	CHD7	CHARGE_syndrome	3779-2A>G
chr8	61765054	61765055	CHD7	CHARGE_syndrome	5895-2A>G
chr8	94793099	94793100	TMEM67	Meckel_syndrome	870-2A>G
chr8	94809556	94809557	TMEM67	COACH_syndrome	1961-2A>C
chr8	100115178	100115179	VPS13B	Cohen_syndrome	413-2A>G
chr8	100732570	100732571	VPS13B	Cohen_syndrome	6733-2A>G
chr8	118825200	118825201	EXT1	Multiple_osteochondromas	1633-1G>C
chr8	118825201	118825202	EXT1	Multiple_exostoses	1633-2A>G
chr8	118825201	118825202	EXT1	Multiple_exostoses	1633-2delA
chr8	118825225	118825226	EXT1	Multiple_exostoses_	1633-26C>A
chr8	145639480	145639481	SLC39A4	Acrodermatitis_enteropathica	1150-2A>G
chr9	21968242	21968243	CDKN2A	Melanoma	458-2A>C
chr9	34647565	34647566	GALT	Galactosaemia	328+2T>C
chr9	34648328	34648329	GALT	Galactosaemia	565-2A>G
chr9	36236984	36236985	GNE	Myopathy,_distal,_with_rimmed_vacuoles	617-4A>G
chr9	37782145	37782146	EXOSC3	Pontocerebellar_hypoplasia_1	475-12A>G
chr9	77403659	77403660	TRPM6	Hypomagnesaemia_with_secondary_hypocalcaemia	2539-2A>T
chr9	94118438	94118439	AUH	3-Methylglutaconic_aciduria_type_1	263-2A>G
chr9	98212223	98212224	PTCH1	Nevoid_basal_cell_carcinoma_syndrome	3450-2A>G
chr9	98244323	98244324	PTCH1	Nevoid_basal_cell_carcinoma_syndrome	655-2A>T
chr9	100449554	100449555	XPA	Xeroderma_pigmentosum_(A)	390-12A>G
chr9	107564465	107564466	ABCA1	Alzheimer's_disease,_association_with_	4593-26G>C
chr9	107582351	107582352	ABCA1	Tangier_disease	2961-2A>C
chr9	107588169	107588171	ABCA1	Reduced_plasma_HDL_cholesterol	2338-3_2338-2delCA
chr9	127265501	127265502	NR5A1	XY_gonadal_dysgenesis	103-3C>A
chr9	130588140	130588141	ENG	Haemorrhagic_telangiectasia_1	524-2A>G
chr9	130588952	130588953	ENG	Haemorrhagic_telangiectasia_1	361-2A>C
chr9	130588952	130588953	ENG	Haemorrhagic_telangiectasia_1	361-2A>G
chr9	133376361	133376362	ASS1	Citrullinaemia	1194-1G>C
chr9	136219463	136219464	SURF1	Cytochrome_c_oxidase_deficiency	589-1G>C
chr9	137622079	137622080	COL5A1	Ehlers-Danlos_syndrome	925-2A>G
chr9	137686902	137686903	COL5A1	Ehlers-Danlos_syndrome_II	2701-25T>G
chrX	605122	605123	SHOX	Short_stature	634-3C>T
chrX	13738102	13738103	TRAPPC2	Spondyloepiphyseal_dysplasia_tarda	-19-2A>C
chrX	13738102	13738103	TRAPPC2	Spondyloepiphyseal_dysplasia_tarda	-19-2A>G
chrX	13757117	13757118	OFD1	Oral-facial-digital_syndrome_1	382-3C>G
chrX	13757118	13757119	OFD1	Oral-facial-digital_syndrome_1	382-2A>G
chrX	18972530	18972531	PHKA2	Liver_glycogenosis_1	79-1G>T
chrX	19377032	19377033	PDHA1	Pyruvate_dehydrogenase_deficiency	900-1G>A
chrX	20213263	20213264	RPS6KA3	Coffin-Lowry_syndrome	326-1G>C
chrX	21863282	21863283	MBTPS2	Ichthyosis_follicularis,_atrichia_&_photophobia	225-6T>A
chrX	22129582	22129583	PHEX	Rickets,_hypophosphataemic	1080-2A>G
chrX	31198599	31198600	DMD	Muscular_dystrophy,_Duchenne	9975-2A>G
chrX	31241239	31241240	DMD	Muscular_dystrophy,_Duchenne	9287-2A>G
chrX	32398798	32398799	DMD	Muscular_dystrophy,_Duchenne	4675-2A>G
chrX	32404586	32404587	DMD	Muscular_dystrophy,_Becker	4519-5C>G
chrX	32584000	32584001	DMD	Muscular_dystrophy_	1813-3C>A
chrX	32591761	32591762	DMD	Muscular_dystrophy,_Becker_	1705-8T>C
chrX	32614000	32614001	DMD	Muscular_dystrophy,_Becker	1483-8T>G
chrX	32841504	32841505	DMD	Muscular_dystrophy,_Duchenne	265-1G>C
chrX	32841505	32841506	DMD	Muscular_dystrophy,_Duchenne	265-2A>G
chrX	37586886	37586887	XK	McLeod_syndrome	509-2A>G
chrX	37651219	37651220	CYBB	Chronic_granulomatous_disease	253-8A>G
chrX	37664247	37664248	CYBB	Chronic_granulomatous_disease	1152-11T>G
chrX	38156706	38156707	RPGR	Retinitis_pigmentosa	1246-2A>C
chrX	38229047	38229048	OTC	Ornithine_transcarbamylase_deficiency	217-1G>A
chrX	39921646	39921647	BCOR	Oculofaciocardiodental_syndrome	4072-1G>T
chrX	48370667	48370668	PORCN	Focal_dermal_hypoplasia	374-46T>A
chrX	48372625	48372626	PORCN	Focal_dermal_hypoplasia	720-2A>T
chrX	48542669	48542670	WAS	Wiskott-Aldrich_syndrome	133-2A>G
chrX	48542670	48542671	WAS	Wiskott-Aldrich_syndrome	133-1G>C
chrX	48546441	48546442	WAS	Wiskott-Aldrich_syndrome	735-1G>A
chrX	49087072	49087073	CACNA1F	Night_blindness,_congenital_stationary,_incomplete	522-2A>G
chrX	66905848	66905849	AR	Androgen_insensitivity_syndrome	1769-3C>G
chrX	66905849	66905850	AR	Androgen_insensitivity_syndrome	1769-2A>C
chrX	66905850	66905851	AR	Androgen_insensitivity_syndrome	1769-1G>A
chrX	69255204	69255205	EDA	Ectodermal_dysplasia,_hypohidrotic	925-3C>G
chrX	73744192	73744193	SLC16A2	Monocarboxylate_transporter_8_deficiency	798-1G>C
chrX	76764108	76764109	ATRX	ATRX_syndrome,_atypical	7201-2A>G
chrX	77264597	77264598	ATP7A	Menkes_syndrome	1708-1G>C
chrX	77270156	77270157	ATP7A	Menkes_syndrome	2407-2A>G
chrX	85119826	85119827	CHM	Choroideraemia	1771-1G>A
chrX	85134069	85134070	CHM	Choroideraemia	1511-2A>G
chrX	100609704	100609705	BTK	Agammaglobulinaemia	1567-23A>G
chrX	100615750	100615751	BTK	Agammaglobulinaemia	589-8C>G
chrX	100615751	100615752	BTK	Agammaglobulinaemia	589-9A>G
chrX	105279377	105279378	SERPINA7	Thyroxine-binding_globulin_deficiency	623-2A>G
chrX	107826112	107826113	COL4A5	Alport_syndrome	937-1G>A
chrX	107838737	107838738	COL4A5	Alport_syndrome	1424-1G>A
chrX	107910353	107910354	COL4A5	Alport_syndrome	3554-9C>G
chrX	107910359	107910360	COL4A5	Alport_syndrome	3554-3C>G
chrX	107910361	107910362	COL4A5	Alport_syndrome	3554-1G>A
chrX	128674706	128674707	OCRL	Dent_disease	40-14A>G
chrX	128696349	128696350	OCRL	Lowe_oculocerebrorenal_syndrome	940-11G>A
chrX	133512026	133512027	PHF6	Borjeson-Forssman-Lehmann_syndrome	139-8A>G
chrX	133620492	133620493	HPRT1	Lesch-Nyhan_syndrome	319-2A>G
chrX	133632418	133632419	HPRT1	Lesch-Nyhan_syndrome	486-1G>A
chrX	133634057	133634058	HPRT1	Lesch-Nyhan_syndrome	610-2A>G
chrX	133634057	133634058	HPRT1	Lesch-Nyhan_syndrome	610-2A>T
chrX	133634058	133634059	HPRT1	Lesch-Nyhan_syndrome	610-1G>A
chrX	135741196	135741197	CD40LG	Hyper-IgM_syndrome	410-1G>T
chrX	135741196	135741197	CD40LG	Hyper-IgM_syndrome	410-1delG
chrX	138619495	138619496	F9	Haemophilia_B	253-25A>G
chrX	138619495	138619496	F9	Haemophilia_B	253-25A>T
chrX	138619510	138619511	F9	Haemophilia_B	253-10T>G
chrX	138619517	138619518	F9	Haemophilia_B	253-3T>G
chrX	138619518	138619519	F9	Haemophilia_B	253-2A>G
chrX	138619519	138619520	F9	Haemophilia_B	253-1G>C
chrX	138619519	138619520	F9	Haemophilia_B	253-1G>A
chrX	138623221	138623222	F9	Haemophilia_B	278-13A>G
chrX	138623222	138623223	F9	Haemophilia_B	278-12C>T
chrX	138623222	138623223	F9	Haemophilia_B	278-12C>G
chrX	138643678	138643679	F9	Haemophilia_B	839-4A>G
chrX	138643680	138643681	F9	Haemophilia_B	839-2A>C
chrX	138643681	138643682	F9	Haemophilia_B	839-1G>A
chrX	148564763	148564764	IDS	Mucopolysaccharidosis_II	1181-15C>A
chrX	148568636	148568637	IDS	Mucopolysaccharidosis_II	1007-8T>G
chrX	148585019	148585020	IDS	Mucopolysaccharidosis_II	241-1G>A
chrX	148585020	148585021	IDS	Mucopolysaccharidosis_II	241-2A>G
chrX	148585021	148585022	IDS	Mucopolysaccharidosis_II	241-3C>G
chrX	148585028	148585029	IDS	Mucopolysaccharidosis_II	241-10T>G
chrX	149767044	149767045	MTM1	Myotubular_myopathy	137-11T>A
chrX	149767051	149767052	MTM1	Myotubular_myopathy	137-4A>G
chrX	149767052	149767053	MTM1	Myotubular_myopathy	137-3T>A
chrX	149767053	149767054	MTM1	Myotubular_myopathy	137-2A>T
chrX	149809740	149809741	MTM1	Myotubular_myopathy,_X-linked	529-1G>T
chrX	149828126	149828127	MTM1	Myotubular_myopathy	1261-10A>G
chrX	153001796	153001797	ABCD1	Adrenoleukodystrophy	1225-2A>G
chrX	153001796	153001797	ABCD1	Adrenoleukodystrophy	1225-2A>C
chrX	153002608	153002609	ABCD1	Adrenoleukodystrophy	1394-2A>G
chrX	153128845	153128846	L1CAM	Hydrocephalus,_MASA	3531-12G>A
chrX	153135389	153135390	L1CAM	Hydrocephalus,_X-linked	992-1G>A
chrX	153135700	153135701	L1CAM	Hydrocephalus,_X-linked	807-6G>A
chrX	153760678	153760679	G6PD	Glucose-6-phosphate_dehydrogenase_deficiency	1288-2A>G
chrX	154091515	154091516	F8	Haemophilia_A	6430-14A>G
chrX	154124511	154124512	F8	Haemophilia_A	6274-5G>A
chrX	154124514	154124515	F8	Haemophilia_A	6274-8A>G
chrX	154130442	154130444	F8	Haemophilia_A	5999-2_5999-1delAG
chrX	154130443	154130444	F8	Haemophilia_A	5999-2A>C
chrX	154132800	154132801	F8	Haemophilia_A	5587-2A>G
chrX	154132800	154132801	F8	Haemophilia_A	5587-2A>T
chrX	154133298	154133299	F8	Haemophilia_A	5374-1G>C
chrX	154133298	154133299	F8	Haemophilia_A	5374-1G>A
chrX	154133299	154133300	F8	Haemophilia_A	5374-2A>T
chrX	154182317	154182318	F8	Haemophilia_A	1753-1G>A
chrX	154182318	154182319	F8	Haemophilia_A	1753-2A>G
chrX	154185463	154185464	F8	Haemophilia_A	1538-18G>A
chrX	154215611	154215612	F8	Haemophilia_A	602-32A>G
chrX	154221438	154221439	F8	Haemophilia_A	389-16T>G

## Sheet: COSMIC_knownBP
Chromsome	Start	Stop	Disease	Variation
chr12	31254760	31254761	carcinoma	c.2053-6C>G
chr11	61734851	61734852	malignant_melanoma	c.46G>T
chr11	65632480	65632481	malignant_melanoma	c.1273-7C>T
chr3	122864944	122864945	carcinoma	c.982-1G>A
chr2	55277404	55277405	carcinoma	c.32C>T
chr17	29554204	29554205	carcinoma	c.2252-31A>G
chr17	29554204	29554205	carcinoma	c.2252-31A>T
chr17	7579374	7579375	adrenal_cortical_adenoma	c.312G>C
chr17	7579374	7579375	carcinoma	c.312delG

## Sheet: COSMIC_motif
Chromsome	Start	Stop	Disease	Variation
chr12	49446987	49446988	lymphoid_neoplasm	c.954+2T>G
chr19	12768874	12768875	lymphoid_neoplasm	c.1309+2T>A
chr1	17085167	17085168	carcinoma	c.1300+3T>A
chr1	249149746	249149747	carcinoma	c.959+10A>G
chr12	31254760	31254761	carcinoma	c.2053-6C>G
chr2	114391720	114391721	carcinoma	c.138-9T>C
chr22	50960681	50960682	carcinoma	c.1233+2C>T
chrX	117815649	117815650	carcinoma	c.5863-7G>A
chr22	51018401	51018402	NS	c.927+1G>C
chr9	98241430	98241431	carcinoma	c.1068-2A>T
chr5	432576	432577	carcinoma	c.963-1G>A
chr11	65632480	65632481	malignant_melanoma	c.1273-7C>T
chr13	98666288	98666289	carcinoma	c.2207-7A>G
chr20	47872506	47872507	carcinoma	c.2085C>G
chr3	122864944	122864945	carcinoma	c.982-1G>A
chr6	31237322	31237323	other	c.1016-3T>C
chr17	29554204	29554205	carcinoma	c.2252-31A>G
chr17	29554204	29554205	carcinoma	c.2252-31A>T
chr5	432576	432577	carcinoma	c.975-1G>A
chr10	89720621	89720622	carcinoma	c.802-29T>C
chr12	56553368	56553369	carcinoma	c.32-2A>G
chr3	101574575	101574576	carcinoma	c.1655-1G>T

## Sheet: COSMIC_predictedMotif
Chromsome	Start	Stop	Disease	Variation
chr1	146673087	146673088	carcinoma	831-2A>C
chr1	10405900	10405901	carcinoma	3551-2A>C
chr1	19612492	19612493	carcinoma	403-7T>C
chr1	161823010	161823011	carcinoma	1434-3T>A
chr1	225586751	225586752	carcinoma	10309-4A>T
chr1	177249542	177249543	haematopoietic_neoplasm	1236-5C>A
chr1	52962855	52962856	malignant_melanoma	1000-1G>A
chr1	153713117	153713118	malignant_melanoma	151-9C>T
chr1	156533106	156533107	malignant_melanoma	620-3C>T
chr1	202698303	202698304	malignant_melanoma	4498-3C>T
chr1	202698304	202698305	malignant_melanoma	4498-4C>T
chr1	205817107	205817108	malignant_melanoma	170-9C>T
chr1	109392206	109392207	carcinoma	994-9A>G
chr1	15623172	15623173	carcinoma	569-7G>A
chr1	52282065	52282066	carcinoma	1566-5A>T
chr1	44019461	44019462	carcinoma	208-9C>T
chr1	28220910	28220911	carcinoma	526-3C>T
chr1	28220910	28220911	carcinoma	790-3C>T
chr1	229676502	229676503	carcinoma	1057-4C>A
chr1	17320336	17320337	malignant_melanoma	1543-7C>T
chr1	51768170	51768171	malignant_melanoma	939+7C>T
chr1	150234555	150234556	carcinoma	257-1G>A
chr1	207317161	207317162	primitive_neuroectodermal_tumour-medulloblastoma	1445-1G>A
chr10	70725127	70725128	carcinoma	787-5A>G
chr10	71640254	71640255	carcinoma	436-4G>A
chr10	73544637	73544638	carcinoma	5518-10A>G
chr10	75000697	75000698	carcinoma	1676-6T>C
chr10	68040384	68040385	malignant_melanoma	1733-6T>C
chr10	68040384	68040385	malignant_melanoma	1733-6T>C
chr10	89685267	89685268	glioma	165-2delA
chr10	89690789	89690790	carcinoma	210-13A>G
chr10	89717518	89717519	carcinoma	635-91G>C
chr10	89685206	89685207	malignant_melanoma	165-63A>T
chr10	89717600	89717601	glioma	635-9A>G
chr10	89717597	89717598	glioma	635-12T>G
chr10	89685268	89685269	carcinoma	165-1G>T
chr10	89685267	89685268	lymphoid_neoplasm,glioma	165-2A>C
chr10	89685268	89685269	carcinoma,glioma	165-1G>A
chr10	35328010	35328011	carcinoma	715-1G>A
chr10	89685268	89685269	carcinoma	165-1G>C
chr11	94328473	94328474	malignant_melanoma	1151-1G>A
chr11	49179596	49179597	carcinoma	1441-2A>G
chr11	108139126	108139127	lymphoid_neoplasm	2639-10T>G
chr11	62592042	62592043	malignant_melanoma	680-6C>T
chr11	17177185	17177186	carcinoma	1066-10T>G
chr11	118370015	118370016	other	5953-2A>G
chr11	121459965	121459966	carcinoma	3947-2A>T
chr11	119059711	119059712	carcinoma	1246-2A>C
chr12	46287411	46287412	carcinoma	5272-1G>A
chr12	57496280	57496281	lymphoid_neoplasm	1306-2A>G
chr12	58127966	58127967	carcinoma	392-9C>T
chr12	122674666	122674667	NS	108-10C>G
chr12	14792891	14792892	malignant_melanoma	2069-8C>T
chr12	40668648	40668649	malignant_melanoma	1802-7T>A
chr12	40668648	40668649	malignant_melanoma	1802-7T>A
chr12	118481186	118481187	carcinoma	183-5C>G
chr12	62928621	62928622	other	1634-3A>T
chr12	121426633	121426634	other	327-2A>T
chr12	114282601	114282602	malignant_melanoma	2665-9C>T
chr12	113601082	113601083	glioma	1939-4C>G
chr12	121426634	121426635	other	327-1G>T
chr12	120518689	120518690	carcinoma	1309-1G>C
chr13	42703681	42703682	carcinoma	304-6T>C
chr13	49051480	49051481	carcinoma	2664-10T>A
chr13	75884289	75884290	carcinoma	2384-3C>T
chr13	77792097	77792098	carcinoma	2826-6dela
chr13	39452963	39452964	malignant_melanoma	8860-4A>G
chr13	32893206	32893207	carcinoma	68-7delT
chr13	49047494	49047495	glioma	2490-1G>C
chr13	28124628	28124629	glioma	1779-1G>A
chr14	63453905	63453906	carcinoma	434-1G>A
chr14	67147815	67147816	carcinoma	65-9T>C
chr14	77245285	77245286	carcinoma	1026-3C>T
chr14	23457231	23457232	malignant_melanoma	1085-8C>T
chr14	65235841	65235842	malignant_melanoma	5938-6C>T
chr14	90745484	90745485	carcinoma	3298-8C>T
chr14	20848635	20848636	carcinoma	4763-2A>G
chr14	96794873	96794874	carcinoma	1975-2A>T
chr14	52534881	52534882	carcinoma	229-1G>C
chr15	74476339	74476340	carcinoma	1167-10C>G
chr15	91034558	91034559	carcinoma	4249-6C>G
chr15	43545839	43545840	malignant_melanoma	556-8C>T
chr15	43545840	43545841	malignant_melanoma	556-9C>T
chr15	84233883	84233884	NS	139-2A>C
chr15	33066555	33066556	carcinoma	4216-1G>C
chr16	67572727	67572728	carcinoma	257+1G>C
chr16	72160031	72160032	carcinoma	2089-1G>A
chr16	72160032	72160033	carcinoma	2089-2A>G
chr16	68846035	68846036	carcinoma	1009-2A>C
chr16	15835527	15835528	carcinoma	2653-2A>C
chr16	15098036	15098037	malignant_melanoma	243-7T>C
chr16	3721792	3721793	malignant_melanoma	1166-1G>A
chr16	50655506	50655507	carcinoma	260-6C>T
chr16	30529026	30529027	carcinoma	3033+1G>T
chr16	65026937	65026938	carcinoma	524-1G>T
chr17	40950186	40950187	carcinoma	215-2A>G
chr17	56348229	56348230	carcinoma	2031-6A>C
chr17	29182158	29182159	carcinoma	2451-2A>T
chr17	11568148	11568149	malignant_melanoma	2596-1G>A
chr17	56353069	56353070	malignant_melanoma	1205-7C>T
chr17	29528053	29528054	malignant_melanoma	1063-1G>A
chr17	46867472	46867473	carcinoma	259-5C>A
chr17	46867472	46867473	carcinoma	1081-5C>A
chr17	48433132	48433133	carcinoma	1089-9T>C
chr17	29508726	29508727	neurofibroma	655-1G>T
chr17	29508726	29508727	neurofibroma	655-1G>A
chr17	11984671	11984672	carcinoma	219-1G>C
chr17	7578312	7578313	carcinoma	560-24T>G
chr17	7578310	7578311	glioma	560-22A>G
chr18	12635101	12635102	carcinoma	338-7A>G
chr18	30847016	30847017	malignant_melanoma	1273-1G>A
chr18	56149279	56149280	carcinoma	4380-9A>C
chr18	56149279	56149280	carcinoma	6297-9A>C
chr18	19353582	19353583	carcinoma	532-2_536delAGGTAAC
chr19	14090354	14090355	carcinoma	739-1G>C
chr19	54937847	54937848	carcinoma	639-2A>T
chr19	36606934	36606935	malignant_melanoma	115-8C>G
chr19	3751104	3751105	malignant_melanoma	1657-10C>T
chr19	885015	885016	malignant_melanoma	880-8C>T
chr19	51875566	51875567	malignant_melanoma	158-6G>A
chr19	50783292	50783293	glioma	3910-1G>A
chr19	34297766	34297767	NS	243-1G>T
chr2	198640465	198640466	carcinoma	277-2A>C
chr2	38546161	38546162	carcinoma	364-1G>T
chr2	128480618	128480619	carcinoma	1292-1G>A
chr2	204062022	204062023	carcinoma	6952-2A>T
chr2	204062022	204062023	carcinoma	3082-2A>T
chr2	212251875	212251876	malignant_melanoma	3184-1G>A
chr2	220168553	220168554	carcinoma	281-1G>A
chr2	158971610	158971611	lymphoid_neoplasm	181-2A>T
chr2	114391720	114391721	carcinoma	138-9T>C
chr2	141298673	141298674	carcinoma	7388-7A>G
chr2	191354490	191354491	carcinoma	1793-3T>C
chr2	167083215	167083216	carcinoma	4228-2A>G
chr2	220168553	220168554	carcinoma	281-1G>T
chr2	37496836	37496837	malignant_melanoma	1705-7C>T
chr2	37496836	37496837	malignant_melanoma	1705-7C>T
chr2	239261457	239261458	malignant_melanoma	1452-10T>A
chr2	71036992	71036993	carcinoma	1540-4G>T
chr2	178982774	178982775	carcinoma	424-7C>T
chr2	179516477	179516478	carcinoma	32078-2A>G
chr2	42544562	42544563	glioma	2057-4C>A
chr2	239003058	239003059	carcinoma	1006-2A>C
chr20	32005735	32005736	carcinoma	497-7C>T
chr20	33714186	33714187	carcinoma	845-9C>T
chr20	3520860	3520861	carcinoma	495-8C>T
chr20	42891867	42891868	other	548-2A>C
chr20	47734634	47734635	carcinoma	1190-2A>G
chr20	60582692	60582693	NS	1885-1G>A
chr21	36253019	36253020	haematopoietic_neoplasm	352-10T>A
chr22	41734311	41734312	carcinoma	583-5C>A
chr22	29537930	29537931	other	1260-1G>A
chr3	195498696	195498697	haematopoietic_neoplasm	370-10A>G
chr3	195498696	195498697	haematopoietic_neoplasm	13078-10A>G
chr3	195498696	195498697	haematopoietic_neoplasm	12694-10A>G
chr3	30713125	30713126	carcinoma	455-4T>A
chr3	52011878	52011879	carcinoma	70-8C>T
chr3	129279569	129279570	carcinoma	4994-4A>G
chr3	143513922	143513923	carcinoma	457-4C>A
chr3	64640134	64640135	carcinoma	1211-1C>A
chr3	196792680	196792681	carcinoma	2198-1G>C
chr3	10167951	10167952	malignant_melanoma	202-1G>A
chr3	52539888	52539889	malignant_melanoma	1696-10C>T
chr3	52546347	52546348	malignant_melanoma	2884-9C>T
chr3	126290896	126290897	malignant_melanoma	389-9C>T
chr3	126290897	126290898	malignant_melanoma	389-10C>T
chr3	37340315	37340316	carcinoma	815-8A>G
chr3	49736402	49736403	carcinoma	639-10T>C
chr3	146239840	146239841	carcinoma	356-1G>T
chr3	168825741	168825742	carcinoma	2014-2A>T
chr3	119892317	119892318	carcinoma	934-1G>A
chr3	28380106	28380107	carcinoma	217-1G>C
chr3	119205678	119205679	carcinoma	639-1G>C
chr3	58368239	58368240	carcinoma	202-1G>T
chr3	63820901	63820902	NS	478-3C>A
chr3	178928135	178928136	carcinoma	1404+10T>G
chr3	52439929	52439930	mesothelioma	784-2A>C
chr4	7715950	7715951	carcinoma	1534-10G>A
chr4	53729428	53729429	carcinoma	143-6G>A
chr4	104063070	104063071	carcinoma	5305-6G>A
chr4	20544108	20544109	carcinoma	2144-8C>T
chr4	79285059	79285060	malignant_melanoma	2576-2A>G
chr4	128635081	128635082	malignant_melanoma	2560-9A>T
chr4	6602343	6602344	malignant_melanoma	1406-6G>T
chr4	119610516	119610517	carcinoma	156-8T>C
chr4	70359568	70359569	carcinoma	722-10C>T
chr4	2133018	2133019	carcinoma	1732-2A>T
chr4	146073788	146073789	carcinoma	676-2A>G
chr4	106163989	106163990	haematopoietic_neoplasm	?
chr4	8031506	8031507	carcinoma	1048-4C>T
chr5	7784475	7784476	carcinoma	2385-2A>G
chr5	131927567	131927568	carcinoma	1219-1G>T
chr5	130515786	130515787	carcinoma	19-1G>A
chr5	137495865	137495866	carcinoma	2428-4A>G
chr5	149576272	149576273	carcinoma	218-6C>T
chr5	112136974	112136975	carcinoma	730-1G>A
chr5	112151183	112151184	carcinoma	835-8A>G
chr5	112151183	112151184	carcinoma	835-8A>G
chr5	149786523	149786524	carcinoma	299-1G>T
chr5	112440052	112440053	carcinoma	458-1C>A
chr5	112440052	112440053	carcinoma	1028-1C>A
chr5	55041982	55041983	malignant_melanoma	70-9T>G
chr5	176318554	176318555	malignant_melanoma	97-4C>T
chr5	74879114	74879115	malignant_melanoma	935-3A>C
chr5	74879114	74879115	malignant_melanoma	935-3A>C
chr5	112136960	112136961	carcinoma	730-15A>G
chr5	118502308	118502309	carcinoma	4971-2A>G
chr5	131927567	131927568	carcinoma	1219-1G>T
chr5	56542122	56542123	glioma	479-4G>A
chr5	67590350	67590351	carcinoma	1426-13A>G
chr5	67589105	67589106	carcinoma	1119-25C>A
chr6	168910593	168910594	carcinoma	85-1G>T
chr6	152694356	152694357	lymphoid_neoplasm	9325-3T>C
chr6	152694356	152694357	lymphoid_neoplasm	9325-3T>C
chr6	109954307	109954308	carcinoma	1074-2A>C
chr6	109954307	109954308	carcinoma	1074-2A>C
chr6	9903643	9903644	carcinoma	374C>T
chr6	31584107	31584108	carcinoma	220C>T
chr6	151936571	151936572	carcinoma	1711-6T>C
chr6	39881587	39881588	malignant_melanoma	584-9C>G
chr6	39881587	39881588	malignant_melanoma	584-9C>G
chr6	51910990	51910991	malignant_melanoma	2408-5C>T
chr6	44140946	44140947	carcinoma	663-8G>T
chr6	54791163	54791164	carcinoma	445-5A>T
chr6	80749911	80749912	carcinoma	2260-1G>T
chr6	138195980	138195981	lymphoid_neoplasm	296-1G>A
chr6	36711548	36711549	malignant_melanoma	1490-10C>T
chr7	23808603	23808604	carcinoma	1417-10C>A
chr7	76870997	76870998	carcinoma	240-10T>C
chr7	133981226	133981227	carcinoma	674-9C>T
chr7	45688264	45688265	malignant_melanoma	1021-4G>A
chr7	2972228	2972229	malignant_melanoma	1498-9C>T
chr7	127254615	127254616	malignant_melanoma	337-5C>T
chr7	16832585	16832586	carcinoma	479-5A>G
chr7	56087435	56087436	malignant_melanoma	141-9C>T
chr7	20444242	20444243	malignant_melanoma	1688-8C>T
chr8	143958639	143958640	carcinoma	396-2A>C
chr8	2071121	2071122	lymphoid_neoplasm	3454-3C>T
chr8	27764768	27764769	malignant_melanoma	998-6C>T
chr8	72977801	72977802	carcinoma	445-9T>C
chr8	124152999	124153000	malignant_melanoma	2500-1G>A
chr8	77763114	77763115	carcinoma	3965-7C>G
chr8	15588172	15588173	carcinoma	799-2A>G
chr8	108334356	108334357	carcinoma	576-1G>A
chr8	13251202	13251203	carcinoma	1174-1G>A
chr8	13251202	13251203	carcinoma	1174-1G>A
chr8	103292696	103292697	other	5928-2A>G
chr8	23709898	23709899	carcinoma	119-2A>T
chr9	21968242	21968243	carcinoma	458-2A>T
chr9	21968242	21968243	carcinoma	458-2A>C
chr9	21968242	21968243	malignant_melanoma	458-2A>G
chr9	98232213	98232214	carcinoma	1729-1G>T
chr9	72520860	72520861	malignant_melanoma	508-9C>T
chr9	133799272	133799273	carcinoma	713-6C>A
chr9	21968247	21968248	carcinoma	458-7_461>A
chr9	98240473	98240474	carcinoma	1216-6C>T
chr9	126392755	126392756	carcinoma	619-1G>C
chrX	140785843	140785844	carcinoma	73-1G>C
chrX	84322131	84322132	carcinoma	395-1G>T
chrX	84622771	84622772	carcinoma	283-1C>T
chrX	66942642	66942643	malignant_melanoma	1880-2C>T
chrX	114536551	114536552	malignant_melanoma	92-5T>C
chrX	114536553	114536554	malignant_melanoma	92-3C>A
chrX	123224421	123224422	malignant_melanoma	3278-3C>T
chrX	152938234	152938235	carcinoma	73C>T
chrX	129041339	129041340	carcinoma	27-3C>G
