# Supplementary material for: Genome-wide discovery of human splicing branchpoints
Source: HighWire-hosted journal article supplement (doi:10.1101/gr.182899.114), 2015-01-05
Supplement: Supplemental_TableS4.xlsx [file Supplemental_TableS4.xlsx]

## Sheet: Sheet1
Supplementary Table 4. List of primer sequences utilized in the study.
Gene/Transcript	Forward primer	Reverse Primer
LMPCR primers	AATGATACGGCGACCACCGAGA	CAAGCAGAAGACGGCATACGAG
Roche control 1 (237)	CGCATTCCTCATCCCAGTATG	AAAGGACTTGGTGCAGAGTTCAG
Roche control 2 (268)	CTCGCTTAACCAGACTCATCTACTGT	ACTTGGCTCAGCTGTATGAAGGT
Roche control 3 (272)	CAGCCCCAGCTCAGGTACAG	ATGATGCGAGTGCTGATGATG
FBXW4 linear	CGGAAATGTGTCATGGAGTG	CAGTACACAGGGCTGCTGAG
FBXW4 circular	GGGATTCTGCTGAAGTGGAG	TCCTTCACTGGGACACTGGT
GATA1	GCCTACTACAGGGACGCTGA	TTGAGCAATGGGTACACCTG
HMBS	AGAGAAAGTTCCCGCATCTG	ACTGAACTCCTGCTGCTCGT
MAN1A2 linear	CTATGGCGATTCACTCACGA	AGGTCATCACCGGAGAACAG
MAN1A2 circular	ATACGTGGTGGAGACCCAGA	TGCTCGAATTTCCTCTCTTGA
MYH9	GATCATCCTGGAGGACCAGA	TTCTGTGAGGTTGGTGGTGA
NEAT1	TCGGGTATGCTGTTGTGAAA	TGACGTAACAGAATTAGTTCTTACCA
PLXNB2	GGGGATGATGTGGAGTACGC	CCTGGGAGATGGTGTCACAG
PLXNB2 intron	TGGAAAAGGGGCTGTGGGA	GCGTCCCGTACTACTCCTG
RYR1	TTGACGCTTCCTTCATGCAG	AGCAGGGGAAATGGTCAGAC
EIF1 outer	CCAAATGCTGGGTTGTTCCT	ACAAGTCCCTTCTGCTTTTTCCT
EIF1 inner	ACCTGATGAGTCTCATTCTCACACT	CCCAACTGAGGTTTTGCTCAGCC
SMC4 outer	TGTGACCGGTGGCATTTCTT	TCCTGAGCCTCTACCGGACC
SMC4 inner	GCTGAAGGTTTAGTCACCCCCGT	GTCAACTCCGCGCTCAACAACC
WDR77 outer	CCCTCCTTGCCGTGATTTGC	GCCAGCCTGCTTCCATTACC
WDR77 inner	GTTACTGCCCCTCATCACTGTCT	AAATGACTCGCCCACCCACTGC
LDB1 outer	AGCTAGGGGAGTAGAGTGACTTCT	CCCATGCTGGCAGAGTACATG
LDB1 inner	GGGCTAAAGGCTTTGATGCTCTGG	GCTCAGGCTTGGAAAGGGGTCA
EZH2 outer	TGACGTCTTGCCACACCTGG	TCTGTTTTTGATGGCAGTTTAAGGT
EZH2 inner	AGCCTGAGCCATCAAGCTGTTTG	AGAAACCAACAACAGCCCTTAGG
CALR outer	TGAGGATTTTGAGTTCTAGAGCACT	ACAGCCTAGATCTGCGATCA
CALR inner	TCTCCTTTAAACTTAAGGCTCCACCCA	TGCTGGGACTTATTCTTTTAGCTCCC
SS18 outer	AGCTTGCTGATCTCGTGTAGCT	AGAAATGGCAAGTCATGGTTATACA
SS18 inner	ATGCTCGTATGGCAGAGACGCT	TGGGCTCCCTGCAACTTTCAAG
SLC43A3 outer	GATTTGAACCTGGGCCTGCC	GCCAGCCCCCATGTAATCCT
SLC43A3 inner	AAAGGAAGCCTGGCTCTCAC	GCTTTACCCTGTCCATCCCA
PLEKHH3 outer	CCACCCTACCCTACCCCTGA	GAAGGAGACGGGATGGGACG
PLEKHH3 inner	CTGTTAAGACTGGCGGGAGG	TCATCCCTAGTTCGCCAAGC
SF3A2 outer	GAAGGGCTCTGGGGATTGGG	GGCTCACCACACCTCCACTT
SF3A2 inner	ACAAAGGAGCACCATCCTCG	AGAAGCTTCCACAAGACCCG
